# Supplementary material
Source: publisher site journal article supplement (https://www.spandidos-publications.com/8625/downloadSupplementary)
Supplement: Supplementary file 1 [file downloadSupplementary]

## Sheet: Table SI
Table SI. Overall included data for the meta-analysis.
First author, year	Country, design	Study period, follow-up	Participants, n	Age and sex	CKD definition and staging	RCC definition (ICD codes)	Comparison group	No. of RCC Cases (CKD/Control)	Person-years (CKD/control)	Incidence rate (per 100,000 PY)	Adjusted HR (95% CI)	Covariates adjusted	(Refs.)
Christensson, 2013	Sweden, population-based Cohort	1974-1992, median 28 years	Total: 24,552 CKD: 854 Control: 23,698	Younger men: 47 yrs Older men: 60 yrs Younger women: 40 yrs Older women: 54 yrs	eGFR <60 ml/min/1.73 m² (CKD-EPI)	Swedish Cancer Registry	eGFR ≥60 ml/min/1.73 m²	Younger men: CKD: Not specified Control: Not specified Total kidney cancer cases: 118	/	/	Younger men: SHR = 3.38 (1.48-7.71) Older men: 1.35 (0.31-5.94) Older women: 1.92 (0.58-6.41)	Age, smoking history	(17)
Park et al, 2021	South Korea, retrospective cohort	2009-2016, median 7.3 years	Total: 9,809,317 CKD (eGFR<60): 569,868 Control: 9,239,449	≥20 years Male: ~54% Female: ~46%	CKD Definition: eGFR <60 ml/min/1.73m² or presence of proteinuria (trace or higher). Staging: • eGFR <30 • eGFR 30-59 • eGFR 60-89 (Reference) • eGFR 90-119 • eGFR ≥120	ICD-10 code C64 (Malignant neoplasm of kidney, except renal pelvis), confirmed via national critical illness registry.	eGFR 60-89 ml/min/1.73m² & No proteinuria	Total: 10,634 By eGFR: • <30: 150 • 30-59: 1,018 • 60-89: 6,089 • 90-119: 2,808 • ≥120: 569 By Proteinuria: • Absent: 9,758 • Trace: 323 • 1+: 338 • 2+: 159 • 3+: 45 • 4+: 11	Total: 71,410,423 By eGFR: • <30: 1,010,231 • 30-59: 3,076,084 • 60-89: 38,824,629 • 90-119: 23,725,308 • ≥120: 4,815,196 By Proteinuria: • Absent: 68,111,919 • Trace: 1,604,521 • 1+: 1,180,481 • 2+: 427,845 • 3+: 106,406 • 4+: 20,272	Overall: 14.9 By eGFR: • <30: 14.8 • 30-59: 33.1 • 60-89: 15.7 • 90-119: 11.8 • ≥120: 11.8 By Proteinuria: • Absent: 14.3 • Trace: 20.1 • 1+: 28.6 • 2+: 37.2 • 3+: 42.3 • 4+: 54.3	Model 3 (Fully Adjusted): eGFR (vs. 60-89): • <30: 1.18 (1.01, 1.39) • 30-59: 1.22 (1.14, 1.31) • 90-119: 1.00 (0.96, 1.05) • ≥120: 0.99 (0.91, 1.08) Proteinuria (vs. Absent): • Trace: 1.19 (1.07, 1.33) • 1+: 1.45 (1.30, 1.62) • 2+: 1.64 (1.40, 1.92) • 3+: 1.68 (1.25, 2.26) • 4+: 2.08 (1.16, 3.75)	Model 2 (Main model): Age, sex, income level, body mass index, smoking status and amount, regular exercise, cardiovascular disease, hypertension, diabetes mellitus. Model 3 (Mutual adjustment): Model 2 + kidney function measurements (i.e., adjusting proteinuria in analysis with eGFR and vice versa).	(18)
Kitchlu et al, 2022	Canada, population-based cohort	2007-2016 Median 5.33 (IQR, 3.2-7.1) years	Total: 5,917,148 CKD (eGFR<60): 439,554 Dialysis: 29,809 Transplant: 4,951 Control (eGFR≥60): 5,432,283*	Mean Age: 53.8±17.2 Sex: 56.6% Female, 43.4% Male The CKD group was older, while the dialysis group had a higher proportion of males	Definition: Based on two eGFR measurements or dialysis/transplantation registrations. Installment (KDIGO) • G3a: 45-59 • G3b: 30-44 • G4: 15-29 • G5: <15 (No dialysis) • Dialysis Kidney transplantation	All cancers are identified by the Ontario Cancer Registry using the ICD-O-3 code. Renal cancer is included in "kidney cancer", but the ICD-10 code for renal cell carcinoma is not listed separately in the literature.	eGFR ≥60 ml/min/1.73 m²	The literature does not provide the exact number of renal cancer cases by group. Overall: 325,895 cancer diagnoses. Key finding: Among CKD G4/G5, dialysis and transplant patients, renal cancer is one of the top five most common cancers.	Total population years: 29,993,847 The literature does not provide the exact number of person-years by group	The literature does not provide the grouped incidence rates of renal cell carcinoma. Key finding: The diagnostic risk of renal cancer and Multiple Myeloma progressively increases with the deterioration of eGFR.	Incidence of renal cell carcinoma (vs. eGFR≥60): The risk increases significantly as renal function deteriorates. The specific aHR value is not explicitly provided in the main text of the literature, but it is shown in Figure 2 that the association strength is very high. Renal cancer mortality rate (vs. eGFR≥60): The risk is gradually increasing in the category of kidney diseases. The specific aH…	Age, sex, income quintile, urban/rural residence, Charlson comorbidity index, and the presence of specific comorbidities (including AKI, MI, CHF, cerebrovascular disease, diabetes, chronic liver disease, GI hemorrhage, HIV, PVD, IHD, and hypertension).	(19)
Hofmann et al, 2015	USA, nested case-control	1998-2008, based on diagnosis date matching	Total: 34,167 Cases: 3,136 Controls: 31,031 By race: • White: 2,152/21,478 • Black: 293/2,836 • Hispanic: 425/4,147 • Asian: 255/2,484	Age: Matched with the age at diagnosis of the case (±1 year) Gender: Match by gender Specific distribution • 18-54: 24% 55-64: 28% • 65-74: 28% 75-99: 21% • Male: 64%	CKD definition: Determined by the ICD-9 code 585 diagnosed by the doctor in the electronic medical record. Staging: No specific staging was provided. The study used binary classification (with/without a history of CKD).	ICD-O-3 C64.9 Exclude transitional cell carcinoma	Subjects without a history of CKD In the analysis by race, non-CKD individuals of the same race were used as the reference	Overall • CKD(+): 66 / 210 • CKD(-): 3,070/30,821 By race: • White: 15/118 Black people: 30/33 • Hispanic: 11/40 • Asian: 9/18	Not applicable This study was a case-control design and did not include adults	Not applicable This study was a case-control design, reporting odds ratios rather than incidence rates.	OR (95% CI) of CKD and RCC risk: Overall: 2.8 (2.1-3.7) • White people: 1.1 (0.6-1.9) • Black: 10.4 (6.0-17.9) • Hispanic: 2.3 (1.1-4.6) • Asian: 5.1 (2.2-11.7) Interaction P value: <0.001	The main model: Adjusted for smoking status and history of diabetes. Sensitivity analysis: In some subgroups with available data, additional adjustments were made to the measured blood pressure and BMI, but the results remained largely unchanged.	(20)
Lowrance et al, 2014	USA, retrospective cohort	2000-2008, median 5.3 years; total 6,000,420 PY	1,190,538 adults; All with eGFR data, no prior cancer; CKD groups defined by eGFR	≥40 years; Median 55; 47% Male, 53% Female	eGFR by CKD-EPI: ≥90, 60-89, 45-59, 30-44, <30 ml/min/1.73m²	Renal cancer (any RCC): ICD-O-3 histology codes: 8000/3, 8010/3, 8050/3, 8140/3, 8211/3, 8255/3, 8260/3, 8310/3, 8312/3, 8316/3, 8317/3, 8318/3, 8319/3, 8320/3, 8323/3	eGFR 60-89 ml/min/1.73m² & No proteinuria	Total RCC Cases: 1750; By eGFR group: ≥90: 241 60-89: 826 (Ref) 45-59: 395 30-44: 196 <30: 92	Total: 6,000,420 PY; Not broken down by eGFR group in paper	Age-sex adjusted rate per 1,000 PY: ≥90: 0.22 → 22/100k 60-89: 0.22 → 22/100k (Ref) 45-59: 0.39 → 39/100k 30-44: 0.62 → 62/100k <30: 1.08 → 108/100k	vs. eGFR 60-89 (Ref): ≥90: 1.08 (0.93-1.26) 45-59: 1.39 (1.22-1.58) 30-44: 1.81 (1.51-2.17) <30: 2.28 (1.78-2.92)	Age, sex, race, socioeconomic status (income, education), smoking status, BMI, prior healthcare utilization, proteinuria, hematuria, abdominal imaging use, comorbidities (HF, HTN, DM, CHD, chronic lung/liver disease), prescription drug use (ACEI/ARB, aldosterone blocker, α-blocker, β-blocker, CCB, statin, non-statin lipid-lowering drug, 5-α reductase inhibitor)	(21)
Mok et al, 2017	South Korea, prospective cohort study	1996-2004 (baseline), FU until 2012; median 11.3 years	242,583 total; No prior cancer; CKD groups by eGFR: ≥90: 136,810 60-89: 103,064 45-59: 2,351 <45: 358	Mean 44.4±9.6 years; 33.1% Female, 66.9% Male	eGFR (CKD-EPI): ≥90, 60-89, 45-59, <45 ml/min/1.73m²	Kidney Cancer (Site-specific analysis); ICD-10 codes not explicitly listed for RCC in main text, but site-specific analysis was performed.	For RCC analysis: eGFR <45 vs ≥45 ml/min/1.73m²	Total Kidney Cancer Cases: 408; Cases by group (eGFR <45 vs ≥45): Not explicitly reported. Figure 1 shows analysis was done for this comparison.	Total PY not reported for RCC; PY by eGFR group not reported.	Overall cancer incidence rate: 556/100,000 PY; Site-specific RCC rate not reported.	For Kidney Cancer (eGFR <45 vs ≥45): Adjusted HR: Significant association reported. Exact point estimate and CI not in main text; Figure 1 shows the bar and CI but not the numerical value. Association remained significant after excluding first 3 years of follow-up.	Model 3 (Fully Adjusted): Age, sex, total cholesterol, diabetes, cardiovascular disease, current smoking status, systolic blood pressure, antihypertensive medication use, body mass index, and proteinuria (the other CKD measure).	(22)
Park et al, 2019	South Korea, nationwide population-based matched cohort study	2009–2016, median follow-up: 4.77 years (CKD), 4.80 years (control)	471,758 / 471,758	Median age 64 years; 51.5% male	Pre-dialysis CKD defined by ≥2 consecutive eGFR <60 or albuminuria; staged by KDIGO	Kidney cancer: ICD-10 C64	1:1 matched controls without CKD, matched on age, sex, low-income, smoking	797 / 317	Not explicitly provided for RCC alone; total PY for all cancers: CKD: 2,252,000; Control: 2,264,000 (estimated from incidence rates)	CKD: 35.38; Control: 14.00	2.41 (2.11–2.76)	Age, sex, low-income status, smoking history, hypertension, diabetes mellitus, body mass index	(23)
ACEI, angiotensin-converting enzyme inhibitor; AKI, acute kidney injury; ARB, angiotensin II receptor blocker; BMI, body mass index; CCB, calcium channel blocker; CHF, congestive heart failure; CI, confidence interval; CKD, chronic kidney disease; DM, diabetes mellitus; eGFR, estimated glomerular filtration rate; HR, hazard ratio; HTN, hypertension; ICD, International Classification of Diseases; …

## Sheet: Table SII
Table SII. CKD-related gene data obtained from the GEO database.
ID	adj.P.Val	P.Value	t	B	logFC	SPOT_ID	GB_ACC	SEQUENCE
A_24_P208737	0.0613	2.15e-06	6.66	4.3564	6.25e-01	A_24_P208737	NR_004431	TGGTAAACATCTCACCACCAACCCACTGTGGTGGCTAAAATCCCACCTTTAGTCCCAGCA
A_23_P53884	0.085	6.18e-06	-6.15	3.5306	-0.73	A_23_P53884	NM_005584	TGGAAAAACTTTAGAGGATGATTTAATCAAGAGCCGAAATTATTACCCTTCTCAAAGTCC
A_23_P89780	0.085	1.096e-05	5.88	3.0757	5.49e-01	A_23_P89780	NM_198129	TCTAATTTTGAATTCTGACCATGGATACCCATCACTTTGGCATTCAGTGCTACATGTGTA
A_23_P41476	0.085	1.193e-05	-5.84	3.0077	-0.724	A_23_P41476	NM_001080505	GACTTTTTGTTCAGCAACATTTAGTGTTTCAGTGAAAGTTGGACAGTTGGGGCTTAAAAC
A_33_P3333158	0.0937	2.041e-05	-5.6	2.5759	-0.587	A_33_P3333158	NM_198148	GGAAAAGGAATCCCAAACGCCATTATCTCCGTAGAAGGCATTAACCATGACATCCGAACA
A_23_P126075	0.0937	2.269e-05	-5.55	2.4901	-0.63	A_23_P126075	NM_002245	AGTATGCTGCTGTGGTTAGAAGCAGATTTTATACTTTTAACTGGAAACTTTGGGGTTTGC
A_33_P3334102	0.0937	2.938e-05	5.43	2.2807	5.40e-01	A_33_P3334102	NM_174919	CTCCCTGGAAGCCCAGAGGCTTTTCGTAATCCAATTGGTGGCAAAATTGCGCTTGAACTG
A_23_P46309	0.0937	3.007e-05	5.42	2.2617	4.04e-01	A_23_P46309	NM_001048199	GCCAAATATTTGGCTCAGAACAGGTGTCCATGGGACAAAAAAGAACGATCCTCCACTTGA
A_23_P126706	0.0937	3.166e-05	-5.4	2.2198	-0.675	A_23_P126706	NM_004673	AGGCGGGTCATACTCCTTAAGAGCAGTTCAGATGATGATCAAGCCTATTGACTGAAGAGA
A_23_P115492	0.0937	3.288e-05	-5.38	2.1889	-0.631	A_23_P115492	NM_024749	AGTCAACAGATGTTATTTCAGTCTCAGTGCATCTCCTCTGGCTTTCTTTGACTGAAGGTG
A_23_P167389	0.1172	4.916e-05	5.2	1.8603	6.46e-01	A_23_P167389	NM_022481	ATATTTGATACGTAGGGGTTCCATGAGAGATTTTGGGTTTTAAAGGAATGGTTTTACTGC
A_24_P190472	0.1172	5.14e-05	-5.18	1.8238	-1.31	A_24_P190472	NM_003064	AAGAGATGTTGTCCTGACACTTGTGGCATCAAATGCCTGGATCCTGTTGACACCCCAAAC
A_32_P14610	0.1172	5.344e-05	-5.16	1.792	-0.326	A_32_P14610	NM_006457	GAGAGCCTTCTCAGACATGAAGCAAGGGAAACATACTGAATAGTTTTACACAAATTTGAT
A_32_P4018	0.1295	6.358e-05	-5.08	1.6492	-0.562	A_32_P4018	AK000776	TTCAGATCTTTTTCTCCTTTTTTGCACAAAACTATGCTTATGGTTTGTGTCACAGAAGTG
A_23_P154338	0.1383	7.276e-05	-5.02	1.5381	-0.67	A_23_P154338	NM_025202	AAGAACGAAAGAATAGTTAGGATACCAATGAGTAAAAGGGTTCCTGTTCACTCTGACTCT
A_33_P3379341	0.1387	7.808e-05	4.99	1.4799	4.43e-01	A_33_P3379341	NM_001144931	TATTCTAAAACACAATCAGAGTACTCCATTCCTGCTAACAGTTTAAAGCCAAACACCTAG
A_23_P91970	0.1387	8.82e-05	-4.94	1.3793	-0.779	A_23_P91970	NM_207365	TGTGTATGTATAGCCCTTACATAGTGGATTGTAATTTGTGATATTTTGTGGTTTTGGAGC
A_23_P121665	0.1387	9.045e-05	-4.93	1.3585	-0.376	A_23_P121665	NM_020777	ATGTTAATATTTCTATTAAGAACATGTTGGGCATGTGGACCCAAGCACCTGGGAAGGAGG
A_33_P3339051	0.1387	9.375e-05	4.91	1.3288	6.72e-01	A_33_P3339051	NM_182498	ACAGTGGTCATGGGGGATGGGGTACTGCCGGTCTGTGTTGTCTTAGAAGTAGATGTGTGA
A_33_P3783812	0.1387	0.00011517	4.82	1.1585	6.81e-01	A_33_P3783812	AK022255	ATGTGATGTGATTCATGTAACAAGTGCTTCTGCCTTAAACCCAGAGTCTGTGCCTTGGCT
A_33_P3417452	0.1387	0.00011656	4.81	1.1486	5.89e-01	A_33_P3417452	NM_001103167	CTCTCAGGAAGGATGAGCATTGTTACAGCAGGGACAATAAAGTACAGAGATATGCCGAGA
A_23_P131676	0.1387	0.00011855	-4.81	1.1345	-0.859	A_23_P131676	NM_020311	ATCTGTGTGGTGTTTTGTACCGGCACGGGATATGGAACGAAAACTGCTTTGTAATGCAGT
A_33_P3341499	0.1387	0.00011879	-4.81	1.1328	-1.13	A_33_P3341499	NM_003392	GCATCTTAGACCATTTTTATATGCAGTGTACAATTTGCTGGGCTAGAAATGAGATAAAGA
A_23_P257478	0.1387	0.00012086	-4.8	1.1185	-0.364	A_23_P257478	NM_000500	AGAACTCGAAGCCCTTCCAGTGGTACCAGCTCACTCCCTGGGAAAGGGGTTGTCAAGAGA
A_23_P105651	0.1387	0.0001216	-4.8	1.1134	-1.24	A_23_P105651	NM_013377	TCGGTAGAGTATGATTGCCTCGTTCAATGTGGCGTTTTTATATATATTTTGTGACTCTTT
A_24_P194881	0.1441	0.00013608	4.75	1.0201	7.08e-01	A_24_P194881	NM_001080420	GTTTGGAGTCTGGACTAAGCTCCATCCACGTCACTCACAAGTTTCTGTTTATATTTCTAG
A_23_P63390	0.1441	0.00014375	4.72	0.9745	6.05e-01	A_23_P63390	NM_001017986	TTTAGTGAACACTGTTCTCTGGGTGACAATACGTAAAGAACTGAAAAGAAAGAAAAAGTG
A_23_P158725	0.1441	0.00014685	4.71	0.9568	9.56e-01	A_23_P158725	NM_001042422	GTCTTGGGGACAGCTCTTTCCACCCCTGGAAGATGGAAATAAACCTGCGTGTGGGTGGAG
A_24_P280983	0.1441	0.00015085	-4.7	0.9344	-0.862	A_24_P280983	NR_002795	TGAGCCTTACGCTTCTTTCCACAGCCTTTGCAGGCGGAATATCGGAATAAAGTGGGTCCA
A_24_P77904	0.1441	0.00015162	-4.7	0.9302	-0.637	A_24_P77904	NM_018951	GCCATATCATGCTAAAATTCTATAGAGATAGATATTGTCCTAAGTGTCAAGTCCTGACTG
A_24_P414332	0.1451	0.00016167	-4.67	0.8768	-0.424	A_24_P414332	NM_005935	TATATATTAGTATATCGGCCTGGAGAGGACAAGGGAATAAGACCACTCATAGTGAGGCTG
A_33_P3262670	0.1451	0.0001757	4.63	0.8075	4.21e-01	A_33_P3262670	NM_001173517	AGCCTTAGGGGTGTCACTCTTAAAATCGCATATTCAACAAACAAATGCCTTCTAAGTACT
A_33_P3273020	0.1451	0.00018173	4.62	0.7794	4.94e-01	A_33_P3273020	NM_004470	TTCGAGGTGGAGCTGCTCAAAATAGAGCGACGAACTGAGCTGTAACCAGACTGGGGAGGG
A_33_P3330608	0.1451	0.00018869	4.6	0.748	7.64e-01	A_33_P3330608	NM_032152	CGGGAAAGTCACAGAGCTGCCTGGGCTTGTACCTGGCCACATAAAGCCCCAGTTTAAAGC
A_23_P41629	0.1451	0.00018975	-4.6	0.7434	-0.911	A_23_P41629	NM_139056	GAAATGGGAAAAATGAAATTCCTGCTAAGGTGCTTCTATCTCTTTCAGATTCATGCATTG
A_23_P16562	0.1451	0.0002029	4.57	0.6875	6.23e-01	A_23_P16562	NM_001017392	AAGCAGGATCGTTGAAGTTTTAAGTATGGGCAAAAATCTGGAAAACTTAGGATCCCTCTG
A_23_P138524	0.1451	0.00020549	-4.57	0.6769	-0.886	A_23_P138524	NM_198148	TTATCTTGCAAGAAAAAAGTATGTCTCACTTTTTGTTAATGTTGCTGCCTCATTGACCTG
A_33_P3210468	0.1451	0.0002056	-4.56	0.6764	-0.553	A_33_P3210468	NM_003833	ATCAGCGCAGGGACAGAGCTTCGGAGCCCATGCGAATGCGAAAGCCTCGTGGAGTTCCAG
A_32_P125338	0.1451	0.00020787	-4.56	0.6673	-0.801	A_32_P125338	NM_207334	ACAAAAAGCCCAAAGATCTATGTGTCACTGATCATTGTAAATAAAGTGGACCTGCTTTTA
A_23_P64879	0.1451	0.00020884	-4.56	0.6634	-0.527	A_23_P64879	NM_004982	CTTCCCTCATGGTACCAAAGGTGCAATTTATGACTCCAGAAGGAAATCAAAACACATCGG
A_23_P10980	0.1451	0.00022534	-4.52	0.5999	-0.652	A_23_P10980	NM_015236	CTAATGGCAGAAAAAGAAGTTGAGCAATTTCTATGTAATGTACAGATACTAGCATTGCAC
A_23_P381261	0.1451	0.00022945	4.52	0.5848	7.07e-01	A_23_P381261	NM_139247	CTACAGCCGGGGTGTCATCAAGGTGAAAGGCAAAGGGCAGCTCTGCACCTACTTCCTGAA
A_23_P326931	0.1451	0.00023336	4.51	0.5707	6.46e-01	A_23_P326931	NM_145170	GGAGAACGAAAGAATCTTCACTATAAACAGAGACCCATTCATTTATTTCCATTGGCTGTG
A_32_P80850	0.1451	0.00024417	-4.49	0.5329	-0.519	A_32_P80850	NM_021110	GTTCCTGGACCCCAAGGTCCTTCTGGCCAGCCTGGATATTGTGACCCCTCATCATGTTCT
A_24_P659122	0.1451	0.0002466	4.49	0.5246	1.34	A_24_P659122	XR_132464	GGCCTCTCCAGGTGCAAAAGTTCCTCGAGTCCGTCTCTCCAGGTCCAGCTCCTCCTGTCT
A_23_P253958	0.1451	0.00024965	-4.48	0.5143	-0.88	A_23_P253958	NM_005824	GCACCACTACAATGTCCATTTTAATGGCCTGGAATGCAAAACGCCTGAAGAATACAAAGG
A_33_P3277173	0.1451	0.00025116	-4.48	0.5092	-1.13	A_33_P3277173	AB111888	CCTCAGATCCATAACATGCAGACCCATGGGATACATTATAATTTCATTCTCAGTCTGGTT
A_24_P57730	0.1451	0.00025647	4.47	0.4918	3.49e-01	A_24_P57730	NM_181304	ACTAGCCCAACTATGAGAAATAGCTGTTCTGTGAACGTGAAAAGGGGACAGCAGTTTTCC
A_33_P3356776	0.1451	0.00026377	4.46	0.4683	3.80e-01	A_33_P3356776	NM_001010917	GGTTGGACTGAAAGCGAGGCCAAAAGTAATCAATTAATGATATCAATAAATCCTCATTTC
A_23_P81103	0.1451	0.00026824	-4.45	0.4542	-1.7	A_23_P81103	NM_003013	ATAACCTACATCAACCGAGATACCAAAATCATCCTGGAGACCAAGAGCAAGACCATTTAC
A_33_P3300267	0.1451	0.00026917	-4.45	0.4513	-1.03	A_33_P3300267	NM_053276	CAGAGCACCAGCAAGTGCTGCTTTACTAACTGACGTGTTGGACCACCCCACCGCTTAATG
A_33_P3239338	0.1451	0.00027032	4.45	0.4478	5.46e-01	A_33_P3239338	NM_001105540	GGCGGGACTCTCACGGTGACATGTTTACAGCTGGGTGTGACTCAGTAAAGTGGATTTTTT
A_23_P39955	0.1451	0.00027131	-4.44	0.4447	-1.93	A_23_P39955	NM_001615	TAAAGTCAGAACAGGTTCTCCAAGGATCCCCTCGAGACTACTCTGTTACCAGTCATGAAA
A_33_P3242743	0.1451	0.00027477	4.44	0.4341	4.60e-01	A_33_P3242743	NM_001134758	CCTCCCAGTAGCTGTGCAACTACAACCAGTTTTATGAAAAAGCTTTATAAAAATAAGCTT
A_33_P3336198	0.1457	0.00028119	4.43	0.4148	4.87e-01	A_33_P3336198	NM_182563	TCTGCTTCCCGAGCAACATCTGCGTGTCGGTCTGCTTTTATTACCTCCCAGACTGAGCCC
A_23_P56746	0.1519	0.0002984	-4.4	0.365	-1.06	A_23_P56746	NM_004460	TTTCTGGTACTCTGTGAAAGAAGAGAAAAGGGAGTCATGCATTTTGCTTTGGACACAGTG
A_33_P3309319	0.1519	0.00030372	4.39	0.3502	6.78e-01	A_33_P3309319	NM_145886	TCTCCAGTGTGTGGGGACGGGTCCCTGTGAGCAACAAAACTGCACTGTTTCTTTCACCTC
A_23_P205177	0.1598	0.00032519	-4.36	0.293	-1.22	A_23_P205177	NM_000504	GTCATCAAGCACAACCGGTTCACAAAGGAGACCTATGACTTCGACATCGCCGTGCTCCGG
A_23_P65278	0.169	0.00035287	-4.33	0.2245	-0.82	A_23_P65278	NM_015678	TAGCTTAGAATTGGGAGGATACTTAACATCTGGAAGACAAGTTCATTTCATCTTGAGATC
A_24_P229531	0.169	0.00035559	4.33	0.2181	5.42e-01	A_24_P229531	NM_001031716	ATTCGGTTGACCAGAGGGTATGCATCCATGTGGAAAGGATGTCTGACACTTTATACTGGA
A_33_P3217983	0.1746	0.00037361	4.3	0.1766	4.13e-01	A_33_P3217983	NM_203380	CTGCTCTACCTTACCCACAGATAACACATGTTGTTTCTACTTGTAAATGTAAAGTCTTTA
A_23_P80040	0.1756	0.00039314	-4.28	0.1338	-0.891	A_23_P80040	NM_006404	ACAATCAAAATACAACATTCAATACTTCCAGGTGTGTCAGACTTGGGATGGGACGCTGAT
A_32_P174365	0.1756	0.00039569	-4.28	0.1284	-0.391	A_32_P174365	NM_015265	CTGTCATATAATATCTATTTGGAAGAAGAAACTTTCTCTTGTAGTGCCTCTTGACAAAGC
A_33_P3279590	0.1756	0.00039798	-4.28	0.1236	-1.01	A_33_P3279590	NM_033014	GGTACATGTTCCAAAAACTTTGAAAAGCTAAATGTTTCCCATGATCGCTCATTCTTCTTT
A_33_P3239143	0.1756	0.00040323	4.27	0.1125	1.19	A_33_P3239143	NM_198458	GGCAGTTCCGGCCTGGCGCACCACCGGCTTTCGCACACGGGAGAGCGACCCTTCGCCTGC
A_33_P3330404	0.1756	0.00040693	-4.27	0.1049	-1.21	A_33_P3330404	NM_001164379	GGTGGGCTGGAGCAGGTGTGGCCCTGATTCTGTGTTGCTCTTCTCATAAAATGTTCTGTT
A_23_P329198	0.1756	0.00041536	4.26	0.0877	5.44e-01	A_23_P329198	NM_001031716	ACATGTCATAAGTGGTACCCACTTCCCCTTTTTACTGTAGGGTGGATAACTCTTAGGATT
A_23_P215744	0.1756	0.00041879	-4.25	0.0808	-0.36	A_23_P215744	NM_033427	TTTATGTTCACTTGATGGGGAATGACTAGAATGGGGCAATAACAAATCATTTCTAAACAG
A_23_P36305	0.1773	0.00043005	4.24	0.0585	6.01e-01	A_23_P36305	NM_033388	TGGCAGGACCTGGCCTGTTTGTTTAAAAATGAAGTATGGGTTGGGGGATTACGCTAGTTT
A_33_P3212729	0.1773	0.00043541	-4.24	0.0481	-0.972	A_33_P3212729	NM_001164595	AGAAAATTTTGGACAACTGGATGACAATCCAAGAACTGATGACCCATGGGGCCAAGTCTC
A_23_P1782	0.1773	0.00045194	4.22	0.0168	7.48e-01	A_23_P1782	NM_002231	CATCAGGGTTCTCTTAGCAACTCAGAGAAAAATGCTCCCCACAGCGTCCCTGGCGCAGGT
A_23_P103932	0.1773	0.00045244	4.22	0.0158	9.08e-01	A_23_P103932	NM_001042747	TTGCAGAGCACTTCCCACCTCTCTGAATAGTGTGTATGTGTTGGTTTATTGATTCTGTAA
A_23_P130343	0.1773	0.00045412	-4.22	0.0127	-0.406	A_23_P130343	NM_198991	AGAGACCACACCTGTATTCATATGGGAACAATTGGAATAGTGATATCCTCAAGGTGTAAA
A_23_P211631	0.1795	0.00047073	-4.2	-0.0175	-0.976	A_23_P211631	NM_006486	GGAATGGCTGGGATTTCTCGGCACTCTGCATCATCCATCTTTTCTTATAGGTGGGAAAAT
A_23_P431388	0.1795	0.00048974	4.19	-0.0508	1.06	A_23_P431388	NM_144569	TGTTTGAACTTCCTGTTTGACAATGTTTGCTGTTGATTTTTTGTTCAATAAAGAATTTGG
A_23_P21324	0.1795	0.00050389	-4.17	-0.0747	-0.366	A_23_P21324	BC103755	ACTTTCACGCCGCTATTCTTTTCCTTTCTCCGTGATTGCTTGGCTAGCCATTTTAAAAAA
A_23_P134058	0.1795	0.0005112	4.17	-0.0868	2.96e-01	A_23_P134058	NM_001242629	ATTTTGGCAAGTGTACATGGCTAAGAACAAGTGGAATCAGAATTCAACTTAAGTTTGCTT
A_33_P3324781	0.1795	0.00052697	4.15	-0.1124	8.61e-01	A_33_P3324781		ATGTCGCCTCTCCAGCATGACTGTATCCACATGTGGCCTCTCCAGTGTGACTCTGTTTGC
A_33_P3250730	0.1795	0.00052705	4.15	-0.1125	3.68e-01	A_33_P3250730	NM_018674	AGTCCTCTCTCCCTCCAGTCTGATTTTATAAAGTGCTGACGAGATTGGGAATAAAGAGGC
A_23_P150053	0.1795	0.00052755	-4.15	-0.1133	-0.958	A_23_P150053	NM_001613	ATCATGAAGTGTGATATTGACATCAGGAAGGACCTCTATGCTAACAATGTCCTATCAGGG
A_23_P407840	0.1795	0.00053361	-4.15	-0.1229	-1.88	A_23_P407840	NM_032532	TTTTTTGTTTGTTTGTAATAGCACATCCCAGAGACATCAGAAACCAGCAACTGATTCAGT
A_23_P216361	0.1795	0.00053644	-4.15	-0.1274	-0.789	A_23_P216361	NM_021110	TTAAAAAGTTCCCTTAATCTATGACATGGTAGCAATGATTTCCCTTTGGTGTCTTAATGG
A_23_P7853	0.1795	0.00053655	4.15	-0.1276	3.56e-01	A_23_P7853	NM_007058	CCAGGTATGCAGATGATGACCTGATCATAGACTTTGACAGCTTCATCAGCTGTTTCCTGA
A_23_P56578	0.1795	0.00053836	-4.14	-0.1304	-1.12	A_23_P56578	NM_053276	CAAAATAAATGTTCGGAATACAGTGCAGCCCTTACGACAGGCTTACGTAGAGCTTTTGTG
A_23_P82990	0.1795	0.000541	-4.14	-0.1345	-1.24	A_23_P82990	NM_033014	AACTAATGATCACAGCTATTATACTACTTTCTCGTTATTTTGTGTGCATGCCTCATTTCC
A_33_P3212257	0.1795	0.00054164	-4.14	-0.1355	-1.18	A_33_P3212257	NM_007351	GGTGAACATGCTTAAAAATACATTCCTTGGATATCTGACAACGTGTTTCTGAAAAACAGA
A_33_P3256088	0.1802	0.00055733	4.13	-0.1595	6.82e-01	A_33_P3256088	NR_037596	AGCTCTTGCCTCTGAGTGGCCTCTCCAGGAGCAAAACTTTCTCAAGTCGGCCTCTCCATG
A_23_P122068	0.1802	0.00056002	-4.13	-0.1636	-0.979	A_23_P122068	NM_181435	TTGGGGAAGACTTGTAGCTGAGCTGATTTGTTACGATCTGAGGAACATTAAAGTTGAGGG
A_32_P194072	0.1802	0.00056624	4.12	-0.1729	4.00e-01	A_32_P194072	NM_015395	ATGGGGCTCAGGGCCTCTTTACCATGTGCAGTGACCATTTCTCAGAGCAGGACTTGCAAA
A_33_P3227324	0.1802	0.00057343	4.12	-0.1835	3.96e-01	A_33_P3227324	NM_017550	AAGTGATAACTGCCTTGAACCCCCCTTTGCTGTTTTATTTATTAAACTTGATTTGAAGCC
A_23_P21495	0.1802	0.00057526	4.12	-0.1862	1.62	A_23_P21495	NM_003890	TCAGTCATCCACCAGGAACGAAGATTTCCTGAAGAAGACCTGGTCCCTCTGGAGGTTGCG
A_24_P253003	0.1841	0.00059591	-4.1	-0.2159	-0.515	A_24_P253003	NM_004626	TTTGCTTTTTCTTCCTTTGGGATGTGGAAGCTACAGAAATATTTATAAAACATAGCTTTT
A_23_P16157	0.1841	0.00060062	-4.1	-0.2225	-0.564	A_23_P16157	NM_003685	TCAAAATTGGGATCCTTCCATGTTGAGCCAGCCAGAGAAGATAGCGAGATCTAAATCTCT
A_23_P89941	0.1857	0.00061671	4.09	-0.2448	5.54e-01	A_23_P89941	NM_001800	GAGTTATTCATATTCTGTTGGAAGCTTGTTTTCCAGTCTCTTGTACAGCGTTTTAAAAGA
A_33_P3252068	0.1857	0.00061886	4.08	-0.2477	3.32e-01	A_33_P3252068	NM_030647	TGCCATGGCAGTAACCATGAGGTTAGGCAGTTGTATCGCTATGATAAACCAGTGGAATGT
A_23_P312132	0.1875	0.00064371	4.07	-0.2809	1.27	A_23_P312132	NM_000887	TTCATCGTGGGGCTCTCAGTTCCGATTCCCCAGGCTGAATTGGGAGTGAGATGCCTGCAT
A_23_P125078	0.1875	0.00064773	4.06	-0.2861	5.37e-01	A_23_P125078	NM_173626	TACCTGTCCGTCAGTGTGTGGATGTATGTTTACAGTTCTACATAAATGGGATCATTTTAT
A_33_P3256095	0.1875	0.00065205	4.06	-0.2917	5.03e-01	A_33_P3256095		TCTGGATGCAAAAGTTCCTCGAGTCAGCCTCTCCAGGCCCAGCTCCTCCTGCCTCCCAGT
A_24_P46093	0.1875	0.00065553	4.06	-0.2962	7.03e-01	A_24_P46093	NM_003043	CCAATCCCTAGCAACTGTGACTCTGTATTTAGCACAAGAGAAAGCTGAGAATGTGGGTCT
A_33_P3228558	0.1875	0.00065765	4.06	-0.2989	5.03e-01	A_33_P3228558	NM_199282	CACAGGGGCCTCATACCATATGTCTAAATATTTAAAAGTTATCAATCAAGCTAACAACTG
A_33_P3293798	0.1891	0.00067506	4.05	-0.3209	4.17e-01	A_33_P3293798	NM_198691	TATGTGCCCACCTGCTCTGAGGATTCCTCTTCATGCTGCCAGCAGTCTAGCTGCCATCCA
A_23_P345710	0.1891	0.00067662	-4.05	-0.3229	-0.252	A_23_P345710	NM_152531	GAAGCAAGCACTTGAAGAGAAGGAAGGGGAGAAAGGGTCCCCCTTGCTGTCTGCCTCTGA
A_23_P204286	0.1896	0.00069306	-4.03	-0.3431	-0.801	A_23_P204286	NM_000900	TACTGAAATACATAGGCTTATATACAATGCTTCTTTCCTGTATATTCTCTTGTCTGGCTG
A_33_P3372074	0.1896	0.00069475	4.03	-0.3452	4.75e-01	A_33_P3372074	NM_001031803	GTAGTGGGCTGGGTTTTAAGTTATAAATGTTAACTGCCTCTGGGTGAAAAAGTTTTTAAT
A_23_P19673	0.1896	0.00069831	4.03	-0.3495	1.07	A_23_P19673	NM_005627	GTTTTTATGGACCAATGCCCCAGTTGTCAGTCAGAGCCGTTGGTGTTTTTCATTGTTTAA
A_33_P3289406	0.1898	0.0007057	4.03	-0.3584	4.79e-01	A_33_P3289406	NR_026998	CCAAGATGAAGTCATGCTGTGCTTTGGAATGGTAGATGCTCATTTATGTAAAATCATAAT
A_23_P435636	0.1937	0.00072697	-4.01	-0.3834	-0.779	A_23_P435636	NM_152654	AGGCTGAACTGTCTCTTATAGAATGAGGTCAAAGACACTCCCAGTTGCAGGGAGGGTAGA
A_33_P3215640	0.1948	0.00073789	-4.01	-0.396	-1.53	A_33_P3215640	NM_153370	AGGGACGAGGGAAGGAAAGTAACTCCTGACTCTCCAATAAAAACCTGTCCAACCTGTGGC
A_32_P83845	0.1949	0.00074538	4	-0.4045	5.64e-01	A_32_P83845	NM_001040708	GGGCTATAAAATATCATTTTTCAGGTTTATTCTTTTAGCAGGTGTAGTTAAACGACCTCC
A_23_P90659	0.195	0.00075244	-4	-0.4124	-0.285	A_23_P90659	NM_014713	TGCAGAGGCAAGAAAAATATTTGACATTGTGACTTGACTGTGGAAGATGATGGTTGCATG
A_33_P3341787	0.2011	0.0007889	3.98	-0.4523	2.62e-01	A_33_P3341787	AF050145	TCGGTGGGAAAAGTCTTTCACCCTGGTACTGCTCCACGTCCAGAGTCTGGGTTCTCTTGG
A_23_P126908	0.2011	0.00079608	3.97	-0.46	5.51e-01	A_23_P126908	NM_003820	GGATACCACATCGGAAGTGATTTTCTAAATTGGATTTGAATTCGGCTCCTGTTTTCTATT
A_33_P3279841	0.2011	0.00080286	3.97	-0.4671	5.44e-01	A_33_P3279841	NM_015133	TTTGGCCCTGCAAGCAAACCCACATATCTGCTCTGTATGTAATAAATGTCTTAACGTCGT
A_23_P422831	0.2011	0.00080408	3.97	-0.4684	6.49e-01	A_23_P422831	NM_004816	GAGGATTATTGTTGATTCCATTTACTCATGCTTGCAAAACTAGAGACCCCTAAGGCAGAA
A_33_P3320197	0.2013	0.00081217	-3.97	-0.4769	-0.373	A_33_P3320197	NM_001002919	GACTCTTCCATAAGTCCTTTGAGTTTTGTATGTTGTTGACAGTTTGCAGATATATATTCG
A_33_P3348239	0.2028	0.00083781	-3.95	-0.5031	-0.732	A_33_P3348239	NM_000138	TTCAGAAATCATGTCTGTAAATTAGATGAGCCAAAATAAAGGACAATTGGGTTGATGCTG
A_33_P3408953	0.2028	0.00084763	-3.95	-0.5129	-0.333	A_33_P3408953	NM_199127	ATCACACCCAGATCGCATCCACCTTCATCGCTGTGGTGCAAGCCATCGTCCGCACGGCTG
A_33_P3422822	0.2028	0.00085578	-3.94	-0.521	-0.608	A_33_P3422822	NM_020435	TCCTCCCTAATTCAGACCCAGCCTCAAGAGGAAAGGGAGTAAAATAAAACTAACTTGTTT
A_23_P108662	0.2028	0.00085759	3.94	-0.5228	4.14e-01	A_23_P108662	NM_006302	GGCTTCTGGCTTTTGCCCCCAGCCCCTTGGATACCAGTAATTCAAACCTTCCTCATTTCA
A_33_P3287472	0.2028	0.00085971	-3.94	-0.5248	-0.33	A_33_P3287472	NM_001007533	ACCTGGAATGCGTGAAGCTGCTGGTCAAATACGGGGCTGACATTCACCAGCGAGATGAGG
A_23_P378690	0.2028	0.00086595	-3.94	-0.5309	-0.566	A_23_P378690	NM_001008495	GCAGAGAAAAGGAGAGTTTTACATAGACCCCAGGAAAAACAGTACTAACCTGGTTGATGG
A_33_P3540143	0.2028	0.00086807	3.94	-0.533	4.37e-01	A_33_P3540143	NM_014339	TAAATAATGACATAGTTCCAGTTGATGGCCAAAGCCACAGCTAACGAGAGGCAGAGAGAG
A_33_P3386686	0.2072	0.00089377	3.92	-0.5576	8.42e-01	A_33_P3386686	AK124538	ATGTGGCCTCTCCAGCATGACCCTGTCTGCATGTCGCCTCTCCAATGTGACCCTATCAAA
A_23_P415706	0.2077	0.00090363	-3.92	-0.5669	-0.877	A_23_P415706	NM_198827	GAACTATCTTTAGTTTAGATGGAATTATTTGTTTTTAATTGTTGCCGTATTCATCTATAT
A_23_P204079	0.2123	0.00094344	3.9	-0.6033	6.61e-01	A_23_P204079	NM_003717	CTTGATATGTCTGCATGCAAGGTCCACACCCAAAAGTGTCAATGTTTGCCCCCCAAATAA
A_23_P151529	0.2123	0.00094773	-3.9	-0.6071	-0.67	A_23_P151529	NR_023938	ATCTTTTGCAGAAACCTTACTATTATAACTTGCTACTCTCCAGATACCAATTCTTCATGC
A_33_P3404814	0.2123	0.00094867	-3.9	-0.608	-0.749	A_33_P3404814	NM_020988	GGTTTCACTTTTAAGACTTAATCTTTGCTGAAGAAGACCAGTCACAGCCATTTCAAATAA
A_33_P3223607	0.2123	0.00096604	3.89	-0.6233	4.12e-01	A_33_P3223607	NM_001144026	GAGATGGAGGACTGATCCTGGAACGTGAAGCAGCTTTCAATAAACCAGCTCCTGGGGATG
A_33_P3357753	0.2123	0.00097001	3.89	-0.6267	3.94e-01	A_33_P3357753	NR_024397	GCTATTGAGGCAACATGAGATGGACATTAATCGACTAAGTAAAAAACAGATTTCTTGAAG
A_33_P3405384	0.2123	0.0009798	3.88	-0.6352	3.28e-01	A_33_P3405384	NM_173518	CAGGTCTGACTAGTGACTATGAGAATGGAGCTATTTAGAGTTGATTTAAAAGAAAACACT
A_33_P3375133	0.2123	0.0009867	3.88	-0.6411	7.91e-01	A_33_P3375133		TGAATTCAAAGAGTTCCAGGACTTCTCCAGTCTGCCCGACACTCGCAGCGTCGCCTCTGA
A_32_P755542	0.2123	0.00099129	3.88	-0.6451	3.44e-01	A_32_P755542	NM_138807	GGTGGCTGAGGAAAACATCCTGATTTTGCTTGCTTTTATATATGTTATGTGTAGATGAAT
A_33_P3305840	0.2123	0.00099443	-3.88	-0.6477	-0.244	A_33_P3305840	NM_001195446	AGTGTGGCGAAAAGGGACATTATGCTTATGATTGTCATCGTTACAGCCGGCGAAGAAGAA
A_33_P3422289	0.2123	0.0009978	3.88	-0.6506	6.28e-01	A_33_P3422289		CTTTGCATGGTTCTCTTGATGTGAAATCATCTATATAGCCCCAGAATTGGAAAAGAAAAA
A_33_P3413048	0.2147	0.00101675	3.87	-0.6665	4.61e-01	A_33_P3413048	NM_017514	TGCATGAGTTTTTCTTTGTTCATGGAATGTTTTTTCCTGATTAAATGTTGGGGAAATGCC
A_24_P876522	0.216	0.00103035	-3.86	-0.6777	-0.408	A_24_P876522	NM_001008397	TAACTCCTGATCATCTTACAGCAGACATAACAACAGAGTGTTAGAGACTGGAATAAATAT
A_23_P143178	0.2173	0.00104434	3.86	-0.6891	4.03e-01	A_23_P143178	NM_004139	AGGAAGGATATCTGAACTTCTCCATCACAGATGACATGATACCGCCTGACTCTAATATCC
A_33_P3248900	0.2187	0.00106111	3.85	-0.7025	7.34e-01	A_33_P3248900	NR_028324	CCCAGCTAGCTCTTGCCTCACTGCGGCCTCCCCAGTCCAAAGCTCCTGCCTTTCGGCCAC
A_23_P366726	0.2187	0.00106653	3.85	-0.7068	3.49e-01	A_23_P366726	NM_201520	GCCAACCTGGGTATTAGAAATCTAATTCCTCTCAAATATTTGCCTTGGGAATGCTCCCGG
A_23_P137665	0.2201	0.00108098	3.84	-0.7182	2.38	A_23_P137665	NM_001276	TCCTTATCAAAGGACACCATTTTGGCAAGCTCTATCACCAAGGAGCCAAACATCCTACAA
A_23_P254688	0.2211	0.00109341	-3.84	-0.7279	-0.487	A_23_P254688	NM_023943	CGACTATAGAGACACTGGGATGGTCCTTGTTAACCCCTTCTGTCAAGAAACACTGTTTGT
A_24_P556318	0.2218	0.00110482	3.83	-0.7366	5.73e-01	A_24_P556318	NR_026576	TCCAGAGACTCACAGGAGACCATGCAGAGGATTCGCTGGCTGGCCAGGCTACCAACAAAT
A_33_P3274069	0.2253	0.00112995	3.82	-0.7556	2.60e-01	A_33_P3274069	NM_012265	CAGGAGAGGCCCCCCAGCATGCTGCCCTAGTACGTGTTTAGAATAAAAACCAGTTTGTTT
A_33_P3412687	0.2306	0.00116835	3.81	-0.7839	6.23e-01	A_33_P3412687		CCCTGTCTGCATATGGCCTCTCCAGCGTGACCCTGTCTGCCTGTTGCCTCTCCAGTGTGA
A_23_P403424	0.2306	0.00117313	3.81	-0.7873	6.01e-01	A_23_P403424	NM_005090	CTGTTTTCCCTTCTGCGCTACCTTGAGTAGTTGGAGCACTTGATACATCACAGACTCATA
A_23_P68487	0.2316	0.00118591	-3.8	-0.7965	-0.72	A_23_P68487	NM_001719	GCGAAAGGAAAATTGACCCGGAAGTTCCTGTAATAAATGTCACAATAAAACGAATGAATG
A_33_P3708413	0.2349	0.00121531	-3.79	-0.8172	-1.28	A_33_P3708413	NM_003480	AATTACTTCCGACTTCCTCCCTGTGAAAATGTGGATTTGCAGAGACCCAATGGTCTGTGA
A_33_P3259443	0.2349	0.00124204	-3.78	-0.8355	-1.14	A_33_P3259443	XR_109175	CCCTGTGTGTCATTCTTTTACCAGGCAGCCGAGAACAGGGAGATAAACATCATCATCTAA
A_23_P345692	0.2349	0.00125873	-3.77	-0.8468	-0.835	A_23_P345692	NM_138284	GTGACATCTTTGCCAGTTGTCAGAAGAATCCAAGCAGGTATTGGCTTAGTTGTAAGGGCT
A_33_P3278755	0.2349	0.00126032	-3.77	-0.8479	-1.62	A_33_P3278755	NM_001032377	CCAGGGTTGATTCCAGTCAATTCAGCAGGCCTAGATTTATTTTCCTTAATAATAATTAAG
A_33_P3408918	0.2349	0.00126125	3.77	-0.8485	2.18	A_33_P3408918	NM_030754	CTATGTCCAGAGAAGCTGAGATATGGCATATAATAGGCATCTAATAAATGCTTAAGAGGT
A_24_P161293	0.2349	0.00126394	3.77	-0.8503	5.45e-01	A_24_P161293	CR936830	AACAGTACCTTGGCTTGGCTCTTGACGTGGACAGTGAGTACCTTACTATGAAGGTGATAA
A_23_P168306	0.2349	0.00127475	-3.77	-0.8575	-0.383	A_23_P168306	NM_003931	TTAGCAGTATCCCCTTCCCACTTATATATTGTGTGATATGATTTTGCTTGCCTATAGGAG
A_23_P34396	0.2349	0.00127745	3.77	-0.8593	4.17e-01	A_23_P34396	NM_020317	TCTAGGAACAACCAACATTGACTTGCCAGCTAGTCTCAGAACTGTTCCTTCAGCCAAAGA
A_23_P389281	0.2349	0.00128619	-3.77	-0.8651	-0.626	A_23_P389281	NM_000522	TTAGTGATTCATCTTCACAGCACATTTTTAATCAAGCAGTTATTTCAACCAGCACATTCG
A_33_P3262575	0.2349	0.00131345	3.76	-0.8828	3.73e-01	A_33_P3262575	NM_018842	GACCAGCTCAGCCATTTAAAATATTTTCTTCCTATTCTGTTCAAGAAACAGTAAACTTGG
A_23_P43684	0.2349	0.00131385	-3.76	-0.883	-0.41	A_23_P43684	NM_017637	TCCCTTCACTTCAGTAGATTAGTCTCAGAATGGACACTACAAATGCCAGCTCTCACCAGA
A_33_P3306048	0.2349	0.00131465	3.76	-0.8836	4.91e-01	A_33_P3306048	NR_002221	CTCTTCTGCCTGTTCATCTCTACAAAGTTGAGAGATGATAAATACAAAAAGTCACATGTA
A_33_P3390868	0.2349	0.00131607	-3.76	-0.8845	-0.693	A_33_P3390868	NM_133477	ACAATTATACACATTGGAAAGGGCCAACCTATTAGGGCTCAAGTATGTATATGCAAAAAA
A_33_P3593774	0.2349	0.00131813	3.75	-0.8858	6.86e-01	A_33_P3593774	NM_003629	CTGATGGTGCATTCTTAATTCGTGAGAGTAGCAAGAAAGGATGCTATGCTTGCTCTGTGG
A_23_P60166	0.2355	0.00134576	-3.75	-0.9033	-0.288	A_23_P60166	NM_022783	GGGGGTAGTTAGGGAGAGACTACATGAAATGGTGTGCCCCTATTTTCTTTCTGATCCTAA
A_32_P210642	0.2355	0.00135785	3.74	-0.9109	5.41e-01	A_32_P210642	NM_201446	AAGGCCAGGTGGGCCCTCAGCTGAGGGAAGGTACGAGCTCCCTGCTGGAGCCTGGGACCC
A_23_P70897	0.2355	0.00135928	3.74	-0.9118	3.29e-01	A_23_P70897	NM_017984	TGTTCATTGGCTATGAGGTTCAAATGTGTGTGGTGCAGTTTCTGTGTTAATAAAGCAGGT
A_23_P412577	0.2355	0.00136121	3.74	-0.913	4.23e-01	A_23_P412577	NM_173505	TAAACCACGAGAAATATATAGGCTTGTCTCTTTGGTCTTTTATTTTGGCTCTATTGTTGG
A_24_P67898	0.2355	0.00136318	3.74	-0.9142	8.22e-01	A_24_P67898	AF307332	AGATATCTGAAACACCGTGAGCTTAGAATAAAAAGTAGTAGTGAGATTTTCCACTTTCTG
A_23_P125233	0.2357	0.00137231	-3.74	-0.9198	-1.4	A_23_P125233	NM_001299	AGAGACCCAGCGGACACACGCGGTTTCGTTTGCAGCGACTGGCATACTATGTGGATGTGA
A_33_P3298567	0.2359	0.00138168	3.73	-0.9256	2.79e-01	A_33_P3298567	AK309421	TTTTCCACCCTCAGGTTTCTCACTTTACCAGGACGGCCTGTGTGACTTGTGGCCTCCGAG
A_33_P3381647	0.236	0.0013905	3.73	-0.931	6.10e-01	A_33_P3381647	NM_001626	TTGACTTGGTTTCGTTTGGTGCTACCAGCAGTCCTGTAATAAACTAGCTATCCATCTGTA
A_23_P48198	0.2379	0.00142349	-3.72	-0.9508	-0.493	A_23_P48198	NM_031302	ACTCAATCACCATAGCTGATATAACTCTACCCTTAAAATATTCCCTGTATAGAAATGTGG
A_24_P253755	0.2379	0.00143962	3.72	-0.9603	3.01e-01	A_24_P253755	NM_004278	TGTGATGTTTTGGGGATTCCACTCTCCAGTGTAATGATTATTGACAACAGGGATTTCCCA
A_33_P3807593	0.2379	0.00144954	3.71	-0.9661	3.28e-01	A_33_P3807593	NR_039980	TTTACAGAAGCCTTTACCCATCCTGAGACTCAGTTCTGCTGTTGGTCTTCAGAGAAGTGT
A_23_P58819	0.2379	0.00146401	3.71	-0.9745	3.07e-01	A_23_P58819	NM_022897	TCTGGGTCTCAGGACAGTGATGTTGGCTAGCCCAGGGGAATGTATTTTTCAAAACATACA
A_23_P144005	0.2379	0.00146746	3.71	-0.9765	6.10e-01	A_23_P144005	NM_015931	TCCAACCCCTTATACAGCTCCTCTGGTGGAATCCATGACTCATATGTTTAACCTACAATA
A_33_P3367917	0.2379	0.0014734	3.71	-0.9799	4.09e-01	A_33_P3367917	BC011636	CTCTAAGTTTGTAAACATGGATGTGTGCAAAGATTTTAGCTCTAAGAATGTTTGTCAGTG
A_32_P47988	0.2379	0.00147608	3.71	-0.9815	3.13e-01	A_32_P47988	NM_001221	GGATCATCAGAAACTAGAAAGAGAAGCTAGAATCTGCCGTCTTTTGAAGCACCCTAATAT
A_33_P3217490	0.2379	0.00147629	-3.71	-0.9816	-1.37	A_33_P3217490	NR_038388	GTGGTTTCATTTTCCCTGATTTTGATTTTTCTTATGGGGAACCTGTGTTGCTGCATTCAA
A_24_P331655	0.2379	0.0014853	3.7	-0.9867	4.56e-01	A_24_P331655	NM_001040715	TAGTTTTCCCATCTGTAAAACTCAGAAACGCAGTTGGAAAGTCCTTATTCATTTAGTAAG
A_33_P3299416	0.2379	0.00148538	3.7	-0.9868	5.97e-01	A_33_P3299416	NM_181711	GGGGTGGGGACAGCACAGACTGTTCCACCGTTGTGCATATTGTTGCTTCTGAACCACAAA
A_23_P12363	0.2416	0.00151695	-3.69	-1.0046	-0.553	A_23_P12363	NM_005012	ATGCACAACTTTTGTAAATGTGGTATACAGGACAAACTAGACGGCCGTAGAAAAGATTTA
A_23_P7313	0.2421	0.00153328	3.69	-1.0136	1.78	A_23_P7313	NM_001040058	TTCCACAGCCATGAATTTCACAGCCATGAAGATATGCTGGTTGTAGACCCCAAAAGTAAG
A_23_P52610	0.2421	0.00153712	3.69	-1.0157	4.75e-01	A_23_P52610	NM_000107	CAAGGGCCCCTCTGTATCTAGCCTGGAACCAAGGTTATCTTGGAACTAAATGACTTTTCT
A_23_P145096	0.2429	0.00155041	3.68	-1.023	1.6	A_23_P145096	NM_005084	AAAGCATTTAGGACTTCATAAAGATTTTGATCAGTGGGACTGCTTGATTGAAGGAGATGA
A_24_P277934	0.2441	0.00156947	-3.68	-1.0334	-0.637	A_24_P277934	NM_000089	CCTGAAAAAGGCTGTCATTCTACAGGGCTCTAATGATGTTGAACTTGTTGCTGAGGGCAA
A_23_P40174	0.2441	0.00157522	3.68	-1.0364	1.94	A_23_P40174	NM_004994	TGGAGGTGGGCTGGGCCCTCTCTTCTCACCTTTGTTTTTTGTTGGAGTGTTTCTAATAAA
A_33_P3311979	0.2463	0.00160522	-3.67	-1.0524	-0.262	A_33_P3311979	NM_153813	AACATCAAGTTCAGCAGCCTGTCCACCTTCATCGCCCACAAGAAGTATTACTGCTCCTCG
A_33_P3419113	0.2463	0.00160914	-3.67	-1.0545	-0.549	A_33_P3419113	NM_001002758	AAGAGGAGCACACCACACCAGAAACAGACATCTTGCAGTGTTTCACTGTCTCAACCTTAT
A_23_P60296	0.2463	0.00161589	3.67	-1.058	2.98e-01	A_23_P60296	NM_012383	GAGATCTAAAACTTCTGTTGCTTTTGCCATTCCAAAACTTTGTCTTTGCCAGAAAAGTGT
A_33_P3385351	0.2502	0.00166292	-3.65	-1.0823	-0.989	A_33_P3385351		AGATGCTCACCTGTTGGTGTGGGTGCTGCTTCAGGCTGTCAGATGCTCACCTAGAGTGTG
A_23_P253350	0.2502	0.00167933	3.65	-1.0906	8.87e-01	A_23_P253350	NM_020130	TGAAAAAGTGCACCACATGGATGTTAAGTAGAAATTCAAGAAAGTAAGATGTCTTCAGCA
A_32_P129752	0.2502	0.00168135	-3.65	-1.0916	-0.819	A_32_P129752	NM_001017970	CTGTTCTCTGGGTTTTTGAGAGAGAATAAAGGTTATGTTTGTCTTACCTTTGTTATCGAG
A_23_P85269	0.2502	0.00169755	-3.64	-1.0997	-0.498	A_23_P85269	NM_133378	CTGACAACCCTGATCATCATGGACGTACAGAAACAAGATGGTGGACTTTATACCCTGAGT
A_23_P332908	0.2502	0.00170032	3.64	-1.1011	3.77e-01	A_23_P332908	NM_144982	AAGAACCGTTTGAAAAAAGTTAAAGATGGAGCAAAACCACTTTCCCTGAAATCCGACACT
A_32_P16315	0.2502	0.00170043	3.64	-1.1011	3.81e-01	A_32_P16315	NM_177987	TACTGTGTTCTGACAGCCATGTGTCACTATACGCTTGTTAATTTGTGTCTTCACATCTCC
A_23_P110403	0.2502	0.00171579	-3.64	-1.1087	-0.985	A_23_P110403	NM_014476	AAACATACACTTAGCTATGTTTTGCAACTCTTTTTGGGGCTAGCAATAATGATATTTAAA
A_33_P3254801	0.2502	0.00171881	3.64	-1.1102	5.21e-01	A_33_P3254801	NM_007346	GAGGCAGCAGAGTTGCAGGACGCAGAGGTGGAGTCTTCTGCCAAGTCTGGGAAGCCTTAA
A_24_P926400	0.2502	0.00172752	3.64	-1.1145	4.29e-01	A_24_P926400	NM_001001561	TTTTTCTCAAGTATAACTAGTCCTATGATTTCATAGATGTAGCTTAGGATAAGGCCAAGG
A_33_P3269869	0.2502	0.00175322	3.63	-1.127	2.46e-01	A_33_P3269869	AK093990	AGCCTAGTGCTTGGCACCTCAGGCACACAATAAATATTTATGAAATGGATCTTCTCTGGT
A_33_P3329522	0.2502	0.00175486	-3.63	-1.1278	-0.587	A_33_P3329522	NM_001031692	GATGTTCATGAGCTGAAGAAATTAAACCTCAGCAGCAATGGCATTGAATTCATCGATCCT
A_23_P97860	0.2502	0.00175553	3.63	-1.1281	8.61e-01	A_23_P97860	NM_000235	TATAATTACTTTAGCTGCACTAACAGTACAATGCTTGTTAATGGTTAATATAGGCAGGGC
A_23_P21618	0.2502	0.00175564	-3.63	-1.1281	-0.377	A_23_P21618	NM_015009	TTTTAATGGAACCCTATTTTATAATGGTACGTTACTGAATGTGTTTCATATGCGTGACCG
A_33_P3373139	0.2509	0.00176917	3.63	-1.1346	4.18e-01	A_33_P3373139	AK131107	TATCGCTACTCTGTTTCATAGAAATCCCCATCCATCAAGAAATATGAAAGTTAAGGCTGT
A_32_P475513	0.2512	0.00181693	3.61	-1.1572	5.14e-01	A_32_P475513	NR_003587	CCTGGAAGTCAACTATGGCTCAGCTGACAACCCCCAGACCATCTGGTTTGAGCTGCCACA
A_23_P148121	0.2512	0.00182895	3.61	-1.1627	3.53e-01	A_23_P148121	NM_001099409	TGCAGGAGGAGGTGCTGATCCAGGAGTGGTTCACCCTGGTCAACAAGAAGAACGCTCTCA
A_23_P93938	0.2512	0.00183147	-3.61	-1.1639	-0.654	A_23_P93938	NM_001146334	TGGGCTTGCGGCAGATTCAGGGAGTCACCAGGATCACCATCCAGAAGTCCAAGAACATCC
A_33_P3344204	0.2512	0.00183826	-3.61	-1.167	-0.982	A_33_P3344204	NM_024786	GGGAAATGGGAGCATAGTACTGGGAAACCCCAGACCTGGATTCTGAGTTTTTCAGCCTAG
A_23_P304897	0.2512	0.00183935	-3.61	-1.1675	-0.529	A_23_P304897	NM_000623	GCCCTATGCATGGTGTAGATGCCCTGATAAAGAACATCTGTCCTGTGAAAGACTCAATGA
A_33_P3357337	0.2512	0.00184078	3.61	-1.1682	3.49e-01	A_33_P3357337	BC026272	CTGTGCCAATGCAGTGGCATTGGTACCAAGGTAAAATACAAGGAATTTAAGGACAAAAAA
A_32_P133840	0.2512	0.00184399	-3.61	-1.1697	-1.56	A_32_P133840	NM_014858	CTTCCATTCCATTTAGCCTTTGGATCATCCTGGCTGGGAGAAGTGGGACCGAGCCACCCA
A_33_P3414362	0.2512	0.00185688	3.61	-1.1756	2.71e-01	A_33_P3414362	NM_032582	TGTGTCACATAGTTCTGGGGTTAAGACCAGCTACTCCGGAAGAAGAAGGACAAATTATTA
A_23_P154065	0.2512	0.00185786	3.6	-1.176	4.87e-01	A_23_P154065	NM_006000	ATTATGAGGAGGTGGGCATCGACTCCTATGAGGACGAGGATGAGGGAGAAGAATAAAGCA
A_33_P3218905	0.2512	0.00186035	3.6	-1.1771	3.31e-01	A_33_P3218905	NR_002806	CTTACCTATATTTTCTAAATACTGTGCAATGGGTGGGAAATGAAAAGCAAGTGTTTAGGT
A_24_P403244	0.2512	0.00187674	3.6	-1.1846	6.83e-01	A_24_P403244	NM_178238	GCAAAGGGCACTCAGAATCATGGCACCTAAGTCTGGACACTGCCATCAGGGTTGCATTGG
A_33_P3365087	0.2512	0.00187704	3.6	-1.1847	4.89e-01	A_33_P3365087	NM_001130404	GCTGTTGTTGGCTGGTTTTCACTCCTTTGTAAACGTCCAAATAAAATACAGATAACTTTT
A_33_P3227920	0.2513	0.00191013	-3.59	-1.1995	-0.624	A_33_P3227920	NM_004696	CCTTACTTAGTGACTGGAATGGTATATGCTCCCTCCAAAAGTTTATCTTTGTTTATTGAT
A_24_P354715	0.2513	0.00192565	-3.59	-1.2063	-0.867	A_24_P354715	NM_002526	TCTGCCTCCAAATCTGAACAGTCACTGTAAATCATTCTTAAGCCCAGATATGAGAACTTC
A_32_P14850	0.2513	0.00193169	3.59	-1.209	6.60e-01	A_32_P14850	XM_003118720	AAGACACCTCCCGAATGTCTCCTTCATCCCCTTCCACCCTCAGTGGATGATAATATCAAG
A_23_P155556	0.2513	0.00193535	-3.59	-1.2106	-0.268	A_23_P155556	NM_001040199	AAAGTTCTGGCTGTCCATTAACCTCCAACTATGGTCTTTATTTCTTGTGGTAATATGATG
A_23_P114774	0.2513	0.0019548	3.58	-1.219	3.46e-01	A_23_P114774	NM_006556	CAGGAAACCTCTGGAGACCTCATTTTCTCCATGGGGAAGACAGCCATGCTCTTCAGGAGG
A_24_P204675	0.2513	0.00195987	3.58	-1.2212	4.43e-01	A_24_P204675	NM_001135865	ATAATCTCAAGACACGTGCCGAGTGTTGCTCCATCCCCTTCCACCCTCAGCGGATGATAA
A_33_P3347663	0.2513	0.00196262	-3.58	-1.2224	-0.751	A_33_P3347663		ATAGAGGAAGGGAGGGCGCAGGTTGGAGTCAGGTCCAAACAGTCCCTATCGCCACTTTTG
A_23_P27677	0.2513	0.00196644	3.58	-1.2241	3.93e-01	A_23_P27677	NM_001571	AGGTCCCCAAGGACAAGGAAGGAGGCGTGTTTGACCTGGGGCCCTTCATTGTAGATCTGA
A_24_P237036	0.2513	0.00197404	3.58	-1.2273	4.70e-01	A_24_P237036	NM_003807	ATGAACGCCTGGTTCGACTGCGTGATGGTACCCGGTCTTACTTCGGGGCTTTCATGGTGT
A_33_P3210203	0.2513	0.00197454	3.58	-1.2275	4.62e-01	A_33_P3210203	NM_032451	GCAGCTCTGTAAATCTGTGCACATGGCCACTCTTGGCCTAATAAAGGAGGTCTCACAGTC
A_23_P35564	0.2513	0.0019796	3.58	-1.2297	5.91e-01	A_23_P35564	NM_015490	TTTGCATTTGTGGCACTGTCTTTGATGCAGTGATGTACTTAATGGTGCAATAAAGCTGCT
A_23_P52761	0.2513	0.00198322	3.58	-1.2312	8.12e-01	A_23_P52761	NM_002423	TTGGGTATGGGACATTCCTCTGATCCTAATGCAGTGATGTATCCAACCTATGGAAATGGA
A_33_P3344831	0.2545	0.00203503	-3.56	-1.2531	-0.528	A_33_P3344831	NM_018004	CTACTATTTGTAACTCCTTGACCATGGAATTATACTTGTTTATCTTGTTGCTGCAATGAG
A_33_P3365747	0.2545	0.00205381	3.56	-1.2608	8.39e-01	A_33_P3365747	NR_026999	GGCCTCTCCAGGCCCAGCTCCAGCCTCCCGGCGGCCTCTGCAGGCCTAAGTCGTCCTTAA
A_24_P171058	0.2545	0.00207407	-3.56	-1.2691	-0.484	A_24_P171058	NM_001008495	CCTCATCTACTAAAGTACAAAGGAATTCTTTGGAAGCAGATTATTCTAGTCTTATGCTAG
A_24_P729905	0.2545	0.00207813	3.56	-1.2708	4.18e-01	A_24_P729905	NM_001077685	AGTTTAACCTTTCTGCCAATCCAGAGGCAAGCACAATATTCCAGAGGAACTCTCAAACAG
A_24_P296808	0.2545	0.00208139	3.56	-1.2721	7.40e-01	A_24_P296808	NM_018215	GGCTTCGTTGTGTTAACAAGTTGACACCATGACTAGTAAATGTAAACGTGTATGTATAAA
A_33_P3292179	0.2545	0.00209181	-3.55	-1.2763	-0.645	A_33_P3292179	NM_080283	GAAATACCTGATGTAGATGATGGGTTGATGGGTGCAGCAAAGTACCATGGCACATGTATA
A_23_P98057	0.2545	0.00209205	-3.55	-1.2764	-0.282	A_23_P98057	NM_001005368	ACAAAAATCCCCAGATTCGAAGACACTACAGGAAGATTCACCTGGAGTGAGACAAAGGGT
A_32_P75792	0.2545	0.00209969	3.55	-1.2795	4.80e-01	A_32_P75792	NM_001014980	AGCTGCAGGCTGGACAGTACGCTTCTGTGTTTGTGGACAATGGCTCCGGGGCCGTCCTCA
A_33_P3256500	0.2545	0.00211011	3.55	-1.2837	3.87e-01	A_33_P3256500	AK095017	TACAAATAAAGGGTCCAAGTTTTATTTGTGATTAGCATAAGGAATATGCTGACAGCAGCT
A_32_P83465	0.2545	0.00213017	3.54	-1.2917	5.20e-01	A_32_P83465	NM_001039703	GTCTTGCAGGACTCACTGGATAGATGTTATTCGACTCCTTCAGGTTATCTTGAACTGCCT
A_23_P425502	0.2545	0.00214866	3.54	-1.299	4.09e-01	A_23_P425502	NM_017613	TGAGGAAAAAAGCCTTCTAGCAAGGAAATTCAAGATTCTTGAAGTTGAAGGAATATACTG
A_23_P45324	0.2545	0.00215017	-3.54	-1.2996	-0.49	A_23_P45324	NM_021637	GGGGGGTTGTGTGGGAAGAGTACTTATTATTGTGTTTTCTTCAGTGTAATTGTTCTTGGT
A_23_P12082	0.2545	0.00215195	3.54	-1.3003	8.39e-01	A_23_P12082	NM_001025199	ATGATGTGAAGAGTATGGAGACCAAGGTTCAGTTCTTAAAGAATTTAAACCTGGGAGGAG
A_23_P33326	0.2545	0.00215227	-3.54	-1.3004	-0.729	A_23_P33326	NM_000679	CTCCTTGTACTTCACTGAAGGATGGCACTTTGGTGGGGTTGGAAACAAAGTCGACATTAA
A_33_P3227472	0.2545	0.0021537	3.54	-1.301	6.96e-01	A_33_P3227472	NM_138432	CTCCTGGACTGCTTCTTTTGGCTCTCCGACAACTCCGGCCAATAAACACTTTCTGAATTG
A_33_P3321130	0.2545	0.00215731	3.54	-1.3024	4.22e-01	A_33_P3321130	AK125506	CCACACCTGCTTTTCCAGACTTCCTTCTAGAATTCCAAAGAAATGTAAATAAATATAAGG
A_23_P403521	0.2545	0.00216916	-3.54	-1.307	-0.216	A_23_P403521	NM_020192	CCAGTGTGAAGAGTATGTGCTCAAACATCTGAAATCAATCACTCCACCGTCCCATGTTGT
A_24_P135427	0.2545	0.00217717	3.54	-1.3102	3.35e-01	A_24_P135427	NR_036508	AGCTGGAACTGTTCTGTATAAACAAAGGGCAAGGTAATTGCTACATAGATTCTTTTCTTA
A_33_P3384133	0.2545	0.00217871	-3.54	-1.3108	-0.922	A_33_P3384133	NM_001163075	AGCGTGCACTGTTCGTATTTGGAGTTCATGCAAAATGAGTGTGTTTTAGCTGCTCTTGCC
A_24_P333421	0.2545	0.002192	3.53	-1.3159	2.53e-01	A_24_P333421	NM_001099220	AGGAGGTTTTAAAAACCATGTTTAATTCCTAACCTTTTGCTACCTGAATAAAGCAGAGTC
A_24_P241183	0.2545	0.00219968	3.53	-1.3189	4.59e-01	A_24_P241183	NM_013269	AGCTACCTTAATTTGGCGCTTATTTTTCTTAATCATGTTTCTGACAATCATAGTGTGTGG
A_32_P133916	0.2545	0.00220987	-3.53	-1.3228	-0.532	A_32_P133916	NM_017637	AACTGCCTACAGTATGTCTTTTGCATAAAATGCATAAGGGTTTGGGGATGTAAATGGAAT
A_32_P160045	0.2545	0.00221693	3.53	-1.3255	2.14e-01	A_32_P160045	NM_152665	ACGCCACGGATCATTTATTTTTATGAAGCTTTCAAGTCTTTGTGTGCAAGTAAAATGATG
A_23_P156562	0.2545	0.00223081	3.52	-1.3308	2.84e-01	A_23_P156562	NM_206922	CTCCATGGTAGGCCAGAGAGTCTAGACTTTCTCTGCCAATTTTTTCCCTTTCCCATTTCT
A_23_P59452	0.2545	0.00223811	-3.52	-1.3335	-0.271	A_23_P59452	NM_001091	TGCACACCCACCTGATTGGCAACATACACACTCACTTGGTGCACTACCGCGTAGACCTGG
A_23_P152002	0.2545	0.00224422	3.52	-1.3358	7.34e-01	A_23_P152002	NM_004049	TGTAACCATATTTGCATTTGAAGGTATTCTCATCAAGAAACTTCTACGACAGCAAATTGC
A_33_P3322804	0.2545	0.00226601	-3.52	-1.344	-0.466	A_33_P3322804	NM_001018064	TGCCTTTTGGTAATGCTGTTTCTGCTTAAGTTGGCAAGACACTCCAAGTTTGGCATGAAA
A_24_P289260	0.2545	0.00226737	-3.52	-1.3445	-1.04	A_24_P289260	NM_214462	AGCTGGAAATTGAATTTGAGTTTAAACTCCACGTTAAGCTGTCAGCATACACAAACACCC
A_23_P70307	0.2545	0.00227638	-3.52	-1.3479	-0.735	A_23_P70307	NM_022138	TGTGCAAGGTAAAAATCAAGCCTTTGGAGCCACAGAACCAGCTCAAGTACATGCCAATGT
A_23_P38167	0.2545	0.0022851	3.51	-1.3511	4.42e-01	A_23_P38167	NM_022036	TCCAGCCAAATAGTGTTCTCGGGGTGGTGGCTGGGCAGCGCCTATGTTTCTCTGGAGATT
A_33_P3246833	0.2545	0.00228625	3.51	-1.3515	1.65	A_33_P3246833	NM_173843	TGCAAAGTTCCCTACTTCCTGTGACTTCAGCTCTGTTTTACAATAAAATCTTGAAAATGC
A_23_P155103	0.2545	0.002294	-3.51	-1.3544	-0.342	A_23_P155103	NM_000026	CAGCTTGACAAGATGGTGACAGAAAAGGCAGGATTTAAGAGAGCTTTCATCATCACAGGG
A_33_P3412695	0.2552	0.00230995	3.51	-1.3602	5.95e-01	A_33_P3412695		ACATGTAGCCTCTCCAGCATGACCCTGTCTGCATGTGGCCTCTCCAGCGTGACTCTGTTT
A_33_P3253628	0.2558	0.00232416	3.51	-1.3654	3.40e-01	A_33_P3253628	AK093737	CAAAAGGTACCAAAAAGTACAGTAAAATTAACACTTCCGTTACAGGAAATGTATGACGCA
A_23_P398294	0.2572	0.00234578	3.5	-1.3733	4.58e-01	A_23_P398294	NM_003959	GTTAGCATTTCCTCCTGAAGTGTTCTGTTGGCAATAAAATGCACTTTGACTGTTTGTTGT
A_23_P68807	0.2575	0.00237961	3.5	-1.3854	4.30e-01	A_23_P68807	BC021857	CTCCAGCTTTGACCTGGGAAGCTGTTTCAGGCAGGTGGAGAGGATGAGGTTTGAGGAGCA
A_24_P305050	0.2575	0.00238432	3.5	-1.387	4.44e-01	A_24_P305050	NM_145273	TTCCTTGTCTGGAAAGGGTTACTTGCCTATGGGTTCTGGTGGCTAGAGAGAAAAGTAGAA
A_24_P375205	0.2575	0.00239514	-3.49	-1.3909	-1.43	A_24_P375205	AK093577	ATTCCATTCCAGTTTCTGTCCTCCAAAATAGGTTCTGAATTTTTACAAGTTAGAAATGCC
A_24_P307135	0.2575	0.00240592	-3.49	-1.3947	-0.487	A_24_P307135	NM_019105	CAAGTACAAGATGCACCTGTACGGCCTCCACGAGGGGCGGCGCCTAGGCCCGGTGTCTGC
A_23_P380928	0.2575	0.00241601	3.49	-1.3982	4.30e-01	A_23_P380928	NM_001198793	TTGCCTCTGCCCTTTGAAGTCGGAACAATTCCTAGCACCTGTCGGAAGGTCAAGGCCAAA
A_32_P152696	0.2575	0.0024198	-3.49	-1.3995	-0.778	A_32_P152696		CGACAGGCCTCAGGATTTTGTGTTGATCAAGTTCCAAGGAAAAGGAACATCTCGGCCAGG
A_33_P3280945	0.2575	0.00242682	3.49	-1.402	4.49e-01	A_33_P3280945	NR_036473	CTGCCCGGCCACTTTTGTATGATTTCTAATGTATTTGTAATTTACCTAACAAATTGCCTA
A_33_P3262470	0.2575	0.00243312	3.49	-1.4042	2.99e-01	A_33_P3262470	AB464252	ATAAATTGGCCTCTCCTGGAGACTGCCAGAACTTTCTCAAAGTTGTAACATCCAGAGGGA
A_23_P113417	0.2575	0.00243702	3.49	-1.4055	4.36e-01	A_23_P113417	NM_025161	TTCTGGGGTTTGGACTTGGGGTGAGTTTGTAACTGTTGCTGCCACACCACCAGGAGCACC
A_33_P3290354	0.2575	0.00244007	-3.49	-1.4066	-0.701	A_33_P3290354	NM_032532	TCACAGGGTGAAAGAGATGGCAAATGGAGTACGTCAGTCTTCCAAAGAACACCAGAATCT
A_33_P3321781	0.2575	0.0024634	3.48	-1.4146	6.45e-01	A_33_P3321781	XR_109412	GTTCGATTTTTGTTCTGGGGGTGAAGGAGGAAACAGACTGTACTAAAGGACTAAAATAAT
A_33_P3381338	0.2575	0.00247402	-3.48	-1.4183	-0.93	A_33_P3381338	NM_019105	AGTTCTCGGTGCCCTTCACGGAAATGAAGCTGAGACCAAGAAACTTTCGCTCCCCAGCGG
A_24_P406132	0.2575	0.0024864	3.48	-1.4225	4.95e-01	A_24_P406132	NM_002754	GGTTGGGAGAAACTAGCTCTGATCCTAACAGGCCACGTTAAACTGCCCATCTGGAGAATC
A_33_P3292814	0.2575	0.00252308	3.47	-1.4349	2.71e-01	A_33_P3292814	CR747917	CTTTCAGATAGCCGGTGGCTGCCCTTTTAATTTATACTTTTCCAAGATACTGTTATTATT
A_33_P3367642	0.2575	0.00252619	3.47	-1.4359	2.15e-01	A_33_P3367642	NM_033200	TTCACACCAGCCCATCCTGCCCTTTAGATCTGGGCACCAATAAAGGCGTCTTTTGTGCTT
A_33_P3413541	0.2575	0.00253037	3.47	-1.4373	4.21e-01	A_33_P3413541	NR_001575	TGCTAAGTGATCTAGTTGGCTGCTATTACACCTTAGAAATTGAGTTTACACACACACACA
A_24_P160413	0.2575	0.00253571	3.47	-1.4391	5.70e-01	A_24_P160413	NR_026850	CAAAAGTACTGAGGGTCTTAAGTTTGAAGTGTCCAAAGTATAGGGAGGTCTCAATAATAA
A_23_P372308	0.2575	0.00253694	-3.47	-1.4395	-0.411	A_23_P372308	NM_020211	TAGTTGGTCCCTATGTTGGAAGTAAAAAGTGAAGCACTTTATTTTGGTTGTGTTTGCTCA
A_23_P35205	0.2575	0.00254979	3.47	-1.4438	3.33e-01	A_23_P35205	NM_013441	CCACTGCTAGGCCTCAATGTAAATTCAGTTGAAATTTGCAATTCTATCAGCAATTTAATG
A_33_P3237580	0.2575	0.00255375	3.47	-1.4451	3.17e-01	A_33_P3237580	NM_001242791	CATGAGGTTGATGGGAGGATTGAGTTAATATTTATAAAGCATTTCAGACAGTGCCAGAGA
A_33_P3294177	0.2575	0.00255692	-3.46	-1.4462	-1.12	A_33_P3294177	AK124222	ATCAGATACAGCTGGAAACAAGACAGACCCAAATCCCTGGTGCTTATATTCTAGTGGGAG
A_33_P3264528	0.2575	0.00256602	-3.46	-1.4492	-0.325	A_33_P3264528	NM_005523	GTGTTGCAGCACTTATACAGGCAACTGGGCACAAGGAAAATAAAGACGGTGGAAATTTGA
A_33_P3349637	0.2575	0.00256931	3.46	-1.4503	4.67e-01	A_33_P3349637	NM_002587	GGCTTCTGGGGCTGGGTCCCACATGCCCTTGACCCTGACAATAAAGTTCTCTATTTTTGG
A_23_P150365	0.2575	0.00258304	-3.46	-1.4548	-0.236	A_23_P150365	NM_015523	TGTTTCCATTATGACACAGCAGCTCCTTTGTAAGTACCAGGTCATGTCCATCCCTTGGTA
A_23_P94103	0.2575	0.00258448	-3.46	-1.4552	-1.01	A_23_P94103	NM_173833	CAATATGCTTGCCACTCCTTAAATGTCCTAATGATGAGAAACTCTCTTTCTGACCAATTG
A_23_P64990	0.2575	0.00259357	3.46	-1.4582	4.69e-01	A_23_P64990	NM_134424	AAGCAATATAGGCCAGACTTGGTCCTAAGCACCTGCCTCAGCAATTGTCTACATTCAGTT
A_24_P113131	0.2575	0.002597	-3.46	-1.4593	-0.651	A_24_P113131	NM_004758	GGGTGTGGAATGGTGGGGGAATTTGTTTAAAAAGACATTTTATTATAATAAAGTCTATTT
A_33_P3213822	0.2575	0.00260212	-3.46	-1.461	-0.545	A_33_P3213822	NM_001017424	CTGTTCCGAAAATTTATATGGTGGAATGCGCCATGTATAAACTGTGAATTGTATTGACAA
A_33_P3390177	0.2575	0.00264682	3.45	-1.4754	1.18	A_33_P3390177	NR_033929	AGGTTGGCCTCTCCAAGTCCTAAAAACAAAATTATCAAGCCAACCTCCTCCTGAAGTGCT
A_24_P222911	0.2575	0.00264855	-3.45	-1.4759	-0.303	A_24_P222911	NM_001031684	CAGAAATGTCAATGAGACTAAAGTGGTTTTGTAAATCTCAGCTATATTTAGCAACACTCC
A_24_P7584	0.2575	0.00265541	-3.45	-1.4781	-1.31	A_24_P7584	NM_025262	AACCACTTCCATTCCCCAAATACCTGCGCTGCTACCGATGCCTCTTGGAGACCAAGGAGT
A_23_P37391	0.2575	0.00266259	3.45	-1.4804	3.89e-01	A_23_P37391	NM_001144995	AAAGGAGTAACAAACAAGATTGTGATAGTGTCTACTTTGAGCTAGATAAATAAAGGCCTC
A_33_P3382856	0.2575	0.0026711	-3.45	-1.4831	-0.819	A_33_P3382856	NM_133507	TATTTGACTTTATGCTAGAAGATGAGGCTTCTGGGATAGGCCCAGAAGTTCCTGATGACC
A_23_P37598	0.2575	0.00267699	-3.44	-1.485	-0.265	A_23_P37598	NM_012428	TGAAACTGGTGGCAACATGACCTGCTAAAATTTTCTGCTTGGACCTCTTTGGTTCTCTCC
A_23_P34126	0.2575	0.00269144	-3.44	-1.4895	-0.48	A_23_P34126	NM_001711	TGGGGGTCTCTGGGGAACACAGCCAGACATCCTGATGGGGAGGCAGAGCCAGGAAGCTAA
A_24_P319736	0.2575	0.00269439	-3.44	-1.4905	-0.407	A_24_P319736	NM_002398	AGGAGGCATGGAAACCAAAAGGCCGTGTGTTTAGAAGCCTAATTGTCACATCAAGCATCA
A_23_P25445	0.2575	0.00269744	3.44	-1.4914	4.35e-01	A_23_P25445	NM_032130	GGAAGCAGATGGAGGCTGTCTGGAAGACCGAGGTGGCCTCCTCCAGTTACGCAATAGAAA
A_33_P3596355	0.2575	0.00270595	-3.44	-1.4941	-0.292	A_33_P3596355	BG033631	AACACTGCGATGAACGAACACACACCAAGAACAAGCAAGAGACAACAACGAAAACAGAGC
A_23_P46936	0.2575	0.00271771	3.44	-1.4977	7.89e-01	A_23_P46936	NM_000399	AAGAATGTACATAATGTTACCGGAGCTGATTTGTTTGGTCATTAGCTCTTAATAGTTGTG
A_33_P3358740	0.2575	0.00273077	3.44	-1.5018	4.44e-01	A_33_P3358740	NM_145798	CTCTGATGAGGGCGAATTGCTATGACATTCCAAGCTCCAATAAAGACTGTCCCAGACTTT
A_33_P3369190	0.2575	0.00275116	-3.43	-1.5081	-0.324	A_33_P3369190	NM_001177306	TTATTCCGGTGGTTGTCCTGCTGGCCATTGCCATATTTATTCGGTGGAAAAAATCAAGGG
A_23_P151895	0.2575	0.00275524	-3.43	-1.5094	-1.23	A_23_P151895	NM_003613	CACAGGACATAGGCAAGCCTTGATCATAGTTCATACATATAAATGGTGGTGAAATAAAGA
A_23_P76749	0.2575	0.00277398	-3.43	-1.5151	-0.776	A_23_P76749	NM_020692	CCTGTTCTGTTTTTGCTTTTCCTCTTCTTGACCAAAGCATGTGCCACTAGCTGTCCTTGA
A_33_P3258467	0.2575	0.00277512	-3.43	-1.5154	-0.534	A_33_P3258467	NM_178313	GTGTGCTGTCTGTTGGCATGCTTAAAGCACATGTCCATTAAAATTCATTTTGTTCCTTTT
A_23_P103756	0.2575	0.0027985	3.43	-1.5225	3.46e-01	A_23_P103756	NM_002557	TCTGAGGTGGGCACTCACCCCAGGATGGGTAACTTGGGTCTTCAGATGGAAGCTGAAAAC
A_33_P3263538	0.2575	0.00280879	3.42	-1.5256	1.04	A_33_P3263538	AF001893	CAAATATTTTCTCCCATTCTGTGGGTTGTGTTTTCACTTTATCGATAATGTCCTTAGACA
A_24_P324314	0.2575	0.00280939	-3.42	-1.5258	-0.462	A_24_P324314	NM_001008529	TGATGACCAAAGAGGAGCTGGAGGAGGAGCAGAGGATTGAGCTGACCTCTGACCTCACTT
A_23_P115246	0.2575	0.00281206	3.42	-1.5266	7.17e-01	A_23_P115246	NM_003665	ATTGTCCACGGTGCCTGGTGGTATGCATCCTGTTACCGATCAAATCTCAATGGTCGCTAT
A_33_P3293213	0.2575	0.0028148	3.42	-1.5274	3.09e-01	A_33_P3293213	NM_001161616	TCTCCACAAGACACAAGTCCCACAGGCAAGCTTGCGACTCTTCTCCTGGAAAGCTGCCAT
A_24_P396702	0.2575	0.00282763	-3.42	-1.5313	-0.391	A_24_P396702	NM_014880	GCATTCTTGTAGTGAGCAGTGTATGGTCTCTTTTGTTCAGAATTTAAAACTGATAACCAA
A_33_P3441021	0.2575	0.00284658	-3.42	-1.5369	-0.429	A_33_P3441021	NM_001136534	CACACACCCCAAAGGAGTTTCTAAGGAATGGATCCTTGACTTCAGACTGTGAGATCTTTT
A_33_P3271990	0.2575	0.00287394	3.41	-1.545	5.94e-01	A_33_P3271990	NM_012079	TCTCTGTGGAGCGGGGAACGGGACAGTTGTGTAAAAATCCAAAATACAATTCTGACTATG
A_23_P83278	0.2575	0.00287791	-3.41	-1.5462	-0.276	A_23_P83278	NM_016410	CATTGCTCTTTTATTTTTTCCATTAAGAGACTCATTGCTTGGGAAATGCTTTCTTCGTAC
A_33_P3247372	0.2575	0.00288173	3.41	-1.5473	3.11e-01	A_33_P3247372	AK124064	AGAACAGTGTATCCAGTGAAAATATCCTTCAAAGTGAAGGGGAAATAAACACTTTTCCAC
A_33_P3250028	0.2575	0.00288229	3.41	-1.5475	3.40e-01	A_33_P3250028	NM_145245	CTGCCTGTTCACATGTCGCCCAGGCGGGAAAAATGGAAAATAAAGTGTATTTACACAGTC
A_33_P3241596	0.2575	0.00288343	-3.41	-1.5478	-0.681	A_33_P3241596		ATTCCAGTTATTCAGGAGGCTGAGACACAAGAATTCATTTGAACCTGGGAGGCGAAGGTT
A_32_P119033	0.2575	0.00289273	-3.41	-1.5505	-0.513	A_32_P119033	NM_001005473	GGATCTGGTTATTGATACTTTAATAAATGTGGTGTAAAGAAAATCCATGGCTACAGTCTG
A_24_P120907	0.2575	0.00289644	-3.41	-1.5516	-0.339	A_24_P120907	NM_021965	GGATCCTTCCTTGATTACATCAAGTATGTTGGTACATGGGTTTATACAAGTTCCTCTTGA
A_33_P3311653	0.2575	0.00289908	3.41	-1.5524	4.35e-01	A_33_P3311653	AK124569	ATTTGAGTTTCTTCTAGGGAAGAGTCCCAGATTTGATCAGCTCAGGATACCCCCACTATC
A_23_P61406	0.2575	0.00290991	-3.41	-1.5555	-0.6	A_23_P61406	NM_016848	GTGTACATACCTATACATCCTGTACAAATTATCCCTCTATATTTATATTTTTTAAGACTA
A_24_P933011	0.2575	0.00291493	-3.41	-1.557	-0.259	A_24_P933011	NM_001080209	CAAGAACGACGTGGTGGTGGTGAAAGGCAAGCTGAAGCTGTGCTCCATCTCAGGGCTCAT
A_33_P3542911	0.2575	0.00292061	-3.41	-1.5586	-0.483	A_33_P3542911	BF570948	ACACCACAAGCCACGCACAAGCACCGACCAGAAGCGGACAGCGACGACGAGAACACACGA
A_33_P3350553	0.2575	0.00292863	-3.41	-1.561	-1.75	A_33_P3350553		GTCCATTCCATGAGGATAGTGTGTAAAAACACCACCATTTCCAACACTCTTCTCCCTTTA
A_23_P31224	0.2575	0.00294114	3.4	-1.5646	5.42e-01	A_23_P31224	NM_178273	GGTCAGAAGAGCGGCTTCCTCAGGATCTCCAACCTGCAGAAGCAGGACCAGTCTGTGTAT
A_23_P140256	0.2575	0.00294261	3.4	-1.565	4.89e-01	A_23_P140256	NM_000270	CTACTAGCTCTTTGAGATAATACATTCCGAGGGGCTCAGTTCTGCCTTATCTAAATCACC
A_23_P65262	0.2575	0.00294479	3.4	-1.5656	3.35e-01	A_23_P65262	NM_033111	AGCCAAGACTTAACAAGCACTGACTACCGTTCCCTTGAGCTACCATTATCACAAGGGTTT
A_33_P3762913	0.2577	0.00299236	3.4	-1.5792	5.47e-01	A_33_P3762913	NR_039981	TAGGTAGCTGCCCTCCTTGGGCAGCTTTTGACTCCTATGCCAAATTTTAAAATAAAGGCC
A_33_P3361636	0.2577	0.00300597	-3.39	-1.583	-0.686	A_33_P3361636	NM_001190839	GGGTCAAAGGAGAGTCAACATATGTGATTGTTCCATAATAAACTTCTGGTGTGATACTTT
A_24_P77968	0.2577	0.00300627	-3.39	-1.5831	-0.4	A_24_P77968	NM_001458	AATGTCACCTACACTGTCAAGGAGAAAGGGGACTACATCCTCATTGTCAAGTGGGGTGAC
A_33_P3238479	0.2577	0.00300805	3.39	-1.5836	3.20e-01	A_33_P3238479		TGTTTTAAGATGGTTTACAAGGAAGGAGTACGCTCAGTAGGAGAAGATAAAATACGTGAA
A_23_P158318	0.2577	0.00300914	-3.39	-1.5839	-0.356	A_23_P158318	NM_004560	GAGGTTCCTGACAACCGATCTGGTCTGTTGGTTTGAGGATGAAGGGGCTCCATTTCTGCT
A_24_P92183	0.2577	0.00302112	3.39	-1.5873	4.16e-01	A_24_P92183	NM_001124756	TGGAGATTGACAACTCAGAGCTGTTGCTCATGCTGGAGTCTCCAGAATCCCTCCATGCCA
A_23_P74088	0.2577	0.00302902	-3.39	-1.5895	-0.944	A_23_P74088	NM_006983	GCTGCGGCCAGAAGATCCTCCACAAGAAAGGGAAAGTGTACTGGTACAAGGACCAGGAGC
A_23_P334608	0.2577	0.00303676	3.39	-1.5916	3.45e-01	A_23_P334608	NM_000181	TGTGGTCATCTATTCTAGCAGGGAACACTAAAGGTGGAAATAAAAGATTTTCTATTATGG
A_33_P3310989	0.2577	0.0030456	3.39	-1.5941	2.09e-01	A_33_P3310989	NM_014847	TGTCCTCAAATTTAATGGATTAATGTGTCTTGTATATATAAAAAGAAAACCTCTACCTTC
A_23_P171074	0.2577	0.00305443	-3.39	-1.5965	-0.473	A_23_P171074	NM_004867	CTAGTTGCTGTGGAGGAAATTCGTGATGTTAGTAACCTTGGCATCTTTATTTACCAACTT
A_33_P3250939	0.2577	0.00305456	3.39	-1.5966	3.51e-01	A_33_P3250939	NM_138453	GTACGCATTCAATTCTTGGGAGCTTTCCTGTTTAATATGTGGCAAATATGTGATCTTAAA
A_23_P339954	0.2577	0.00305795	3.39	-1.5975	4.28e-01	A_23_P339954	XM_003118719	TCAAGACACCTCCTGAGTGTCTGCTCACTCCCCTTCCACCCTCAGTGGATGATAATATCA
A_23_P391275	0.2577	0.00306459	3.39	-1.5993	4.67e-01	A_23_P391275	NM_013441	TAAATTATGATTTACTCTGTGCTGTTTCCAAATTGGGACCAGGAGAGAAATATGAACTTC
A_24_P12397	0.2579	0.00307576	3.38	-1.6024	1.32	A_24_P12397	NM_018965	GTGGCACTCTCACCATTACGCTGCGGAATCTACAACCCCATGATGCGGGTCTCTACCAGT
A_32_P460973	0.2585	0.00309422	3.38	-1.6075	5.26e-01	A_32_P460973	NM_005516	CTTCCTCACACTGACCTGTGTTCCTTCCCTGTTCTCTTTTCTATTAAAAATAAGAACCTG
A_33_P3271121	0.2585	0.00310073	3.38	-1.6093	2.69e-01	A_33_P3271121		CCTGCTTATTCTTTCCAAGTTAGTAGGCAGATTGGAACTATAGAATTTATCCGTGATAAT
A_23_P164814	0.2604	0.00314028	3.37	-1.62	2.67e-01	A_23_P164814	NM_024323	TTGCAAATTTTAGGGTCCTGAGCCAAGTATGGATGGTTCAGAATTTGTTTCTTTCCTGGA
A_33_P3347132	0.2604	0.00314232	-3.37	-1.6205	-0.296	A_33_P3347132	NM_014285	AAAGCCAGAAATAATGGAGGAGATTGTGATGGAAACACGCCAGAGGCTTTTGGAACAGGA
A_24_P59667	0.2613	0.0031661	3.37	-1.6269	6.60e-01	A_24_P59667	NM_000215	TGAGGCCTCAGTACAGAGGGGGCTCTGGAAATGTTTGTTGACTGAATAAAGGAATTCAGT
A_23_P90911	0.2613	0.00317115	-3.37	-1.6282	-0.232	A_23_P90911	NM_020905	TTGTCAGAATTAAGTGACTCAAAGTGCTATCGAGAGGTTTTTCAAGTATCTTTGAGTTTC
A_33_P3281273	0.2618	0.0031868	3.37	-1.6324	5.43e-01	A_33_P3281273	NM_003775	AGGCTGCAAGGGGTGGACTGTGGGATGCATGCCCTGGCAACATTGAAGTTCGATCATGGT
A_33_P3243449	0.2625	0.00320444	-3.37	-1.6371	-0.754	A_33_P3243449	NM_001252	TGGGGCGTAGTGGTGGCAGGACAAGAGAAGGCATTGAGCTTTTTCTTTCATTTTCCTATT
A_32_P300427	0.2632	0.00322487	-3.36	-1.6424	-0.379	A_32_P300427	NM_153360	TCTCTAGCTCTTATCACAGATTTTGAACAATTGTCTGTGAGGTTAATGATGGTTTCAGAG
A_24_P416997	0.2632	0.00323566	3.36	-1.6453	6.66e-01	A_24_P416997	NM_145641	AAGAAATTTCCTTTAGACTAACGAATATATTGGGGGGAGGAATAGAGGGGAGGTGTGCAG
A_32_P489130	0.2632	0.00324044	3.36	-1.6465	2.03e-01	A_32_P489130	NM_153252	TGCCAGTATACATTTGTTTCAAGACTTTTGATCTCCACACTTCATTTGTTCAAATAAGCC
A_23_P396867	0.2637	0.00326063	3.36	-1.6518	2.87e-01	A_23_P396867	NM_178582	ACCTTGAACTTAGCTTTCTTTGAAGGGTAGGAAACCTGGAAGACGTACAAAGGAGGGAGA
A_24_P183664	0.2637	0.00326605	-3.36	-1.6532	-0.642	A_24_P183664	NM_014817	CTAATGCCTGGATCTGTGTTCTACTTTAGTTTCACTGGGAAGTCTTTCAGTGGGAGATGA
A_24_P188377	0.2637	0.00327395	-3.36	-1.6552	-0.625	A_24_P188377	NM_000574	TTCAGAAACCTACCACAGTAAATGTTCCAACTACAGAAGTCTCACCAACTTCTCAGAAAA
A_24_P481783	0.2639	0.00330602	3.35	-1.6635	5.50e-01	A_24_P481783	NM_001163692	GCATCTAGGCCCAATGCCAGACCTGGCAACCCATCCTAACTGTATTATTAAAACCAAGTA
A_23_P2066	0.2639	0.00330957	-3.35	-1.6644	-0.362	A_23_P2066	NM_015957	AGGAATAAAGAAATGTACTTCCGGAGGGTATTATAGATATGATGATATGTTAGTGGTACC
A_23_P38154	0.2639	0.00332043	3.35	-1.6671	4.30e-01	A_23_P38154	NM_004110	CGATCTAACCCCTTACCCATCTCTCTACTGCTGGACTGTGGAGGGTCACCAGGTTGGGAA
A_23_P151307	0.2639	0.00332887	3.35	-1.6693	5.80e-01	A_23_P151307	NM_006105	AGACATGACCTTCATTCATGAGGGAAACCACACACTAGTGGAGAATCTCATCAACTTTGA
A_33_P3409580	0.2639	0.00332911	3.35	-1.6693	3.49e-01	A_33_P3409580	NR_038389	TTGGACAGATAGGCCCCTCCAGGTCCTCCCTGCCCTGTAATAAACGTTGCCACCGTGAAT
A_33_P3249872	0.2639	0.0033388	-3.35	-1.6718	-0.942	A_33_P3249872	NM_001996	CCTCCTGTTGCTTTCCTAACCCTGCCCTCCGGGGCGTTAATAAAGTCTTAGCAAGCGTCC
A_33_P3314276	0.2639	0.00334151	3.35	-1.6725	5.79e-01	A_33_P3314276	NM_181718	GGGGGCGGAGGATGGGAACTGGCTAGTGAGCACTGAAATATAAATTCTGAATCCTCTCCT
A_24_P199484	0.2652	0.00337185	-3.34	-1.6801	-0.241	A_24_P199484	NM_004673	TTCCTGGAAGGAACTGGGCATCTAACTGTTACACCAAATCTTAAGTGAATAAAACTTTAC
A_23_P431268	0.2652	0.0033838	-3.34	-1.6831	-0.594	A_23_P431268	NM_014935	TTAGGTACTGAAGAATCCCAGTGAGTTCTGCATTTGTATCTTGCAAGTTTGTATAAACCC
A_24_P161973	0.2652	0.00338573	-3.34	-1.6836	-0.222	A_24_P161973	NM_015205	AGCCTTGATGGGATATGTTAGAAGTGTCATGAAAGTGTGATTCTACTTTTGCAGAAAAAT
A_33_P3274935	0.2657	0.00340237	3.34	-1.6878	5.66e-01	A_33_P3274935	NM_030630	CGTGTCAGAACAATCTTTGCTCTGTACAATCGGCCTCTTTACAATAAAACCTCCTGCTCC
A_33_P3354464	0.266	0.00344578	-3.33	-1.6985	-0.879	A_33_P3354464	NM_005576	TGAGATGCAACATTCACTACACAGGTCGCTACGTTTCTGCAACAAACTGCAAAATTGTCC
A_33_P3390027	0.266	0.00345074	3.33	-1.6997	7.65e-01	A_33_P3390027	AK022397	TTCACTCATTAGTAAGCCGCACTCGCTGAAGGGGAGAGCATGAGCAAGGGAGACGTGAGC
A_33_P3398912	0.266	0.003454	3.33	-1.7005	4.50e-01	A_33_P3398912	NM_017585	GGCAGCTCCTATCTGCAAACTGTGTTCACCCTTTTGTAAAAATAAAGGAACTGGACCTGT
A_33_P3514859	0.266	0.0034551	3.33	-1.7008	3.86e-01	A_33_P3514859	XR_108862	ATAGCAAAGCCACAGCAGACTTGTAGACCAATGAGCATGAAATAAATTGCATTGAAAGCT
A_33_P3209254	0.266	0.00345761	3.33	-1.7014	3.09e-01	A_33_P3209254	AK097937	CAGTGTTTAGCCCTGAATGATTTTTGCTGCAATTTGAATTCTGTGCAACCACAGAGATTT
A_32_P188860	0.266	0.00346329	-3.33	-1.7028	-0.693	A_32_P188860	NM_017563	ATGTTAATGACTTGATTTGTACATAACTCTGTAACTAGGTGAAAGTAGATCACAGCTGAC
A_23_P63402	0.266	0.00347328	-3.33	-1.7052	-0.445	A_23_P63402	NM_013296	GCCAGTCGGTACTTAGCCACCTGATGACTAATGACAACAAAGAGGCTGATGAAGATTTCT
A_23_P171117	0.266	0.00348081	-3.33	-1.707	-0.39	A_23_P171117	NM_024657	CACCACACCAGAAATGGGACCTAAATTAAGGCTTAAAGAATGAGCATGGCCACACTGTCA
A_23_P167159	0.2661	0.00349515	-3.33	-1.7105	-0.383	A_23_P167159	NM_007281	TTCGTGATTCCTTGCAACAATCAATGAGAATCTTCATGTATTCTGGAGAACACCATTCCT
A_23_P95130	0.2661	0.00350174	-3.33	-1.7121	-0.363	A_23_P95130	NM_207113	TTGAGGGATACCTAATTTGCATTCGGTTAGGGGATATTTTTCAACCTCTTGCTTTATACT
A_33_P3219398	0.2661	0.00350973	-3.33	-1.714	-0.325	A_33_P3219398	NM_015461	AACGTTAAGTTTGAGTCTGAAAGTGAACTCCAGAACCACATCCAAACCATCCACCGAGAG
A_24_P80135	0.2677	0.00353977	3.32	-1.7212	2.48e-01	A_24_P80135	NM_014369	TCCTGCTAGGATAAAACATTAAGCGGCTGTTAAAAGAAATAAAAGGAGGACACGTCTCTG
A_24_P89891	0.2705	0.00358695	3.32	-1.7324	3.16e-01	A_24_P89891	NM_005658	GATGAGATGATAATTTAAGACACTGAATGATTTCTTTTCCAACAAAGCTCTATGTTAAGT
A_32_P103669	0.2705	0.00359652	3.31	-1.7347	5.42e-01	A_32_P103669	NM_001164404	GTAGAGAAAGAAATGCCAATTCCAATGCAAGGCTTTATTTGCCAAGTTTTCTTAGAATGA
A_33_P3389153	0.2708	0.00361797	3.31	-1.7397	3.63e-01	A_33_P3389153	NM_005990	TATTCCTCGTGCCCTGTGTTAGTGCTTTCTGTATAAGGGACAGACAGAACTGGGTTTTTT
A_23_P500601	0.2708	0.00361963	-3.31	-1.7401	-0.266	A_23_P500601	NM_033017	TCTACCCTTCTGCTCTAGATTGTCTGGACTCAGGAGATTGTGGCAGTTACTGGATAGTTA
A_23_P132738	0.2739	0.00367525	3.31	-1.753	3.31e-01	A_23_P132738	NM_017541	CTTTGAGAAAGGGGATTTTAGTGGTCAGATGTATGAAACCACCGAAGATTGCCCTTCCAT
A_33_P3242369	0.2739	0.00368305	3.3	-1.7548	3.14e-01	A_33_P3242369	AF370399	GCTAACCAAAATCCAAGCTTTTTGAGCATCAGGATTTCCTTAACACTCTCTCTTACTTTC
A_33_P3464855	0.2739	0.00369107	3.3	-1.7566	2.93e-01	A_33_P3464855	AL050097	GACATAAACTACCACTTCTAATCAGTGTTATAGTTGAGATTCTATCCAGGGCAATAAGAA
A_33_P3399693	0.2739	0.00369867	-3.3	-1.7583	-0.508	A_33_P3399693	AK127048	ATAAACACCAGCAGGATGGATGACACCACAGCCACCACAGGAGCCAGCATCCAAGAGACC
A_32_P47754	0.274	0.00372561	3.3	-1.7645	4.88e-01	A_32_P47754	BC060766	TTCACGTCAACTTCTGGCTCCTCAGTTTGGCAGTAAGGCAGGGAAGTTGTTTTCCTATTT
A_33_P3335865	0.274	0.00372792	-3.3	-1.765	-0.233	A_33_P3335865	NM_001006657	GTGTGCCTAACAAGCAACACAGTAATGTTGACATGCTTAATTCACAAATGCTAATTTCAT
A_24_P356509	0.274	0.00374726	3.3	-1.7694	2.29e-01	A_24_P356509	NM_001142571	TGATGCTGACGTAAATAATACATGGCAAATCTAGTCCTTTATGCAGAAATTCATTGCTGG
A_33_P3246505	0.274	0.00374915	3.3	-1.7698	4.81e-01	A_33_P3246505	AB209539	GGCTGGCAGGCATGATTTTAAAAAATGTAATCATCAGTAAGAAGTACTTCCATGTTAAAG
A_24_P941866	0.274	0.00375136	3.3	-1.7703	3.70e-01	A_24_P941866	AK096941	TTTCTTTTTCTTTAGAGAGCCTTTTGTTTCTTTTTGCCATTATATACTATATTTGGGTTA
A_23_P60146	0.274	0.00376203	-3.29	-1.7727	-0.858	A_23_P60146	NM_006207	CCAGTCTATTCACAGAAGTGTTAACTTTTCTAACAGAAAGCATGATTTTGATTGCTTACC
A_23_P424712	0.274	0.00376774	3.29	-1.774	5.54e-01	A_23_P424712	NM_032779	AGAACTGGAAGCTTGGAGGAAAGCATACTGGAGAATAAGCTACAAAGAGCCTGGGCTTAA
A_32_P384562	0.274	0.00379067	3.29	-1.7791	2.84e-01	A_32_P384562	NR_023386	CACGGAAAACAATTACAGATGTTGGAGGACTTTAAAATATCCTAGTTTAGCAGTTCATCC
A_23_P415633	0.274	0.00379651	3.29	-1.7804	3.10e-01	A_23_P415633	NM_001174103	TGTTTGTACTGATACTAGACCATTTAGAGCCCAATTTGTGGTCTACCTTCAGCAAGTGTT
A_33_P3304312	0.274	0.00379665	3.29	-1.7804	2.49e-01	A_33_P3304312	NM_001172684	TGAGCTTAGAAGTGGTGTGTGCTCTGTCTGTCTGTCTTTGTCTGTCTGTTGTATACAGTG
A_33_P3411975	0.2743	0.00380964	-3.29	-1.7833	-0.448	A_33_P3411975	NM_015429	GCATTACCTGCCGAATCTAAAACACCAGAGGTTGAAAAAATCTCAGCACGACCCACAACA
A_32_P420009	0.2752	0.00383297	3.29	-1.7885	2.60e-01	A_32_P420009	NM_147129	CTGTTGGGCCTCAGTTTCTCTTCCCCACACAGTTTATCTTCCGTCACATTGTGCCGGGTG
A_23_P126278	0.276	0.00385286	3.28	-1.7929	1.33	A_23_P126278	NM_003465	GGGCCACCAAACAGAGAATCCAGGATCAGAAGGTGCCCTACATCTTCCGGGACAACCAGT
A_23_P55256	0.2775	0.00388429	3.28	-1.7997	4.50e-01	A_23_P55256	NM_014897	CTTGTGGTCTTCAGGAAAACTACTCAGAATATAATGACTCCTCATCAGTATCATATTGTA
A_24_P137522	0.2775	0.00389337	-3.28	-1.8017	-0.369	A_24_P137522	NM_019050	TCTTTATTTTGGTTTGGTTTACTTTGGGCTGCTAACCACCAGTGTTAGGAATTAATGTGG
A_23_P393401	0.2806	0.00396477	3.27	-1.8171	5.85e-01	A_23_P393401	NR_003610	CAATGACTTTTCTTTACCCCCTAGCTGTCGGCAGTACTCAGTGGAAGGGTGATATTATGA
A_23_P127367	0.2806	0.0039679	3.27	-1.8177	2.57e-01	A_23_P127367	NM_021173	CTGCTGCCTGTCTCCCTGACCCATGATCTGGCAAGTTAGGCACAGTCAGACATGGACAGT
A_24_P235783	0.2806	0.0039947	3.27	-1.8234	5.11e-01	A_24_P235783	D26121	GAGATTGTAGTTATCTTTTTTGAGATGAGATACTTTCACGACTTTGGTATCATCTGTCAG
A_23_P110957	0.2806	0.00401308	-3.27	-1.8273	-0.254	A_23_P110957	NM_001452	TGTGGGATCTTCGTTGCCTTCAGTAATCAGGGTGTGAAAAAAGCAGACAAGTTGTGTGTG
A_33_P3242453	0.2806	0.00401652	-3.27	-1.828	-0.644	A_33_P3242453	NR_003948	GAATTACACACAGCTCAGGTATAAGAGATATTCGGTAAGTCTGATCAAATCAATAAAGCA
A_33_P3218410	0.2806	0.00402268	3.27	-1.8293	2.11e-01	A_33_P3218410	BC007023	AGAGGTGTGAGCCACGGCATCTAGCCATGCTTAAACATTTTTCATTTCTTTTTCTTTTTT
A_24_P29686	0.2806	0.00402312	3.27	-1.8294	3.16e-01	A_24_P29686	NM_031449	TCACAAACACCTCTCAGAAACAACGTGGGATGAAAAAGCAAGACAGTTCATACAGTATGA
A_24_P192914	0.2806	0.00402409	3.27	-1.8296	9.71e-01	A_24_P192914	NM_153206	CTCCTGTGGGCAGGGTTCTTAGTGGATGAGTTACTGGGAAGAATCAGAGATAAAAACCAA
A_33_P3370094	0.2806	0.00404415	3.26	-1.8338	7.48e-01	A_33_P3370094	NM_007289	ATGAATCCAGAAAAGAAGTGCCGGGTTTGGTGATCTTCAAAAGAAGCATTGCAGCCCTTG
A_33_P3613516	0.2806	0.00406436	3.26	-1.838	6.14e-01	A_33_P3613516	AK024653	GAGGACAGGCACTTACACTAATCTGGAAGCATAATATATAAAGAGTACCTACAAATCAAT
A_23_P153745	0.2806	0.00407244	3.26	-1.8397	1.29	A_23_P153745	NM_006332	ATGAAGCCCAGATACACAAAATTCCACCCCTAGATCAAGAATCCTGCTCCACTAAGAATG
A_23_P55616	0.2806	0.00407608	3.26	-1.8404	3.05e-01	A_23_P55616	NM_001146037	TTCTTGGTGTTTAGCTGGCTCGATGATGTTAACAGTATTAAAAATTAAACCCCATAAACC
A_33_P3274332	0.2806	0.00408078	3.26	-1.8414	1.95e-01	A_33_P3274332	NM_016021	TTCTGAACAGTTGCCTTCAGAACTAGTTTGAGCTGCTCAATAAAACCAGTGACTTTACTC
A_33_P3230688	0.2806	0.00408669	3.26	-1.8426	3.20e-01	A_33_P3230688	NM_052988	CAACAGGAGGCCGTGGCTCTGATGCTGAGCGAAGCTATAGGCTCTTGTTGGATAAAAGCT
A_23_P420326	0.2806	0.00411225	-3.26	-1.8479	-0.659	A_23_P420326	NM_153756	AAATGGTGCTTGATGAGGGAAGGTAGACTCTTCCCTAGGACTGACGAGTTACGGCTGCCA
A_32_P4792	0.2806	0.00412433	3.25	-1.8504	3.93e-01	A_32_P4792	XM_003403578	TAAATAAAAAGGAACTCACACTTAAAGATGTGGAATGTAAATTCTCAGAAATGAAAACTG
A_24_P261259	0.2806	0.00412492	-3.25	-1.8505	-0.598	A_24_P261259	NM_004566	AATAACGGGGACCAATATTTTTAACTTTGCCTATTTGTTTTTGGGTGAGTTTCCCCCCTC
A_23_P85800	0.2806	0.00414808	3.25	-1.8552	1.43	A_23_P85800	NM_001803	TGCCAGACATCACCAGGTTGTAGAAGTTGACAGGCAGTGCCATGGGGGCAACAGCCAAAA
A_23_P333498	0.2806	0.00414881	-3.25	-1.8554	-0.421	A_23_P333498	NM_030636	CAGCCTGTTCTTACTCCAGCTCAACCCATTGGGTGTTGGCTGTTTTTGGTTTTAGTTGTT
A_23_P109427	0.2806	0.00416264	3.25	-1.8582	6.05e-01	A_23_P109427	NM_000854	ACAAGACACTCAGTGTCCTTGGCAGTGCTGCTACTCCTCAGGTGCAGCATACATAACCAG
A_33_P3231090	0.2806	0.00416575	3.25	-1.8588	5.24e-01	A_33_P3231090	BC098585	CTGACCAGATTTGGTTCATGGCCTCGTTCATAACTGAACGAACGACACCTTTCTGCTAGA
A_33_P3318766	0.2806	0.00417372	-3.25	-1.8604	-0.508	A_33_P3318766		ACTCTCCGATGCTCACCTGTGGTTGTGGGTGATGCTCCAGACCATCAGATGCTCACCTGA
A_33_P3317948	0.2806	0.00417889	3.25	-1.8615	2.27e-01	A_33_P3317948	NR_033711	CGAAAAACACGGATGGGATTTCGTTTTCACCTTAAAGCATTAAAGTGCTTTAACTGGTAA
A_23_P57709	0.2806	0.00417987	-3.25	-1.8617	-0.441	A_23_P57709	NM_013363	TATCTGATTGGAAACCTGCCGACTTAGTGCGGTGATAGGAAGCTAAAAGTGTCAAGCGTT
A_23_P429461	0.2806	0.00418622	3.25	-1.863	3.10e-01	A_23_P429461	NM_145059	CCCTATGGCTTAGAGTTGTAGACTTACACTCAACCCTCATGTGAGCGTGGGAGTGAGGGT
A_33_P3389649	0.2806	0.00419661	3.25	-1.8651	3.56e-01	A_33_P3389649	NM_001197218	GCAGAATGCTTCTCAGCAGCAACATCCCCAAACAGCGGCGTTTCACGGTGGCACATACAT
A_23_P403335	0.2806	0.00420245	-3.25	-1.8662	-0.374	A_23_P403335	NM_015065	TGCTTCTTCCGGTCCACACCCTATACTCATGACATTAAATAAAAGGTAGGGATGATAACA
A_33_P3357382	0.2812	0.00422505	3.24	-1.8708	6.20e-01	A_33_P3357382	BC057773	GAATGAGCATGGCTGTGCTCCACTAAAAACTATTTATGGACTCTGAAATTTAAGTTTCAT
A_23_P339633	0.2812	0.00423133	3.24	-1.872	6.00e-01	A_23_P339633	NM_174931	CTGTCAACAACTGGATGTCCAGAAAAATATTCAGGTTCCCAGGGAAGCATGGTACTGGTT
A_33_P3385477	0.2812	0.00424491	3.24	-1.8747	2.77e-01	A_33_P3385477	NM_031921	GGTCCAAGCCTGTGGCTGGAGCTGGTGTGTGTTTATCTAATAAAGTCCCACAGGTGCCTC
A_23_P372946	0.2812	0.00425167	3.24	-1.8761	1.12	A_23_P372946	NM_138461	GGTTACCCATTCAAAGACCTGCATAGTAGGAATTATCTGTATGACCGTTCGCTCTGGAAC
A_33_P3432961	0.2813	0.00426229	3.24	-1.8782	3.98e-01	A_33_P3432961	NR_038889	GACTCAAGTCTCCTTATTTCCTTTTCTAGCATAACAAGGGGTTGTTACTGTTGTTTTACA
A_23_P23924	0.2817	0.00427942	3.24	-1.8816	2.07e-01	A_23_P23924	NM_001748	AGAAGTTCTTATAGAAAGGACACAAGTTTGTTTCCTGGCTTTACCTTGGGAAAATGCTAG
A_23_P38618	0.2828	0.00433468	3.23	-1.8924	3.88e-01	A_23_P38618	NM_004278	GCTAGCTTCTCAAGTTCTTGTGAAAAACAATTTACATAATGACACAGTAGATGTGGAACA
A_23_P346673	0.2828	0.00433711	3.23	-1.8929	2.05e-01	A_23_P346673	AK000249	GCAGGAACAGGTGTCCATGACCCTGATTACCTGGATCTCACAGGTTCTGGGAATGCAATA
A_32_P221	0.2828	0.00434034	-3.23	-1.8935	-0.289	A_32_P221	NM_144602	ATCCACCCCCACATGGTCGAAGAGGACATAGATGCTAAAAAGGTGTTCACCGGAATACCC
A_23_P88489	0.2828	0.0043675	3.23	-1.8988	2.57e-01	A_23_P88489	NM_172095	GTGCAGGCACTGATGAACTTGGAAGACAAGTAAAGCAATGGATGGCTTCAATATCCTTGG
A_33_P3255404	0.2828	0.00437837	-3.23	-1.9009	-0.738	A_33_P3255404	NM_005602	ACTGATGGTGCATTTTATTCTTGAAGTGAAATCTGTGCAATAAAATAACAGACTGTCTGC
A_23_P28953	0.2828	0.00438029	3.23	-1.9013	2.75e-01	A_23_P28953	NM_175850	AACTGTGCCTTGTTTCAACAGTTTTTGCTAATTTTTAGGCTGAAAGATGACGGATGCCTA
A_23_P218784	0.2828	0.00438124	3.23	-1.9014	5.50e-01	A_23_P218784	NM_006386	CATGGAGACAAGAGTCAACCAGAAAGAGATTGGGTACTTAATGAGTTCCGTTCTGGAAAG
A_32_P231086	0.2828	0.00441068	3.22	-1.9071	3.37e-01	A_32_P231086	NM_198181	ATAAATGACTAGGAATGACCTTCAGATAGCGTTTAGCAACTGTAACCAATCTGACAATAA
A_33_P3240972	0.2828	0.00441206	-3.22	-1.9074	-1.08	A_33_P3240972	XM_003119593	ATGGGGGAGCAGAAGGAGCAGATGCGGAAGCAGGAGGAGCACATGGGGGAGCAGAAGGAG
A_33_P3228773	0.2828	0.00445084	3.22	-1.9147	2.89e-01	A_33_P3228773		GCACTCAGCTGAATGAATGATGAACACAACTCATGAAAAGACCTGAATTAATCATATATC
A_23_P19590	0.2828	0.00445689	3.22	-1.9159	3.88e-01	A_23_P19590	NM_003379	GATTATTCTCGAATCACCTCCTGTGTTGTGCTGGGAGCAGGACTGATTGAATTACGGAAA
A_33_P3234882	0.2828	0.00448061	-3.22	-1.9204	-0.553	A_33_P3234882	NM_002725	CTTGAGGAACTCATACCTTGGTAAAGGGAAAGAAATCCATGAATGGATACCTCTGTGTCC
A_23_P18806	0.2828	0.00449543	-3.22	-1.9232	-0.26	A_23_P18806	NM_001024947	AGTATGACAGGTGTTTCATTTGGTTGTGTGGCAAGTGTCCTTGGATATTGTCTTCTGCCC
A_33_P3408237	0.2828	0.00449631	3.22	-1.9233	3.01e-01	A_33_P3408237		TGGAGGAATCTTGAGGAATTAACGGTAAGTGAAATAAGCCAGTCACAAAAAGGCCAATAC
A_33_P3337161	0.2828	0.00450503	3.21	-1.925	3.00e-01	A_33_P3337161	NM_001198568	ACTGAGAATAGCCTTGGGCACCGCCACCATCCTCCTTGTCTTTGCCATGGCCATTACCAG
A_33_P3227375	0.2828	0.00450669	-3.21	-1.9253	-0.58	A_33_P3227375	NM_003247	CCACTGAAACCCTGCACTTAGCTAGAACCTCATTTTTAAAGATTAACAACAGGAAATAAA
A_33_P3645805	0.2828	0.00450715	-3.21	-1.9254	-0.974	A_33_P3645805	AK021797	TAAGAGAAATACCTAATGTAGATTATGGGTTGATGGGGGCAGCAAACCACCATGGCACAT
A_33_P3566443	0.2828	0.00450716	-3.21	-1.9254	-0.416	A_33_P3566443	NR_027267	CTAAAATGACACACCAACATGAAGACATGAACACAATTGCAAAGGGATTGGTTGGATTGC
A_33_P3316278	0.2828	0.00451212	3.21	-1.9263	4.22e-01	A_33_P3316278	NR_003569	GTGGATAAAAACAAGAACCAGCCTTATTTTCACTGTTATATCTTTTGGTGCCACTTTTTG
A_33_P3559138	0.2828	0.0045248	-3.21	-1.9287	-0.798	A_33_P3559138	AK124194	CACCTATGTAACAAATCTGCACGTTCTGCACATGTATCTTAGAACTTAAGCATAACAAAA
A_32_P119569	0.2828	0.00453559	3.21	-1.9307	5.29e-01	A_32_P119569	NR_033350	AAGTCAGTCAACTGAAGAACACCATCAAATCTTTGAAACAACAGAAGAAACAAGTGGTAC
A_33_P3247392	0.2828	0.00453651	3.21	-1.9309	4.11e-01	A_33_P3247392	NM_199261	CTGACAGCAAACTTTATATTCCTTTGGAGTATCGTTCTATTTCTCTAGCTATTGCCTTAT
A_23_P146551	0.2828	0.00454316	-3.21	-1.9321	-0.401	A_23_P146551	NM_024761	AGACAGGGAGTCGTGGCTGTCTCTACATAATACTAACATTTCAGTGAAAAAAGTACAGTT
A_23_P124003	0.2828	0.00454765	-3.21	-1.9329	-0.224	A_23_P124003	NM_170683	AGGGCTCCTTCCTGTGCGACTGGATCTTGCTAACATTCATGAACAAAAACAAGGTCTACA
A_23_P18493	0.2828	0.00456949	-3.21	-1.937	-0.289	A_23_P18493	NM_080685	GCAGATCTTAGGGATGATTAAAGGCAGCATTTGATGATAGCAGACATTGTTACAAGGACA
A_24_P268993	0.2828	0.00457285	3.21	-1.9376	2.48e-01	A_24_P268993	NM_052971	GGCAGATGTACGCTTTAAATTGGTCTCCATTTCTTCTTAGAATGTTGATATATGGATAAG
A_24_P101651	0.2828	0.00457445	-3.21	-1.9379	-0.68	A_24_P101651	BC013171	AACACTATCCAGCCACTCCGACCAGCCAAAAGAACTCAATCAAAATGAGACACAGTAGGA
A_23_P39656	0.2828	0.00457538	-3.21	-1.9381	-0.307	A_23_P39656	NM_022453	TCCAGGGACCAGGTCAAATCAGCAAAGGTTGGGCGAAACCCAGAAAGCTATGCTAGATCC
A_33_P3358898	0.2828	0.0046088	-3.2	-1.9442	-0.708	A_33_P3358898	NM_001144950	AGGGGAGACGTGTGACCCTCTCCAGGATTTGAGGGGCTTAAGACACCCCCAACCAAAAAA
A_32_P175301	0.2828	0.00461987	3.2	-1.9462	3.58e-01	A_32_P175301	NM_014957	GGGCACCTTCCCACTTTCTAGCTCTGGAGAGGTTGGATTTTGCTTTTGTAAACACATGAA
A_33_P3260021	0.2828	0.00463277	3.2	-1.9486	6.54e-01	A_33_P3260021		ATGTCGCCTCTCCAGCATGACCGTATCCAGATGTGGCCTCTCCAGCGTGACTCTGTTTTC
A_23_P120504	0.2828	0.00464744	3.2	-1.9513	3.66e-01	A_23_P120504	NM_018354	CCACACCCTCCAGAGGTCTTAAGAACTAGCCCACCTTATCTGGCTGCTTTAGCTCCAGTG
A_23_P151166	0.2828	0.00465254	3.2	-1.9522	3.40e-01	A_23_P151166	NM_001040107	TCTAGAAAAGTCTCTTATTTTCAAGCTGTTCTAAATAGCTTCGTCTCAGTTTCCCCAAAA
A_23_P212655	0.2828	0.00465913	3.2	-1.9534	3.46e-01	A_23_P212655	NM_130446	TTCTGGTCTCAATGGCTTCGGGAAACACACATATACACATACACCATGCCCTTGAACTCA
A_23_P112289	0.2828	0.00466172	-3.2	-1.9538	-0.503	A_23_P112289	NM_003275	GGGCAAATGGCTTATGTGAGGTAAGACACTAGAGGGATAAATTTCCAGATCAACATGGCT
A_23_P365614	0.2828	0.00466198	3.2	-1.9539	4.77e-01	A_23_P365614	NM_004557	CACTGCTATCGCTATTTAAGAACCCTAAATCTGTCACCCATAATAAAGCTGATTTGAAGT
A_23_P93302	0.2828	0.00466226	3.2	-1.9539	2.79e-01	A_23_P93302	NM_001470	TTTGCACACGTCCATGTTTATCCATGTACTTTCCCTGTGTACCCTCCATGTACCTTGTGT
A_23_P144827	0.2837	0.00468674	-3.2	-1.9584	-0.282	A_23_P144827	NM_012304	ACAAAGCTGACTGTTCACACTGATTGCCCAGCACATACCGTCTTGCCAGTTTCTTCTTTT
A_23_P369666	0.2838	0.00470751	3.2	-1.9621	3.28e-01	A_23_P369666	AL137703	AGTACAGTTGGATTAATCTTGCTATTTAAAAAGTTGGTGGGGCAAAGCCGAGTCTAGGAT
A_33_P3307197	0.2838	0.00470983	-3.2	-1.9625	-0.483	A_33_P3307197	NM_020440	CTGCAGAATTTTCCGTAGACAAAGAAAGGATCTTGTGTATTTTTGTCCATATCCAATGTT
A_23_P27606	0.2838	0.00472647	3.19	-1.9655	2.96e-01	A_23_P27606	NM_004843	TGAGTCACTTACCTGAGGACACCCAGCCAGGCAGAGCTGGGATTGAAGGACCCCTATAGA
A_24_P160104	0.2838	0.00472801	-3.19	-1.9658	-0.488	A_24_P160104	NM_018943	GAAGACTTAGCTGCCCTGGAGAAGGATTATGAAGAAGTGGGGACTGATTCGTTTGAAGAA
A_23_P89509	0.2849	0.00475973	3.19	-1.9714	2.63e-01	A_23_P89509	NM_006461	AGAGGAGAACCTTCGGCGCTCTGACAAGGAGTTAGAAAAACTAGATGACATTGTTCAGCA
A_23_P326760	0.2849	0.00478359	-3.19	-1.9756	-0.589	A_23_P326760	NM_015460	AAAGTTATGCTTCCCTTCATGTTATATGCACATTGCCAAGAATTACTGTCAAGAGAAATG
A_24_P406060	0.2849	0.00482001	3.18	-1.982	4.04e-01	A_24_P406060	NM_182757	CTTATCCAGGTTTGCAAATGTACATGTTCATTTGAATGTAAATCACCATTTCTTGGAACC
A_24_P123408	0.2849	0.00482993	3.18	-1.9838	5.70e-01	A_24_P123408	NM_014945	TTTGACCGCAGCATGCACAAGCTCCAAAGTGGAATTGGCCGGCTGATTCTGAAGGAAGAA
A_24_P937325	0.2849	0.00483582	3.18	-1.9848	3.14e-01	A_24_P937325	AL713762	AATAGGCCTGTAAGATGAACTTGCCACTAGTAAATGTTACTTTTAAGGACATGAATATGG
A_23_P318420	0.2849	0.00483676	3.18	-1.985	2.74e-01	A_23_P318420	NM_018704	TCACAATGGAGTATATTGGCAACTCCACAGCTTATAGTTTGATAAAGGCAAATACATGAA
A_33_P3332860	0.2849	0.00484252	3.18	-1.986	4.16e-01	A_33_P3332860	NM_001001433	GAGAGATTCGCCAGATTGTACAGTCCATTTCTGACCTGAATGAAATATTCAGGGACTTAG
A_23_P18213	0.2849	0.00484365	3.18	-1.9862	3.12e-01	A_23_P18213	NM_015512	GCCTGGATCCAAGATGGCATCCCAGCTGTCTTCTGGATCAGTGGATTCTTCTTCCCCCAG
A_33_P3618429	0.2849	0.00484596	3.18	-1.9866	3.00e-01	A_33_P3618429	AK095793	CACCATGGAAATCACTGTGATTTGTATATATGCCCTAGGAAATTTTTACTGCTGTCTAAT
A_33_P3305093	0.2849	0.00485819	3.18	-1.9887	3.52e-01	A_33_P3305093	NM_001103167	TGTGGCAGATGTGGAGTGTCCCTGGACCCCATTCAGGAAGGTTAAACCCAGCTTCACCCT
A_23_P24215	0.2849	0.00487772	-3.18	-1.9921	-0.437	A_23_P24215	NM_015188	TATAGGGACTTACTTATTGGAGACTGGTAATATAATAAAATATTGAAGGAGTGGCCATGG
A_33_P3249414	0.2849	0.00489534	3.18	-1.9951	4.71e-01	A_33_P3249414	NM_015431	CCCCCAATGCTGGTTTGTATGTGGTTATCATTCAATCTGTATTTGTTGAATGAATAAATG
A_23_P88873	0.2849	0.00489568	3.18	-1.9952	5.14e-01	A_23_P88873	NM_022041	TTTTTTCCAGTCTACACCAGGCCTCTCCAAGGAGACAGTTCATTATTTAGGAGTGAATGT
A_33_P3297255	0.2849	0.00490261	3.18	-1.9964	4.52e-01	A_33_P3297255	NM_031300	ACAAGGCCCCCTGCCTTTGCCTCACATAAACTGTACAGTATTTTCATTAAAAGCCTCTTT
A_23_P424582	0.2849	0.00490439	3.18	-1.9967	4.65e-01	A_23_P424582	NM_030652	GGCAGGTTGCCTGGGCAAGAACTGCTTCAATTCCTTAACAAATGCAACCACCAACACCCA
A_33_P3270941	0.2849	0.00492559	3.18	-2.0003	2.01e-01	A_33_P3270941	NM_207401	GCCGTCGGCATCTGTAGACTAAAAATAAACAGCATAAACAGACACAAACCAAAATAAAAT
A_23_P158829	0.2849	0.00493775	3.17	-2.0024	4.83e-01	A_23_P158829	NM_004313	GCATTAATTTTTTGACTGCAGCTCTGCTTCTCCAGCCCCGCCGTGGGTGGCAAGCTGTGT
A_33_P3303542	0.2849	0.00494261	-3.17	-2.0032	-0.63	A_33_P3303542	NM_001144950	ATGCCTGCACCAACCACCACTACCCCAGAGGAAGAAGAAAGACCCCTGAGGGGAGACGTG
A_23_P316472	0.2849	0.00496124	3.17	-2.0064	5.40e-01	A_23_P316472	NM_144666	TAAGCTGCAGAGCAGGAACATCGTGATGCATCTGCCTTTACCCACCAAGCTCACCCCCAA
A_33_P3363938	0.2849	0.00496923	3.17	-2.0078	2.54e-01	A_33_P3363938	AK316548	ATAGGAAGTAGCTGATCTCTGCAGGAAACTGCTGTTACCTGGCCTCAGCTGAATTTTTGT
A_23_P318604	0.2849	0.00497309	3.17	-2.0084	3.18e-01	A_23_P318604	BC004544	GCATTTTCCGAAAGCAGGGTGAAATTGTCTCTTCCCAGGAAAAAGATTAAACTCCTTGCA
A_24_P353638	0.2849	0.00498078	3.17	-2.0097	9.17e-01	A_24_P353638	NM_021181	GGAGACCTCCCTACCAAGTGATGAAAGTGTTGAAAAACTTAATAACAAATGCTTGTTGGG
A_33_P3306749	0.2849	0.00498201	-3.17	-2.0099	-0.524	A_33_P3306749	BC000189	ACACATGCACACACAGGGGAGCAGATACCTGCAGAGAAGAGCCAACCAGGTCCTGATTAG
A_23_P84219	0.2849	0.00499405	-3.17	-2.012	-0.611	A_23_P84219	NM_139248	AGCATGAGGCAAGGGAAGGAAAAGCAGAGCTTATTTTTCACCTAAGGTGGAGAAGGATCA
A_33_P3272823	0.2849	0.00501316	-3.17	-2.0152	-0.27	A_33_P3272823	NM_002361	GACAACCCTCCCGTCCTGTTCAGCAGCGACTTCCGCATCTCTGGGGCACCAGAGAAGTAC
A_33_P3538279	0.2849	0.00503062	3.17	-2.0181	3.98e-01	A_33_P3538279	AF130079	CTTGGACTTGTGTGTCTCCTATCTACCATTAAACCCTTATGACTTAAGGTATATGTATAA
A_33_P3337019	0.2849	0.00504229	3.16	-2.0201	3.32e-01	A_33_P3337019	XR_110914	GCTTTGGCACCTGGCCAGATTTCTTAAATATGACACAAAAAGTGTAAATGATAGAAGAAA
A_33_P3341429	0.2849	0.00504672	-3.16	-2.0208	-0.795	A_33_P3341429	NM_144573	TGAGCAGGATATGTTAGAAAAGAGGAAAATACAGCGTGAATTAGCAAAAAGGGCTGAACA
A_24_P132787	0.2849	0.00504733	-3.16	-2.0209	-0.283	A_24_P132787	NM_021252	TAAAAACCTCACATTCTACTTGATTTACACTTCCTAGTCTACATTACATGTGGTTGAAGG
A_23_P210176	0.2849	0.00505318	3.16	-2.0219	3.37e-01	A_23_P210176	NM_000210	ATTTCTGTAAAACAGGTTATAACAGTGTTTAAAGTCTCAGTTTCTTGCTTGGGGAACTTG
A_33_P3403018	0.2849	0.00506184	3.16	-2.0234	3.12e-01	A_33_P3403018	NM_178438	CATAGCTCTTTGGAGAACTAGGTGTTGTAATTCAGTTATGAAGCTATTTTCTCTGTAACA
A_23_P121182	0.2849	0.00508556	3.16	-2.0273	3.70e-01	A_23_P121182	NM_012260	GACGCCAGTTGGTGGTCTTGAGTTTTCTCTTTCTTGCAAGATGAAATTTTATTTTCCACA
A_33_P3872301	0.2849	0.00508961	-3.16	-2.028	-0.477	A_33_P3872301	BF570763	CACGACAGCCGGAACGAGCACACACAAACAAGAGACAGCAACACCGAACAAGACGACAAC
A_23_P106898	0.2849	0.00509725	-3.16	-2.0292	-1.06	A_23_P106898	NM_152288	GCCACCATTTCCATTCCTATACAGGATGTGAAGGTCAGAAGGCAGCCAATTGTTGGTTTA
A_23_P16944	0.2849	0.00509755	3.16	-2.0293	3.43e-01	A_23_P16944	NM_001006946	ACCCTGGGCCCTGGGCTGGAATCAGGAATATTTTCCAAAGAGTGATAGTCTTTTGCTTTT
A_23_P26386	0.2863	0.00513156	-3.16	-2.0349	-0.938	A_23_P26386	NM_016140	GCGTCACTAAAGCAAAAACAGGGGGTGCTGTAGACCGGCTGACGGACACCAGCAGATACA
A_33_P3410121	0.2871	0.00515766	-3.15	-2.0392	-0.738	A_33_P3410121	AK127388	AATGAACCCCAGAAGGCCTCACTTTACTAGGTTGATGTGATTGTCCACTTCTTTAAAAAA
A_23_P6561	0.2871	0.0051662	3.15	-2.0406	3.38e-01	A_23_P6561	NM_018029	ATCTTGAGGGGGGAGTGTTGGGTGGAATCATAGATCCATGCACTCCTAACATGAACTAAT
A_33_P3386237	0.2871	0.00519847	3.15	-2.0458	5.23e-01	A_33_P3386237	XR_109319	CCTCACTTATCTCAAGGGTCCAATGTAAGCAATAAAGTCTGTCTCTGGCTTCAACCACCA
A_33_P3390284	0.2871	0.0051993	3.15	-2.046	2.27e-01	A_33_P3390284	NM_001166600	CCAACCTTACACACTTAGAACTCGGAGGAATAGTACAACAATTATGAGCCGTCACAGCCT
A_33_P3219256	0.2871	0.00520949	-3.15	-2.0476	-0.341	A_33_P3219256	NM_004329	CAGGCAGAAATATTTAGTATCTAGTCAGTATCTGTAGCTACACTGTATAACTGTTCTTCA
A_23_P337262	0.2871	0.00521109	-3.15	-2.0479	-0.685	A_23_P337262	NM_153000	GTTTTATATGCTGGAATCCAATGCAGAGTTGGTTTGGGACTGTGATCAAGACACCTTTTA
A_33_P3409854	0.2871	0.00522555	-3.15	-2.0502	-1.02	A_33_P3409854	NM_005568	GGTAGCGGGGTCTCGCACGGTCTGCGGAGTTCGTGGTTGTACAGAAATGAACCTTTATTT
A_33_P3354539	0.2871	0.00522762	3.15	-2.0506	9.01e-01	A_33_P3354539	NM_145165	CCCAGTTTCACAGAATCCTTATTTTTCTGTTCAAATTAGGAATTAGGGACATGGATGAAA
A_33_P3299781	0.2872	0.00524098	3.15	-2.0527	3.93e-01	A_33_P3299781		CCCAACCAAGAGTGAGTAGTGCACAGAAGTCTCCTGGCACCCTGGGAATCCTGCATTTTT
A_23_P18798	0.2872	0.00524814	-3.15	-2.0539	-0.608	A_23_P18798	NM_019119	GTTCTAGTTTCCCGGCATTGATAGTTCCCTATTTGAAATATAATGTTTCTCTTGTAAGTG
A_32_P14843	0.2903	0.00532272	3.14	-2.0658	3.57e-01	A_32_P14843	XM_003118720	ACCCTCAGTGGATGATAATCTGAAGGAGTATCTCCTGGTCCCTCTTCCACCCTCTCCTCT
A_33_P3241378	0.2903	0.00535873	-3.14	-2.0715	-1.25	A_33_P3241378	NR_024583	GGCCCAGGCAAGATAAATAATGTAAGTGGAAAAACCTGTCAACAATAAAGGTTTTAAAGG
A_33_P3316052	0.2903	0.00535978	3.14	-2.0716	2.78e-01	A_33_P3316052		TCCATGATAGTATTGACCTCTTTGTGAGCAATGGCATGGAACTCATTGATCTTAACTTTT
A_23_P11744	0.2903	0.00536547	3.14	-2.0725	2.95e-01	A_23_P11744	NM_182905	ACTTGGGCCGTTGCTCTGACATGGACACAGCCAGGACAAGCTGCTCAGACCTACTTCCTT
A_33_P3289236	0.2903	0.00537516	3.14	-2.074	1.57	A_33_P3289236	NM_020995	AAGCTTTGATAAGAGCTGTGCTGTGGCTGAGTATGGTGTGTATGTGAAGGTGACTTCCAT
A_33_P3404671	0.2903	0.00540287	3.13	-2.0784	3.38e-01	A_33_P3404671	NR_024567	CAGCTGACACACATAACCTGTAATGTTGTGTGAACAATAAATAAACCTTTGTTGTAAGCC
A_23_P115167	0.2903	0.00541823	-3.13	-2.0808	-0.318	A_23_P115167	NM_015350	GCTGCAGTGTTTACTTTTGGGGAAAAATAGCTTGATGAATTTGTCCCCTCATGTGGGTGA
A_24_P332081	0.2903	0.00541902	-3.13	-2.0809	-1.55	A_24_P332081	NM_001105521	CCTCTAACCACGTGACATTCCGTTCCATGCTAAGCAGTATTCACAGGCCTAAAATAGGTT
A_33_P3342481	0.2903	0.0054236	3.13	-2.0816	2.45e-01	A_33_P3342481		TATTTGCAGTAATCACTAAATTTTAACTAATACTATCTTTGCTTCCAGTAGTGTTCTATG
A_33_P3302055	0.2903	0.00542406	-3.13	-2.0817	-0.469	A_33_P3302055	AL833395	GGCATGAGTCAGTCTTAAAATGGCTAATTTTATGTCATGCAAATCTTATCCCCATCAAAA
A_23_P206760	0.2903	0.00543054	3.13	-2.0827	1.76	A_23_P206760	NM_005143	GATAAGATGTGGTTTGAAGCTGATGGGTGCCAGCCCTGCATTGCTGAGTCAATCAATAAA
A_33_P3782469	0.2903	0.0054375	-3.13	-2.0838	-0.237	A_33_P3782469	AL833463	GTTGTTTATCAGTATATAGACCTACCATTAGTAGAAATGATGTATGGCAGGCTTTCTTGA
A_32_P47643	0.2903	0.00544766	-3.13	-2.0853	-0.343	A_32_P47643	NM_001077710	TGGCAGTTTCTAAACAGAGCTTTTTCTATACACTATTTGCAACTGGAGTGCAATATTGTA
A_33_P3274372	0.2903	0.0054578	-3.13	-2.0869	-1.35	A_33_P3274372		TCCATCTCAATGTCCATTCCATTATTTTGTAGCTACAATAAAGAAACATGGGCAGCAGTG
A_33_P3370570	0.2903	0.00546387	3.13	-2.0879	5.14e-01	A_33_P3370570	NM_173800	GCAAGTTTCAGATTCTGACCATGACTGGGTGATTTTGAATTTGAATATGACTGGATATTA
A_23_P252681	0.2903	0.00546867	3.13	-2.0886	2.69e-01	A_23_P252681	NM_005017	ATGTTTGCTCCAACACAGAGGACAGAAGGTATCTCCACATCAGACATCATCACCCGAATT
A_33_P3369213	0.2904	0.00548379	3.13	-2.0909	2.36e-01	A_33_P3369213	NR_024497	AGTGTAGTAGTGCTATCGCAGCTGACTGCAGCCTCAACCTTCCAGGCTGAAGCGATCCTC
A_33_P3231447	0.2904	0.00549039	3.13	-2.0919	3.42e-01	A_33_P3231447	NM_000210	CCGTAATTTAACTTTCTGGGTTGCCTTTATTTTTGGCGTGGCTGACTTACATCATGTGTT
A_33_P3268304	0.2912	0.00551655	3.12	-2.0959	3.73e-01	A_33_P3268304	NM_001161404	CCAGCGCAGACCTGGTGTTTGTTTGTTGGGCTCACGCTTGCACAATGAAGGCTTGTTCAC
A_24_P341000	0.2918	0.00554056	-3.12	-2.0996	-1.76	A_24_P341000	XR_110129	GACCAGATCAACCCTTCCATTCCATCGATTTGGACCGCAGTTTCGGGAATGATGATTTCG
A_33_P3408054	0.2918	0.00554789	3.12	-2.1007	4.78e-01	A_33_P3408054	NR_003132	TATAAGAGCCTCACCAATGACTGGAAAGACCACTTGGCAGTCAGGTACTTTTCTGTAGAA
A_33_P3570974	0.2919	0.00557015	3.12	-2.1041	2.82e-01	A_33_P3570974	BC043205	CAGGTGTGTTCAGTTTGTCACATTCATCAAGCTTACACTTCTCATACATCTTCTTTTCTA
A_24_P352116	0.2919	0.00557758	3.12	-2.1052	5.45e-01	A_24_P352116	NR_003672	GTGTCAGACTCCTGCTAAGAGACAGTATCAAGAAAGATAACTTCAAAATACACTTTCTGG
A_33_P3413732	0.2919	0.00559752	3.12	-2.1082	2.58e-01	A_33_P3413732	CR979835	AAATGATGATTTACTGCTGTTACCATCATCACTGCCTTCAGTGACCAAGGGCCTTCCAAG
A_24_P254551	0.2919	0.00561612	-3.12	-2.111	-0.281	A_24_P254551	NM_015185	AAGGGGAGCCCAATTAAATACCTGGGTTCAGTATCCTAACCTGTTATGTCCTGACAGCAA
A_33_P3255964	0.2919	0.00561738	-3.12	-2.1112	-0.479	A_33_P3255964	NR_003599	ATGTGACCAAACACACACACGCACATAGATGAGATGTGCAGGCAGATGGTTCCCAATAAA
A_23_P81058	0.2919	0.00561952	-3.12	-2.1115	-0.718	A_23_P81058	NM_001201	GTGCTTAAAGTATACCCTAACATGACAGTAGAGTCTTGCGCTTGCAGATAACCTGGCAAA
A_24_P51909	0.2919	0.00562778	3.12	-2.1128	4.64e-01	A_24_P51909	NM_006651	TCGTGTCTTTTAAAAACTCCTGTTTTCACACCTTACAAAGCCAGCTCTGAGCAGACAGGG
A_33_P3247057	0.2919	0.00563141	3.12	-2.1133	3.78e-01	A_33_P3247057	NM_001162995	CATGTCAGTATTCTAGTCCAGTATTTGCCAGTTTCCAAGTAAAAGCTTTTGTGTTACGTG
A_23_P406350	0.2927	0.00566194	3.11	-2.1179	4.04e-01	A_23_P406350	NM_138431	ATGGACGCTGGCACAATCTTGAGAGGGTCAGCCTTGCTGAGCCTATGTCTGCAGCACTTC
A_23_P54770	0.2927	0.00568306	3.11	-2.121	5.58e-01	A_23_P54770	NM_018690	GCAGGCAAAACCAGACGTCTGGGAATACCGTGAACTTAAGGAGTCTGATTCTCCGACACA
A_33_P3220202	0.2927	0.00569061	3.11	-2.1221	3.30e-01	A_33_P3220202	NM_013355	CGCAGCAAGGAGTGATATGGTTTGTCTTTTTAAGACTGGACTTGCTTTATATTAAATTTG
A_24_P229164	0.2927	0.00570058	3.11	-2.1236	3.53e-01	A_24_P229164	NM_003959	CCTGAGCCTCAACTCTTCAGAAAATAGTGTTTTTAATATTCCTCTTCAGAAAATAGTGTT
A_23_P354297	0.2927	0.00571759	3.11	-2.1261	3.44e-01	A_23_P354297	NM_022092	GCGCAGCCTGTACATCAGGGACTTGCTTTAGTTTTTTGAGCCGCGGACATGCCCTCGCAT
A_23_P159775	0.2927	0.00573104	3.11	-2.1281	5.45e-01	A_23_P159775	NM_004961	GGTGGATAGGGTGGGGTCTCCATCTACTTTTTGTCACCATCATCTGAAATGGGGAAATAT
A_23_P111797	0.2927	0.00573466	3.11	-2.1287	6.26e-01	A_23_P111797	AL136837	AGTTTTTCCCTTTTGGCGGCCTCTCCAGGCCCAGAACTTCCTCAAGTCGGCCTCTTTAGG
A_33_P3242909	0.2927	0.00573646	3.11	-2.1289	2.89e-01	A_33_P3242909	NM_145276	TCTACCACCCCCTGGGCATACATAAATCGACACATGCCAAGTCCTTTTTTAAAAATGACA
A_23_P218858	0.2927	0.00574585	-3.11	-2.1303	-0.714	A_23_P218858	NM_015429	CCCACCATAAATGTTACAATATCTGAATATGCTTTGTCAAACTATCCCTTTATGCAATCG
A_24_P372012	0.2927	0.00575878	3.11	-2.1322	5.39e-01	A_24_P372012	NM_004968	TCAAAAAGTGGATCTTCTTGGAGCGAGCAGATGCAATCTCTTGTCTCACATGCTAGCAAC
A_33_P3358648	0.2927	0.00576671	3.11	-2.1334	2.87e-01	A_33_P3358648	NM_001137552	TCTGGAAGTGATATATGTCAAATTACATTTCCTACTGCAGTATTTGAGCAGGGACAGTCA
A_23_P200598	0.2927	0.00576957	-3.1	-2.1338	-0.247	A_23_P200598	NM_024544	CTCATCCAGCCCGTCGCAGCTTGACATCTTGGTGTACTCATGTCGCTTCTCCTTGTGTTA
A_33_P3394140	0.2927	0.00579013	3.1	-2.1368	5.95e-01	A_33_P3394140	NR_024431	CCTTGGAAGACTCATTTTGGACTTCTGACCTTGAACGTTGTAAGAGAATAAATTTACATA
A_33_P3350583	0.2927	0.00579082	3.1	-2.1369	3.93e-01	A_33_P3350583	NM_138819	GCAAGCTGACATGTTAAGAATTAGGACAAACAGAACAACATTTAGGAATCGACGCTCTCT
A_23_P128624	0.2932	0.0058108	3.1	-2.1398	2.72e-01	A_23_P128624	NM_024537	CTTCTCAGGGTCAAGGCTTTATGTTAAAGCTTCCTGTCGGGGCTGCTAGGTCAGCATTAA
A_23_P157736	0.2946	0.00584866	-3.1	-2.1453	-0.25	A_23_P157736	NM_032728	AATAGGTCGTTTCCAAGTCACCCGTTTTGGATGTGCATTTCATGTGACAATACAGATGAC
A_33_P3333327	0.2955	0.00588436	3.1	-2.1504	2.45e-01	A_33_P3333327		GCCAAAAGCCAAAAAACTTAATCTGTTGTCTGTGTGGAAAGTTCCTTTAGAAAAAGTAGT
A_24_P273253	0.2955	0.00589043	-3.1	-2.1513	-0.431	A_24_P273253	NM_138420	CTTCAAGAAGAAACAATCACGTTTTTTGATGCCCGAGAAAGTTTCTCCCCTGAAGAGAAG
A_23_P90333	0.2955	0.00594124	3.09	-2.1585	3.68e-01	A_23_P90333	NM_001033719	GTAAAGAATGTGATAAGGCCTTTAATCGCAGTGATCGACTTACTCAACATGAGACAATTC
A_23_P387471	0.2955	0.00594437	3.09	-2.1589	3.86e-01	A_23_P387471	NM_005931	TATGCATTACTCTGTGTCTACTATTATGTGTGCATAATTTATACCGTAAATGTTTACTCT
A_24_P366526	0.2955	0.00594773	3.09	-2.1594	2.27e-01	A_24_P366526	BC105992	GGAGATGCCCGGCCCTGGGATGCTGTTTGGAGATGGAATAAATGTTTTCTCATTCAAAAA
A_24_P62505	0.2955	0.00595129	-3.09	-2.1599	-0.361	A_24_P62505	NM_015101	AGCATTTTAGACTAGGACTGTTCTACTGTGAAGAAAGTTCTGTCTCCTTTAGCCCGGTTT
A_23_P500501	0.2955	0.00599726	3.09	-2.1664	8.08e-01	A_23_P500501	NM_000142	TGCTACCTTTCAAAGCTTGGAGGGAAGCCGTGAATTCAGTTGGTTCGTTCTGTACTGTTA
A_33_P3406886	0.2955	0.00600526	-3.09	-2.1675	-0.281	A_33_P3406886	NR_027790	AAGATTTGCTTCAAACGACAACAAGAGAGACAGAAAGTATCTGGTTCAACCGCTGCCCGA
A_33_P3278392	0.2955	0.00601813	3.09	-2.1693	2.43e-01	A_33_P3278392	BX538347	CTGGCTTGTCATGCCTCATTATAGAGTGTATCAGGTAAAGAAGTAATATTAAAATCAGGA
A_33_P3269218	0.2955	0.00602125	3.09	-2.1698	5.84e-01	A_33_P3269218	NM_001703	CCTGTCCCGGGCTGGGGAGGGGGGAGGGGAACTTTGTTGGGAATAAACTTCACTCTGTGG
A_33_P3507542	0.2955	0.00602875	-3.09	-2.1708	-0.503	A_33_P3507542	NM_014262	GGGAGGTATAACCCTGCTCCTCTCTCCCAGTCTGTGCAATAAAGGTCGTGAAGATCTCTC
A_23_P54144	0.2955	0.00604905	-3.08	-2.1737	-0.527	A_23_P54144	NM_001202	GGACACGAGACTGGTCCACCACAATGTGACACGGTGGGAAACTTTTGATGTGAGCCCTGC
A_24_P360078	0.2955	0.00605371	-3.08	-2.1743	-0.225	A_24_P360078	NM_006726	AGCAAGTGTGAAATAGTTACCATTTTTTCCTGATCTGTCATCTTCATAGCACAACAAAAC
A_23_P211141	0.2955	0.00605622	-3.08	-2.1747	-0.297	A_23_P211141	NM_001389	GACTCCCGGGGCCATTTGAAAGGAAACAATCCTTACGCAAAATCTTACACCCTGGTATAA
A_23_P366376	0.2955	0.0060834	-3.08	-2.1784	-0.346	A_23_P366376	NM_003212	TAGGTGGTGGTAGAGAAGCAAGTAAAAAGGCTAAATGGAAGGGCAAGTTTCCATCATCTA
A_23_P129577	0.2955	0.00610003	-3.08	-2.1807	-0.239	A_23_P129577	NM_033208	CATGGGGATTATAGAGAAATTCTTGAAAAATGTGGGGAGTTGGAAACTAAGTTGGATGAT
A_33_P3209541	0.2955	0.00610444	-3.08	-2.1813	-0.458	A_33_P3209541	NR_024207	TGGAAACCAATGACAGATATCATAATATCACACCCACACATCAGGCAAGAGACTTGTTCC
A_33_P3266010	0.2955	0.00610762	3.08	-2.1818	3.60e-01	A_33_P3266010	NM_004292	TCCAGGGAAGCTGGGGGAACTGCCACATCTGAGGAACTGGAATAAAGATGAGGGGGCTTC
A_24_P535219	0.2955	0.00610799	-3.08	-2.1818	-0.266	A_24_P535219	AJ420510	ACATTTAGTACAGGTACCATAACCAAGAGATTTCTTAGTTTTGATGGATTAAGAGAGAGC
A_24_P109214	0.2955	0.0061086	3.08	-2.1819	1.14	A_24_P109214	NM_001645	GTTTTCAGAGACATTTCAGAAAGTGAAGGAGAAACTCAAGATTGACTCATGAGGACCTGA
A_24_P884376	0.2955	0.00613478	3.08	-2.1855	5.87e-01	A_24_P884376		TAATTTGTTTATCTTTTGTGTATAAATCCCAAAATATGGAATTTTGGAATATTGCTACCA
A_23_P122563	0.2955	0.00613685	-3.08	-2.1858	-0.288	A_23_P122563	NM_014260	ACAGTAGGGAAGAGGCTGGACTATATCACAGCTGAAATTAAGCGATACGAATCCCAGCTT
A_32_P216872	0.2955	0.0061378	3.08	-2.1859	5.80e-01	A_32_P216872	BX647358	GTTGGTGGCGGTAATTTTGTCCATCAAATGAATATGTGTGAAAACATTCCCTTCTTCGGC
A_33_P3382423	0.2955	0.00613869	3.08	-2.1861	3.29e-01	A_33_P3382423	NM_182498	CGATGAGGTTTCCATGTATTTACTTACAGACCCCATAATGTAAAGGCTCTAATAATAGAA
A_33_P3392525	0.2955	0.0061603	-3.08	-2.189	-0.387	A_33_P3392525	NM_001661	TAGATTGTGTGTTACGGGATGGCTTGTGAAAATTATAGGGGGGAGTGGAAAACCCCTCAA
A_23_P71328	0.2955	0.00616812	-3.07	-2.1901	-0.392	A_23_P71328	NM_030583	GAGCCCACAAACAAGCATCTCTTCTATGCCGAAGACTTCAGCACAATGGATGAGATAAGT
A_33_P3228642	0.2955	0.00617181	3.07	-2.1906	3.30e-01	A_33_P3228642	AK298929	TTGCCCTTCTCTGTATCTGTGCAGAGCTGTCTACTGTTGGCGACTCAGTGCGTGTCTTGA
A_24_P873659	0.2955	0.00617187	3.07	-2.1906	4.34e-01	A_24_P873659	NR_002819	AAGCAAGCTGTTTTTATAGCAGCTCTTAATAATAAAGCCCAAATCTCAAGCGGTGCTTGA
A_23_P315836	0.2955	0.00617649	-3.07	-2.1912	-0.346	A_23_P315836	NM_017451	GGACTTTATCATCGGCAGACCTCAGAAGACAACACACAAAGGTTTCTTTTTTCTTAGCTT
A_33_P3303717	0.2955	0.00618071	-3.07	-2.1918	-0.484	A_33_P3303717	NM_001608	GTCTTCTATAAACCAGGCTGTTAATACAATGATGACAAACAAAACTGGCAAGATCACTAA
A_24_P153456	0.2955	0.00618922	-3.07	-2.193	-0.889	A_24_P153456	NM_024786	AGAGTCAATACCAGAGAACCAGAGGCATCCTCTGTATTTTAATGAACTCTGCATTTTAAT
A_24_P418637	0.2969	0.00622756	3.07	-2.1982	4.36e-01	A_24_P418637	NM_012090	CAATACTGATGTCAGATAAAACTTTTCCCCAAAACCCTGTTGAACTAAAGGCACTTTATA
A_32_P27917	0.2985	0.00628598	3.07	-2.206	3.67e-01	A_32_P27917	NM_015656	ATGGGGGGTAGGGTTTTGTAAAGGTTCTGTTAGGTTCATATTTTTATATCATTTTGCCCA
A_33_P3218531	0.2985	0.00629405	-3.07	-2.2071	-0.741	A_33_P3218531		AGTGGTAACTCCATTCCAGCAAATCACCCTGTTCCAGGCAGGGCAAGTCCAGGGAGAGCT
A_23_P138507	0.2985	0.00629816	3.07	-2.2077	2.32e-01	A_23_P138507	NM_001786	CCCATGTCAAAAACTTGGATGAAAATGGCTTGGATTTGCTCTCGAAAATGTTAATCTATG
A_33_P3404316	0.2985	0.00630421	-3.07	-2.2085	-0.428	A_33_P3404316	NR_024430	TATGTGACTTTGTCATATGTTCCTAACCCCCAATAAAAGCAATGTTGCATCAACTGTGAA
A_23_P108514	0.2988	0.00631953	-3.06	-2.2105	-0.873	A_23_P108514	NM_001008910	CACCCATTCCATCCAGGACTTCTCTTACACTTGAGGGTAGCGGGGTCAGGACAATCATCT
A_33_P3212615	0.2999	0.00635357	-3.06	-2.2151	-0.376	A_33_P3212615	NM_006287	CTGCTTTGTTCATTCTCTGTATTCAAAATTAACAGATCATGCTGAAAACCACTCAAACGA
A_23_P329573	0.3003	0.00637237	3.06	-2.2175	1.09	A_23_P329573	NM_000211	GCCAATTTATTTACATTTAAACTTGTCAGGGTATAAAATGACATCCCATTAATTATATTG
A_33_P3212982	0.3008	0.00639506	3.06	-2.2205	2.35e-01	A_33_P3212982	NM_014798	CACATTCCTGATTAAAAGGTCTGGTTTTTTAAGGTGGGTTTTTCCCATTCATATTTCAAC
A_33_P3326020	0.301	0.00640921	3.06	-2.2224	4.74e-01	A_33_P3326020	BC066775	AGTAGCTGGGATTACAACAGCTGTGAGCCATCGCGCCTGGCACAACTTACAATTTTTTGA
A_24_P921933	0.302	0.00644025	3.06	-2.2265	2.37e-01	A_24_P921933	NM_001078166	ACTGTTAGACTGAAGTTCTGTTGTAACATAACCATTATTTCCATCACAGTATGAAGACTG
A_33_P3236316	0.3033	0.00647846	3.05	-2.2315	5.77e-01	A_33_P3236316	NR_037596	TTCACACCCAGCTCTTGCCTCTGAGTGGCCTCTCCAGGAGCAAAACTTTCTCAAGTCGGC
A_33_P3304538	0.3035	0.00649497	3.05	-2.2336	4.88e-01	A_33_P3304538	NM_207396	CAGCAGTTTTCCATTTCTCCACAGTATCCTTTTCATTTAGAGGAGCTTAATAAATGCTTT
A_33_P3363655	0.3037	0.00650885	3.05	-2.2354	2.37e-01	A_33_P3363655	NM_022662	AAGTAAAAGCCAGGCATTGGCAGTTTATAAAGCATTTACAGTTGACAGTCCTGTTCAGCA
A_23_P160460	0.3042	0.00653044	-3.05	-2.2382	-0.561	A_23_P160460	NM_003115	AAGAATGCTGATAGTCAGAATGGGAAAGACAACCCTACTACTGCAAGGCATGCTTTGATG
A_24_P588897	0.3057	0.00657815	3.05	-2.2443	3.13e-01	A_24_P588897	NM_013272	GATTTCCTGGTAAGATCATTGGATTTACAGAATACAAAAATGTACGGGATGGAATAAACC
A_32_P232035	0.3057	0.00658377	-3.05	-2.245	-0.482	A_32_P232035	NR_026776	AGTGTGTGTTTACACGGAGTATCGGGCGTCTTTCTTATGGGTGGACATTGTGGATAAGAA
A_33_P3242829	0.3066	0.00662752	3.04	-2.2506	1.97e-01	A_33_P3242829		CATAGTGAATAAGGCGTGTCTTTCCATTTAAAATTGCCACTGAACTGTGAATTTATGGTT
A_33_P3418716	0.3066	0.00663132	-3.04	-2.2511	-0.546	A_33_P3418716	NM_025202	TTCAACAGGAGGAACAGCATGCCACCATAGTAACACACATTAGAGAAAGGACAGAGGTCT
A_33_P3336462	0.3066	0.00664645	3.04	-2.253	6.68e-01	A_33_P3336462	AK123300	CATCAGAAAACACAAGATATAGGGACTGGAGGCCTCTCCACAAATGAAATGGATATGGGA
A_33_P3224730	0.3066	0.00665005	-3.04	-2.2535	-0.833	A_33_P3224730	AK128680	TCGCCCGGCCACACCTGGTGGTGTCATTCTGAACCCTGTTGCAATATAAAGGGATTTTTT
A_23_P147109	0.3066	0.00665757	3.04	-2.2544	3.59e-01	A_23_P147109	NM_017723	GCATCGGCTTGTATCAAAAGGTCCAGACCTAAGGGGAAATTTTATCTCTTTCTTTCTTTC
A_23_P356004	0.3081	0.00670025	-3.04	-2.2598	-0.325	A_23_P356004	NM_013434	TTCTCAGCATCCACTAATATTCAGTCCTGTATATTTTAATAAAATAAACTTGACAAAGGA
A_33_P3316621	0.3083	0.00671584	-3.04	-2.2618	-1.36	A_33_P3316621	NM_001201	GCAGTGAAACTGTGAAGGATACTTCACTACCAATGTATAAGCTTTGTTGAATTTGTATCA
A_33_P3254013	0.3085	0.00672997	3.04	-2.2635	2.87e-01	A_33_P3254013	AK131464	AAGCCACTCAGAGAACGACGCGGTTTCCGATGTGTGTTCACTGGTCTCTCTCTGGGTCAG
A_23_P39465	0.3089	0.00674988	3.03	-2.266	5.33e-01	A_23_P39465	NM_004335	TGCTCGGCTTTTCGCTTGAACATTCCCTTGATCTCATCAGTTCTGAGCGGGTCATGGGGC
A_24_P941708	0.3104	0.00679326	3.03	-2.2714	5.33e-01	A_24_P941708	NM_001042417	GCTTCTTCACCTAGTGTAGGCATAAATCCTTTGCTTTTCATGGTTTTGTAAAAAGGTAGT
A_24_P54390	0.3106	0.00681047	3.03	-2.2736	4.41e-01	A_24_P54390	NM_170672	CATTAAGGCAAAGTAGTTCCAGTGATTTAAAATACGGTTCCAAATACGCTAAAACCAACT
A_33_P3407941	0.3107	0.00682247	-3.03	-2.275	-0.895	A_33_P3407941		ATGAGAGATTGGCTAGCACAAAGTAAAGAGAACTCTAGAGAATATGGGACTAGCCCAGCC
A_32_P15544	0.3107	0.00685996	-3.03	-2.2797	-0.365	A_32_P15544	NM_178013	ACCCACTAGATTTTGAGCTTACAGAGACATAAGGGTACTTAAAACCCTGCCGGCCTAGTA
A_32_P141488	0.3107	0.00686361	-3.03	-2.2801	-0.465	A_32_P141488		AAACGAGACTGCAAATTCTCAAGACTTCAAACCCCTTCAATCTGGGTAATACAAAGGAAG
A_24_P3804	0.3107	0.00686455	3.03	-2.2802	5.17e-01	A_24_P3804	NM_001039651	AAATGGCTCCAGGTAGTGAGTCAATGAAGTTCAGACATGTTGGTGTAAAGTTTCTCCTCT
A_24_P84008	0.3107	0.00686696	-3.03	-2.2805	-0.305	A_24_P84008	AI198876	CGGAGTGTCCAGCCTCCATCTTTGGCACCGAGAAAGTCAACTGTTCATTTGATTTCAAAA
A_33_P3276913	0.3116	0.00692683	3.02	-2.2878	4.73e-01	A_33_P3276913	BG533310	CTGTCATTGAAGCAAGAATTGAGATGTCCAAAGAGAACAGAAATGGGACAATTTAATACT
A_23_P106362	0.3116	0.00693448	3.02	-2.2888	7.58e-01	A_23_P106362	NM_020980	TCTACATCAAGGGATGCACCTTCAGTCAAACTGTCAAAAAGCCCAGAATTCCCAAAGGCA
A_23_P218190	0.3116	0.00695407	3.02	-2.2911	4.23e-01	A_23_P218190	NM_000070	ATCCAAAGCCATGCAGGATCACTCAGGATTTCAGTTTCACCCTCTATTTCCAAAGCCATT
A_32_P116323	0.3116	0.00697507	3.02	-2.2937	4.17e-01	A_32_P116323	NM_015092	AGCAAACATCCCGCATCGCTATTGGACCTCTGAGACTTTCTACTTTAACAGTTTCACAGT
A_23_P52227	0.3116	0.00697717	-3.02	-2.2939	-0.949	A_23_P52227	NM_004962	GCATTGACACCATTCCCCACAGAGATAGTCATGCTGAGTGTGGGTTGTTTAAACATGCAT
A_23_P329254	0.3116	0.00698274	-3.02	-2.2946	-0.644	A_23_P329254	NR_026903	CCATTCGATTACATTTTCTTTTATTTTCCTACAATGTAAGCACGGTTTTAGTCCTGTAGG
A_23_P75380	0.3116	0.00698279	-3.02	-2.2946	-0.252	A_23_P75380	NM_003977	GCTGGACCACTGCTCTTCCATCCTCAACAAGTACGACGACAACGTCAAGGCCTACTTCAA
A_32_P142128	0.3116	0.00698484	3.02	-2.2948	3.10e-01	A_32_P142128	NR_026566	TGCTTGCAAAGGGTTGTAAAACTTTATTGTGATTATTCTTGCTTTAAGCTGAAACATCCC
A_23_P338325	0.3116	0.00699232	3.02	-2.2958	2.82e-01	A_23_P338325	NM_005230	GTACTGCTTTCTTCAAACTCTCAGAAATCCTGATGACGTCTGGCCACAATTAAGGACTCA
A_33_P3412900	0.3116	0.00699923	3.02	-2.2966	3.80e-01	A_33_P3412900	NM_001039771	GGGTGTTACAGGTACAAGTAGGTATGTTGCAGAGGAAAATAAATATCAAACTGTATACTA
A_33_P3360097	0.3116	0.00700614	3.02	-2.2974	2.29e-01	A_33_P3360097	NM_000485	TCAGCCACACTGAACCCAATTACACACAGCGGGAGAACGCAGTAAACAGCTTTCCCACAA
A_32_P453321	0.312	0.00704121	3.02	-2.3016	2.86e-01	A_32_P453321	NM_001145636	TCAGATGGCCTACCTCACACACTTCGAGGAGGATGTAGAATCAAAGGAGTAACAGCCCCT
A_23_P29922	0.312	0.00705848	-3.01	-2.3037	-0.298	A_23_P29922	NM_003265	CTGAACCATGCACTCTGTTTGCGAAGAGGAATGTTTAAATCTCACTGCATCTTGAACTGG
A_23_P93360	0.312	0.00706529	3.01	-2.3045	4.32e-01	A_23_P93360	NM_001136	CCCTTGAACTGTTCTGGCCTCAGACCAACTCTCTCCTGTATAATCTCTCTCCTGTATAAC
A_33_P3241108	0.312	0.0070664	3.01	-2.3046	2.00e-01	A_33_P3241108	NM_018198	TCTCAACCCAGAATGGAAATGGAGGAGGTTCCATTAACTTTGCGCTCAGACGAGTAACTT
A_33_P3331711	0.312	0.00707002	3.01	-2.3051	4.74e-01	A_33_P3331711	AK124300	AATTTTGTTGCCCAGGTAATCAGCACAGTACCTGATGTTTTTCAGTCTTCACCCTCCTCC
A_33_P3374623	0.3122	0.00708499	3.01	-2.3068	3.86e-01	A_33_P3374623	NM_019112	TTCTTGTACTTCTCCAAGGACCAGGGGAAGGACGAGGACACCGAAGAGCAGAAGGAGGCA
A_33_P3383551	0.3126	0.00711471	-3.01	-2.3104	-0.52	A_33_P3383551	AK131358	AACTTACCAAGTAGCAAGACTAGAGCAACCAGCAGAAGACCCTTGGGGGCAGCCATCATG
A_33_P3410284	0.3126	0.00713036	3.01	-2.3122	1.74e-01	A_33_P3410284	AK090793	AAAGTCTCAGACATTGCCTGTTTCCCGTAACAGAACAGGAATGATGCATGCCAGATTGCA
A_33_P3335910	0.3126	0.00713535	3.01	-2.3128	4.49e-01	A_33_P3335910	NM_033071	CAGCAGGCCAAGTCAATCAAAGAACAAGTCAAAAAATTAGAAGACACGCTTGAAGAAGAG
A_24_P6903	0.3126	0.00713887	-3.01	-2.3132	-0.369	A_24_P6903	NM_001017992	CACATCGTGCCCATCTATGAAGGTTATGCCCTGCCTCATGCCATTCTACGCCTGGATCTG
A_23_P111724	0.3128	0.00715308	-3.01	-2.3149	-0.258	A_23_P111724	NM_138290	TGAAATTTTATATTGTTCTGGTACATGTCTGAAATTCTATTGCTTGGAGAGAATCCCCTC
A_24_P142473	0.313	0.00718525	-3.01	-2.3187	-0.24	A_24_P142473	NM_015343	ATTCTTAAGAGGAGATATTACAGACAGCACTGCACTTTGGAGTTGGGCAGCTACATCAAG
A_33_P3268310	0.313	0.00718609	-3.01	-2.3188	-0.227	A_33_P3268310	NM_001205288	TGCAGCGCAGGCACAGTGACGTGAAAGTCTACAAGGAGTTCTGTGACTTTTATGCGAAAT
A_33_P3258723	0.313	0.00720459	-3.01	-2.3209	-0.233	A_33_P3258723	NM_022762	TGTTTCTGTTTGCGTTTGACTTAGTAGCAACCGACAGAGTGGCAAGGGATTTGGTCTTCA
A_33_P3324137	0.313	0.00722761	3	-2.3236	3.74e-01	A_33_P3324137	BC015320	TTCAGTTGTCCAGTGACAAGGCTTGCTGCATACACACCACTTTGTTTGTTTCTCATACCT
A_23_P90804	0.313	0.00723482	3	-2.3245	2.09e-01	A_23_P90804	NM_145686	CTAGGTTTAGTCAGAGCTTTCACAAGTAATAACCTTTCTGTATTAAAATCAGAGTAACCC
A_23_P201790	0.313	0.00723678	-3	-2.3247	-0.378	A_23_P201790	NM_002481	TATGCAATTTTGAGTGGCCTTTCAACCCTAAGATGAATGGTTTTGTTTTACTGGTTGTTG
A_33_P3209885	0.313	0.00725431	-3	-2.3267	-0.228	A_33_P3209885	NM_020405	ATCTTTGAATATCACCGCATAGAGCTGGACCCCAGCAAGGTCACCAGCATGTCGGCCGTG
A_23_P54736	0.313	0.00725831	-3	-2.3272	-0.527	A_23_P54736	NM_016541	ACTCCCACCATCCTGTGAACCCCACTCCACTCGCACGTGATTACAGTCTGTAAAGGTGTG
A_32_P15421	0.313	0.00727492	-3	-2.3291	-0.27	A_32_P15421	NM_152267	TTATGACTGCATAGTTTGTGGAAACAAAGATCTTGAGGAAGATGAGGGAAGCCCTCCCCT
A_23_P43276	0.313	0.00727836	-3	-2.3295	-0.371	A_23_P43276	NM_032777	AAAGCTTTGTATTATTCTTCCACATATGCTGGCTGCTGTTTACACACCCTGCCAATGCCT
A_33_P3857467	0.313	0.00728416	-3	-2.3302	-0.948	A_33_P3857467	BC036258	CGCCTTTCTGGAGCATCAGTATTACTGCAGGATTTGGAAGAAACAAATTCAAATAATTTC
A_33_P3357283	0.313	0.00730315	-3	-2.3324	-0.551	A_33_P3357283	XM_001715205	GATGCCGGGGAATATGAATGCCACACACCCAGCACCGAGAAGCAATACTTTGGGAGTTAA
A_33_P3284919	0.313	0.00730556	3	-2.3326	3.42e-01	A_33_P3284919	NM_001178061	AAAGGCCTAGTCTATGGGATGGGGCGGCGGAGGGAATTTTTTGAGAAATAAAATGAAGCT
A_33_P3509233	0.313	0.00731317	-3	-2.3335	-0.704	A_33_P3509233	XR_109995	ACCCAGGGATTTGCCACAGTAGGAAGACATGACCACTACTAGGATAGAGAGGTAAAAAAT
A_33_P3343493	0.313	0.00732681	3	-2.3351	2.84e-01	A_33_P3343493	NM_001470	TGTTCACCAAGATTTGGTGGGTCCACACGGTCTTCACAAAGAAGGAAGAAAAGAAGGAGT
A_33_P3405839	0.313	0.00733974	3	-2.3366	2.70e-01	A_33_P3405839	NM_175722	TATCAGAAGATCTGCTGAGCATCATTGCAAACATGTCTGGATGTCTCCCTTACATGCTGC
A_33_P3290707	0.313	0.00734632	3	-2.3373	7.05e-01	A_33_P3290707	NM_007289	CTTGTCCTGCTCCTCACCATCATAGCTGTGACAATGATCGCACTCTATGCAACCTACGAT
A_24_P627984	0.313	0.00735782	3	-2.3386	2.72e-01	A_24_P627984	NM_014805	TAAATTACCCTTGTGTAAGTTATTTCTTCCATCTTCTGATAGCAATTTCCTGAATGCCTG
A_23_P144916	0.313	0.00737052	-3	-2.3401	-0.788	A_23_P144916	NM_005110	CATAGTAAAACAGCTTGAAATATCCCATGCAAGAGAGTAGTTTCAAGTGGGCAACTCTGC
A_24_P126139	0.313	0.00739059	-2.99	-2.3424	-0.262	A_24_P126139	NM_016370	CTTCATCATAAAGACCTCTATCAACTCACAAAAGTATTTGTCTCTATTAGAGTGGCATGT
A_23_P204847	0.313	0.00739818	2.99	-2.3432	8.29e-01	A_23_P204847	NM_002298	ACGCCCTCTATCATGGTGAAAAGCTCCATCAATGAGGTATCTTCTTTAGTGGTGGTATGT
A_24_P70993	0.313	0.00740097	-2.99	-2.3436	-0.33	A_24_P70993	NM_002414	CTAGTTCCTCCGGTAGCTTTTCAGATGCTGACCTTGCGGATGGCGTTTCAGGTGGAGAAG
A_24_P941188	0.3131	0.00741347	2.99	-2.345	2.72e-01	A_24_P941188	NM_015207	CCACGGATTGTGTTCATCTGAACCATTTTATTTTTTATTTACCAAAGTACTGTACTTGGC
A_23_P374695	0.3134	0.00743938	2.99	-2.3479	3.73e-01	A_23_P374695	NM_000459	AAAGTTTTAGTTTTGATGAGTTGTGAGTTTACCTTGTATACTGTAGGCACACTTTGCACT
A_24_P365954	0.3134	0.00744162	-2.99	-2.3482	-0.267	A_24_P365954	NM_020457	TCTGATGGAAGTGAAGATGAAAGAGATGAAAGGCAGCATTCGCCACCTGCGTCTCACTGA
A_23_P319598	0.3136	0.00746233	-2.99	-2.3505	-0.217	A_23_P319598	NM_000716	ACCTGGTAGGAAAGAAGACCCTTTTTTGCAATGCCTCTAAGGAGTGGGATAACACCACTA
A_23_P118615	0.3136	0.0074815	-2.99	-2.3527	-0.384	A_23_P118615	NM_007168	TGATGGTTTATAAGTTGCCAGTGGAAGATGTGCAACCTTTAGCCCAAGCTTTCTTCAAAT
A_23_P167005	0.3136	0.00748352	2.99	-2.3529	3.00e-01	A_23_P167005	NM_014373	AGGCACAGAATGCTTATTCTCGTCACTGTCCTTTCTATGTCAGCATTCAGAGTTACTGGC
A_33_P3389634	0.3136	0.00749183	2.99	-2.3538	5.44e-01	A_33_P3389634	NM_001747	ATTCTGCCTCAGGGCCATGAGAGTCCCATCTTCAAGCAATTTTTCAAGGACTGGAAATGA
A_33_P3345643	0.3145	0.00752336	-2.99	-2.3574	-0.914	A_33_P3345643	XM_003403780	TCACAGCACTAGGAAATGGGAGCACAGTATTGGGAAATGGGAGCACAGTACTGGGAAAGG
A_23_P51745	0.3152	0.00755147	-2.98	-2.3605	-0.531	A_23_P51745	NM_032414	TTCATCTTCCCTCGATTGGTTAACTCCTTAGTTTCAGACCACAGACTCAAGATTGGCTCT
A_33_P3376873	0.3156	0.00757197	2.98	-2.3628	4.07e-01	A_33_P3376873	BC041650	ACTTGTACAAGACCACACAGCAGGCAAGGGGTAGGATTAGAAGTCAGCTATGCTTCATTA
A_23_P370588	0.3161	0.00759482	2.98	-2.3653	9.62e-01	A_23_P370588	NM_024016	GCTGTGGGCAATTGTTACAAGTGTTCTTAGGTTTACTGTGAAGAGAATGTATTCTGTATC
A_23_P200001	0.3161	0.00760572	-2.98	-2.3665	-0.648	A_23_P200001	NM_144573	GCGGGGCCAAAAAAGGAAACCAGGAGTGCCACTATGCTGACTTCTTATTCCTTTTCATAA
A_23_P209944	0.3167	0.00763194	-2.98	-2.3694	-0.478	A_23_P209944	NM_017750	TCTACACTGTCAAGGGAAAAGGGAGACTAATGAGGCTTAACTCAAAACCTGGGCATGGTT
A_32_P116271	0.3168	0.00764542	-2.98	-2.3709	-0.234	A_32_P116271	NR_015359	AAGAAACTGGGCAAGCCAATGAAAGTCTCTGGGGATCATGGGAATTGAGTGTCTATGAAA
A_32_P54274	0.3169	0.0076646	-2.98	-2.373	-1.09	A_32_P54274	NM_000798	CCTCACCCCATTGATTGATAGTTCAAAGAATTGGCAGAAGCAGTTGCAATAAACTCAGTC
A_33_P3319491	0.3169	0.00766961	-2.98	-2.3736	-0.338	A_33_P3319491	NM_015878	GCTGTTCTATAAGAAATAGCTCAGAGTTGCAAATATCACATGTGAATGATACGGTAACTT
A_23_P307955	0.3169	0.00768125	2.98	-2.3748	1.93e-01	A_23_P307955	NM_031244	TGGAATAATGTTCTCTGCTACTTTTAACCTGATTTTCTTTGTACCTAAATAGGCAGCTAG
A_32_P62963	0.3181	0.00772327	2.97	-2.3794	3.52e-01	A_32_P62963	NR_029392	TGGCGTGGACCTGAGCTGCATCCTGAATGAGATGCGCAACCAGTACGAGCAGATGGCAAA
A_24_P98277	0.3181	0.00776402	-2.97	-2.3839	-0.246	A_24_P98277	NM_001002296	AGGTTGTTTGGCTTGTTTAACAGCATATACCATCTTCCTATGCATGGAAACTCATTATGA
A_23_P54291	0.3181	0.00779642	-2.97	-2.3874	-0.31	A_23_P54291	NM_017434	AGTCTAACACCACAACTAATTTCACCCAAGGTTTTAAGCACGTTCTTTCATCAGACCCTG
A_33_P3323914	0.3181	0.00780977	-2.97	-2.3888	-0.545	A_33_P3323914		ATAGGGAAGCCCATGCCGGAGCTGAAAACCTGCAACAACAAAAAAGCATCTAAATACTGC
A_23_P32165	0.3181	0.00781837	-2.97	-2.3897	-0.977	A_23_P32165	NM_004789	TGGCTAGAGCTTCTGTATTTTCAAAGACTGCCACGTGCCTTAGGAATACTGTTTTATCTC
A_23_P108404	0.3181	0.00781894	-2.97	-2.3898	-0.27	A_23_P108404	NM_001037131	CCCTATGATGGTGTGTGTCAAATCAGTTGTAGCTAATCTGTCCAGGGAGAATACTGGCTT
A_23_P34142	0.3181	0.00782867	-2.97	-2.3908	-0.296	A_23_P34142	NM_016303	GATGAGATAAGGAGAGTCAGAAACAAACTTATAGTGATGCGTTGGAAGGTTAATCGAAAC
A_23_P337729	0.3181	0.00783507	2.97	-2.3915	2.21e-01	A_23_P337729	NM_024789	TGGTTTCTCTGAGAGGTTTCTCTGCTTCGGCTGTGCTTGAAGTGGCATGCCTCCTCTGCT
A_23_P433016	0.3181	0.00784504	-2.97	-2.3926	-1.15	A_23_P433016	NM_001996	GGCTCTCTGTGGATGGCAGGTCATGTGAAGACATCAATGAGTGCAGCAGCAGCCCCTGTA
A_23_P50678	0.3181	0.00784882	2.97	-2.393	5.56e-01	A_23_P50678	NM_139355	TCCGTACCCTAAAATGTCACTGAAAGAGGTGTCGGAGGCCGTGGAGAAGGGGTACCGCAT
A_24_P90097	0.3181	0.00784966	-2.97	-2.3931	-0.45	A_24_P90097	NM_016824	GGTGAGTTGGCATGCAAAAAATTACATTGATTACAGTGTGTTTTGGAGCTGGCTCTGTTT
A_23_P436353	0.3181	0.0078589	2.97	-2.3941	2.87e-01	A_23_P436353	NM_001207008	CTATGAGAAAACATCAAAACTGCTGTAGTTTTCCATTTCTACTGTATTTCAGTTGCAACC
A_23_P116168	0.3181	0.00786608	-2.97	-2.3948	-0.211	A_23_P116168	NM_032424	AGAGAAGTGACACAGAGTAAATGGCTGATCTTCTATATTGTAGTATATTTTGTCCTTCCC
A_23_P210445	0.3181	0.00787666	2.97	-2.396	2.44e-01	A_23_P210445	NM_032107	CATTGCTTAACGATGGGGATACATTCTTAGAAATGTGTCACTAGGCAATTCTGTCATTGT
A_24_P59220	0.3181	0.00787686	-2.97	-2.396	-0.331	A_24_P59220	NM_001099771	GAGCAAAAGAGGCATCCTGACCCTGAAGTACCCCATGGAACACGGCATCATCACCAACTG
A_24_P279797	0.3195	0.00792907	2.96	-2.4016	2.71e-01	A_24_P279797	NM_001031727	TTTTATGTGTAAAGATCATAAAACGTTGTAAGTTTTCTAAAACACATAAGCTCTCAATAA
A_33_P3259423	0.3195	0.00793532	2.96	-2.4022	2.36e-01	A_33_P3259423	NM_017706	CTTTGGCTCAGCTGCCCTTCCCCACAAATAAAAACCAACAAAGAGGACAAATCAGGACAA
A_23_P148519	0.3204	0.00796737	2.96	-2.4056	3.14e-01	A_23_P148519	NM_014138	AATGTGGAATGAGAACTTGGTGGTTCACCGCTGTACTATTTGTGTAAATGTTTACGTATG
A_23_P2922	0.3205	0.00799051	-2.96	-2.408	-0.212	A_23_P2922	NM_016586	TCTGTGAAGTCAAGGTTTATTTTCACATGAGTCCAGCTTGCAGCAAGTAATCTTCAAATA
A_23_P144959	0.3205	0.00799243	-2.96	-2.4083	-0.534	A_23_P144959	NM_004385	ACTTCCTGTGCCTTTCCTATCACCTCGAGAAGTAATTATCAGTTGGTTTGGATTTTTGGA
A_23_P22672	0.3237	0.00809896	2.95	-2.4194	2.67e-01	A_23_P22672	NM_001099922	TAATACTGGATGTATGTAAGTGTTTTACTGCACTGTATTGAATTGGTGTCTTTTGCACAG
A_33_P3307990	0.3237	0.00811292	-2.95	-2.4208	-0.199	A_33_P3307990	NM_006610	TTTTTAGAAATGCCTGTGAAGACCTTGGCAGCGACGTGGCTCGAGAAGCATTCATCATTA
A_33_P3214119	0.3237	0.00812454	2.95	-2.422	2.52e-01	A_33_P3214119	AK311414	GGTCACTGTCAATATCTTGTTATGGTTTGATGGCCTTGGAGATTTAAAACCGAGTAAAAG
A_33_P3262449	0.3237	0.00813001	-2.95	-2.4226	-0.446	A_33_P3262449	XM_002343322	AGTTCTTTGTAATATGAGCCACACTGGCAGTGTGGAGCCTGCAGGAGGAGAGGCTGGGGA
A_33_P3211260	0.3237	0.00813103	2.95	-2.4227	5.37e-01	A_33_P3211260	AB209486	AAATGACAGACGCACTCGGGACAACAACTTGGCTCTTATGAAATAAACATATACTTACCA
A_33_P3256695	0.3245	0.00816098	2.95	-2.4258	3.02e-01	A_33_P3256695	NM_017892	GTTGCTGGAGGCCCACGTTATGTTTTCTCAGTGTAATTCCTCTTTTTCTTGATAAAAAGA
A_23_P26994	0.3253	0.00819601	2.95	-2.4294	2.44e-01	A_23_P26994	NM_031498	CCTTCTCTTCATCACAGAATGAGTAAAGATCCCTGAACAAATGCATTGTGAACCCATTCC
A_24_P927716	0.3253	0.00821223	2.95	-2.4311	4.22e-01	A_24_P927716	NR_003542	GGCATTGAGATGACTGACTTGTCAAATTAGTTCGGAAAGATTTTTGACAACTACTACAAG
A_33_P3337259	0.3253	0.00821541	2.95	-2.4314	3.59e-01	A_33_P3337259	NR_033266	TGCTGGAGGACCCTTTACAGCAGATGAAGGCCTCTCCCCAGCCAGAAAAGATGGAGCACA
A_33_P3481674	0.3266	0.00825921	-2.94	-2.4359	-0.382	A_33_P3481674	NM_207386	CCTGTCAAAGCACATTCTACATGTACTGTAAACAGATACACTTTAGTAAGACTTAGTCTT
A_23_P87150	0.3279	0.00830412	2.94	-2.4404	4.38e-01	A_23_P87150	NM_004811	AAATTTAAACCAAGAGAGGAGAGGAAAGGGTAAATTTTCTGTTACTGACCTTCTGCTTAA
A_33_P3414922	0.3283	0.00832486	2.94	-2.4425	2.50e-01	A_33_P3414922	BC070144	ATATTAAGATGCTCTTCTTGTTAAAACCAATTAACAATTAAACATTCTCTGTTACGATAA
A_23_P159839	0.3283	0.00833865	-2.94	-2.4439	-0.336	A_23_P159839	NM_152692	TCCAAATCAGATGCATGTGATGATGTATGGGGTATACCGCCTTAGGGCATTTGGGCATAT
A_23_P320250	0.3288	0.00836103	2.94	-2.4462	3.05e-01	A_23_P320250	NM_025109	AAATTGGCGCTGGAATTTGGGCTGGGAAAAATCTTGTGGTTATTTCCTTTAAAAAGGAAC
A_33_P3365924	0.3289	0.00837579	2.94	-2.4476	2.15e-01	A_33_P3365924	XR_132982	AGTGAGAGCCCAACTTGGAAGCTTTTACTCCTGGGAGTCCGAGAGCTCACTCCCTTCCAC
A_23_P94434	0.3295	0.00840233	-2.94	-2.4503	-0.649	A_23_P94434	NM_001039792	CCCCAGTGTACTATGGCAGCAGAGAATGGAGGAACACTGGGTCTGCAGTGCTGAAGGGTT
A_33_P3312466	0.3295	0.00841523	2.94	-2.4516	5.77e-01	A_33_P3312466	NM_152547	GGGAGAAGGATACACCAAAAAACTAAGTGATTATCTTTGGATGGGAAAATGTTTGGTAAT
A_24_P136551	0.3307	0.00846363	2.93	-2.4564	4.01e-01	A_24_P136551	AB040932	ACAAAGATCAGCTCAGGATGGGTCATAGGCCTAATGGTAAAAGGTAAAACTGTGAGGCAG
A_23_P353888	0.3307	0.00846934	2.93	-2.457	2.56e-01	A_23_P353888	NM_203447	CAAGTTTTTAGCTGACTACAAAAGATCATCATCCTTACAGAGACGAGTCAAGTCAATTCC
A_24_P157926	0.3307	0.00847915	2.93	-2.458	3.67e-01	A_24_P157926	NM_006290	CCTTATGAAACTCCAGCTATGTAATAAAAAACTATACTCTGTGTTCTGTTAATGCCTCTG
A_33_P3215883	0.3307	0.00849059	2.93	-2.4591	3.30e-01	A_33_P3215883	NM_002019	CCAGAGTTAGGTTGTCTCCAGGCCATGATGGCCTTACACTGAAAATGTCACATTCTATTT
A_23_P306655	0.331	0.00851374	-2.93	-2.4614	-0.182	A_23_P306655	NM_198722	ACACAGTGAAGGGGATCATGGCCTGCACCCCTGCTTTTCAGCAGTAAAAAGCCCGAAAAG
A_24_P364838	0.331	0.00853238	2.93	-2.4632	7.21e-01	A_24_P364838	NM_004785	GCGAGGGCCTTTGCTGCTCTGCCGGGGCCTGCTGACTGAAAGGAATTTGTGTTTTTGCTT
A_23_P170888	0.331	0.00853512	-2.93	-2.4635	-0.331	A_23_P170888	NM_001039350	TTGGGGACGTTCCTAAACACTGAGGGGGAAGACAGCCAATAGCACCCATTAAAAGAAATA
A_32_P41375	0.3315	0.0085646	2.93	-2.4664	5.32e-01	A_32_P41375	NR_024368	GCTATTTTCCGAAAAGTGAAAAGCTCTGAAGGTCCCACAATTCATGGTATGTACAGGGGC
A_23_P83798	0.3315	0.00857922	-2.93	-2.4678	-0.543	A_23_P83798	NM_006982	GGATGCAAGAGAAGGGAGAGCTGGATGAACTTGGGGATAAATGTGATAGCAATGTATCCA
A_33_P3326588	0.3315	0.00859262	2.93	-2.4691	3.21e-01	A_33_P3326588	NM_003840	CGGGCCAAATAGCACATAACACCTGGTTATATATGAAATACTCATATGTTTATGACCAAA
A_23_P209347	0.3315	0.00860439	2.93	-2.4703	2.76e-01	A_23_P209347	NM_153697	GCTGCAAGATACGGTCATGAGCTTTTGATTAACACCTTAATAACCAGCGGAGCTGACACA
A_23_P133075	0.3315	0.00860535	-2.93	-2.4704	-0.273	A_23_P133075	NM_033115	TCCCATTAAATGACCTGAAGTCAGAAGTATCACCACGGATTTCAGCAGAGGACCTGATTG
A_23_P359897	0.3319	0.0086437	2.92	-2.4741	3.23e-01	A_23_P359897	NM_030647	TTGTAGTAACGTTTTGCTAGCCTGACTGACTTTTCTTACTGGTTTTTATGCCCACGGTCC
A_33_P3304304	0.3319	0.00865095	2.92	-2.4748	2.45e-01	A_33_P3304304		TCTGTCTGTAGCCTAGCGCGTTGCGTTTAAGGGTATATCTGAACTTATTTTGTTAAAAAA
A_33_P3406843	0.3319	0.00865121	-2.92	-2.4748	-0.479	A_33_P3406843	NR_033906	GGAGGAGACAAGAAAAAGATCAAGATCATCAGTATCTAAAAAGAACGGTCAACAAGGCCT
A_23_P50508	0.3319	0.00869345	2.92	-2.4789	4.47e-01	A_23_P50508	NM_003706	TCCAGATGGCCAGAATGAATGTGATAGTTCAGACCAATGCCTTCCACTGCTCCTTTATGA
A_23_P397238	0.3319	0.00870413	2.92	-2.48	3.86e-01	A_23_P397238	NM_054014	TGAGTATCCTTTCAGTGTTATTAGTGTATGCTTTGAATGTAAAAATTGGTCACCCTAAGG
A_33_P3289296	0.3319	0.00871887	2.92	-2.4814	3.22e-01	A_33_P3289296	NM_183240	AGCACGTCTGTACTTCTGTTCATTAAAGTGCTCCCTTTCTAGTCCTTTTTCTGCCCAGAA
A_24_P709476	0.3319	0.00872582	-2.92	-2.4821	-0.317	A_24_P709476	NR_015399	ATACTTGAAATATCCAATAGGAAGCATTCCACCTTTGTGCAAATGCGAACCACATCTCAC
A_24_P83808	0.3319	0.00872665	-2.92	-2.4821	-0.209	A_24_P83808		GTAATAACTGGAAGTGAAAGTCCAATTGTGTTGCTCAGTGGCAGCATGGAACCTGCATTT
A_32_P149298	0.3319	0.0087429	2.92	-2.4837	2.75e-01	A_32_P149298	NM_001129993	AATGAAGCTAGATGTTATTTGATAACTGGCTTTGCCAAGGTTTTTGAACTGCTGTTTAGA
A_24_P783008	0.3319	0.0087516	-2.92	-2.4845	-0.194	A_24_P783008	NM_001102659	AGGAAGAGAAAATCTCAGCAGCGCAGCCACAGCACACAAGGAGTAAACAAGGTACATATT
A_24_P499215	0.3319	0.00875275	2.92	-2.4846	2.84e-01	A_24_P499215		TCAAAGACAAGAGAAAGCAAAAGCCTCCAAGCTCTCCAAAAAGAAAGCATCTGCCCTGTT
A_23_P111843	0.3319	0.00875506	2.92	-2.4849	1.98e-01	A_23_P111843	NM_006349	AGGGAGGAGCCGCTCATTCACCCAACAAAACTGTGTCTTATCTGCCAGGAAAGACCAGCC
A_23_P120125	0.332	0.00876942	-2.92	-2.4862	-0.536	A_23_P120125	NM_199235	CAATGTCATTATGTAATTATTACCCAGAATTGCTCTTCCATAAAGCTTGTGCCTTTGTCC
A_33_P3422374	0.3321	0.00878482	2.92	-2.4877	2.79e-01	A_33_P3422374	NM_001010868	CAACTCTTGATTAGAAGTCTTCAGTTGAAATTCCACTACAAAAGACATCATTCCAGACTA
A_33_P3277514	0.3325	0.00880527	2.91	-2.4897	6.45e-01	A_33_P3277514	NM_000061	CGAATTTGGCAAGAATGAAATGGTGTCATAAAGATGGGAGGGGAGGGTGTTTTGATAAAA
A_33_P3301851	0.3328	0.00882599	2.91	-2.4916	2.72e-01	A_33_P3301851	NM_002419	TCTTAGCCTCGGGATCCAGTGAAGCCAGAAGCCAAATAAACTCAAAAGCTGTCTCCCCAC
A_33_P3377786	0.3338	0.00886319	-2.91	-2.4952	-0.501	A_33_P3377786	XR_133064	CGCCAGGGCCCCAGAGGCCATGACCACCACCAGCACCACCACCCCTTCTGGGGTCCCTCC
A_23_P14673	0.334	0.00888924	-2.91	-2.4976	-0.398	A_23_P14673	NM_020962	CTGAGTCTCAATTAAAAATCTTCCTTTTCTTGATGCATGACAAGTGTAATCAGTACTTGC
A_33_P3293918	0.334	0.00891117	2.91	-2.4997	4.18e-01	A_33_P3293918	NM_170600	CCATCTCACTGTAAATAAGTCTCTGTTCTGTAAATAGATGTACAGAAGCCATGTTATTTC
A_33_P3364741	0.334	0.00891669	-2.91	-2.5002	-0.755	A_33_P3364741	NM_006039	ATGTGAACATGGACTCGAAGACATGGCCCTTTCTCTGTAGTTGATTTTTTAAATGTGCCA
A_33_P3246663	0.334	0.00892443	-2.91	-2.501	-0.314	A_33_P3246663	NM_001101387	GGGAGAATTTGATCTAACCCGAAGCCTAAAGGAATCAATGTAATGTTGAATTGTATTCTA
A_33_P3256868	0.334	0.00892779	2.91	-2.5013	4.06e-01	A_33_P3256868	NM_001242531	CAATTCATATCTTGTACGTCATCAGAGATTTCATGCCGGAAAGAAATCTAACACATGTAA
A_33_P3268838	0.334	0.00894047	-2.91	-2.5025	-0.4	A_33_P3268838	NM_030594	TATGCAGGCAAGACTGCACTCTCCTACAGATGTGTGGAGTAAGCTGTGGTGTAGTTTTTT
A_23_P19115	0.3342	0.00895626	-2.91	-2.5039	-0.172	A_23_P19115	NM_018094	AAATTGGTCCCAGAGAAGGACTAAGCAATTTTCTTGATGCCTCTGCAAGATACTGTGAGG
A_33_P3337277	0.3355	0.00902218	2.9	-2.5101	3.84e-01	A_33_P3337277	AK124859	CACCTGCTCTCCTAACATGTTTTCTTTCTGTTTCAGGCTTGAAAAACCCTTGCCCAGTTT
A_33_P3304668	0.3355	0.00904756	-2.9	-2.5125	-0.88	A_33_P3304668	NM_000088	GGTGGGAGGAAGCAAAAGACTCTGTACCTATTTTGTATGTGTATAATAATTTGAGATGTT
A_32_P170749	0.3355	0.00905084	2.9	-2.5128	4.76e-01	A_32_P170749	NM_012447	GTCCCAAGCGGTACATCGTCATAGCCGGAAACAGTCAGAGCCACCAGCCAATGATATTTT
A_32_P161033	0.3355	0.00905587	2.9	-2.5132	4.95e-01	A_32_P161033	BC043411	AGATACTACTTTTTCAAAAAGTCACCCAGGAATTGTTAGTGTTGAACGACTCGATACTCG
A_33_P3405459	0.3355	0.0090584	2.9	-2.5135	2.53e-01	A_33_P3405459	NM_024059	CTCAGCCACTCTGTCTGAGAGATGATTTTCTAATATTTATCCACTAATAAAGAAGAGTGT
A_33_P3368339	0.3355	0.00906089	2.9	-2.5137	2.46e-01	A_33_P3368339	NM_001045477	CAGGTGGCTGCCCTTTTGTAGCTGCACTTTGATTCTAACTTCAGCATCCCATGATGTCCT
A_23_P81280	0.3356	0.00907525	2.9	-2.515	5.94e-01	A_23_P81280	NM_152547	CTCCTCTTGAGCCAGAAGAAAGAGTTGGTGGTCCAGATAGCAGACGTGTTCGTACCCGGA
A_33_P3210810	0.3358	0.00910909	2.9	-2.5182	5.27e-01	A_33_P3210810	BC000988	ATGATGCTAACGTGTATCCTGGATCCCTGAGGTCCGCTCCCAACATCAGCCCTTCAGCCT
A_33_P3376379	0.3358	0.00910939	2.9	-2.5182	4.02e-01	A_33_P3376379	NM_001139459	CAAAACACCCTTTGTGAAGCCTCCAGAGATGAACAGGCCTTCTTGGGAAAGGACAAAAAA
A_23_P43810	0.3358	0.00911574	-2.9	-2.5188	-0.569	A_23_P43810	NM_206943	CATATGTAAAATTCAATGGAAGAGAGGTGGAACAGTGCTGTTATTTTAAACAGAAGGTTG
A_33_P3221064	0.3369	0.00915975	-2.9	-2.5228	-0.373	A_33_P3221064	NM_001042544	GGGGCCCCTTTACATGCCCTCTCCCTTTTATAAAATTTTCCATTAAAAACCACCTATTTT
A_24_P11315	0.337	0.00917864	-2.9	-2.5245	-0.746	A_24_P11315	NM_020190	TACGGCTTGACAGCAGACACCTACATCGACCTGGCAGCTGATGAGGAAGGTCTTTGGGCT
A_23_P132159	0.337	0.00918636	-2.9	-2.5253	-0.611	A_23_P132159	NM_017414	CTGTCATTTTCCATTTCCGTTCCTGGATCTACGGAGTCTTCTAAGAGATTTTGCAATGAG
A_23_P150457	0.3381	0.00923505	-2.89	-2.5297	-1.03	A_23_P150457	NM_006691	CTCTGTAAAGCTAAAATAAAGAAATAGAACAAGGCTGAGGATACGACAGTACACTGTCAG
A_33_P3228285	0.3381	0.00924002	2.89	-2.5301	3.24e-01	A_33_P3228285	NM_207354	AATTTATTTATTTATAAACTCTCTGCTGCTGAGCTTGGGGCCTGGAGCCCCAGGAATGAG
A_33_P3407780	0.3385	0.00927366	2.89	-2.5332	2.73e-01	A_33_P3407780	NM_014634	AGGCAGTCTCCCAAGGACCCACCATGCAGAAGTGTCAATAAACCACAAGTTCTGAACTCT
A_23_P44112	0.3385	0.00927417	2.89	-2.5332	3.82e-01	A_23_P44112	NM_014387	CCTACTCTGTGTAATAGAATAAAGGCCTGCGTGTGTCTGTGTTGAGCGTGCGTCTGTGTG
A_23_P147255	0.3387	0.00931143	2.89	-2.5366	2.99e-01	A_23_P147255	NM_020528	GCATGCAGTGGTAATTATTTTAGAAATATTGTTCCTTGGTGTCAGCGTAGCTGTCTGTCT
A_24_P177585	0.3387	0.00931206	2.89	-2.5367	2.12e-01	A_24_P177585	NM_182625	CCCAGATTCAACAAAAAGTTCTCTGAGTTCTCTACAATGTCATAAGAAAGAAAACAACTC
A_23_P66432	0.3387	0.00931544	2.89	-2.537	2.84e-01	A_23_P66432	NM_032646	TCATTCCTTACCCTGGTTAGGTCACTACTTTTGCAGATTTTGCTGGCACTGATCTGGAGA
A_33_P3315288	0.3391	0.00933681	-2.89	-2.5389	-0.319	A_33_P3315288	NM_175078	TAATTTTGAATCTTATGTAAGAGGCTTGAGATGTGCTGGAGAGGGCAGGAAGAGGAAAGT
A_24_P391230	0.3391	0.0093502	2.89	-2.5401	2.88e-01	A_24_P391230	NM_052954	TTGTATTAAGTGTCATAATAGCATCAATGTGCACATTACCAGTATAGACTGTTGGAGTTC
A_24_P195669	0.3393	0.00937477	2.89	-2.5423	4.85e-01	A_24_P195669	AK074680	AGTGGGTAGATCCCCACTGTGTAGATGAGAAAGCTGAGACATAGAGCTTCTCCACTCTCC
A_33_P3321697	0.3393	0.00937781	2.89	-2.5426	3.32e-01	A_33_P3321697	NM_022140	TCATCGTGTTCTCAGCTCCTAGTACAGTGCTTTCAATAAATTTTTTGAATACCTCTATAC
A_23_P372925	0.3396	0.00939969	-2.89	-2.5445	-0.302	A_23_P372925	NM_033426	TGATGGTTTTAGCGATGAATAACGTAATTGGCTATGAAGTACTGTGGCAGAGCTGCTGTT
A_33_P3352268	0.3401	0.00942969	-2.88	-2.5472	-0.494	A_33_P3352268		AAACATGCATCCCAACACACACACTGGCACATGTGCACACATCACACCGATGCACATGGA
A_33_P3221999	0.3401	0.00943632	2.88	-2.5478	1.14	A_33_P3221999	NM_001165958	CAAAACCAGCCTGGATTTCATACATGGACTTCTGATTAAAAGTGGCAGGTTGTGCATGTT
A_33_P3372844	0.3402	0.00945618	2.88	-2.5496	2.25e-01	A_33_P3372844	NM_019082	TCCTTGGCACTTCCAAGCTGGCATCTTGCCCCTTGACAACAGAATAAAAATTTTAGCTGC
A_33_P3346663	0.3402	0.00946641	2.88	-2.5505	2.05e-01	A_33_P3346663	NM_004069	TGTCGTGTGATGCCATAAGCGTCTGTGCGTGGAGTCCCCAATAAACCTGTGGTCCTGCCT
A_33_P3328937	0.3402	0.00947873	2.88	-2.5516	3.71e-01	A_33_P3328937	NM_001112707	CCCGACAAAAAGCAGAATGATCAGCGAAATCGGAAAAGAAAAGCTGAACCATATGAAACT
A_33_P3420380	0.3402	0.00948731	2.88	-2.5523	3.96e-01	A_33_P3420380	NM_001001851	TACCTCACCACAAAGGAGCTGCTGAGCTCCTGGCTGCAAAGTGACGATGAACCGGAGAAG
A_23_P162037	0.3406	0.00950956	2.88	-2.5543	5.18e-01	A_23_P162037	NM_001030273	TAATCATTGTGCACAGAAGCATCATTGGTAGCTTTTATATGCAAATGGTCATTTCAGATG
A_33_P3316978	0.3409	0.00953062	2.88	-2.5561	3.90e-01	A_33_P3316978	NM_207396	CACACTGTGGTTGAGTGAAATCAAGTGCAGTTTTATTTAAGAACTGGAAAGAATAATCAG
A_23_P370544	0.3413	0.00955276	2.88	-2.5581	2.76e-01	A_23_P370544	NM_144708	CAACTTGGGAAACATGTCCAGAAAGCCAACCCAGAGCCTGCAGAAGGCTAATAAAACATT
A_33_P3388501	0.3428	0.00960695	2.88	-2.5628	1.28	A_33_P3388501	NM_003465	TTTTTTCTGGGTCTCCTGGGCTGCCCCTTTCACTTGCAAAATAAATCTTTGGTTTGTGCC
A_33_P3419139	0.3428	0.00963484	2.87	-2.5653	2.28e-01	A_33_P3419139	NM_001127211	CAACTCAACACAAGGAGGATGAAGGCGAAATTCAACCAGAAAACAAAGAAGACAGCATTG
A_23_P124905	0.3428	0.00965051	-2.87	-2.5666	-0.57	A_23_P124905	NM_002522	TCAACTAACGATGGGAAATGTATTACTTCCGTACACAGTGGACTGAAGTGCAATTTGTTG
A_32_P515431	0.3428	0.00965066	2.87	-2.5666	2.32e-01	A_32_P515431	XR_110830	CAAGATTAAGTTAGAATAACACTGCTGTAGACTGTTTATCAGCTCTTCAGCATATGTCCA
A_33_P3772150	0.3428	0.00965458	-2.87	-2.567	-0.514	A_33_P3772150	NM_018702	CCCAGTGCCTCTTTTCACACAGGCCCTAGATTTCTATCTCTCTGCAGTTTATGCATCGGT
A_23_P144453	0.3442	0.00970833	-2.87	-2.5716	-0.264	A_23_P144453	NM_033296	AATTTTTGAGGTGCTTTGCTATTTCTTGTGTGACCTGATAGCTCCCTGGAACTTTGGGTC
A_23_P257201	0.3444	0.00972868	-2.87	-2.5734	-0.262	A_23_P257201	NM_030963	AGTGAGTGTCAGTGTCAGATCTAGAAGGCCTGATGGACAGTGCACAGTAACTGAAGTTTA
A_33_P3331242	0.3444	0.00976642	-2.87	-2.5767	-0.236	A_33_P3331242	NM_005754	ATTTTGTTATGGTTCTCTTTTATTGATGGGCATGCAGTGGGTGTTACTTGGAAATGGCCA
A_33_P3364571	0.3444	0.00977244	-2.87	-2.5772	-0.42	A_33_P3364571	NM_019105	CATCTGTACGGCCTCCACGAGGGGCAGCGCGTGGGCCCAGTGTCCACCGTGGGCATCACG
A_33_P3331491	0.3444	0.00979955	2.87	-2.5795	4.32e-01	A_33_P3331491	NM_001162371	CCTGCATATTATTTACTTGCAAATGTCTGTAATCTGTAATTGTGATGCCTCTGATGGAAT
A_33_P3280237	0.3444	0.00981013	2.87	-2.5804	2.60e-01	A_33_P3280237	BI916123	GTGCTCTTGTTCTGTCAAAGAACCTTCAACACAGAAAAATACAAAAATGAGGGAAATGTA
A_32_P36694	0.3444	0.00981046	-2.87	-2.5804	-0.314	A_32_P36694	NM_175061	CAGGTAAGGATGGGAATATTTTGTTATACTGTGTATAGTGAATGTATTGTACTGTGTCTG
A_33_P3353170	0.3444	0.0098127	2.87	-2.5806	2.26e-01	A_33_P3353170	BC051800	AGACTGTGCCTCAAAATAGAATACAACAAGCTTCTAAAGTGCAAAAGGCTTTCTAAGAAA
A_23_P258221	0.3444	0.0098875	2.86	-2.587	4.18e-01	A_23_P258221	NM_005688	TCGCCTTAGCATGTTTGCTGAACACCTTGTGGAAGCAAAAATCTGAAAATGTGAATAAAA
A_23_P65757	0.3444	0.00989162	2.86	-2.5873	2.69e-01	A_23_P65757	NM_004701	TTGATTTTGTACATAGTCCTCTGGTCTATCTCATGAAACCTCTTCTCAGACCAGTTTTCT
A_33_P3350232	0.3444	0.00989653	-2.86	-2.5878	-0.247	A_33_P3350232	AK127825	TTGTATGTATACATGTGCATGTGTGTATGTGTGCGGGTCCATGTGAGATCAAGGGAAGAG
A_33_P3263392	0.3444	0.00990069	2.86	-2.5881	1.92e-01	A_33_P3263392	AK126149	CTGCATTTTTCCCCATAAAAACCAGTGTTTTGTATTTGTAAGAATGTTGCTGTGTAATCC
A_23_P356554	0.3444	0.00991175	-2.86	-2.589	-0.443	A_23_P356554	NM_004282	ATCACAAAACAAGAATCTTTCCAAAGTTGTCTCATTCAGCAATGTTAAGGCATCTGTATC
A_23_P69310	0.3444	0.00991764	2.86	-2.5895	4.80e-01	A_23_P69310	NM_003965	GTGAGCTAACATTTGCTAAGCACTGAATTTGTCTCAGGCACCGTGCAAGGCTCTTTACAA
A_23_P109895	0.3444	0.00992558	2.86	-2.5902	2.30e-01	A_23_P109895	NM_001040454	GGCTGGGCACTTCTTCGATGCATCCATCACCAAGAAGCATCTCTTTGCCTCTGTCCATGA
A_23_P128817	0.3444	0.00993667	2.86	-2.5912	5.47e-01	A_23_P128817	NM_004563	CTGGGCAAACCCTGGAAACCTGGTGACAAGGAGCCCTGTGCACATCCCAACTCTCGATTT
A_23_P388146	0.3444	0.00994933	2.86	-2.5922	5.67e-01	A_23_P388146	BC011243	TTGAACACACATGCTACCAAGCTCTGGGAAAACCCCATAGCTTTAAGAAGTACCTGCAAG
A_33_P3414389	0.3444	0.00995409	2.86	-2.5926	3.81e-01	A_33_P3414389	NM_020979	ACGCCAAGCTCTTCAGTGAAGACACGATGTTATTAAAAGCCTGTTTTAGGGACTGCAAAA
A_23_P212050	0.3444	0.00997199	-2.86	-2.5941	-0.406	A_23_P212050	NM_000055	TTCCCCCCAAAATTATCAGTGCTCTGCTTTTAGTCACGTGTATTTTCATTACCACTCGTA
A_23_P102000	0.3444	0.00997902	2.86	-2.5947	5.69e-01	A_23_P102000	NM_001008540	TGCTGGTTTTTCAGTTTTCAGGAGTGGGTTGATTTCAGCACCTACAGTGTACAGTCTTGT
A_23_P151805	0.3444	0.00998795	-2.86	-2.5955	-0.381	A_23_P151805	NM_006329	GGGAACCCTGGGAGTAGCTAGTTTGCTTTTTGCGTACACAGAGAAGGCTATGTAAACAAA
A_33_P3257568	0.3444	0.0100131	2.86	-2.5976	2.50e-01	A_33_P3257568	AK097636	GCAAAGTGTGTTTGTAAGGCTGATGTTTAGAACTGTGCAAGCATTCTCTTATTAAAATTC
A_23_P73801	0.3444	0.0100426	-2.86	-2.6001	-0.3	A_23_P73801	NM_001006640	GCCTTTAATTCTGTTTTGCCTGCTAATAGTATTGCCATTGCCACCTGGACTTTCTGTTTG
A_23_P355394	0.3444	0.0100449	2.86	-2.6002	3.56e-01	A_23_P355394	NM_145001	TGCGTTATCACCTGCAACAGAACGTCCACTTCAAGGAAGAAACAGTGAAGCTCTTCATCT
A_32_P135336	0.3444	0.0100466	2.85	-2.6004	4.76e-01	A_32_P135336	NR_002556	CGGGCATTCACTCTTTCAGCTCAGAGTTTCTCTTCCTTTCCAATACAGGCTCTACATGAA
A_33_P3404641	0.3444	0.0100553	2.85	-2.6011	3.07e-01	A_33_P3404641	NR_027034	CTGCTACCATCTTAATAACTTTTCTGGCAATACACGACGATGATTGTTTATGTTAATCTC
A_23_P34597	0.3444	0.0100623	-2.85	-2.6017	-0.287	A_23_P34597	NM_001785	AGAATGCCCACTGCCTGTAACAGCCACCTGGAGAACTTCATAAAGATGTCTCACAGCCCT
A_23_P215419	0.3444	0.0100772	2.85	-2.6029	4.59e-01	A_23_P215419	NM_004968	TGACCTCGACCCACTCTCAAATCCTGATGCTGTTGGGAAAACCGATAAAGAACACGAATT
A_33_P3210857	0.3444	0.0100837	-2.85	-2.6035	-0.526	A_33_P3210857		TTTTACGACCTTCTTAACACCGTCTGCGTATGTGCTAAGCAGTCTGAGCCAGTTCAGAAA
A_33_P3421163	0.3444	0.0100909	2.85	-2.6041	2.69e-01	A_33_P3421163	NM_033285	ATGGAAAACCTTCTCATTGAACATCCCAGCATGTCTGTCTATGCTGTGCATAACTCCTGC
A_33_P3344405	0.3444	0.0100928	2.85	-2.6042	3.92e-01	A_33_P3344405	NM_001145785	ATCCACCCTGGGGGGCTCCTTTCCTTCTTCCTATTTGTGTGTATATCCACAAATAAAACG
A_24_P184445	0.3444	0.0100964	2.85	-2.6045	3.29e-01	A_24_P184445	NM_002429	AGAGCCCTTCTTCCCATCAAAAAGGTATCAAATGCCTTGGAAGCTCCCTGATCCTACAAA
A_33_P3659678	0.3444	0.0101135	-2.85	-2.606	-0.378	A_33_P3659678	BC027988	CCGTCTTTGCCCTTTAATGACCATTGTTTTCTTTCTCTAAAATGTCTTGTAATAGGTGAT
A_23_P14986	0.3444	0.0101158	-2.85	-2.6061	-0.366	A_23_P14986	NM_000196	TGCAGATAGTGCCTCTGCAAACTAAGGAGTGACTAGGTGGGTTGGGGACCCCCTCAGGAT
A_33_P3362321	0.3444	0.0101422	-2.85	-2.6083	-0.37	A_33_P3362321	NM_201555	TACAGACTGCTATTCCAACGAGTACTCATCCAAGTGCCAGGAATGCAAGAAGACCATCAT
A_33_P3420078	0.3444	0.0101431	2.85	-2.6084	2.41e-01	A_33_P3420078		TGGTCCATTTGCTGCATCTGTTCCAAGAGGGAAGCTAAGGAGTTTAGTGAAACCAGTTGA
A_33_P3240234	0.3444	0.010153	-2.85	-2.6092	-0.277	A_33_P3240234		ATTTGCCAGCCGTTGGTGAGGGCAGAGGATGGAATTTCAACTCCCCAGCTCACGGGTCTT
A_33_P3369844	0.3444	0.0101607	-2.85	-2.6099	-0.809	A_33_P3369844	NM_013230	CTACATGGGAACAAACAGATCGAACAGTTTTGAAGCTACTGTGTGTGTGAATGAACACTC
A_33_P3290573	0.3445	0.0101758	-2.85	-2.6111	-0.437	A_33_P3290573	NM_017633	TTGGACTTCTTACCCGAGGGGGTGAACAAAGAGAAGATCACACCACTCACGCTCAAGGAA
A_33_P3331588	0.3449	0.0101977	2.85	-2.6129	2.72e-01	A_33_P3331588	NM_031921	CCCTGTCAGCTGGCCGGTCCAAGCCTGTGGCTGGAGCTGGTGTGTGTTTATCTAATAAAG
A_33_P3549091	0.3469	0.0102776	-2.84	-2.6194	-0.389	A_33_P3549091	NR_036551	TCTGAGGCTCTGTGAGTCTCATGCGAAGGATGCTGAATGCTTTGTAAAAATGCTTCTTGC
A_33_P3410584	0.3469	0.0102937	-2.84	-2.6208	-0.875	A_33_P3410584	AK057937	AGACAGGTAGATCAGTTGACCCCAGGAGTTCTGGGCAATACAGTGAAATTCTGTTTTCAC
A_23_P315286	0.3469	0.0103249	2.84	-2.6233	2.46e-01	A_23_P315286	NM_138774	ATGTTCCTGTTTCTTCATCGTTGAGCTTTTCTGGCCCGGTCTGAAGCTCAAGTGAGGAGG
A_24_P189997	0.3469	0.0103291	-2.84	-2.6236	-0.289	A_24_P189997	NM_138322	CATCATCGCCTTGGCTCTAGAAGCAAACAGCCAGTTAACCTGGAGGGACGTCCAGCACCT
A_33_P3405848	0.3469	0.0103429	2.84	-2.6248	5.54e-01	A_33_P3405848	NM_175719	GGATTACATCCCCAGGATCCTGGGACCCGAGGCCTTCCAGCAGTACGTGGGTCCCTATGA
A_23_P256735	0.3469	0.0103442	-2.84	-2.6249	-0.344	A_23_P256735	NM_016134	CTGTTTGGGCTGTTGTTTCTTATGTTGTTGCAGACATGGAAGAAATGCTGCCTAGGTCCT
A_23_P200138	0.3469	0.010347	2.84	-2.6251	8.17e-01	A_23_P200138	NM_020125	TGCACCAGGGCCTTGTTGAACAGATCCACACTGCTCTAATAAAGTTCCCATCCTTAATGA
A_33_P3369581	0.3469	0.0103541	-2.84	-2.6257	-0.225	A_33_P3369581	NM_003755	TATGAACAAACTCAAGGGCCAGAAGATCGTGTCCTGCCGCATCTGCAAGGGCGACCACTG
A_33_P3283709	0.347	0.0103693	-2.84	-2.6269	-0.372	A_33_P3283709		CACCACTCCTTTCACATACACGAAAGGCCTCACAGTGGAGAAAACCTCTATGAATGTTAG
A_33_P3250273	0.3471	0.010385	-2.84	-2.6282	-0.614	A_33_P3250273		AATATCCTTGTGATATGAGCCATGCTGGCAGCCTGAAGCCTGCACGAGAGGCTGGGAAGG
A_32_P169114	0.348	0.0104256	-2.84	-2.6314	-0.336	A_32_P169114	NM_001134407	TTTGTTCAATGTGTTATCAACTGTTTTAAGGAATGGGGATTGAAATTCGTGTGCAAACTG
A_23_P139919	0.348	0.0104374	2.84	-2.6324	2.93e-01	A_23_P139919	NM_018413	AGTCTACAAACTCGATTTTTTAATGTTCAATTACTCAGTGCCAAGCTACCTGAAATTGGA
A_24_P942517	0.3487	0.0104695	-2.84	-2.635	-0.277	A_24_P942517	AB032988	TATGTAGACTGTGACACTGTATATGTGTGACTCGTACAACTTTGACGTGTTTCTGAAGTG
A_23_P379034	0.3504	0.0105398	2.83	-2.6406	6.81e-01	A_23_P379034	NM_025045	ACACATGCCCTCTCTGTACATCTTTTGTAAATGATGAGAAATAAAGGAAGTGGACGCAAA
A_33_P3291976	0.3504	0.0105626	2.83	-2.6424	1.74e-01	A_33_P3291976	AK128828	AGTCCGAGGCTCCGGGCTGAACTTTGTTCGAATCCCGGTTCGCCCGTTGTCAGCACCTGA
A_32_P64200	0.3504	0.0105675	2.83	-2.6428	3.54e-01	A_32_P64200	NM_002098	ATGTGTAACCCCAATATAGAAACTAGATTAAAAGGGAGTCTCTCTGGTTGAAAGGGGAGC
A_33_P3217559	0.3504	0.0105715	-2.83	-2.6431	-0.275	A_33_P3217559	NM_003836	ATCGTGGCCAACAGCTGCACCCCCAACCCATGCGAGAACGACGGCGTCTGCACTGACATT
A_23_P66637	0.3515	0.0106255	-2.83	-2.6474	-0.584	A_23_P66637	NM_000023	AGGACATTCAGAATAAATATCTGCTGCTCTGCTCACCAATTGCTGCTGGCAGCCTCTCCC
A_33_P3363271	0.3515	0.0106288	-2.83	-2.6476	-0.224	A_33_P3363271	NM_000724	GGCAATTTTACTGTGAGTGTTTCACTGGAAATGTACAATCTTTGTGTGTTAGAGTATTTG
A_24_P303589	0.3515	0.010642	-2.83	-2.6487	-0.275	A_24_P303589	NM_003592	AGAAGCAGGAACAAGAAACCACACACAAAAACATCGAGGAAGACCGCAAACTACTGATTC
A_24_P829183	0.3522	0.0106856	2.83	-2.6521	2.02e-01	A_24_P829183	XR_108575	GCCATTGCTCAGTAGGAAAATGTCCTTTCTACAAGCATTCATATTTCAATAAAAATCTGC
A_33_P3359869	0.3522	0.0106988	2.83	-2.6531	3.53e-01	A_33_P3359869		TGTGTTTTTGAAACTAAATATAGCAGGTCATTAGTTACTTATAACTGGTGTTTTATTAAT
A_23_P64161	0.3522	0.0106989	-2.83	-2.6531	-0.669	A_23_P64161	NM_178127	TGGTCTAGCAAATCTAAATGGCATTCATCACTTCTCTGGAAAATTGCTTGCAACTGGAAT
A_23_P200780	0.3535	0.0107502	-2.82	-2.6571	-0.424	A_23_P200780	NM_003243	GGCCCTGAGTTTTACCCAGACTCAAGGAGTTGGTAAAGGGTTAATAGCCAGATAGTAGAA
A_23_P79518	0.3541	0.0107808	2.82	-2.6595	3.76e-01	A_23_P79518	NM_000576	GGAATCAATTCAATTTGGACTGGTGTGCTCTCTTTAAATCAAGTCCTTTAATTAAGACTG
A_33_P3413840	0.3548	0.0108151	2.82	-2.6622	1.72e-01	A_33_P3413840	NM_001205019	TTAATGCGATGACACTATTCATAGACTTTGATTTTATTTATAAGCCACTTGCTGCGTGAC
A_24_P48723	0.3548	0.0108288	-2.82	-2.6632	-0.937	A_24_P48723	NM_000961	TTGTTATGCCTTGCTATTTTAATAAAGATTCTATTTTCGTATAACATTGTCAAGTGGAAA
A_23_P213754	0.3555	0.0108665	-2.82	-2.6662	-0.211	A_23_P213754	NM_001033112	CAAGTATGTCATATTACTGAGGCTACAAGTTAGTCAGCAGATGAGTGCCAGTCCAGCCTT
A_24_P456723	0.3555	0.0108737	2.82	-2.6667	5.10e-01	A_24_P456723	NR_038386	AATGGACCAAGAAAAACTGCTTTACCATAGGACACTTGTGGCAATATGGCACCGATGGCT
A_24_P316430	0.3557	0.0108933	-2.82	-2.6682	-0.384	A_24_P316430	NM_002526	CAAATCCAGGGACAAATTTAGTGTTTGAAGATGAAATCACTGCATTACAACCTGAAGTAG
A_23_P29163	0.3561	0.0109421	-2.82	-2.672	-0.61	A_23_P29163	NR_003081	ACATTGGATTCAATGGTCAAGGAGAATATTTCTGAGTTGCTGAAGAAGAGCAGGTGACCC
A_24_P287826	0.3561	0.0109441	2.82	-2.6721	2.22e-01	A_24_P287826	NM_018124	TGATTCCACTAATAGTAGGAAGCAAGAGACTTAACTATGAGGGACGTTATGTGAATCTTA
A_24_P186342	0.3561	0.0109488	2.82	-2.6725	2.87e-01	A_24_P186342	NM_020917	CAAAGTTCTGTTCAGTGACAAATTAATGCCCTGTAATGTGGTAAGGAAATCTTATTTGTG
A_23_P82379	0.3561	0.0109704	2.81	-2.6741	4.67e-01	A_23_P82379	NM_000722	GCTGCATCATCTATGTGTAACATCAAAGCAAAATCCTATACGTGTCCTCTATTGGAAAAT
A_23_P321320	0.3561	0.0110008	2.81	-2.6764	2.44e-01	A_23_P321320	NM_052902	GGGACAGGCCACCTGGTCAGGAGGAATATTTTTCCTGCACTTTTTCTCAGGTATCAATAA
A_33_P3409513	0.3561	0.0110422	2.81	-2.6796	9.23e-01	A_33_P3409513	NM_002751	TCTGTGGGTCAGTCCTCTTTCCTTGTCCCAGGATGGAGCTGATCCAGTAACCTCGGAGAC
A_33_P3334121	0.3561	0.0110523	2.81	-2.6804	4.14e-01	A_33_P3334121		CTGCAGACAAATAACATCTAGTCTGTTGGTCTAAATGTCTGAGACTAGTGAACTTTTATT
A_23_P98015	0.3561	0.011056	-2.81	-2.6806	-0.357	A_23_P98015	NM_015960	TTGCCAAGCTTTATGGTGCTGATGGTTTGGTTTTTGGGGCATTGACTGAAGATGGACACA
A_33_P3884179	0.3561	0.0110604	2.81	-2.681	4.26e-01	A_33_P3884179	NR_040097	CACAATATTTTAACTATGTCCTTTAAAAAGTTTCTCCACAGACACTACCCAAAGCAGTCC
A_33_P3410019	0.3561	0.0110629	-2.81	-2.6812	-0.895	A_33_P3410019		TTGACTGAGGGTGAGCCACTCCATCCTCGTCTGATTGTGGGGTCTTGACCTCAAGGGGTT
A_33_P3245650	0.3561	0.0110782	-2.81	-2.6823	-0.351	A_33_P3245650	NR_038388	ACATCGCTAATGAGGACACCATACAAGGCATCGGTAATGAGGACGTTGTATATGACATCG
A_23_P208866	0.3561	0.011082	2.81	-2.6826	3.80e-01	A_23_P208866	NM_004877	CTCCAAGAAAAGTTGTCTTTCTTTCGTTGATCTCTGGGCTGGGGACTGAATTCCTGATGT
A_33_P3544880	0.3561	0.0110854	2.81	-2.6829	4.04e-01	A_33_P3544880	BC008131	ATTAAGTGACTTATCCAAGACCACAGGGCTTGCAAATGGCAAGTGGGAGGATTGTTTGAG
A_23_P258310	0.3561	0.0110964	-2.81	-2.6837	-0.812	A_23_P258310	NM_144651	GAAGCGCTAATAAAAGTTTTGTGCTGTTGAGCCCCAAATGGGAAATTTCTCAGGAAGAGA
A_23_P164196	0.3561	0.0111039	-2.81	-2.6843	-0.377	A_23_P164196	NM_138281	TACCTACTTACCATACTGGGAGGTAGAAGAGATGCAGAGAAATGTGGAATTTGTGGACCT
A_33_P3343120	0.3561	0.0111045	2.81	-2.6843	5.82e-01	A_33_P3343120	NM_002163	GCTGAAGTGTTCATAAGATAACAATAGGCTTGAATCTCCAATTCAAATGAATGTCAAAGC
A_33_P3423420	0.3573	0.0111717	-2.81	-2.6894	-0.95	A_33_P3423420	NM_024702	CCTCACTTTCCATTCCCCAAAATGATGTGTATGTTGCTAATTTTCCAATAAACTCATATG
A_23_P431319	0.3573	0.0111893	-2.81	-2.6907	-0.277	A_23_P431319	NM_173834	AGGACCTGTAAACTTCATGGTTCGGCTTTTTGTGGTGATTGTGATGTTTGCCTGGTCTAT
A_33_P3349597	0.3573	0.0112084	-2.81	-2.6921	-0.553	A_33_P3349597		ATCCATCCACCGATCCATCCGTCCACCCACCCATCCATCCATCCATCCATCCACCGATCC
A_23_P98910	0.3573	0.0112204	2.8	-2.693	2.79e-01	A_23_P98910	NM_006152	AGGTTCTCAGAATGACCGTAAGATAGCTTACATTTCCTCTTTTTGCCTTTATCTCCCCAA
A_23_P376627	0.3573	0.0112211	2.8	-2.6931	8.52e-01	A_23_P376627	NM_152783	ATCAGGGCAAGCTGTGCTCTGAGTTTCGGGTTCTGCTCCTACAAAGAACGTGCGGTGCTG
A_23_P301340	0.3573	0.0112231	2.8	-2.6932	3.08e-01	A_23_P301340	NM_144679	CCTCTGGTCCATCTCAGAAAAACCTTCCAAGAGCGCTGGGGTTTATGCTTTCTGAATAAA
A_24_P181254	0.3573	0.0112365	-2.8	-2.6942	-0.438	A_24_P181254	NM_006418	TTTTTCCTTTGATGTTCAAGTCCTAGTCTATAGGATTGGCAGTTTAAATGCTTTACTCCC
A_24_P229536	0.3573	0.0112484	-2.8	-2.6951	-0.251	A_24_P229536	NR_027791	ATATGAAAAGTGAAGAAAGTGATCATAGGAGAAAACCATTTCAGATGACAAGAGCACCTC
A_33_P3260307	0.3573	0.0112685	2.8	-2.6966	5.97e-01	A_33_P3260307	NM_001042476	AATCCAGATCTTGCCTCCCATCAGCCATCTTTCTCCCAATAAATTTTTGTTTTGTGCAAG
A_24_P148796	0.3573	0.0112686	2.8	-2.6966	4.68e-01	A_24_P148796	NM_020998	GGCCCACTTGCCTGCTTTACCCACAACTGCTGGGTCCTGGAAGGAATTATAATCCCCAAC
A_24_P79855	0.3585	0.0113282	2.8	-2.701	4.20e-01	A_24_P79855	BC104430	AAACCATTGGTCCCTTTTACCCAGGGAAGGACTCAAGAAGCCGAACGTGATAGGAGATGG
A_23_P421032	0.3585	0.0113373	-2.8	-2.7017	-0.69	A_23_P421032	NM_174977	AACAGGTGCTCTGCTGCTAGAAACAGCAAACCATCTAGATTAAACTCCTAAAGCCAGTGC
A_32_P26401	0.3585	0.011351	-2.8	-2.7027	-0.332	A_32_P26401	NR_024102	AGGATCAAAATAGCCAAAGAAAAAGTAAGAATCCGTATACAGGAAACAAATATGTGATGA
A_33_P3362249	0.3585	0.0113687	2.8	-2.704	5.65e-01	A_33_P3362249	XR_132538	CTCCAGTCGGTGGATTCCTCTATGCCCAGCTTGGGCCTCCCGGCGGCCTCTGCTGGCCCA
A_23_P430902	0.3585	0.0113952	-2.8	-2.706	-0.176	A_23_P430902	NM_178832	TCCAGGGAAAAGGGTAGAATATTTAGGCCACTTCAGGCACTACCATGGAGTGAACTGAAT
A_24_P83787	0.3585	0.0113983	2.8	-2.7062	2.60e-01	A_24_P83787	NM_001012959	ATCCCTCAACTTGTCACTTAAAGAAATCACTACTAAGGTGTGTATGAGTGAGAAATTCTG
A_33_P3262789	0.3585	0.0114258	2.8	-2.7082	8.21e-01	A_33_P3262789	NM_138393	AGCACTACTGGTGCCTGAAACACCTGGCCTGCTAGGAGGCTCCAATAAAGCTAACCCGGA
A_23_P502336	0.3585	0.0114525	2.8	-2.7102	4.84e-01	A_23_P502336	NM_013447	CTTTGCTTGATATAGACTGCTAAGGTGAGATGGGGAATATCAGAGTCAGCTGCTGCTTGA
A_33_P3569555	0.3585	0.011486	2.79	-2.7126	2.81e-01	A_33_P3569555	NR_038223	AAGGAAACCTGTACTCCTCAAATACACCACTCAGGTGACCATTAAATCATTTACATTGTT
A_23_P206920	0.3585	0.0114932	-2.79	-2.7131	-0.967	A_23_P206920	NM_001040114	GCGAGGTGAACGCACTCAAGAGCAAGCTCAGGCGAGGAAACGAGACCTCTTTCGTTCCTT
A_33_P3356696	0.3585	0.0115035	-2.79	-2.7139	-0.331	A_33_P3356696	XM_001718943	AACGCATTGTGGGGGAAAGAATGGCAGTTCTCCGCTGTGTGGAGTCTCTCACCAGGCCTA
A_23_P319859	0.3585	0.0115178	-2.79	-2.7149	-0.424	A_23_P319859	NM_005244	GGGATGGGTTTGTCTTGTCTTCTTTTTAATTTATGGACTAGTCTCATTACTCCGGAATTA
A_23_P75609	0.3585	0.0115289	2.79	-2.7157	2.62e-01	A_23_P75609	NM_014956	CTGGGACACTTTGGGTATATTCATGGGCATTGTTTCCATCTGTCTTTTCTACCTGTGCCA
A_23_P431330	0.3585	0.0115453	2.79	-2.7169	4.60e-01	A_23_P431330	NM_175918	GCTGTTACCGTACATTCTACTCATGGTGGCTTTTTAATACGTTTTTATGTCAAGGATCCC
A_23_P131074	0.3585	0.0115622	-2.79	-2.7181	-0.281	A_23_P131074	NM_016585	TAAACACCCTCAGGCACCCTAACCCTGTGTATGTGATTATTCTGAGCTTTTTGGCCTGGA
A_24_P237757	0.3585	0.0115698	2.79	-2.7187	4.50e-01	A_24_P237757	AL136621	TGAGGTAAGCAGGAATGTAAATGGAGTTCAAGGCCTTAACATTTTTGAGCACTGCTACTA
A_23_P254353	0.3585	0.0115747	2.79	-2.719	3.81e-01	A_23_P254353	NM_006647	ATGGCTGGAGGGCCACTGTGACGGCCGCATCGGCATCTTCCCCAAGTGCTTCGTGGTCCC
A_24_P260101	0.3585	0.0115748	2.79	-2.719	6.24e-01	A_24_P260101	NM_007289	GACATATCTCTAATTCCATCCATAAATCCAGTTCTACTATGGCTGAGTTCTGGTCAAAGA
A_23_P122924	0.3585	0.011585	-2.79	-2.7198	-0.501	A_23_P122924	NM_002192	AAACATCATCAAAAAGGACATTCAGAACATGATCGTGGAGGAGTGTGGGTGCTCATAGAG
A_33_P3316273	0.3585	0.0115946	2.79	-2.7205	1.33	A_33_P3316273	NM_002983	TGCTTTTGTTCAGGGCTGTGATCGGCCTGGGGAAATAATAAAGATGCTCTTTTAAAAGGT
A_32_P122226	0.3585	0.0116092	2.79	-2.7215	2.13e-01	A_32_P122226	NM_152435	TGATGAAGAGTGTCCTTCCGTTTCTAAGGTCTTCTCAATCTCAGCAATAGAGCTTCCCAG
A_23_P45185	0.3585	0.0116198	-2.79	-2.7223	-0.682	A_23_P45185	NM_004469	ATTCGTATGATCAGTACTGACTTTCTGATTACTGTCCAGCTTATAGTCTTCCAGTTTAAT
A_24_P915692	0.3585	0.0116277	2.79	-2.7229	2.79e-01	A_24_P915692	NM_007350	TACAGGATCTAAAAGGGTTTTCTTAGAAAGGGCAATATTGTCCAATGAAGTAAGCAGAAG
A_33_P3537875	0.3585	0.0116301	-2.79	-2.723	-0.313	A_33_P3537875	BC004943	TAAAAATACAAAATTAACTGGGCGTGGTGGCACATACCTGTAATGCCAGCTACTTGGGAA
A_24_P787889	0.3585	0.0116512	2.79	-2.7246	3.86e-01	A_24_P787889	NM_001242313	TCTGGACGGTGCTGTTGGACCCCGGCGCCGTCTCCGCGTGGCTCTGGAGCCTCACCTCGG
A_33_P3391796	0.3585	0.0116664	-2.79	-2.7256	-0.382	A_33_P3391796	NM_005450	GCACTGTTTAACTGTGTAGGAATGTATATGTGTGTGTATATACGGTCCCAGTTTTAATTT
A_33_P3367301	0.3585	0.0116798	2.79	-2.7266	5.83e-01	A_33_P3367301	NM_152219	CCGATGGAAATAGCATATGAGCCATGTATGTAGTTTCAAGTTTTTCATTAGCCACATTAA
A_33_P3365596	0.3585	0.0116947	2.79	-2.7277	1.87e-01	A_33_P3365596	NM_022080	TCTGGGGCAGGGGATTACGTTATGAAAACTAACCATGTGTAACAATAAATCTACCTTAGC
A_33_P3449815	0.3585	0.0117057	-2.79	-2.7285	-0.296	A_33_P3449815	BC007749	GAATTCCTACATTAGGCCAGCCACATAGTCAGCACTGATTGCTAAAAGAATAACTGAATA
A_33_P3346292	0.3585	0.0117223	2.78	-2.7296	1.47e-01	A_33_P3346292	AY358682	TAATCAGACTGCACCACAAGTGCAGCATACAGTATGCATTTTAAAGATGCTTGGGCCAGG
A_23_P156284	0.3585	0.0117267	-2.78	-2.73	-0.6	A_23_P156284	NM_080881	TTGGGAAAATATCACTTTGTATTCTCTGTCCAGGGCTTCAGATATTTTGCACGAATTTTA
A_33_P3364869	0.3585	0.011746	2.78	-2.7313	6.06e-01	A_33_P3364869	AK023341	GGAAGAAGGTGCCGTCTAGGACTTTCATAACTAGAGAGAAGACAACATCTGCTTTGAAAG
A_23_P21976	0.3585	0.0117648	2.78	-2.7327	4.18e-01	A_23_P21976	NM_001897	TGGGTTTATTTAAGGGAGATTGCAAGGAAGCTATTTAACATGGTGCTGAGCTAGCCAGGA
A_33_P3390236	0.3585	0.0117713	2.78	-2.7331	1.81e-01	A_33_P3390236	NR_034139	CCCTCCTGGGTGGACGTGGAGGCTTCAGAAAGATTCATTAAACTACTTTCCAAAGCTTAA
A_23_P87049	0.3585	0.0117868	-2.78	-2.7342	-0.426	A_23_P87049	NM_003105	ATGACGTCCCCATGGTGATAGCCTGAAAGAGCTTTCCTCACTAGAAACCAAATGGTGTAA
A_33_P3222380	0.3585	0.0117879	-2.78	-2.7343	-0.521	A_33_P3222380	NM_138420	AAAGGGCACCTGCCCAAGGTGGAGATGCCCAGTTTCAAGATGCCCAAAGTGGACCTCAAG
A_23_P68547	0.3585	0.0117922	2.78	-2.7346	1.90e-01	A_23_P68547	NM_182802	TGGGTTTATTGCAGATTAAAGCCATCTCAGTGAAGATATGCGTGCACGCACAGACAGACA
A_23_P127911	0.3585	0.0118052	-2.78	-2.7355	-1.17	A_23_P127911	NM_015430	ATGCTCATGCACTCCTTGAGAAGTGTTTCTGTATATCCGTCTGTACGTGTGTCATTGCGT
A_33_P3353051	0.3585	0.0118109	-2.78	-2.736	-0.293	A_33_P3353051	NM_001040438	TGGAGTTTCTGGTGTCTTTGCTTGGAACTGACCTAGCTCGTGGCAGGGGGAACTCGGCTA
A_33_P3342992	0.3585	0.0118411	2.78	-2.7381	2.97e-01	A_33_P3342992	NR_004847	CTTAGTATACCACCTAGAATCGAGACAAATACATGAAGTTATGAATCATGCCATTTTCAG
A_23_P94932	0.3585	0.0118556	-2.78	-2.7391	-0.206	A_23_P94932	NM_015702	TCTGTTGATGACCTTGGATGCTGTAAAGTGATTCGTCATAGTCTCTGGGGTACCCATGTA
A_33_P3319593	0.3585	0.0118564	-2.78	-2.7392	-0.202	A_33_P3319593	NM_024735	TGGCCTCTTCAAAGGTACCTATGGCAGCCACGGCCTGGAGATTGTGATGCTCAGCTTCCA
A_33_P3280074	0.3585	0.0118616	-2.78	-2.7395	-0.242	A_33_P3280074	NM_014619	GCCCGCAGCGAGGAGAGCCTGGAGTGGGAGAAAACCACCAACAGCAGCGAGCCCGAGTAG
A_24_P45005	0.3585	0.0118627	2.78	-2.7396	2.75e-01	A_24_P45005	NM_024663	ACGGGGATCTTTTACCTCACTTTGCACTGATTAATTTTAAGCAATTGAAAGATTGCCCTT
A_23_P61707	0.3585	0.0119085	-2.78	-2.7428	-0.434	A_23_P61707	NM_021828	CTAAATGTCATAGCGTGATCTTAGCCTAGGTAGGCCACATCCATCCCAAAGGAAAATGTA
A_23_P65930	0.3585	0.011912	2.78	-2.7431	2.46e-01	A_23_P65930	NM_001077268	GCCCTCCTATTAGAAGCCCAGACTGGAAGTGAGAGGCATGATGGGGAGAGACCAGACTGA
A_33_P3383326	0.3585	0.0119133	-2.78	-2.7432	-0.516	A_33_P3383326	NM_057159	CCACACCTGCAATGTAAAATGGAAGAAAATGCAAAGAAACCAAATGTGCCGAGTGAATAA
A_24_P383762	0.3585	0.0119177	-2.78	-2.7435	-0.176	A_24_P383762	NM_175062	ATGTGCCACTTTGGCCACCACCCACAGTCTGTCACCACGTGGCTTGGGAACTTCTGGAGC
A_23_P18447	0.3585	0.0119476	-2.78	-2.7456	-0.447	A_23_P18447	NM_013261	AATCACTGTAGTCTAAGACCTGATCTATAGATGACCTAGAATAGCCATGTACTATAATGT
A_33_P3317073	0.3585	0.0119499	-2.78	-2.7457	-0.255	A_33_P3317073	NM_001244766	AGAAGAGAACTTGCACCACTCCAAGAACTGATTGAAAAACTCACCTCAAAAGACAGATAA
A_23_P48713	0.3585	0.0119563	-2.78	-2.7462	-0.735	A_23_P48713	NM_152444	ACATGGGAGCTGCATTCCAGTCCATGATGACAGGAGGTAACATTGGAAAGCAGATAGTTT
A_23_P81934	0.3585	0.0119577	-2.78	-2.7463	-0.452	A_23_P81934	NM_025260	CTCCACTTGTGAAAACCGAGCCCCAGAGGCCAGTAAAGGAGGAAGAGCCCAAGATTCCAG
A_23_P103971	0.3595	0.0120193	-2.77	-2.7506	-0.285	A_23_P103971	NM_178134	AGTTTGATCAAAACTCCACTCAGTATCTGCATTACTTTTATCTCTGCAAATATCTGCATG
A_33_P3269924	0.3595	0.0120197	2.77	-2.7506	5.33e-01	A_33_P3269924	AK090537	AGAGGGGAGAGTGTCATTGTGTGCCTTTTGACACATACATTAAGACCAAAAAGGAAAAAA
A_24_P181422	0.3595	0.0120301	2.77	-2.7513	2.51e-01	A_24_P181422	NM_172097	CTCTCAAACTCCTTGCACAATTCCGTCAAATTCAAATTATTATTTTGGTCCTGGTCAGGG
A_24_P364954	0.3597	0.0120513	-2.77	-2.7528	-0.223	A_24_P364954	NM_024648	GCACTTTGTGAACCTGTACAGATACTTCGGGGATAAAATACAGAACATCTTCTCAGAGGA
A_24_P303524	0.36	0.0120781	2.77	-2.7547	5.88e-01	A_24_P303524	NM_182924	CCTACAAGGGGCATGTGGACAGCAGGGACCTGCGCTACCGTCTGTGGTCTCAATAAAGAA
A_33_P3329898	0.36	0.0121228	2.77	-2.7578	4.27e-01	A_33_P3329898	CR627426	TTCATTATAGCTAGGATTCTTCCTTCTCGCAAGCTATTTTGGAGGAGTGTCAGGGACCTC
A_33_P3309551	0.36	0.0121257	-2.77	-2.758	-0.385	A_33_P3309551	NM_002839	CGAAAGAAGTCTGTATGAAAATCAGTTCTTTGCTGACACAAGTTCCATTTGTTACAAATG
A_23_P213863	0.36	0.0121329	2.77	-2.7585	3.61e-01	A_23_P213863	NM_001190946	ATTCTGCAAAGCAGACTCGTCAGAAAGTTGCTGTGAACTGGACCAACTTCAGCCTCAAGA
A_33_P3576797	0.36	0.0121342	2.77	-2.7586	5.61e-01	A_33_P3576797	AL110203	CTTTTTATGAATGCCTTAGTAGTACTTTGGCTTCTTGAAGAGGAGCTAATGCCATAACCC
A_23_P79221	0.36	0.0121344	-2.77	-2.7586	-0.401	A_23_P79221	NM_001105	AAATGTAATGTCAGACTTTGCTGCATTTTACACATGTGCTGATGTTTACAATGATGCCGA
A_23_P391607	0.3601	0.0121531	2.77	-2.7599	2.12e-01	A_23_P391607	NM_152285	AGTGCCCACTACCAGCACCTTGATTCTTCCTCCAGAGTACAGTTCTTGGGGCTACCCCTA
A_33_P3405897	0.3603	0.0121713	2.77	-2.7611	4.65e-01	A_33_P3405897	NM_014798	TGTCCTATGACTCAGACCTGGGCACAGCAAATGCTGAGGACTCAGACCAGTCTCTGCAAG
A_33_P3360728	0.3603	0.0122002	-2.77	-2.7631	-0.238	A_33_P3360728	NM_000713	ACATGAGGAGCAAAGGAAGGGGGCAATAAATGTTGAGCCAAGAGCTTCAAATTACTCTAG
A_23_P340188	0.3603	0.0122075	2.77	-2.7636	2.10e-01	A_23_P340188	NM_138819	CAGAACCATGTTGAAGATACAAGCGTAAATTGTTAGGCTGCTATTTTCTAGAAAATGCTG
A_23_P366453	0.3603	0.0122149	-2.77	-2.7641	-0.456	A_23_P366453	NM_152688	TTTTAATGCTGTTTTAATGGGGTTGAAAACAAGCAGCTACTGTATGTATGTAGCTAACTG
A_33_P3282978	0.3603	0.0122328	-2.76	-2.7653	-0.206	A_33_P3282978		CTTGCCTGGAGAGACAACAGTTTAGGGGCTCTGCTGGTTCAAGAAGGACTGTGCAGGTAG
A_23_P132874	0.3603	0.0122344	-2.76	-2.7654	-0.306	A_23_P132874	NM_032359	TGTGTCAACAGATGGATCACTGGAATGTGGGGATTCTGAAACAGAAATGAAACTGTCCTT
A_33_P3367717	0.3616	0.0123017	-2.76	-2.77	-0.168	A_33_P3367717	NM_001105662	TATGTCAAAGTTCAAGAAGGCCAGTGGTATAAAATGGATGATGCCGAGGTCACTGCCTCT
A_33_P3305105	0.3616	0.0123113	-2.76	-2.7707	-0.236	A_33_P3305105	NM_198315	CCTGCCCTACACACTCAGCATGGTCGCCACCATAGATTCCCAGCATGGCATTGAGAAGGT
A_33_P3803639	0.3616	0.0123175	2.76	-2.7711	3.71e-01	A_33_P3803639	NM_021138	GGTAAAGTGTGAGAGCTTGCCATCCAGCTCACGAAGACAGAGTTATTAAACCATTCAAAT
A_23_P209449	0.3618	0.0123361	-2.76	-2.7724	-0.285	A_23_P209449	NM_003507	TTTTAAAACTCCAACACAGGTTTTGGCATCTTTTGTGCTGTATCTTTTAAGTGCATGTGA
A_33_P3271395	0.3619	0.0123558	2.76	-2.7737	2.28e-01	A_33_P3271395	NR_024489	AAACAAACCCTCCAGAAACCTGCCTTTCACTGGTACAAATAAATCGACAAAGAGGGCAAA
A_24_P103893	0.3619	0.0123672	-2.76	-2.7745	-0.259	A_24_P103893	NM_021828	CGTGGGTCCATTACACTTTTTATCATCAACTTGCATCGATCAAGAAAGAAAATCAAGCTG
A_33_P3276282	0.3619	0.0123909	2.76	-2.7761	7.61e-01	A_33_P3276282	BC048416	CGACTTCTTGGTGTATGTGCATGTGTGTGTGCACACACGGGCACACTTATCTGTGTGTAA
A_24_P356	0.3619	0.0123916	2.76	-2.7761	1.92e-01	A_24_P356	AB028971	GCGGCTTATGTTCTGAATTTGTTTATGAGAACTGATCATTAGTGAGACTGGCCACAGTAT
A_32_P524614	0.3627	0.0124285	-2.76	-2.7786	-0.986	A_32_P524614	NM_175734	CTGACCAGCAGGCGGATGTGGGGTGTGGGGCAGGGCATGGAGGGAGAGGAATAAAGAGAA
A_24_P275873	0.3627	0.012474	2.76	-2.7817	3.19e-01	A_24_P275873	NM_005993	TGACTTGGGGTGGACGCCTCTGCCTTCACTTGAACACAAATGTGCTTCCTATAAAATCAT
A_33_P3228322	0.3627	0.0124797	2.76	-2.782	2.25e-01	A_33_P3228322	NM_173042	TTGACCAGAGCTTGGGTCCTACCTGTCTACCTGGAGTGAACAGTCCCTGACTGCCTGTAG
A_24_P374586	0.3627	0.0124832	2.76	-2.7823	2.32e-01	A_24_P374586	NM_000535	TCTGAAACATCACACATGTAAGATTCAAGAGTTTGCCGACCTAACTGAAGTTGAAACTTT
A_23_P3911	0.3627	0.0125492	-2.75	-2.7867	-0.857	A_23_P3911	NM_020405	CCCGCATAATTTTAAGACGGTTCTTTAGGACATTAGTCCACCATCTTCTTGGTTTGCTGG
A_33_P3363355	0.3627	0.0125689	2.75	-2.788	2.12e-01	A_33_P3363355	NM_022377	AATAAAAATAAATATTGGCGGGGGAACCCTCTGGAATCAATAAAGGCTTCCTTAACCAGC
A_33_P3265956	0.3627	0.0125824	2.75	-2.7889	3.25e-01	A_33_P3265956	JF432662	TAGAGAATTTATGGGTCGACTGTTCCAGAAGCCTCAGGAGTACAGTTCTGCCTTTTCCTT
A_23_P143650	0.3627	0.012585	2.75	-2.7891	2.03e-01	A_23_P143650	NM_152511	GGTCAGTTCCCCAGTGGGAATGATCCCTGACATCTATGAGAAGGAAGTCCGTTTGATGAT
A_24_P940086	0.3627	0.0125903	-2.75	-2.7894	-0.467	A_24_P940086	NM_007225	GGGTGACCAGGTGCTGGGATCATCGAGTGAGTATGTGCAGGAGGGATTGTAGAGACACAA
A_24_P561341	0.3627	0.0125918	-2.75	-2.7895	-0.224	A_24_P561341	NM_001002919	GTTGACAGTTTGCAGATATATATTCGATAAATCAGTGTACTTGACAGTGTTATCTGTCAC
A_24_P590560	0.3627	0.0126118	2.75	-2.7908	3.98e-01	A_24_P590560	NM_018427	TTGGAAGCTTTTTGGCAAGAGCTAAATTTATTCCTCTTATTACTGTAAAACCATGCCTAG
A_23_P142070	0.3627	0.0126219	-2.75	-2.7915	-0.902	A_23_P142070	NM_012466	CCTGAGGAAGAATTACAGAGGTTACAACGAGCCAGACGACTATTCTACACAGTGGAACTT
A_23_P40866	0.3627	0.0126287	-2.75	-2.792	-0.318	A_23_P40866	NM_015642	TTTTTACTTTCTGTTTTTGTTTTTGTTTCGTTTCATTTTGTACTACATGAAGAACTGTTT
A_23_P213678	0.3627	0.0126372	-2.75	-2.7925	-0.3	A_23_P213678	NM_000919	TCATTGCCAGTGTCTTTCTTTGGTGCCTTTCCTGTTCAGCATTCTTAGCCTGTGGCAATA
A_23_P97442	0.3627	0.0126378	-2.75	-2.7926	-0.181	A_23_P97442	NM_032125	CCTGCAGTTTGAGGCCAGAGAGGTGAGTGGACCTGACAAGTGCCAGAGTAACCGTGTAGA
A_23_P257111	0.3627	0.0126605	2.75	-2.7941	6.04e-01	A_23_P257111	NM_000507	TAATGCCACTGGTGTTAAGATATATTTTGAGTGGATGGAGGAGAAATAAACTTATTCCTC
A_23_P21734	0.3627	0.0126619	-2.75	-2.7942	-0.287	A_23_P21734	NM_001015891	CATGGTTGTGATTTCTTCCCTGAACGCTGGTTTCATATAGTTTTTGTGCTGAGAACAGAT
A_23_P122906	0.3627	0.0126631	-2.75	-2.7942	-0.415	A_23_P122906	NM_015570	AGTTCCATTTGGTCTTCTAGTATATTAAAGTGCTATCTGACGTTGTTATCCTGTTTTTGC
A_33_P3220738	0.3627	0.0126709	-2.75	-2.7947	-0.193	A_33_P3220738	NM_207108	TATAACCAGCACTATGAGAGTTTTGGGGAATTCACCTGGCGATGTGAGGATGAGTTAGGT
A_23_P355289	0.3627	0.012673	2.75	-2.7949	3.89e-01	A_23_P355289	NR_003226	TCAACAGGGATGACTCAGCAGACTCAGCAGGGATGACTCAGCACTGCCCCTCAACAGACA
A_33_P3405424	0.3629	0.0126902	2.75	-2.796	8.76e-01	A_33_P3405424	NM_172374	AAGGCCAGTTATCTCTCCAAAACACGACCCACACGAGGACCTCGCATTAAAGTATTTTCG
A_23_P79094	0.3631	0.0127201	2.75	-2.798	3.03e-01	A_23_P79094	NM_006865	CTGTGTCAGTCACAGGGAGGGATGCACACTTTCCTTTTGACCAAGGAGGGGGCAGCTGAT
A_33_P3324065	0.3631	0.0127251	2.75	-2.7983	2.72e-01	A_33_P3324065	NM_001080542	AGGCCTGATGACAGCTCTTCCGTGGACAGGGTGCAAGTGCATCCTTTCCAAATGTGCCAG
A_32_P128701	0.3633	0.0127423	-2.75	-2.7994	-0.329	A_32_P128701	NM_019050	GTCCAGTTTTGCCTCTTTTAAGTACTGTCCAGTTGAAACCTCCTGACTCATGTACTACTA
A_23_P167017	0.3643	0.0127994	2.74	-2.8032	3.00e-01	A_23_P167017	NM_022135	GGCAAGTTACATAGCCTCTGTGAGCCTCATCGGTAAACAGTGGGGGTTATGAAACCCACC
A_23_P35782	0.3643	0.0128053	2.74	-2.8036	1.78e-01	A_23_P35782	NM_024771	GAAAGGACACAGATGCTAAATATTTATTGTCTTAGATCATGGATTCCTGATACCTCTCAC
A_24_P515319	0.3664	0.0128962	-2.74	-2.8095	-0.193	A_24_P515319	NM_001136572	TGCCTCATTGAATTCTGGTGAGGGACGTTGTAGTTGGCGTGGTTCTCCGGAAACGCGCCA
A_33_P3275801	0.3664	0.012903	-2.74	-2.8099	-0.628	A_33_P3275801	NM_001927	CTCCCCTCCCCTGCTGCAGGGGCTCTGGAGAGAAACAATAAAGAGATTCACACACAAGCC
A_33_P3364493	0.368	0.0129738	-2.74	-2.8145	-0.833	A_33_P3364493		AACCCACCCTGACACACACACGGATACACACGGGTGCACGCGGGCAGACACACACACACA
A_24_P816384	0.3681	0.0130029	2.74	-2.8164	3.83e-01	A_24_P816384	NR_003661	GTGGACTCTGCAGATTATATAACCTTCCTAAGCACCCGAATGTTGAGATGCCAGATCAAC
A_23_P95823	0.3681	0.0130029	-2.74	-2.8164	-0.207	A_23_P95823	NM_145080	TTTGTTTAGAAAGGCTCTGGAACTGATTATTGACTCAGAAACCGGCTTTGCGTCTTCCAC
A_23_P209519	0.3682	0.0130222	-2.74	-2.8176	-0.392	A_23_P209519	NM_001039550	TGGGCAGCTGAAGTCAGTCACAATCAATGGTGTCCCAGATGACCTGGCACTGGGCTTGGA
A_33_P3325120	0.3682	0.0130314	2.74	-2.8182	2.95e-01	A_33_P3325120	BC040649	TGTTCCAGCATCAGTTCAAAAGTTTCAAGTCCAGAGCCTCATCTAATCTCACCTAGGCCA
A_33_P3335590	0.3682	0.0130441	-2.74	-2.819	-0.785	A_33_P3335590	NM_001103175	GCAGGAGCTCCAGGTGGGTGGCAGGGGCAGGTGAACAGAGCTATTTTCCGAATTAATATA
A_33_P3365864	0.3687	0.0130862	2.73	-2.8217	4.06e-01	A_33_P3365864	NM_001143888	AAAGACTTTGACTTGGACATGACTGAAGAGGAGGTGCAGATGGCACTTTCCAAAGTGGAT
A_23_P101642	0.3687	0.013094	-2.73	-2.8222	-0.278	A_23_P101642	NM_002842	TCTGAGGCAGGAAGGAATTTGGGTCTGGAGTTCTGGCTACTTGAGGACCAAAGGCAGGAA
A_23_P149992	0.3687	0.0131118	-2.73	-2.8233	-0.34	A_23_P149992	NM_020992	CAAGCAGCCTTGTCATCGACAAAGAATCTGAAGTTTACAAGATGCTTCAGGAGAAACAGG
A_23_P210675	0.3687	0.0131225	2.73	-2.824	1.86e-01	A_23_P210675	NM_014258	CTTCATTGGCTAAAAGTGTCTTCTGTAATACTGATAGTGAAGAAACTGTTTTTACATCCG
A_24_P287075	0.3687	0.0131421	2.73	-2.8253	2.46e-01	A_24_P287075	NM_004579	GAAACAAGGATCTTCCGAGTGCTTGGGGCCCACAGAGACATCATCCTGGAGAGCATTCCC
A_33_P3243168	0.3687	0.013172	2.73	-2.8272	3.15e-01	A_33_P3243168	NM_198055	CCCAGGGCTTGGCTACTGTAGGTGTCCAATAAACAGTAGATGGAAACTGGGTCTCCACCC
A_24_P118011	0.3687	0.0131805	2.73	-2.8277	2.15e-01	A_24_P118011	NR_027258	GAGCCCTGAAGACTTTCTCACATTTGTGAAGATGACAGGACATGATCCCATAATACTAAA
A_23_P1029	0.3687	0.0131817	-2.73	-2.8278	-0.5	A_23_P1029	NM_017459	CCGCCTCTACTCCATACACAGGCCTTGCAAACAGTGTCTCAACGAGGTCTGCTTCTACAG
A_33_P3421611	0.3687	0.0131899	2.73	-2.8283	3.14e-01	A_33_P3421611		AGAGTCAATATTTTAGACTTTGCAAGCCTATACCTCCTCACCTCGGCTGAAAGCAGCCAT
A_33_P3322730	0.3687	0.0132071	-2.73	-2.8294	-0.483	A_33_P3322730		CATTGAATCGATTGGAATGGAATGAAATGGAATGGAAAGGAATCATTCCGAGTGGAATGG
A_23_P156708	0.3687	0.0132218	-2.73	-2.8303	-0.559	A_23_P156708	NM_032470	CTTCTCTGCCAGCGATCTCGCAGCACTGTGTTTACAGGGGGGAGGGGAGGGGTTCGTACA
A_33_P3302736	0.3687	0.0132255	2.73	-2.8306	2.21e-01	A_33_P3302736	NM_001166012	GAATGTAGAAAAACATTTAGGCATAGGTCAGGCCTTATGCAGCATCAGAGAACACACACC
A_33_P3315836	0.3687	0.0132314	-2.73	-2.8309	-0.29	A_33_P3315836		ACGTCCATACATACATCTATCCATACATACCTACATACATACATCTATCCATCCATCCAT
A_23_P94795	0.3695	0.0132717	2.73	-2.8335	3.49e-01	A_23_P94795	NM_003213	TGAACAGCGTGCTGGAGAACTTCACCATCCTGCAGGTGGTCACCAACAGAGACACACAGG
A_23_P417918	0.3702	0.0133124	-2.73	-2.836	-0.294	A_23_P417918	NM_006211	TTTGCTAGCCAAAAGGTATGGGGGCTTCATGAAAAGGTATGGAGGCTTCATGAAGAAAAT
A_32_P129527	0.3702	0.0133296	2.73	-2.8371	2.14e-01	A_32_P129527	NM_018341	GGCTTACACCAGTTACGAAAAGAACAAGTGGAATGAAACTATCAATCTTACACATACAGC
A_33_P3258349	0.3702	0.0133361	-2.73	-2.8375	-0.362	A_33_P3258349	NR_003935	GACTTACAGATCGTGAACTTTGAATCTACATACATTAACGATGATTCCATTTGGTCCTCC
A_33_P3356631	0.3713	0.0133882	2.72	-2.8408	1.51e-01	A_33_P3356631	NM_006298	TCCCCCATTTTATAAATGAGGAAACGGAGGCTTAGTTGAGTGAGCTGACCAATATCACCC
A_23_P43164	0.3713	0.0134214	-2.72	-2.8428	-0.691	A_23_P43164	NM_015170	TGTTGCATGTGTTTTACCTCGACTTGCTAAAATCGATTAGCAGAAAGGCATGGCTAATAA
A_23_P339480	0.3713	0.0134361	-2.72	-2.8438	-0.178	A_23_P339480	NM_003642	AACATGAACAGCTGGAAGAGAGTTTTCAGGAACTAGTGGAAGATTACCGGCGTGTTATTG
A_23_P115316	0.3713	0.0134421	-2.72	-2.8441	-0.276	A_23_P115316	NM_022371	CTTATTATGACACTCCAGATGGTCTCCTTAGCATCTCAGCTCTTCTGCAAGGAAGAGCTT
A_23_P323924	0.3713	0.0134518	2.72	-2.8447	3.02e-01	A_23_P323924	NM_001002261	AGAGTTCAGTACCCCGTGCTTTCTTTACACTGGAGAGGAACTAAAAGGATCTCTGTGTCT
A_24_P63563	0.3713	0.0134624	2.72	-2.8454	2.01e-01	A_24_P63563	NM_014773	AGAGTTCTTGTCCATCAGTTCATACTGCAATTTTATGTGAAAGCATTATGACTGTCCTAC
A_23_P356646	0.3713	0.01347	-2.72	-2.8459	-0.578	A_23_P356646	NM_001190825	TCTCCAATAAACACTCCAATCTCCACACACACATCCCCCACAGGTGCTGAGAGGGGAGGG
A_23_P40880	0.3713	0.0134808	2.72	-2.8465	4.57e-01	A_23_P40880	NM_178868	GCTACGCTGGAAATACATATTTCAGTTTTATAGCATGGAGATCCAGGACCATACAGTGAT
A_33_P3280666	0.3715	0.0135005	-2.72	-2.8477	-0.357	A_33_P3280666	NM_138415	ACCAAGCCCTCAGTGGCAGCCACACACCCCACCGTCCAGCACCCCCAGGGCCACAACTGA
A_33_P3310961	0.3717	0.0135359	-2.72	-2.8499	-0.294	A_33_P3310961	NR_038943	GATCTGAGGCACCCCATGAGGCCTATGATTACTGTAAACCTCTAAAATAAATAAAAAATA
A_23_P137935	0.3717	0.0135533	2.72	-2.851	6.05e-01	A_23_P137935	NM_002432	CAAGCTGAAACTGGTGTGTGGAAGTCACAGCTTCATCAAGGTCATCAAGGCCAAGAAAAA
A_24_P283341	0.3717	0.0135659	2.72	-2.8518	3.89e-01	A_24_P283341	NM_022765	CCCAGAACAGCAAAAGAAACTATGGGTAGGACAGCTGCTACAGCTCGTTGACAAGAAAAA
A_23_P308097	0.3717	0.0135712	-2.72	-2.8521	-0.285	A_23_P308097	NM_001009552	ATCATGGAATTAGATGACACTTTAAAATATTCCTTCCTTCAATTTGACCCGGCGCCTCGT
A_24_P693321	0.3717	0.0135727	2.72	-2.8522	6.89e-01	A_24_P693321	NR_024456	ATCACAACTATGCCAAATAATCAATCCTACAATGTCCAAAATTTTACTTTAAAACTGGAA
A_23_P406025	0.3717	0.0135856	-2.72	-2.853	-0.787	A_23_P406025	NM_015225	TGCATTGGATTGCTCAGAATAAAGTGTCTGTTAGACTTCGTTTTGGTAAATAAATTCTCC
A_23_P71073	0.3717	0.0136246	-2.72	-2.8554	-0.409	A_23_P71073	NM_000474	GCTGGATAACTAAAAATAAAAATATATGCCAAAGATTTTCTTGGAAATTAGAAGAGCAAA
A_24_P42501	0.3717	0.0136359	-2.72	-2.8561	-0.245	A_24_P42501	NM_001037171	ATATGTGTAAGAAGAGCTTGAGCCCAGAACAGGACATTAAGTTCAGTGGCCATGTTAGCT
A_33_P3226955	0.3717	0.0136381	2.71	-2.8562	2.93e-01	A_33_P3226955		CACATCATTAGAACCCAGGCCATTAAGCTCATTGAAACTGAGTTTCTTTTCCTATAAAAT
A_23_P300033	0.3717	0.01364	-2.71	-2.8563	-0.589	A_23_P300033	NM_006206	CCTTAAAATGTGGTCTGCCAATCTGTACAAAATGGTCCTATTTTTGTGAAGAGGGACATA
A_33_P3379526	0.3724	0.0136768	-2.71	-2.8586	-0.423	A_33_P3379526	AK127601	ATATACATACGCACATACACACGTATATATACAGGCACACACATACCCACATGCCGTGTG
A_23_P7402	0.3737	0.0137498	-2.71	-2.863	-0.442	A_23_P7402	NM_178140	GTAGTTGCAAGAATATACCATGAAGATTAAAGTAGGCTGGGTTTCATTTCCATCTTCCCA
A_24_P88775	0.3737	0.0137612	2.71	-2.8637	2.27e-01	A_24_P88775	NM_032788	ATGAATGTGAGGAAAGTTCCTTTCCAACTTGAGATGTATAAAACTAGAGCTGAAAAGAAG
A_33_P3259938	0.3737	0.0137705	2.71	-2.8643	2.32e-01	A_33_P3259938	XR_113275	TGAGCCAGCGTGCCCAGTGGCTTTTCTGCTTTTTTCACTGATAAAAAATGTTTGATTTGC
A_23_P120194	0.3737	0.0137962	-2.71	-2.8658	-0.256	A_23_P120194	NM_016467	TGGGCAGGCCCAGCTTATAAGTTAAAGGGCATCACAGTGAGGGTGTAGTAGATAAATTCA
A_23_P420610	0.3737	0.0138073	2.71	-2.8665	2.46e-01	A_23_P420610	NM_138782	TTGCACCAGTATGGGATGTATTCAAAACATCTACAGAGAAATTAGCAAATTGTCACTTGG
A_33_P3262833	0.3737	0.0138388	2.71	-2.8684	2.35e-01	A_33_P3262833	NR_033350	TCAGCCAAGTATTGGTATTCTTCCTCATTCGGTATAAGGCAGCTTTCAATTTGCTTAGAA
A_23_P212002	0.3737	0.0138573	2.71	-2.8695	3.51e-01	A_23_P212002	NM_005385	TCAACTTGTGTGTTTACTGACAGAGTGAACTACAGAAATAGCTTTTCTTCCTAAAGGGGA
A_33_P3374957	0.3737	0.0138625	2.71	-2.8698	2.56e-01	A_33_P3374957	NM_031918	CCGCCCTGCCTGGCCTCATCCTTGTATTTAATTAATTAAACAAGCCCCTTTTTAAACCCT
A_33_P3267230	0.3737	0.0138668	2.71	-2.8701	4.84e-01	A_33_P3267230	NM_001040282	TTAACAACCCAAGCAAGCTTCGCGTCCTCGTTTTATTTTTGGTTAAACTTATGAATATGT
A_33_P3212764	0.3737	0.0138757	-2.71	-2.8706	-0.785	A_33_P3212764	AK097358	TTTTTCTAATACAGAGTACTTGGCTGTTCTCTAAGCTAAACCTGATCACCTACATTGAGT
A_33_P3334743	0.3737	0.0138858	2.71	-2.8712	4.48e-01	A_33_P3334743	NM_014247	AGGATGAAGATCATTAAGCATTTCATCAAGATAGCACTGCACTGTAGGGAATGCAAGAAT
A_32_P187571	0.3737	0.0138868	-2.71	-2.8713	-0.389	A_32_P187571	NM_004588	TGTGACTCGACTGCTGGGATGTATCTGCTTTTGGGAGCAGACTGAGTTTCTTTTGCAATT
A_33_P3504659	0.3737	0.0138945	2.71	-2.8718	2.88e-01	A_33_P3504659	NM_032977	CCTTGGGGCGTGGAAGGGCATTAGGAGTGTTTCATTTGATATGTGAATGCTCATAAAAAA
A_23_P167367	0.374	0.0139248	-2.71	-2.8736	-0.321	A_23_P167367	NM_153426	AATAGTTTCTCTGGTGGATGCAATGATGTTTCTGAAACTGCTATGTACAACCTACCCTGT
A_23_P216225	0.374	0.0139375	2.7	-2.8743	2.37e-01	A_23_P216225	NM_004430	GGTTGTGAATTTCCAGGTACTTGGACTTTTTGTAGAAGTAGAGAGAAGAAGATGAAGTTT
A_23_P502797	0.374	0.0139458	-2.7	-2.8748	-0.378	A_23_P502797	NM_020830	GTAACAGTTTACTGGTTGTTCCATTCCTGAATATGCAGGCTAATTTGTACAGATAGGGAT
A_23_P43107	0.374	0.0139597	2.7	-2.8757	6.45e-01	A_23_P43107	NM_030788	ATGTTCCAAACAAACCACATGATCTTGCCTGTGTCACAATGTAACAAGACTCTAGCTGGG
A_32_P208823	0.3753	0.0140195	-2.7	-2.8792	-0.307	A_32_P208823	NM_020405	GCCAATCTCTGTCTCCAAAAACCTACCTGAACTTAATGGTAGAATTCAAAGATCTGGGGA
A_23_P111860	0.3754	0.0140378	-2.7	-2.8803	-0.513	A_23_P111860	NM_018059	TAGGTTCTATTTATATGGCAGATGACGTGAAATTGTGATGTTTGTTACAGAGCTTTTATG
A_33_P3331831	0.3755	0.0140561	-2.7	-2.8814	-0.338	A_33_P3331831	XM_003403663	ATGGGGCGCTAACCACCTCCACGGGCATTTTAAATAAAACCCAAAGTTGTTTTGTTTTTT
A_23_P24796	0.3758	0.0140955	2.7	-2.8838	2.50e-01	A_23_P24796	NM_032127	GTCACCTCGCCTTTCTTGTTGGAGACTTCAGAGGAAGGATCTGGCCCTCTCATCTCAGGC
A_24_P37540	0.3758	0.0140971	2.7	-2.8839	4.29e-01	A_24_P37540	NM_001198793	CCAAGCTAGCAGAATGACACCTACCGGGCATAGGAACGTTAATGCCATGAGACAGGGGAA
A_23_P117852	0.3758	0.0141051	2.7	-2.8843	2.73e-01	A_23_P117852	NM_014736	TACTGCTGCCATTTTTATTGGTGTTTGATTATTGGAATGGTGCCATATTGTCACTCCTTC
A_33_P3362088	0.3758	0.0141191	2.7	-2.8852	3.54e-01	A_33_P3362088	NM_002560	TCCTCAGAGAAGCGCTGTGCTAAGGTGATCGAGGACCAGACATTAAAGCGTGATTTTCTT
A_33_P3394615	0.3766	0.0141687	-2.7	-2.8881	-0.215	A_33_P3394615	NM_023934	GACCTTCAGCAGAAAAGTATAGCGTGGCAACCCAGCTGTTCATTGGAGGTGTCACTGGAT
A_24_P70183	0.3766	0.0141747	-2.7	-2.8884	-0.974	A_24_P70183	NM_001040113	GACCTCTTTCGTTCCTTCTAGAAGGTCTGGAGGACGTAGAGTTATTGAAAATGCAGATGG
A_24_P334130	0.3784	0.0142568	-2.69	-2.8933	-0.354	A_24_P334130	NM_054034	AATACTCTTTCTGCACAGACCACACTGTTTTGGTTCAGACTCGAGGAGGAAATTCCAATG
A_33_P3223713	0.379	0.0143154	-2.69	-2.8967	-0.266	A_33_P3223713	NM_006357	AGAAGAAAAACACCAAACTCTCTAGCAAAACCACTGCTAAGTTATCCACTAGTGCTAAAA
A_33_P3238895	0.379	0.0143167	2.69	-2.8968	1.55e-01	A_33_P3238895	AF274942	TTAAAGTATTCCCCTTTTGGGGGTTGCTCTTTTAGTTGGAAAACTAAGCAACTGAGGTAA
A_24_P369898	0.379	0.0143407	2.69	-2.8982	3.16e-01	A_24_P369898	BC128044	GGAACCAGGGCTGGCTCGGTGGGACAGGGCCTCAGAGGTGAGGAAGATGGGAGAGGGACA
A_32_P235159	0.379	0.014353	2.69	-2.8989	1.98e-01	A_32_P235159	NR_024322	TTCATGGAAGTGTACATAGGTTAGGCCATTTCAGCAGACATTGCAGTTAGTCAGCAAGAA
A_23_P126008	0.379	0.0143635	-2.69	-2.8995	-0.287	A_23_P126008	NM_015112	CATCCCCAAGCAGAAAGGCAACCATGGCAGGTGGGCTAGCCAACCTCCAGGATTTGGAAA
A_24_P341019	0.379	0.0143699	-2.69	-2.8998	-0.345	A_24_P341019	NM_001009924	GATGGCTACATTGACCTTCAGTTTAAGAAAACCCCTCCTAAGATCCCTTATAAGGCCATC
A_33_P3250398	0.379	0.0143891	2.69	-2.901	3.17e-01	A_33_P3250398	BC025419	TTCATGGGGTGAACCATGGGTAAGATGTTTTCATTTTCTTAAGGTCATTCCTAGAAAAAA
A_23_P121250	0.379	0.0143911	-2.69	-2.9011	-0.303	A_23_P121250	NM_001967	GAGATGCCCATGAATGTGGCTGACCTTATTTAATTCCTGGGATGAGAGTTTTGGATGCAG
A_33_P3354975	0.379	0.0143979	2.69	-2.9015	3.85e-01	A_33_P3354975	NR_026850	AAGAGCAACAAAGACTCCAGAACCCACTCTACCTCCTCAATCCCTTGGCCATCTGTGGAG
A_33_P3316078	0.3795	0.0144304	2.69	-2.9034	1.98e-01	A_33_P3316078	NM_001039938	CATCACATTTCATAAGTGGTCAAGGCATTTGGACATATTCACCTCCTATTACCTATTAAA
A_23_P161424	0.3798	0.0144545	-2.69	-2.9047	-0.31	A_23_P161424	NM_032812	GAAGGCTTTATTGTATCAGAGCAGTGCTAAAATTTCTAGGACAGAACAACACCAGTACTG
A_33_P3422233	0.3798	0.0144701	2.69	-2.9056	4.13e-01	A_33_P3422233	NM_020894	GACTCTTCTGCATCTCTTGCATTTCCAAATGAATTTTAGGATCCACTCATCAGTTTCTTC
A_32_P53524	0.38	0.0144987	-2.69	-2.9073	-0.794	A_32_P53524	NM_004822	GTTGGTTAGAGTTGTAATGGACCCAGATGGAACTTGTAATGTGGGCCCCACATGATAGAA
A_24_P630490	0.38	0.014514	2.69	-2.9082	3.16e-01	A_24_P630490	NM_001042702	TTGAAAGAAATAGAAGAGTGATGGATGTCATTTCTCGTTCACAGCTTTACTTGGATGATC
A_23_P26358	0.38	0.0145156	2.69	-2.9083	5.10e-01	A_23_P26358	NM_015092	ATTTGTCGAATGTACCGAGCAATTAGAATTGTTACCAGGAGAAAATATCAATCTACTTGC
A_33_P3364508	0.3801	0.0145455	2.69	-2.91	2.21e-01	A_33_P3364508	NM_018275	CTTATTTTCCAACTATTGCTTCCAACTGAAATAAGACTATTAAATGCCTGTTCAGGAGGG
A_24_P411561	0.3801	0.014557	2.68	-2.9106	4.50e-01	A_24_P411561	NM_032782	AGTGATCCTTAAAAGATTAAGAGATGACTGGACTAGGTCTACCTTGATCTTGAAGATTCC
A_24_P355649	0.3801	0.0145957	2.68	-2.9129	3.28e-01	A_24_P355649	NM_002017	GGGCTGTTTAAGTCACTGACTTATGAGAAAGCAAAGCACTGGTACAGTTATTTAACAGGC
A_33_P3385461	0.3801	0.0145991	2.68	-2.913	3.37e-01	A_33_P3385461	NM_024332	CATTTGCAGGAATTACAACAAGAAAAGGAAGAGCTTATGCAAGAACTTTCTTCTCTAGAA
A_32_P187704	0.3801	0.0145991	-2.68	-2.9131	-0.712	A_32_P187704		GGGAGGCTCAGATGTTATTTCCCAGGGATTCCTGTTTTTCCAGAAACGTTGTCACCAAAT
A_33_P3230663	0.3801	0.0145992	-2.68	-2.9131	-0.761	A_33_P3230663	AY203950	CCTAGGTTTAAGTGATATTCAGGCAGTCTGGCTTGGAAAGTCAAGTCAGGAGAAGAAAAA
A_33_P3309859	0.3802	0.0146158	2.68	-2.914	1.50e-01	A_33_P3309859		ATACCAATAGCATGAACTGCTTTCTTCCTGAACTGAAGGCAAGCCCATATGGTTGCCACT
A_33_P3387090	0.3816	0.0146838	2.68	-2.9179	2.41e-01	A_33_P3387090	BC026731	TATATACCGAGAAACTTGGGAGCAGGGGAAAAATGATTTCGACACACCCAGCTACAGTAC
A_23_P153767	0.3816	0.0146984	2.68	-2.9187	3.43e-01	A_23_P153767	NM_014371	GCAGTTTGGGATCATCCAGAAGCATCTGAAGACCATGGATCACAACCGGAACCGCAGGCT
A_33_P3398331	0.3816	0.014726	-2.68	-2.9203	-0.177	A_33_P3398331	NM_006690	GACATCACAGCATTTCAGTGTCAGTCACATTTTAAACTGATCAGCCTTTGTATAATGTTT
A_33_P3309481	0.3816	0.0147323	2.68	-2.9206	2.81e-01	A_33_P3309481	NR_002930	CCTCCACTGGGCCCTGTGCTGCAAAGGTAAAGGGTCTTGGAATAAAGACCTGTGGCCAAG
A_23_P6909	0.3816	0.0147391	-2.68	-2.921	-0.679	A_23_P6909	NM_178445	ACAAAGTGTGGAGGAGTTTCCTTTTGATTCTGAGGGTCCTACAGAGCCAACCAGTACTTT
A_33_P3382830	0.3817	0.014756	-2.68	-2.922	-0.208	A_33_P3382830	NR_038906	GCTGTGACATGCCCATTATGTACTCAATAAATCTTTAATAATTGAGTGGATAGAGTGATG
A_33_P3270776	0.3822	0.0147995	-2.68	-2.9244	-0.555	A_33_P3270776	NM_053044	GGCCACCATCAAAGACATCGACAAGAAGTCGGACATTGCCACCATCAAGATCCATCCCAA
A_33_P3299766	0.3822	0.0148023	2.68	-2.9246	3.78e-01	A_33_P3299766		AGTTCCTGATCCACACCATGTTCTTGGGCATTAGTACATGCATTAATGTCTTACGAATAA
A_33_P3243622	0.3822	0.0148153	2.68	-2.9253	5.37e-01	A_33_P3243622	NM_015726	TCCATTAATGATGAAAATCGAGTCCATGACCGCTCAGAGGAAGAGGAAGAGGAGGAAGAA
A_23_P78526	0.3822	0.014826	2.68	-2.9259	6.28e-01	A_23_P78526	NM_020219	TGACAACAACATCTATGAAGTGATGCCCTCTCCAGTCCTCCTGGTGTCCCCCATCAGTGA
A_32_P105549	0.3822	0.0148701	-2.67	-2.9284	-0.238	A_32_P105549	NM_001630	GGCAACTGAGACTGGGTACCTGGAGATTCTGAAGTGCCTTTGCTGTGGTTTTCAAAATAA
A_32_P394951	0.3822	0.0148721	2.67	-2.9285	2.64e-01	A_32_P394951	NM_145807	AAAGTAATTTGGGAGCGACTAGGAGCTGAGCCTTCTACCTCGACGGTGCACTGCAGAGAG
A_24_P302574	0.3822	0.0148756	2.67	-2.9287	2.46e-01	A_24_P302574	NM_022353	CCTGTAGACATGCTAAGGAAAATCTGCTTAGTATCGAGATCAAGAACTTTCATTCAAAAA
A_33_P3499174	0.3822	0.0148867	2.67	-2.9293	2.11e-01	A_33_P3499174	NM_001135947	ATACTTGATGGCGCGAATGTCCGTTTTCTCTCCCTTCCCACCTCCTGCAGGAAGCAGGAC
A_33_P3242080	0.3822	0.0149128	-2.67	-2.9308	-0.17	A_33_P3242080	NM_018332	CCCGACTCAATAAATAAATAAGGATGGATAAATTGTAGCGTATGCACCATTCATTATGCT
A_33_P3303602	0.3822	0.0149232	2.67	-2.9314	4.29e-01	A_33_P3303602	AK123378	AAGAGTCAAGGACCCTGGAGCCAAATGCCTGCGTTCGAATCCTGGCTCCTCACTGATTAG
A_23_P409462	0.3822	0.0149252	2.67	-2.9315	2.62e-01	A_23_P409462	NM_173674	GGAGAAAAAGAAAATAACAGGAATTAGGACCACAGGATCTACACAGTCGAACTTCAACTT
A_33_P3311911	0.3822	0.0149341	2.67	-2.932	1.42e-01	A_33_P3311911		AAGAAAGACAAAAATTAATTGAATACCATGGCTTCTGGGTATTCTTAGTGGGCTTGACAT
A_24_P331904	0.3822	0.0149503	2.67	-2.9329	2.33e-01	A_24_P331904	NM_017828	TCTCTCTTGAGAACTTGGCTCAGGGCTCCTGAGGACCTTTCCCAGCATTACCTTCCCTTC
A_33_P3282213	0.3824	0.0149695	-2.67	-2.9339	-0.275	A_33_P3282213		TGTCTTCTCGTTCCCACGCGAGTACAGGTTGGACAGCAGCTCTGAGAAGATGAACTCCTT
A_33_P3372084	0.3824	0.0149851	-2.67	-2.9348	-0.271	A_33_P3372084		ACAACAGGGCTAAAGCAAAAACGAAGAGCAAGCAACTTCCTACTGCAGCTCCAGATAAGA
A_33_P3223592	0.3826	0.0150058	2.67	-2.936	5.92e-01	A_33_P3223592	NM_000041	CGCCCCAGCCGTCCTCCTGGGGTGGACCCTAGTTTAATAAAGATTCACCAAGTTTCACGC
A_23_P117298	0.3829	0.0150311	-2.67	-2.9374	-0.45	A_23_P117298	NM_000131	TAGAGATATGCACACACAGATGCACACACAGATATACACATGGATGCACGCACATGCCAA
A_23_P63929	0.3831	0.0150506	2.67	-2.9384	1.70e-01	A_23_P63929	NM_018117	TCTCAAATATATGCTGTGCCTGTACTTATATACAGTCTTTCAAGAGAGATACAAACAAGG
A_33_P3358731	0.3844	0.0151158	-2.67	-2.9421	-0.499	A_33_P3358731	NM_006200	TATTCACCAACCAATGAATTTCCGAAAGTGGAACGGTTCCGCTATAGCCGAGTTGAAGAC
A_23_P69154	0.385	0.0151513	-2.67	-2.944	-0.501	A_23_P69154	NM_001129908	AACTGTAAAAATGTGTGATGCACGTGCATATGCAGAGTGGGAGAACTTTGTGTGTGTGTA
A_24_P38951	0.3855	0.0151909	2.67	-2.9462	2.90e-01	A_24_P38951	NM_032871	ATTGCCCTATCCTTGTGTCTCCACCCCCTTCCATGTGTTGAATAATAAAAGGTGGGAAAG
A_23_P112187	0.3855	0.0151975	-2.66	-2.9465	-0.281	A_23_P112187	NM_032843	AGGGCTGGGATGAGGCTTGTACAACCCCCACCACCAATTTCCCAGGGACTCCAGGGTCCT
A_33_P3304748	0.3855	0.0152118	-2.66	-2.9473	-1.25	A_33_P3304748		CCAGCACTTAGGACATAGACAAACACGAAGATGACAATCAATATTTGCCAAAATGAAAAA
A_24_P89509	0.3859	0.0152476	-2.66	-2.9493	-0.243	A_24_P89509	NM_001031712	GAAAACATTAGGGCCAATCTTCGTCAATATGGTTTAGAGAAGTATTACCTTGATGTCCTG
A_24_P77082	0.3859	0.0152557	2.66	-2.9497	3.11e-01	A_24_P77082	NM_003679	TCATGCGATTATGCCATCGACCTTTATCCCTCTCTATACAATGGTCACTTTTTCCAGAAT
A_33_P3408962	0.3859	0.01527	-2.66	-2.9505	-0.449	A_33_P3408962	XR_110352	AGCTGGACTGGCCTTACTTCTGCCTTTTTCACCTGTATGTTAAAAAACAAAAACAAAAAA
A_23_P92602	0.3864	0.0153022	2.66	-2.9523	3.22e-01	A_23_P92602	NR_002451	ACGCTAAGGTGTATTGGTTCCATTCAACAGCTGAAAAGTTTGGTAAAGATTATTTACTAG
A_33_P3260787	0.3864	0.0153267	2.66	-2.9536	1.76e-01	A_33_P3260787	AK000925	GGACCTTTGGTTATACCTGTAGTTACTGAGACCCATTTTAATAGTGGTTTTTTGGAATAA
A_24_P114617	0.3864	0.0153285	-2.66	-2.9537	-0.193	A_24_P114617	NM_014043	GCCTAATTGAAATATGTACTCTTATTTTAGACACGCCTCTGTTAAAACAGACCAGGTTTT
A_23_P351305	0.387	0.0153675	-2.66	-2.9558	-0.448	A_23_P351305	NM_152704	GCCTTTGCAGAAAACAGAACTTAGCCAAACCTAAGTAAGAGTCATGCCTGGATATTGGGA
A_33_P3333360	0.3873	0.0153916	2.66	-2.9571	3.67e-01	A_33_P3333360	NM_001199054	TCTGGGCTGCTGCCTGATCCCCTGCCTCATCAATGACTTCAAGGATGTGACGCACACATG
A_23_P128598	0.3874	0.0154098	-2.66	-2.9581	-0.374	A_23_P128598	NM_006001	ACGGCAAGTACATGGCCTGCTGCATGTTGTACAGGGGGGATGTGGTCCCGAAAGATGTCA
A_33_P3259042	0.3876	0.0154318	-2.66	-2.9593	-0.298	A_33_P3259042	NM_001146313	AGACAGCAGTCATGGTGCCGGGGGAAACCCTTGTCCCAAAAGCCCATGTGTACAGCAAAA
A_23_P85140	0.3882	0.0154684	-2.66	-2.9613	-0.276	A_23_P85140	NM_080390	AGAAAAACCAACAAGGGGCTGGCTCAGTACCTCAAGCAATATAAGGAAGCCATACATGAT
A_24_P85258	0.3891	0.0155202	-2.66	-2.9641	-1.01	A_24_P85258	NM_001080484	GGCACAAGTGGACTCTGCTATCCCATTCGATCCATTCGTTGTCCGTGTCAAAAATCAATT
A_23_P154643	0.3895	0.0155478	-2.65	-2.9655	-0.258	A_23_P154643	NM_001719	ACTGTGTCTCCATCTTGACTCAGACAGTTCCTGGAAACACCGGGGCTCTGTTTTTATTTT
A_23_P170733	0.3901	0.0155923	-2.65	-2.9679	-0.266	A_23_P170733	NM_058172	TTGGTGTCCAGGTTTGTGGCACTGTTCCAAGAGGCCTTACACACACACACAAATATACAA
A_23_P203920	0.3901	0.0156082	-2.65	-2.9688	-0.317	A_23_P203920	NM_005086	AATGTTTTGATTTGCTTTAAAAATGGCCTTCCTACACATTAGCTCCAGCTAAAAAGACAC
A_33_P3225983	0.3901	0.0156147	2.65	-2.9691	4.40e-01	A_33_P3225983		GCCACAAGAATAACGGGCGGTGGGAAATCTGGAACAGGTAATTTAGCAATATACATTTAA
A_33_P3377519	0.3909	0.0156586	2.65	-2.9715	5.72e-01	A_33_P3377519	NM_024014	GGCTTCCGCAGCTTCAGGGGAGCCCGGAGCTTTGCAAGCGTCTGTGCATTTATTTCTTAC
A_23_P126844	0.391	0.0156914	2.65	-2.9732	5.68e-01	A_23_P126844	NM_148965	CGAGAGGGGGTGAAGACATTTCTCAACTTCTCGGCCGGAGTTTGGCTGAGATCGCGGTAT
A_33_P3356492	0.391	0.0156918	-2.65	-2.9732	-0.309	A_33_P3356492	XR_109744	GGGCATCGACAAGGAGGATGCCGCCCAGGGCATCGCCAACGAGGACGCCGCCCAGGGCAT
A_23_P94397	0.3911	0.0157075	-2.65	-2.9741	-0.568	A_23_P94397	NM_005014	TTATGGTGAACAACGAAGCACTAATGGTCAAACAATACAACTAAAGACACAAGTTTTCAG
A_23_P78092	0.3918	0.0157503	2.65	-2.9763	4.52e-01	A_23_P78092	NM_001003927	GCTGAATCAGACACTTGGAAAAGAACAAAACAGCTCACAGGACCCAACCTAGTGATGCAA
A_23_P360804	0.3918	0.0157725	2.65	-2.9775	3.61e-01	A_23_P360804	NM_020939	TGGTTCTGTGCCCGTCTCTGAGACAGTCTCTGTGTGGAATTTGCCTTAAACTGAAGTAAA
A_23_P165078	0.3918	0.0157961	2.65	-2.9787	2.08e-01	A_23_P165078	NM_031213	GTGCCGCGGTGGTGCTGCACTCGCCGCTCACCTCGGGCATGCGCGTCGCCTTCCCCGACA
A_23_P97250	0.3918	0.015809	2.65	-2.9794	1.86e-01	A_23_P97250	NM_001037533	CCAGTACTCCAGAGGAAGAATGCTTTTCTTGGGAGCCATAGGGTGAATAAAGGAATGTTT
A_32_P393316	0.3918	0.01582	2.65	-2.98	4.67e-01	A_32_P393316	NM_001098531	TGGCTGCTCTCCTTCCCAATAGTCACAAGATTTACCATGATAATAATAGGTTAAGACTTG
A_23_P409626	0.3918	0.0158206	-2.65	-2.98	-0.21	A_23_P409626	NM_001079559	TTTACGGGCGAGATTATGAGTACAACAGATACAGAGACTATTACAGACAATACAATCGGG
A_33_P3218252	0.392	0.01584	2.65	-2.981	2.78e-01	A_33_P3218252	NM_015092	GTCCTGTTCTGAAATAAAACATGAGGCTTTTAAGAATCATGTGTTCAATGTAGACAATGC
A_23_P142424	0.3922	0.0158632	2.64	-2.9823	4.33e-01	A_23_P142424	NM_024660	ATGCATTGCGGGTGCTGTCCAAGCTTGGCTCATCTGGGGTTTGCTGGGCTTAACACCCAA
A_23_P82929	0.3922	0.015878	-2.64	-2.983	-0.642	A_23_P82929	NM_002514	TAGGCTGCAAAATTAAATCTAGACATTCTTTTAATGCCACCACACGTGTTCCGCTTCTCT
A_23_P393645	0.3923	0.0159202	2.64	-2.9853	3.16e-01	A_23_P393645	NM_139025	CTACTTTAGAGTCTTCTCCAATGTCCAAAAGGCTAGGGGGTTGGAGGTGGGGACTCTGGA
A_24_P324814	0.3923	0.0159216	2.64	-2.9853	3.81e-01	A_24_P324814	NM_138363	TGGCCCAACACTAAGCAAAATGTGGAAACAGCAAATTGCACAGGTTGAACAGCTTAAGAA
A_23_P216429	0.3923	0.0159403	-2.64	-2.9863	-0.771	A_23_P216429	NM_017680	AAAGCCTTCAGTAAATGTTCATTACCAACTTGATAAATGCTACTCATAAGAGCTGGTTTG
A_23_P67529	0.3923	0.0159519	2.64	-2.9869	4.00e-01	A_23_P67529	NM_002250	ACTCTCACTATGCTGCTATGGACGACCTCCAGCTCTCAGTTACAAGTGCAGGCGACTGGA
A_32_P21246	0.3923	0.015959	2.64	-2.9873	2.62e-01	A_32_P21246	NR_026791	GGCTTTACAAAATAAAATCATGCTTGGAAAACTTCTCCTCTGAGGGATGTCAAAGGCTGC
A_23_P66608	0.3923	0.0159622	2.64	-2.9875	3.79e-01	A_23_P66608	NM_021078	CTTGAGTGATGGCTTCAGGGGTTGGAAGTTCAGCCCAAACTGAAGGGGGCCATGCCTTGT
A_24_P583225	0.3923	0.015982	2.64	-2.9885	3.49e-01	A_24_P583225	NR_026999	GCAGTAAAGATGATTCTGAAGAATGGCATGGGATGGATCCTTTCGAATGCACTTGAGCAG
A_23_P88069	0.3923	0.0159896	-2.64	-2.9889	-0.247	A_23_P88069	NM_005780	TTCCAGTCATTGGATCGTGTTTTCTTTTGTCCATTATTGTACTGTGCTGTACCACATTTA
A_33_P3348194	0.3923	0.016014	2.64	-2.9901	1.90e-01	A_33_P3348194		GCCACATTGAAGGGACTATCTATCCAAATTTTAAGAGTCTATTATGGCATATTAAGGAGA
A_23_P401675	0.3923	0.0160196	-2.64	-2.9904	-0.476	A_23_P401675	AK055094	GGACCCCCCAAATGGAACAACTTCACTTTCTCTTTTATGTATTGAGCCCTGTGTTAACAT
A_24_P316019	0.3926	0.0160503	2.64	-2.992	2.29e-01	A_24_P316019	XM_003118656	AGAAGCTTCGGCAGCTGGCCAAGCCACAGAGCGTCTTCGAGGAGCTGAACAATGAGAACA
A_23_P202860	0.3926	0.0160916	2.64	-2.9942	1.98e-01	A_23_P202860	NM_024514	CTCATCTGTGCTGAAAGACGCTGAAACTGCCTGGGATGTTTTCGGGAACAAGAATGTATA
A_33_P3231252	0.3926	0.016092	-2.64	-2.9942	-0.358	A_33_P3231252	NM_005599	GCTTCTTTGTGTGTGTGATGTTTGTGCGTGTGATGAATTTAGCAAATTAAGTTATTTTCC
A_23_P212126	0.3926	0.016097	2.64	-2.9945	2.59e-01	A_23_P212126	NM_080538	CATCACCATTTTTCCTGAGTAGGGCTTAGTTTTATTCTGGAAAGACATCTCCAAGGTGAG
A_23_P45389	0.3926	0.0161003	-2.64	-2.9946	-0.329	A_23_P45389	NM_004251	CTTTGAGGAAGCGGTTCGAAGAGTTCTTGCTACCGAGGATAGGTCAGATCATTTGATTCA
A_23_P152651	0.3926	0.0161151	-2.64	-2.9954	-0.26	A_23_P152651	NM_007372	TGAGTTGTCATGCGGGTAAGTTGAGGTTATCTTGGGATAAAGGGTCTTCTAGGGCACAAA
A_23_P201628	0.3926	0.0161277	-2.64	-2.996	-0.256	A_23_P201628	NM_002293	ACCTTAATTACACTCCCGCAACACAGCCATTATTTTATTGTCTAGCTCCAGTTATCTGTA
A_23_P2942	0.3942	0.016208	-2.63	-3.0002	-0.223	A_23_P2942	NM_022123	TCAAGATGGAAAGAGACAAGCATAAACAATGTGCCCTGTTTGACTAAGTCAAATGAAATA
A_33_P3228023	0.3944	0.0162274	2.63	-3.0012	3.58e-01	A_33_P3228023	NM_021626	CATTTTCTCAGAGTCCTATGGAGGAAAAATGGCAGCTGGCATTGGTCTAGAGCTTTATAA
A_24_P124370	0.3945	0.0162449	-2.63	-3.0021	-0.257	A_24_P124370	NM_018222	GTCTATCTGCAGTAATTGAGGACCCATAAAATTTAGATAACTACATGTCTTTGCTCTTAG
A_24_P347624	0.3946	0.016277	-2.63	-3.0037	-0.239	A_24_P347624	NM_022804	GCTTACACCTGAGACGAACTACAGAACAGCACGTACCAGAGGTGGAAGTCCAAGTCAAAC
A_33_P3379056	0.3946	0.0162779	-2.63	-3.0038	-0.321	A_33_P3379056		TGTACATGTGCATACACCCATCCTCATGGACACACACACGTACATACGCGCATACACCAT
A_33_P3418209	0.3956	0.0163333	-2.63	-3.0066	-0.716	A_33_P3418209	NM_004791	TGCTGGGATGGATGGAATGGAAATGCATGTGAAATCTGGCTTGGCTCAGAATATCCTTAA
A_23_P80278	0.3957	0.0163703	2.63	-3.0085	2.84e-01	A_23_P80278	NM_001007467	CTGGGCTGTCGGGGAGGCCTCAGGCCACCTCCAGGAACAGAACACAGTTTTAAGTTTGAT
A_33_P3415097	0.3957	0.0163784	-2.63	-3.0089	-0.229	A_33_P3415097	NM_001830	TTGATGAGATATATTCACATTTGGTGTTGGAACGACCACATAGCAACGTGTTGGTTTTTT
A_33_P3332006	0.3957	0.0163789	-2.63	-3.0089	-0.231	A_33_P3332006	NM_006807	TAGAGGAGATAAGACAGTAGGGAAAGACAAGGGCCCATGCTTTTAGTGGGGAAAACTCTT
A_23_P393099	0.3957	0.0163909	-2.63	-3.0095	-1.29	A_23_P393099	NM_003226	TGTCCCTTTGCTCCCGGCAAGCTTTCTGCTGAAAGTTCATATCTGGAGCCTGATGTCTTA
A_23_P117424	0.3957	0.0164239	-2.63	-3.0112	-0.489	A_23_P117424	NM_025230	TTAATCATGTTTGAATGTTAGGGGTTGGATCCTAGAGTAGATGCCTGAGGCCACATCTGA
A_33_P3802558	0.3957	0.0164588	2.63	-3.013	2.64e-01	A_33_P3802558	BC015643	ATCAGACAACTTCTTCCTTCTCCGTGGAGCTCAGAGGCAGCTTACGTTGTGATTAGAAAT
A_33_P3389060	0.3957	0.0164733	-2.63	-3.0137	-0.29	A_33_P3389060	NM_018249	TGAAATGGACATTCAAACCCAAGAGGCTCCCAGCTCCACAAGTCAAGAGCTGGGAACAAA
A_24_P7143	0.3957	0.0164745	2.63	-3.0138	3.20e-01	A_24_P7143	NM_012223	TCACCAGAGAAAGTGGAAGAATACAGGAACAGAAATTTTTATGAACTGAGCCCTCACATC
A_24_P147242	0.3957	0.0164857	-2.63	-3.0143	-0.574	A_24_P147242	NM_145893	ACCCTTTAAACCATTCCACCCGGCAGTATTCAGCTTCTTAACCAGTCGCTATTTAGGAAA
A_33_P3280694	0.3957	0.0165087	2.63	-3.0155	2.03e-01	A_33_P3280694	AL834358	GTTGTGTGTAGTATATAGTTGACTCGCAGTTTCCTGTGAATCTGTAATTGTTTCAGAATA
A_23_P113748	0.3957	0.0165119	-2.63	-3.0156	-0.21	A_23_P113748	NM_024697	TGGCAATAGCTCATGTCCTTCTACTGAGACCGAGGAAGAAAAGGCAAAACGGCTTCTTTA
A_33_P3235004	0.3957	0.0165171	-2.63	-3.0159	-0.394	A_33_P3235004	NM_005964	CTGTTTACTTGAAGAAAAAAGCACCCGTGGAGAATAAAGAGACCTCAATAAACAAGAATA
A_24_P862886	0.3957	0.016526	-2.63	-3.0164	-0.325	A_24_P862886	NM_000798	GGTGAACATCAGCAATGAGCTCATCTCCTACAACCAAGACATGGTCTTCCACAAGGAAAT
A_23_P428887	0.3957	0.0165326	-2.63	-3.0167	-0.371	A_23_P428887	NM_153270	GGGCGGGGGGTCAAATAGAAGGCTATATGAATCAACTTCAGTGAGCTGGTGAAAGAAAAT
A_32_P191503	0.3965	0.0165897	2.62	-3.0196	5.04e-01	A_32_P191503	NR_026999	TTTTTTATCTTTTGTGTATAAATCCCAAATTATGGAATTTTGGAATATTTCCACCATTAT
A_23_P258272	0.3965	0.0165948	2.62	-3.0198	2.80e-01	A_23_P258272	NM_001039707	TGTATACCCTGAGGTCACCACCGCTCGATCTAAATGTGCAGTTGTGTCCTTAAATATGCA
A_23_P103601	0.3967	0.0166333	-2.62	-3.0217	-0.454	A_23_P103601	NM_020379	GGGGTTTCCCTTTGGGCCTCAGTGTTACAAATTACTAGTGCTATTTTCATTATTATTGTA
A_24_P49190	0.3967	0.016652	-2.62	-3.0227	-0.532	A_24_P49190	NM_181655	GTAAGCGCACTAGTCAAAAGACATTTATGTTTGAAATGTCATTTAGATCAAACACAAGGG
A_23_P58579	0.3967	0.0166648	2.62	-3.0233	2.62e-01	A_23_P58579	NM_032765	CATTAAAAACAGTGGAGTGTTCTGCAAAGCCCGATTCTCTGCAGCTTTAAGACTGGACAG
A_33_P3415551	0.3967	0.0166795	2.62	-3.024	7.22e-01	A_33_P3415551	NM_207328	GGAGAGGAGGCTGCAAACCCTTAGCTGCTCTATAAATATAATCATTGAGGCTTGATTGTC
A_23_P153562	0.3967	0.0166802	2.62	-3.0241	5.55e-01	A_23_P153562	NM_001736	TCTCAAAAGTTCTTTGGGACAAAACAGAAGTCCATGGAGTTATCTAAGCTCTTGTAAGTG
A_23_P147070	0.3967	0.0166862	2.62	-3.0244	3.45e-01	A_23_P147070	AK022469	GGTTTGTGCTTGGAATTCAAGTGCTTTAAAGTCTTGCTGTAAAAACTGACAGGAATAGTA
A_33_P3330099	0.3971	0.0167195	2.62	-3.026	2.57e-01	A_33_P3330099	NM_001669	AGTGCATCCCTAGGCTGGCAGTGCAGCAGAAATACTGAATAAAATGTGACAAATCTCCCT
A_24_P238040	0.3971	0.0167312	-2.62	-3.0266	-0.252	A_24_P238040	NM_004505	CAAGAGGTCATCTGAACACATCCACCACATCGACCTGGACGTGAGGACGACTCTCCGGAA
A_33_P3279311	0.3971	0.0167432	-2.62	-3.0272	-0.226	A_33_P3279311		TATGTCTGACCAATGGCAGAATGACCAATGATTTAGAGAATCAACCTGGGACAGGGCCAT
A_23_P206022	0.3971	0.0167664	-2.62	-3.0284	-0.552	A_23_P206022	NM_001004439	GACACATGAAAGGCATCAGTCCCCCTGTGCATAGTACGACCTTTACTGTCGTATTTTTGA
A_23_P257043	0.3971	0.0167816	-2.62	-3.0291	-0.501	A_23_P257043	NM_005261	GGACCTTGCTGGAAACAAAGGCTTAGCAAACAATTTTTGTTCAATGCCCACCAAGACATA
A_23_P218237	0.3971	0.0167843	2.62	-3.0293	3.74e-01	A_23_P218237	NM_000229	TGACTTCCAACGCTTCTTTGCAGACCTGCACTTTGAGGAAGGCTGGTACATGTGGCTGCA
A_23_P67299	0.3971	0.0168135	2.62	-3.0307	5.16e-01	A_23_P67299	NM_020812	GACTTCTGCAAGAAATGTGAGGATGCGCTGCGGAAAAATAAGGCCCTGATTGGGCCGGAC
A_33_P3295333	0.3971	0.0168208	2.62	-3.0311	3.01e-01	A_33_P3295333	NM_016511	GCACCTGTAATAGTTTCAGTTCCTATTTTCTTCCATTGACCCATATTTATACCTTTCAGG
A_23_P218770	0.3971	0.0168363	2.62	-3.0318	6.25e-01	A_23_P218770	NM_002872	ATATCTGCTCAGCCAATGGAAAATCTGGGTTCAACCAGCCCCTGCCATTTCTTAAGACTT
A_33_P3265564	0.3971	0.01684	-2.62	-3.032	-0.523	A_33_P3265564	XM_927497	ATTCAATGGAAGAAGAATAGTCTCAATAATGGTGCTGGATTAGAACCTGTGGAAAAAGGC
A_33_P3407049	0.3977	0.0168871	-2.62	-3.0343	-0.658	A_33_P3407049		AAGAGAAGCTCACTGCAGAATGGACTAGAAGCCAAAACTATGACACTTGAGTTTTTCACC
A_23_P311010	0.3977	0.0168963	2.62	-3.0348	2.40e-01	A_23_P311010	NM_005840	CAGAGAGGGCCACTTCTACCCCCCTAGGAGTCATACATCTGGCTACTTATTTGTTAAAAA
A_24_P181055	0.3977	0.0169094	-2.62	-3.0354	-0.348	A_24_P181055	NM_006278	CCCAGACGCCTACAACAAGAAGCAGACCATTCACTACTATGAGCAGATCACGCTCAAGTC
A_33_P3292287	0.399	0.0169894	-2.61	-3.0394	-0.946	A_33_P3292287	NR_022006	TGTTGCATGAACACACACACAAACACACACCCACAGAACTCACACTATAAGATAGGAGGG
A_24_P160202	0.399	0.0169951	-2.61	-3.0396	-0.187	A_24_P160202	NM_052839	CCACCAGCAACCCGCTTCCGCAGCCCTTCAAGGAGCCGCTGGCCATCATGCGCGTGGAGA
A_24_P53215	0.399	0.0170083	2.61	-3.0403	2.82e-01	A_24_P53215	NM_199242	TACAGGCACAGAGTCTCCTGGAAAAGGGAGAGGGGACCCTGCCAAAGATGAGGCTCCAGC
A_33_P3211443	0.399	0.017018	-2.61	-3.0408	-0.242	A_33_P3211443	NM_015350	CTCAATACTCTTCCTCTTCCTGTAACAGAATATTTACAGACGTGCTTAGACAAATGTTGA
A_23_P29185	0.3992	0.0170401	-2.61	-3.0418	-0.417	A_23_P29185	NM_001145418	TTTCTAAGGCTTTCGGTTGCTGGTTGGGGGTGGGATATATGAAATTTCAGTTGAATTCTA
A_33_P3618434	0.4001	0.017094	-2.61	-3.0445	-0.257	A_33_P3618434	AI016765	TGAGGAACAGCTTTCCAGTCCACAGAGCGGAACCACCGATGGCGTTTCACATCATTCGCC
A_33_P3377005	0.4008	0.0171512	2.61	-3.0472	5.21e-01	A_33_P3377005	NM_173573	CTGTGTCCGCTGCATCATTTATTGAACCAACGTGGCCTACAAAGTAAACCGCATTTCTGT
A_23_P421011	0.4008	0.017178	-2.61	-3.0485	-0.348	A_23_P421011	NM_030929	TCGAGATCTTATACCACTCTGTATTGGACAAAGGCTAGCACAGGGCTAGGCACCAATAAA
A_24_P943922	0.4008	0.0171829	-2.61	-3.0488	-0.318	A_24_P943922	NM_020925	CCCACTCCACAAAATAGGAAAATGAAGAAATCTTTCTCTCTGACTTGTTTACATCATTTC
A_24_P246351	0.4008	0.0172079	-2.61	-3.05	-0.519	A_24_P246351	NM_138411	GACTCTGAGTCTTCCAGCATCCTTCAAGGTCACCGAATGACCAGAGATCAAAGTACCTTG
A_23_P256047	0.4008	0.0172098	2.61	-3.0501	3.64e-01	A_23_P256047	NM_022096	GTATTAGATACCTTGGGTTGAATACACTTTTAACAGCCCTAGATCGATAGCCCTAGCCCT
A_23_P302550	0.4008	0.0172514	2.61	-3.0521	5.90e-01	A_23_P302550	NM_130782	GAGTCTAAGGCCCTAGCGATTTGGGCATCTGCCACATTGGTTCATATTCAGAAAGTGTTA
A_23_P259344	0.4008	0.0172533	2.61	-3.0522	2.83e-01	A_23_P259344	NM_031890	GACTAGACCCTCTCTAAAGACTGTTCCATTTTAACATGTCCTGATTCTGCATCCGTGGGT
A_33_P3601163	0.4008	0.0172667	2.61	-3.0528	2.60e-01	A_33_P3601163	NR_024333	GCTTTTCAGATACAAATCCACTGAGCCGGTGTACATCTAAATAAATCCTCCTGTTTCCCG
A_23_P65129	0.4008	0.0172669	-2.61	-3.0528	-0.399	A_23_P65129	NM_032840	TTGCTGCTTGTGCCAGTTGCCTGTTTCGCTTCAGTGTTTGATTCTAGCACTTACATGTGT
A_23_P135977	0.4008	0.0172676	-2.61	-3.0529	-0.205	A_23_P135977	NM_001008938	AAGTCCTCATAGTTTAAAATGGCCTCAGCAGGCCTAGTGTATACAAACTGGTTGTATGTA
A_23_P321511	0.4008	0.0172837	-2.61	-3.0536	-0.457	A_23_P321511	NM_178450	TCGGACCAATCAGAGGGTGATTCTCCTCATTCCAAAGTCTGTCAATGTACCTTCTAACCA
A_33_P3381305	0.4008	0.0172935	-2.6	-3.0541	-0.477	A_33_P3381305		TCCATCCATCCATCCATCCATACATACATACATGCATACATCCACCTATCTCTTCATCCA
A_33_P3239267	0.4014	0.0173323	-2.6	-3.056	-0.473	A_33_P3239267	NM_203370	TGATGTCAGCTACCTCTGACCCTGCCCTCCAGCCTGGGACAATAAAAGCCTTTTTTCTAG
A_33_P3571254	0.4017	0.0173737	2.6	-3.058	2.77e-01	A_33_P3571254	AL049782	GGCTGTCTTAATAGTGCGCCTGTTACTAATGGAATTTACTTAAAAAGTAAGTTTGCCATA
A_33_P3840630	0.4017	0.0173742	2.6	-3.058	3.64e-01	A_33_P3840630	NM_015030	CACTGATAACTTTCTGGCAGCATCTACTTTTTAGTGTAACTAATGTCAAACTGTATCATC
A_33_P3236703	0.4018	0.0174054	2.6	-3.0595	3.18e-01	A_33_P3236703	NM_001244752	CATAAGAATTCCTACTTCAAACCCACAGACTTCAAATAACTGCAAGAACTCCTTGACTGA
A_23_P135132	0.4018	0.0174106	2.6	-3.0597	1.68e-01	A_23_P135132	NM_174938	ATCCAGTCAGATCAAGACTGTATCAAGCAGCAAGATATTTTTTAAAGGAAGTAGATTTCG
A_33_P3795707	0.4018	0.0174203	2.6	-3.0602	2.73e-01	A_33_P3795707	CU457294	TTAACAAGCTCATGAGATCATCATAGAAGTCTGCCAACCAAAGGAGCCTGCTACATTTTT
A_33_P3239634	0.4019	0.0174395	2.6	-3.0611	2.06e-01	A_33_P3239634	NM_002505	CCAATAATTCCGAGGAACATTGGGGGTTAAATACCAAGAATAAAAATTGGTTCTTCTTTG
A_23_P7397	0.4048	0.0175772	-2.6	-3.0676	-0.231	A_23_P7397	NM_018930	TCACTTCTGTCTATAGTGTACTTGCTCTATTTAAGAAGGCATATCTACATTTCCAAACTC
A_33_P3423121	0.4055	0.0176245	2.6	-3.0699	2.34e-01	A_33_P3423121	DQ916738	GCAGAAATCGATGCAACATTTCTTTCCTGTCTGGGCTGTTTGTATAATTGTATATAAATG
A_33_P3360665	0.4066	0.0176922	-2.59	-3.0731	-0.358	A_33_P3360665	NM_001105	ATAGTGTCAAGAAGGAAGATTTGACGTTGTTGTCATTGTCCAGCTGGGACCTAATGCTGG
A_23_P11800	0.4066	0.0176991	-2.59	-3.0734	-0.343	A_23_P11800	NM_018584	AAGCTTGTGTTTCTTTGTTGCTGCAAGCTATCTGCCCAAGTTAATGCAAATGGACACATT
A_23_P501538	0.4086	0.0178032	2.59	-3.0783	2.37e-01	A_23_P501538	NM_153631	TAATTCCTTTAAACGGTAACGATGCAATAAAACCAGAGAAGATCCAGCTTTTGAAAACAG
A_33_P3325704	0.4087	0.0178371	-2.59	-3.0798	-0.484	A_33_P3325704	NM_001024209	AACCATCAAAAAATGCTGTTGATGTTTTCTGTGTCTGTCTGTCACCTGGGCATGGGCTTC
A_33_P3386242	0.4087	0.01784	2.59	-3.08	1.65e-01	A_33_P3386242	NM_006314	GTCTGTACAGGTGTTCTTTATTTTACATGAGGGCTACTTTCCAACCAAATAAAGTCAATT
A_23_P390116	0.4087	0.0178484	2.59	-3.0804	3.15e-01	A_23_P390116	NM_153023	GGGTCCTCAGTGCAGAGCAACTTACGCATCCTCAAGAATCCACTGCTTTTCAGGCAAGGA
A_23_P39525	0.4092	0.0178877	2.59	-3.0822	3.33e-01	A_23_P39525	NM_024785	TACAAACCAAAGAGGAACATTGAGCACAGTGGGAAAATTGGACTGGTTGATCTGGTCACT
A_32_P93852	0.4092	0.0178979	-2.59	-3.0827	-0.163	A_32_P93852	NM_138369	TCCTTTGTAACGAAACATGAAATCCTAGAATGTATGAGAAGTTCAGACATTAGGCATAAG
A_24_P401830	0.4096	0.0179333	2.59	-3.0843	2.19e-01	A_24_P401830	NR_034182	TCACTCTAAACCAACTCACTTCTTAAAGATTTCTCTGCCTTATAAGAAATAATAGCCATG
A_33_P3408757	0.4096	0.0179438	-2.59	-3.0848	-0.25	A_33_P3408757		CGTGTCGAGGCTGTGTAGAGTGCATTGTACAGCATATTTTCATGAATAAAATTGTTTTAA
A_23_P78871	0.4101	0.0179831	2.59	-3.0866	2.61e-01	A_23_P78871	NM_024076	TCCAGTTTTCTCATGCGAATATGCACAGTTTTAATTCACGTTGTTACACTAGCCTGCCGA
A_23_P64058	0.4101	0.0179941	2.59	-3.0871	5.48e-01	A_23_P64058	NM_153819	GGCCAGGGCTGGTGTCCCTAAGGTTGTACAGACTCTTGTGAATATTTGTATTTTCCAGAT
A_23_P91001	0.4109	0.0180541	-2.58	-3.0899	-0.232	A_23_P91001	NM_019048	CGAGGAATTGGTGAAAAATTACTTTTACGCCTTGCAGCTGTGGAACTTGGTCTTACAGCC
A_32_P186731	0.4109	0.0180774	-2.58	-3.091	-0.568	A_32_P186731	NM_080826	TATCATTCTGCTAAACGGCCCCAAAACAGTAGAATTTCTGCTCATGTCCTAGCAGGTTCA
A_33_P3405904	0.4109	0.0180881	2.58	-3.0914	2.58e-01	A_33_P3405904		AACTAGGCTGAAGAGAGAACTGGGCAGAGCCTTCTTCACACAGCCTTTTAAACATTTTTT
A_33_P3338121	0.4109	0.0181057	2.58	-3.0923	5.77e-01	A_33_P3338121	NM_001017402	ACAAAGATGGTGGAGATTGGCATGCCATTGAAACTAAGAGCTCTCAAGTCAAGGAAGCTG
A_23_P142075	0.4109	0.0181121	2.58	-3.0926	1.11	A_23_P142075	NM_001611	TTTGCTGAGTTCCGGGGTGCAATGGGGGAGGGAGGGAGGGAAAGCTTCCTCCTAAATCAA
A_33_P3287223	0.4109	0.0181177	-2.58	-3.0928	-0.547	A_33_P3287223	NM_001935	TACTGATGTTCCTAGTGAAAGAGGCAGCTTGAAACTGAGATGTGAACACATCAGCTTGCC
A_24_P706314	0.4113	0.0181483	2.58	-3.0942	3.01e-01	A_24_P706314	NM_194247	CAGAACCCAATTTCTACGCGTGTTGAATAAGGTAACAGCCTTTGATGAATTTCCTTCACA
A_23_P132237	0.4118	0.0182052	-2.58	-3.0968	-0.274	A_23_P132237	NM_015370	CCACCACCATGCAAGTTTGGAGAAGGAAAACTCTCGAAGAGATTAAAGCACAAGGACGAT
A_33_P3334803	0.4118	0.018215	-2.58	-3.0973	-0.251	A_33_P3334803		TTTCTTGGCAGGGCTCTGGGGCAGAGACTTTCAGCAGGGCCAGAGAAAGGGTCTATAGCT
A_33_P3240532	0.4118	0.0182243	-2.58	-3.0977	-0.331	A_33_P3240532	NM_015149	TTTGGTTAAACTAATAAACTAGTTTGGGACTTGGCTGGCATGTGCTGCCAGACCCAAAGG
A_33_P3356371	0.4118	0.0182391	2.58	-3.0984	1.73e-01	A_33_P3356371	AK127766	CAAGGGTCAGATAATTCTCTTCTGTGATAAGTTTTACTAGTTTAGAAGCATACATCCAAG
A_33_P3393341	0.4118	0.0182542	2.58	-3.099	2.83e-01	A_33_P3393341	NM_022896	CAGCTGCCTAAGCCCTCACCTTGGGGGAGGATCAAAGGGAATAAAGAGAACTCTTGGCTG
A_33_P3387145	0.4118	0.0182758	2.58	-3.1	2.97e-01	A_33_P3387145	NM_031892	GCCAATCAAACTAAGACCAAGGTCAATTGAAGTAGAAAATGACTTTCTGCCGGTAGAAAA
A_23_P66050	0.4118	0.0182973	-2.58	-3.101	-0.269	A_23_P66050	NM_033309	GACTTAGGGAATCCTACCACTCTGCTGGATTTGGAACCCCCTAGGCTGACGCGGACGTAT
A_33_P3417472	0.4118	0.0183124	2.58	-3.1017	2.57e-01	A_33_P3417472		CCTACTTCATTATCAAGCTATACTATTTTATTCATGCAGTTTGATGATCTTATGGCGGAG
A_23_P204417	0.4118	0.0183226	-2.58	-3.1022	-0.213	A_23_P204417	NM_018463	GATCTTTCTACAGTCTGGTCTTACCCATGTTCCTAGCAACCCTGAGATGATTTTCTTCCA
A_33_P3353471	0.4118	0.0183341	2.58	-3.1027	1.60e-01	A_33_P3353471	NR_027021	TTTCACTCTGGCATACTCTCTCAGTGTGGAAGCTGCTGATTCAGAAAGAGATGTTCCAAA
A_23_P73239	0.4118	0.0183472	-2.58	-3.1033	-0.198	A_23_P73239	NM_205842	ATAGCATTCATCTGTGTGTAGATTATTTCATATAGGGAAGAGTTCTGATCTGTACCTATG
A_23_P31273	0.4118	0.0183514	-2.58	-3.1035	-0.675	A_23_P31273	NM_001635	TGCAGAAGGCTACATATACATAGTTGCTTCTTTCCTTTCCATTGTAGCTCTTTGCCTCTC
A_23_P144911	0.4118	0.0183601	2.58	-3.1038	5.85e-01	A_23_P144911	NM_152403	ACAGCAGAATGACTGTGTGACCTTGAACTTCACATTTCCCACATTGGCCCTTGGATTGTT
A_23_P1431	0.4121	0.0183924	-2.58	-3.1053	-0.221	A_23_P1431	NM_004329	CGTTTGTATTCTACCTTTGTAAAACAGCCTATAGATGATGATGTGTTTGGGATACTGCTT
A_33_P3342300	0.4121	0.0184002	-2.58	-3.1057	-0.554	A_33_P3342300	DQ854811	ACCAGGGCATTGTTCTGACTTTTCTGGACTTCCTCAACCCAAAATGCCTTGAAGAAAAAA
A_33_P3416937	0.4121	0.0184178	2.58	-3.1065	4.25e-01	A_33_P3416937		AAAGGTAGAAGACGTCATCAAGAGGAAAATGATGCCTCTAAGCTTGGGACTGCATCTTCC
A_33_P3352148	0.4121	0.0184316	2.57	-3.1071	2.52e-01	A_33_P3352148	NM_001122772	TTTTTCTGGCTAAAATAGTTTGCAAAGGACCAGGTAATTGGGGAGGGGAGAGAGGTGGGG
A_33_P3384642	0.4124	0.0184617	2.57	-3.1084	1.58e-01	A_33_P3384642		TGCCTTCAGAAGCAAAAGGCAAGAGGAAAATTATAGTCGTGTTAGAGATGAAGTTTTAAA
A_32_P101699	0.4124	0.0184791	2.57	-3.1092	2.86e-01	A_32_P101699	BC052334	GTGCGAAACGGAGGACCTTTGTAACGCCACGTGTTTGCTCTTTTTGAAAAAACAAGAATA
A_33_P3283515	0.4124	0.0184858	-2.57	-3.1095	-0.474	A_33_P3283515	AK128686	ACACAGAACAAAGGATGCAAGTACAGCAGCAACACAGCCAGGAGGGCAGCCCCAGAATTG
A_24_P923757	0.4124	0.018512	2.57	-3.1107	3.52e-01	A_24_P923757	NM_018179	TGAGCTGACTTCTGAATCAACCTTTGATCGTACCTTTGAACCAAAGTCTGTACCAGTTGG
A_33_P3261505	0.4124	0.0185182	2.57	-3.111	2.12e-01	A_33_P3261505	NM_020964	CTCGTTTTCTTCCCACATATCTAGTGTGACCTTTAAAAACCACAACTTTATTTTGGACAT
A_33_P3389342	0.4124	0.0185312	-2.57	-3.1115	-0.236	A_33_P3389342	NM_212481	TGCCCACCTCCAAGCCCAGGAAACAGTACAAGATGGCTAAGGAGAACAGGGGGGATGATG
A_33_P3362886	0.4128	0.0185616	2.57	-3.1129	4.98e-01	A_33_P3362886	AK056419	CTTTCCATTTATCAGGGACTACTGACGCGTGTCTCCCAATAAATACCTGAGTATAAACAA
A_23_P56505	0.4129	0.0185829	2.57	-3.1139	2.29e-01	A_23_P56505	NM_000885	ATTTCAAGTAGCTTGCTACTTGGACTTATTGTACTTCTGTTGATCTCATATGTTATGTGG
A_33_P3241204	0.4133	0.0186354	-2.57	-3.1162	-0.282	A_33_P3241204	NM_001129742	GCAAGAATCTAAGTAAATCTGCCATGGGTTCTGGGTTCTAGATGTCAATTCTAAATAATA
A_33_P3307267	0.4133	0.0186432	2.57	-3.1166	7.92e-01	A_33_P3307267	BC022258	TTTCCTCCAAAACTAACTGTGGCTAGAGTCTAATTCTAATACATCTCGAGCCTGAAGCTC
A_33_P3232861	0.4133	0.0186608	2.57	-3.1173	2.80e-01	A_33_P3232861		GACCTAGTAAGGCTTAAACCTCTAAAACTTGTGGTTTTAACAAGGCTTAATATACGTAGT
A_33_P3246715	0.4133	0.0186694	2.57	-3.1177	4.16e-01	A_33_P3246715	NR_033773	GGAGCAGTGATTGGGGCCGCAAGCCCGCCTGAAACCGGCCCGGGCGGCCCTGCGGGGAGC
A_33_P3232798	0.4133	0.0186989	2.57	-3.119	3.41e-01	A_33_P3232798	NM_025151	GCTCGGCCTCGACAAGTTCCTGGGCCGCGCCGAGGTGGACCTGCGGGATCTGCACCGCGA
A_24_P67534	0.4133	0.0187324	-2.57	-3.1205	-0.23	A_24_P67534	NM_001163438	GATTCTCAACGTCCACCTGCAGGTATATATTTAGAGCCACTAACTTTGTGGCATTTGGGG
A_23_P154108	0.4133	0.0187413	-2.57	-3.1209	-0.167	A_23_P154108	NM_001378	TAACTAGTGGATTTGGGAAAGGTTCTTAAGTAGATCCTGAGACTATTTGCATGCTTCTGT
A_32_P46840	0.4133	0.0187517	-2.57	-3.1214	-0.284	A_32_P46840	AK090664	CATCTCTTGGTCTATGACGACGATGTTGGAGAGTTCCTACTCCGTGATAACTCAGTTCTA
A_23_P341349	0.4133	0.018777	2.57	-3.1225	2.91e-01	A_23_P341349	NM_023083	ATAACTATTTATTGTTCGAATCACTTTTAGGATGTAACTTTATAAATAAACATGAGCGCT
A_24_P169386	0.4133	0.0187846	2.57	-3.1228	3.53e-01	A_24_P169386	NM_001040710	GTGGATGAAGAGAGGAGAACTGGTCTTCAGTGTGAGACAGGGAAAACGACATTCCATAAA
A_33_P3346046	0.4133	0.0187858	-2.57	-3.1229	-0.431	A_33_P3346046		AGTAACTGGCGTCGTCGTCGTCTTCCAGCTCCTCCAGATAATCGGAATCAGCCTCGTCCT
A_32_P210872	0.4133	0.0187866	-2.57	-3.1229	-0.265	A_32_P210872	NM_001037558	GTTTGATGAGCTAAAACAGTTCCTCATTTGGTCTAGTTTTCGGGCCAGGGGAGTAAGTGA
A_32_P38645	0.4133	0.0187894	-2.57	-3.123	-0.359	A_32_P38645	NM_182970	AGGTCAGAATGGAGCCGAACCCAGGGCTGTGAGCATCACCTCTGGAGCCCTTTCACTTTA
A_23_P129157	0.4133	0.0188161	2.57	-3.1242	2.57e-01	A_23_P129157	NM_024608	TAGCAGGAGGCTCTCCTTGCTTGCACTCACCCTTTCTTATTGTCTTGCCCTGCATCTGGG
A_23_P404481	0.4133	0.0188179	2.57	-3.1243	3.36e-01	A_23_P404481	NM_001400	GCTGAGGCCAAAGTTTCCATGTAAGCGGGATCCGTTTTTTGGAATTTGGTTGAAGTCACT
A_32_P153773	0.4134	0.0188562	-2.56	-3.126	-0.342	A_32_P153773	NM_000718	TTGTTTCTCACTGTGTCTTCTCCGGCTATCATATATGTCCCCTGAATCTCATAGTGAGCT
A_23_P76841	0.4134	0.0188763	-2.56	-3.1269	-0.48	A_23_P76841	NM_001042635	ACACTTCAGTGACATCAGTGCTTTGACAGGGGGAACTGTTCATCTTGATGAGGATCAGAA
A_23_P428992	0.4134	0.0188784	-2.56	-3.127	-0.193	A_23_P428992	NR_015433	ACCTACAATTGGGATGAGTTCTAGGTACATGTGTTTGCTGACTTTGGGGTAAACAACTTT
A_24_P254949	0.4134	0.0189001	-2.56	-3.1279	-0.291	A_24_P254949	NM_021965	CTAACAGCCAGCCACTGCCCTGGAGGACCAGGGGGAGAGTTTGGAGTGAAGTTTAATGTT
A_33_P3400578	0.4134	0.0189023	-2.56	-3.128	-0.504	A_33_P3400578	NM_002126	CACCATGATATTGGTGGTATTTATGCTGTTAAGTCCAAACCTTTATCTGTCTGTTATTCT
A_23_P23850	0.4134	0.0189159	2.56	-3.1286	6.70e-01	A_23_P23850	NM_021080	CTCCCTCACCTGTACCTCAGAGGCCTTCTCCAGTTACTTCAACAAAGTCGGGGTGGCACA
A_23_P200792	0.4134	0.0189226	-2.56	-3.1289	-0.334	A_23_P200792	NM_024408	GGCCCCCACTAATAAGTGGTACTATGGTTACTTCCTTGTGTACATTTCTCTTAAAAGTGA
A_33_P3231367	0.4135	0.0189426	-2.56	-3.1298	-0.231	A_33_P3231367	NM_013236	CTGATTGCTCCCAAATAAAGTGCTTCTAAGCTTTGTGTAGACATAGTTTAACTGATTTGT
A_33_P3399263	0.4137	0.0189792	-2.56	-3.1314	-0.309	A_33_P3399263	NM_001243539	GTGACTTGGGGGACCAGCAGCAGAGATGAAGACTTGGAAAACTGCTCTCACCACCTATGA
A_23_P57199	0.4137	0.0189792	-2.56	-3.1314	-0.382	A_23_P57199	NM_178311	GACGAGGAAGAGGACTTTGGGGGACAGGCTTCTCCTGTGAGCAGCAGAGCAGCACAATAA
A_23_P26336	0.4141	0.0190162	-2.56	-3.133	-0.197	A_23_P26336	NM_014153	CGGTTGCCATCTGTTGAACAGACTTTTGGATGAAGTGTGTTGGGGAAGAGGATAAGGTTA
A_23_P3186	0.4142	0.0190352	-2.56	-3.1338	-0.196	A_23_P3186	NM_001099402	GCAGCAGGGTACCTTGTATAATGCACGACAGTTGCAGTATGGGAAGAATGGACCGGGCCC
A_23_P63032	0.4145	0.0190633	-2.56	-3.135	-0.556	A_23_P63032	NM_007102	GAGGCTTCCAGCATCTTCAAGACCCTGAGGACCATCGCTAACGACGACTGTGAGCTGTGT
A_33_P3221293	0.4147	0.0191095	-2.56	-3.1371	-0.46	A_33_P3221293	NM_004403	TCTGTGCTTTAGGCAGAGAACATTCATGATGTCATATGTGAACTAGAAGTACGTGTTACT
A_23_P150255	0.4147	0.0191137	2.56	-3.1372	1.72e-01	A_23_P150255	NM_006328	GATGGTGAGCGGCACAGTCCCACTTCCCCATCTCCCCAAGTAGGTGGTGTTAGAAAACCT
A_32_P172141	0.4147	0.0191707	-2.56	-3.1397	-0.424	A_32_P172141	NM_016952	CAGGGTGCAAGTTACATTGCAATGTTCTAAACCTTTTGAAGTGTTCTTAGCAAAAGCCTT
A_23_P417383	0.4147	0.0191798	2.56	-3.1401	2.31e-01	A_23_P417383	NM_152792	TCTGTCATTTGCTTTGAAGCCCATTGTGCCTTATGCCAATAATTCAATTGCTGCAAACAC
A_23_P500741	0.4147	0.0191941	2.56	-3.1407	3.26e-01	A_23_P500741	NM_005187	TGAACCAGCCACGAACAGCCCGCCAGAGGCCTGAAGCTGAGCGTGTACGTTAATGTGAAT
A_23_P500433	0.4147	0.0191951	2.56	-3.1408	3.92e-01	A_23_P500433	NM_052813	CTGTTCTGTTTCACCATGTAACACACAATACATGCATGCATTGTATTAGTGTTAGAAAAC
A_33_P3398181	0.4147	0.0192006	-2.56	-3.141	-0.389	A_33_P3398181	XR_111781	ACTGATAAATCTTGCCTTGAAACTATTACCCATCTGAGTGATGCTCTGGGACTTTCTTTC
A_23_P35684	0.4147	0.0192201	2.56	-3.1418	4.46e-01	A_23_P35684	NM_014937	CTCGACATCTTATGTAGATGATCCACAACTTCAAAATTTAGTCTGGGCCTAGTGCAGTGG
A_33_P3266530	0.4147	0.0192269	2.56	-3.1421	2.43e-01	A_33_P3266530	NM_022156	GAAAATGCCTTTTACTCAGGGAATCTCCTGCTACTTAATGTGGAAAGACACGCCCATGTC
A_23_P149050	0.4147	0.0192354	2.55	-3.1425	3.12e-01	A_23_P149050	NR_024321	AAGTATCAAGTTTTCTTTGTGATGTTTTCTGCAAATATTGAAGGATGACCTGGATTGTCC
A_23_P400984	0.4147	0.0192398	2.55	-3.1427	2.51e-01	A_23_P400984	NM_001178000	CCTTTGCCGTTACCCAGTAACATAATATTTCACTAAACCCATTAAGATGCTTGAACTAGA
A_23_P308032	0.4147	0.0192722	-2.55	-3.1441	-0.234	A_23_P308032	NM_005387	TGGGGAGATTAGGGCCTACATTGTTTATCGCAATTACTTGTATCATTGATACGGGATTTC
A_23_P59613	0.4147	0.0192752	-2.55	-3.1442	-0.424	A_23_P59613	NM_003508	AGGATGTGGAGGGGCGGGGCAGAGGGGTCCAGCCGGAGTTTATTTAATGATGTAATTTAT
A_24_P195272	0.4147	0.0192917	-2.55	-3.1449	-0.34	A_24_P195272		ATTAGCCAGGCCACCAACACAGCCACCACGTTCTGCATCTTCTATAGCATGGTGGCCACA
A_33_P3220663	0.4147	0.0193032	2.55	-3.1454	3.21e-01	A_33_P3220663	NM_145064	GGGGGCGAGGGAGGGCGAACTGTCGAATGTTGCGAATTTATTAAACTTTTGACAAAACTT
A_23_P63896	0.4147	0.0193035	-2.55	-3.1454	-0.271	A_23_P63896	NM_000043	ATGTCTATCCACAGGCTAACCCCACTCTATGAATCAATAGAAGAAGCTATGACCTTTTGC
A_24_P104538	0.4155	0.0193774	-2.55	-3.1486	-0.217	A_24_P104538	BC000924	TGTAATGATTGTAAACGGGCACAAGAGGGCAGCAGTGAGGAATTGTACTGTATCTGCAGA
A_33_P3861634	0.4155	0.0193784	2.55	-3.1487	2.12e-01	A_33_P3861634	NR_038897	TGCAAGGGTTGGGCTGGAATTAGGACATTATAGAACAAATATTAAAGGAAAGCTTAACAG
A_23_P58529	0.4155	0.0193857	-2.55	-3.149	-0.267	A_23_P58529	NM_014473	CAAGTTCAGGAGCCGCAGAGACGCACAACTTTACACTTATCATTTCTAACAGTTTATTGT
A_24_P66001	0.4155	0.0194234	-2.55	-3.1506	-0.317	A_24_P66001	NM_001003684	CTGCTTCTACATTGGTTGCTTTGTTAACTCTACCTGATCTTCACTTGTCAGTAATTTGAG
A_23_P132644	0.4155	0.0194273	2.55	-3.1507	7.08e-01	A_23_P132644	NM_020792	TTGGTGGATCTATTTTATGCATGACCTTTTAACCTTTGACTTTGCTTATTTCCCACTACG
A_23_P155830	0.4155	0.0194294	-2.55	-3.1508	-0.35	A_23_P155830	NM_020773	CTCCAGAGGTCTGCACACTCCACTTCACATGCCGTTGACTCTCACAGTCTAAGACTTCAG
A_23_P157926	0.4155	0.0194575	-2.55	-3.152	-0.287	A_23_P157926	NM_152570	ATGTGTCAGAGCCCTTCACACAGTGGGATACTAAGTGTTTGCGTTGCAAATATTGGCGTT
A_33_P3259017	0.4155	0.0194609	2.55	-3.1522	2.44e-01	A_33_P3259017	NM_001319	TGTAAGACTTTGGCCGAAATTTCTACACCTGTGTCTAGTCCTCCCCTCCAAGAGCATTAA
A_33_P3329153	0.4155	0.0194717	2.55	-3.1526	2.06e-01	A_33_P3329153	NM_031267	GCGAACTCTTCACTAAAAAACCTATATTTCAAGCAAATCAGGAACTTGCACAACTAGAAT
A_33_P3240763	0.4183	0.0196161	-2.55	-3.1588	-1.01	A_33_P3240763	BC040838	TTTACTCTGTGAACTCGCTCCAAATTCTTTCTCGCATGAGATCAAAGAGACCTCTCTCGG
A_32_P14721	0.4187	0.0196693	-2.54	-3.161	-0.762	A_32_P14721	NM_178504	CACTGGATCAAGCGCGGGGTTGCTTTGCTTTGTCAGTTGGATGACTAAATTGGACAAATT
A_33_P3415957	0.4187	0.0196774	-2.54	-3.1614	-0.26	A_33_P3415957	NM_004492	AGGACAAAAGTTGTTGCCTTCCTAAGAACCTTCTTTAATAAACTCATTTTAAAACTCTGA
A_33_P3396370	0.4187	0.019681	2.54	-3.1615	2.74e-01	A_33_P3396370	NM_032489	GGGCCACGGTGGGAGCTGCGCCCTCCTTAAAAGATGACTTTACATAAAATGTTGATCTTC
A_23_P217379	0.4187	0.0197034	-2.54	-3.1624	-0.282	A_23_P217379	NM_033641	TGAATTGGCTATGCAGTACATTGTATTCTGTTTGGGGGAATTTGTTTTAGCCATTTTCTT
A_24_P347704	0.4187	0.0197331	-2.54	-3.1637	-0.179	A_24_P347704	NM_006565	CCAGAGTTCTATGGTCTTCTTCCCAAGAGAGTTTTTAATTGTAAATGCATACTTGGGAAG
A_33_P3246258	0.4187	0.0197527	2.54	-3.1645	5.06e-01	A_33_P3246258	AK129520	CAAACGATTTCAGGAAGATTTGCACACGGGCACATATGACCATAATCTGGTTTCTGGCAT
A_33_P3847514	0.4187	0.019759	2.54	-3.1648	2.19e-01	A_33_P3847514	NM_001145652	AATGCTATTCTGGGAGCTCCAACCTGCAATTAACCTACAGAAGGAACCTTTTGAGAGGCT
A_23_P322704	0.4187	0.0197823	2.54	-3.1658	3.80e-01	A_23_P322704	NM_001079519	CTACTTATGGTTTTACATGCTTCGGGCTGCTACATCAACTCTCTCAGTGTGTGACTTCCT
A_24_P402588	0.4187	0.0197902	2.54	-3.1661	3.23e-01	A_24_P402588	NM_018014	CCCCAACCCCTTGTTTCTATACATTCTATGTTGTCTTTTAAAAAGTGTGCTTAACATTGA
A_33_P3209279	0.4187	0.0197913	2.54	-3.1661	2.70e-01	A_33_P3209279	NM_015278	GATTCAGCTAATGATGATGGTCAAAGAAAAGATGATCACAATTGAGGAAGCACTTGCTAG
A_33_P3350488	0.4187	0.0198166	2.54	-3.1672	2.20e-01	A_33_P3350488	NM_016359	CCTCAGTGGAGCTTCTGAGTTTTATACTGCTCAAGATCGTCATAAATAAAATTTTTTCTC
A_33_P3228573	0.4187	0.0198222	2.54	-3.1674	1.78e-01	A_33_P3228573	NM_001251888	TCCGCCAGCCACAGGACCACCTCCTCTGCCAGCAGGAATAAAGACTTGTGCATCCCTCAA
A_32_P100683	0.4187	0.0198263	-2.54	-3.1676	-0.245	A_32_P100683	NM_001145418	CAGGCTGGAAAAATGCCATGCAATAATCTGGTTTGCTTTCAGTAAGTAGGCAACAAGTGA
A_23_P102462	0.4194	0.0198841	-2.54	-3.17	-0.309	A_23_P102462	NM_153214	CTTCCAGGCCAACCACGTGTCCAAGGTCACCATCTTTGTATCCCCCTATGACTTCTGAGG
A_32_P84369	0.4194	0.0198929	-2.54	-3.1704	-0.323	A_32_P84369	NM_001079529	AGACTTGATGTGGATCGTGATCATTTCGGGAAATGTGTTACTCCAAAAACTTTTATAATC
A_33_P3337540	0.4194	0.0199046	2.54	-3.1709	3.64e-01	A_33_P3337540	NM_000874	CCCTGTGCCCCAGTGATTAAGTTTTATTATGTAGAAAATAAAGAGCAAACAGTACAGCTG
A_33_P3242713	0.4198	0.0199368	2.54	-3.1722	2.59e-01	A_33_P3242713	AK022058	GCATCTCATGTCTATGTGACTACAAATATCAGGGAACAGATTCTCCATCACCAACCCCAA
A_33_P3402495	0.4204	0.0199974	-2.54	-3.1747	-0.51	A_33_P3402495		ACTAGATCTCATGAGAACTCACTCACTATCAGGAGGATGGCATTAAGGGCTTGGTGCTTT
A_33_P3270926	0.4204	0.0200015	2.54	-3.1749	1.91e-01	A_33_P3270926	XR_110088	CAAAATCCAGTGGCCAATGATGCATTTCCCCACAGAGACCCATACTAGATTTACCATCAG
A_23_P205531	0.4204	0.020013	-2.54	-3.1754	-0.372	A_23_P205531	NM_002937	GGTTAGATGCCACCATGTAGGGATTATCGCGAGTGGTTGACCTTACACTTACTCCTTAAA
A_23_P149496	0.4204	0.0200467	2.54	-3.1768	2.08e-01	A_23_P149496	NM_018053	TTTTTTGCCTTAGCCAGTGTACCTCCTACCTCAGTCTATGTGAGAGGAAGAGAATGTGTG
A_23_P388190	0.4204	0.0200543	-2.54	-3.1771	-0.224	A_23_P388190	NM_033081	AAGCTGTTCACTGTGAAACAGTCTCTTGCTTGTCGTGTATTTTTCGAGTACTTCTGAAGT
A_33_P3268618	0.4204	0.0201155	-2.53	-3.1796	-0.237	A_33_P3268618	NM_025132	CAAAGTCTTTCTTACACACTCTATCCTCTGCACTGTTAATAGTAACCTATGACATAATTG
A_23_P409168	0.4204	0.0201289	2.53	-3.1802	2.75e-01	A_23_P409168	NM_015175	TCACCTACTCCTTGCACCTGTATTCAGTCAATGGGAAGTTGCGGGCTTCACTGCCCCTGG
A_33_P3214427	0.4204	0.0201374	-2.53	-3.1805	-0.207	A_33_P3214427		TAGCACTGGAGAGGCCATCTCTTCTTGATACAATGATTTTCTCATCTTCAAGTTATATTA
A_23_P164057	0.4204	0.0201419	-2.53	-3.1807	-0.728	A_23_P164057	NM_002404	AAATTACACCTGGAGTCAGGTGCAGAAGGGAACCTTGTATTTCACAGGCCTCATTTTGAT
A_33_P3284686	0.4204	0.020193	-2.53	-3.1828	-0.459	A_33_P3284686	NM_001009955	AACTTCCTCCACTCCTTTCAGAATGACAATGATTCTCCAAGCACGACGATGAGTGTGTGA
A_23_P424269	0.4204	0.0201939	-2.53	-3.1828	-0.188	A_23_P424269	AK095025	TACCGAATCAGCATGAGTGTCCTTCCAGTTTAAAAAAGCTTTGCTTCGCTCTCCTAATGG
A_33_P3400477	0.4204	0.0202003	2.53	-3.1831	1.74e-01	A_33_P3400477	NM_001048166	TTCCTCCAAGGAAACTGAGCAGCCGTCTACCAAAGCAGTAATTATCAGTCATGAATGCAC
A_23_P144877	0.4204	0.0202069	2.53	-3.1834	2.32e-01	A_23_P144877	NM_004045	TGAAGAAAACAGGAAAGACTGTTTCCTACCTTGGCCTTGAGTAGCAGGGGCCTGGTCCCC
A_32_P42054	0.4204	0.0202142	-2.53	-3.1837	-0.567	A_32_P42054	NM_194249	GTTTTGGTTTCTGTATAGTTTTGGGTCTTTCTATGCTGGTTGTATTTATGTTAAACCCCT
A_23_P10194	0.4204	0.0202273	2.53	-3.1842	4.53e-01	A_23_P10194	NM_201575	CTGGCTGTGTAAATAGTCTCCCTATCCCACGAGGGGGCTTTGATGGCCCTGGAGATCCTA
A_33_P3365856	0.4204	0.0202341	-2.53	-3.1845	-0.239	A_33_P3365856	CD674797	AAAGTGCGGAAAGAAGCAACAGCCGCTCCACCCGGGACCAGAAAAGTGGCCAGTGCGTCC
A_33_P3320082	0.4204	0.0202406	-2.53	-3.1847	-0.224	A_33_P3320082	NM_005596	CATATCACAGTATCAGTTAAGGAGCTTGATTTGTTTTTGGCATACTACGTGCAGGAGCAA
A_33_P3356392	0.4204	0.0202425	2.53	-3.1848	2.87e-01	A_33_P3356392	NM_001161616	GGCCCGTGTCATCCGCGTCAGCATCGACAATGACCACGGGAACCTGTATCGAAGCATCTT
A_24_P414999	0.4204	0.020248	-2.53	-3.185	-0.244	A_24_P414999	NM_018407	TAATTTTCCCTACAGAGATGATGTCATGTCAGTGAATCCTACCTGTTTGGTCCTTATTAT
A_33_P3335966	0.4205	0.0202809	-2.53	-3.1864	-0.387	A_33_P3335966	NM_001018005	CTCGCAGAAGGAAGACAGATATGAGGAAGAGATCAAGGTCCTTTCCGACAAGCTGAAGGA
A_33_P3679768	0.4205	0.0202866	2.53	-3.1866	2.07e-01	A_33_P3679768	AW303581	ACAGGTGCCCCAGTTTGCTGCCAGGCTCCTAAACGTAACTCCATCCAGAATCAAACAGCA
A_23_P159125	0.4205	0.0203059	2.53	-3.1874	3.67e-01	A_23_P159125	NM_004695	ACTATCTGCCATGTGAGTTGGGCAAATTGTTGACCACCTCTGAGCCTTGAAAAAGTAGGA
A_33_P3210492	0.4205	0.0203099	2.53	-3.1876	3.34e-01	A_33_P3210492	NM_031909	ACGCTGTCGGTTAAGCTGATGAAGAACCGCGACGAGGTGCAGGCCATGATTTACGACGAC
A_23_P101013	0.4206	0.0203298	2.53	-3.1884	3.81e-01	A_23_P101013	NM_007267	CAGATCAGCAATGAGGGTGAGGACAAAATCTTCTTAATCAACAAGCTTCACTCCATCTAC
A_33_P3398316	0.421	0.0203947	-2.53	-3.191	-0.438	A_33_P3398316	NM_022122	CCTCATTTGGTTTTGATATCAACAAGGAAAAAGCACATTCAGGAGGCATAAAGATATTGT
A_23_P115805	0.421	0.0203986	-2.53	-3.1912	-0.243	A_23_P115805	NM_001143764	TTGCAGATTGAAGAAGAGAAGAACAAACAGAGACAGCTGAGGTTGGCATTCGAGGAACAG
A_23_P19084	0.421	0.0204037	-2.53	-3.1914	-0.349	A_23_P19084	NM_004499	CCAAAGTTGAACAAAAGACGAGGTTTTGTGTTTATCACCTTTAAAGAAGAAGAACCCGTG
A_33_P3232532	0.421	0.0204272	2.53	-3.1923	2.18e-01	A_33_P3232532	NM_025191	CCATATTAGCAGACTGGAATGAAGATATAGAAGCATTTGAAATGATGGAGAAGGATGAGC
A_23_P258944	0.421	0.0204375	-2.53	-3.1928	-0.261	A_23_P258944	NM_012328	ATTTCTTTCTTAGTTGTTGGCACTCTTAGGTCTTAGTATGGATTTATGTGTTTGTGTGTG
A_23_P112634	0.421	0.0204683	-2.53	-3.194	-0.275	A_23_P112634	NM_174921	GGGGTTGTCTGGGATTGTGTGAAAGAAAATTAGAACCACGCTGTATTTACATTTACCTTG
A_33_P3338335	0.421	0.0204795	2.53	-3.1945	4.28e-01	A_33_P3338335	NM_177401	TTTTAACGATTTTTAAATAACGTCTGTGCCTCCACTGGTTGAGGGTGGAACCTCCAGGCA
A_33_P3275422	0.421	0.0204802	2.53	-3.1945	2.97e-01	A_33_P3275422	NR_024096	ATTGTGGAAGCAGTGACAACTTGATGAAGCTCCCTGGGCTGGCCCCTTCCTCTCTGCCTT
A_33_P3390024	0.421	0.0204831	2.53	-3.1946	1.52e-01	A_33_P3390024	BC029432	AGGATATAGCACAGTACATCCTATAGGCATTAGGATCTCTGCTTCAAGAATTGCACATTT
A_33_P3388070	0.4212	0.0205086	-2.52	-3.1956	-0.384	A_33_P3388070	DB226000	TTATCCACAGAAGCAAAACACACCCACACTCCCAGGAAGGAGGCGGCAAAGGACAGCTGC
A_33_P3415500	0.4214	0.0205375	-2.52	-3.1968	-0.34	A_33_P3415500	AK131423	GGCGTAGTTAAGCTTTGCAGCTTCCAGTGTATTTTATTTATTCTTTTGTTGGGTTTTTGT
A_23_P52676	0.4214	0.0205455	2.52	-3.1971	2.29e-01	A_23_P52676	NM_053054	CCAGGCAGCCGTCATCGATGAGATTGTGGACACCACATTTGAGGCTGGAGAAGAGGACTT
A_33_P3216090	0.4219	0.0205916	-2.52	-3.199	-0.39	A_33_P3216090	NM_016848	CAGATGCCAAGATGCTGGAGGAACTGCAAGCCGAGACTTGGTACCAAGGAGAGATGAGCA
A_24_P527404	0.4219	0.0206087	-2.52	-3.1997	-0.21	A_24_P527404	NM_004329	ACTCTTATTAGGATACAAGCTGGGAACTTCTAAACACTTCATTCTTTATATATGGACAGC
A_33_P3267562	0.4219	0.0206144	-2.52	-3.1999	-0.289	A_33_P3267562	NM_012476	AGTGCAGTGTGAGTGTGTGTGTCTCTCACTGAAATAAAAGGAAAACAATGACAAGAAGGG
A_33_P3299872	0.4223	0.0206546	2.52	-3.2015	3.42e-01	A_33_P3299872	NM_138571	GGTATCAAGAGCATTGTTTATGCATGTTGTGATACTATTTGTGGAACTGTTTAATGAGCT
A_24_P119545	0.4223	0.0206765	2.52	-3.2024	2.32e-01	A_24_P119545	BC015009	TGTAATTTGTAATTCTTTAGTTTTCAAGAGGGACTCTACATGTTTCCTTGTGATGATGGC
A_33_P3223056	0.4223	0.0207011	2.52	-3.2034	6.57e-01	A_33_P3223056	NM_030957	CACACACTCCTGCCAGGAAGCCCTACATCAATAAAGTTCTGTCTTGTGTAGATTTCTACG
A_24_P380679	0.4223	0.0207147	2.52	-3.2039	2.49e-01	A_24_P380679	NM_182597	GAACCTGCATTAGTTCCAGCAATGAAAGTAAGACACACAGCATATGACATAAGACACAGT
A_23_P100660	0.4223	0.0207361	-2.52	-3.2048	-0.261	A_23_P100660	NM_002615	CTTCGTACTGAGGGACACAGACACAGGGGCCCTTCTCTTCATTGGCAAGATTCTGGACCC
A_23_P94921	0.4223	0.0207519	-2.52	-3.2054	-0.205	A_23_P94921	NM_006749	TTTTTTGATAGCGGGAGGGAGGAAGTACGACTAATGTTGGAGCCTGAAACTATGGAAATG
A_33_P3320062	0.4223	0.0207567	-2.52	-3.2056	-0.279	A_33_P3320062	NM_002662	AAGATACAGAGACTGTTCCTTCAGTAATGGATGGAAAAGAGTACCAAGCTGGCCGGTTTG
A_23_P157299	0.4223	0.0207671	-2.52	-3.206	-0.439	A_23_P157299	NM_001129	ACAGTAGAGACCTACACAGTGAACTTTGGGGACTTCTGAGATCAGCGTCCTACCAAGACC
A_24_P137434	0.4223	0.0207704	-2.52	-3.2061	-0.298	A_24_P137434	NM_080927	TCATGTCACATGAAACGATTCTCTGCTTTTTGGTTCTGAACTTGAAGTCCCTAAACTGCA
A_24_P375761	0.4225	0.0207946	2.52	-3.2071	3.14e-01	A_24_P375761	XR_110003	TGCTTGTGCAAGGAAGATACGGAAGCCACACAATGGGTTGGTTCTTTCTAGCCCTTCCCA
A_23_P304287	0.4225	0.0208078	-2.52	-3.2076	-0.192	A_23_P304287	NM_002803	GATCCAGCACTGATGAGGCCAGGGAGATTGGATAGAAAAATTGAATTTAGCTTGCCCGAT
A_23_P254733	0.4225	0.020852	2.52	-3.2094	3.93e-01	A_23_P254733	NM_024629	GCTGTTACCTTCTGAAACTGTACCTTTATAAATCAATTGTTTTGCAAAGAAGTTATGGCC
A_33_P3286157	0.4225	0.0208554	2.52	-3.2095	3.86e-01	A_33_P3286157	NM_003327	TTACGTATGCCATGCATACCTCCTGCCCCGCGGGACCACAATAAAAACCTTGGCAGACGG
A_33_P3238941	0.4225	0.0208811	2.52	-3.2106	1.80e-01	A_33_P3238941	NM_147195	GCACCAAGCTCTTTACGGAGAAACAGCGGATGAAATATTTTCTCAGCACTCTTCCTACAA
A_33_P3330264	0.4225	0.0208833	2.52	-3.2106	2.15e-01	A_33_P3330264	NM_001511	AAGCTTGCCTCAATCCTGCATCCCCCATAGTTAAGAAAATCATCGAAAAGATGCTGAACA
A_33_P3286002	0.4225	0.0208953	2.52	-3.2111	2.66e-01	A_33_P3286002	AK125618	TATTCCGGGGACTCGCACGTGAATTGGATGCCAAGGAATAACGGTGACCAGGAAAGGCGG
A_33_P3325349	0.4225	0.0208977	-2.52	-3.2112	-0.527	A_33_P3325349	NM_005723	AGTCGTTGCGCCGTGAATCTCTACTGTAGCCATGAATTTATGGACAGTTAGATGCTTACC
A_33_P3299421	0.4226	0.0209237	2.52	-3.2122	1.62e-01	A_33_P3299421	NM_020880	CACTTACCAGGAACTGCCTGTTAACTGGCTTGTGCAATGATAAAGGCCTTTTGTTTAAGT
A_33_P3395743	0.4226	0.0209334	2.52	-3.2126	8.05e-01	A_33_P3395743	NM_022834	CCTCGCCTCTTCCCCACTAACATCCCAGACTTTAAAATTCAGTAAATCAGATGTACACCG
A_23_P213584	0.4228	0.020955	2.51	-3.2135	3.01e-01	A_23_P213584	NM_002115	GCGGGAAGCCATCACTCGCAGACAGGCAGTGGAGCTGAATGTGGTTGCCATTGTCAATGA
A_33_P3284646	0.4234	0.0210059	2.51	-3.2155	2.88e-01	A_33_P3284646	NM_012162	CCCACCCTCCACCTTTGCCCAATTTCAGATATTTGAGCATTTTGTTAAAATAAAACATTT
A_23_P142738	0.4234	0.0210274	2.51	-3.2163	2.34e-01	A_23_P142738	NM_152390	TTTCTGGATTACTGATAGAAAATCATGCAAAACCTCCCAACCTTTCTAAGGACAAGACTA
A_33_P3375435	0.4234	0.0210303	2.51	-3.2164	2.79e-01	A_33_P3375435	NM_133447	GAAAAACAGTGGACCCAAAGATGAAAAGAAAAAGAAGCGGCATCTGCAGGATCTCCAGCT
A_33_P3216570	0.4255	0.0211507	-2.51	-3.2212	-0.487	A_33_P3216570	AJ298317	AGAAATCCAGGACAACCACTTTGGTGACAACCAGCACAACCTCCACTCCACAGACCAGTA
A_33_P3314166	0.4258	0.0211778	2.51	-3.2222	2.45e-01	A_33_P3314166	AK128388	CTGGAAGACCTCACTGTATTGTTATTAGAGTGAAAAAGGCAGTAAGTCTTAGTATGAAAA
A_32_P150142	0.4272	0.0212686	-2.51	-3.2258	-0.218	A_32_P150142	NR_026929	AGTCTCCCCAAAAGTGACCACATCACCAGGCTCAGTTCCAGGAAGGCTGAGAAGTGCCCA
A_33_P3229037	0.4272	0.0212788	2.51	-3.2262	1.90e-01	A_33_P3229037		CTTTCTTAGTGACCTTAACTTTGAAGTGTTTGTACAGTAATGATCTTTGCTGACTGATTC
A_32_P164246	0.4272	0.021296	-2.51	-3.2268	-0.493	A_32_P164246	NM_033260	CAGAGGCTCTTCAGTGATTTCTTGCTATTGACCGATGCTTCACTGTGCCAAAAGAGAAAA
A_33_P3250018	0.4272	0.0213099	2.51	-3.2274	1.93e-01	A_33_P3250018	NM_013320	GTACAGACTTGCCATACCAAGCTGCATCATCAGATTCTTCAGCAGCACCAAATATGCAAG
A_33_P3346448	0.4274	0.0213502	-2.51	-3.2289	-0.388	A_33_P3346448	NM_032968	GTGATGATTCAATTAAAGTCATTCCTTTGACAACCTTCACTCCACGCCAACAGGCCAGAC
A_23_P142776	0.4274	0.0213515	-2.51	-3.229	-0.26	A_23_P142776	NM_003754	ACAATGAGTCAGAAGATGAAGTGGCTGTTGACATGGAATTTGCTAAGAATATGTATGAAC
A_33_P3360867	0.4287	0.0214453	2.5	-3.2326	5.13e-01	A_33_P3360867		ACAATGGCCTCTTTCAAAGGCCCAGCTTTTCCTTCGTGGCGGCCTCTCCAGGCCCAAATT
A_33_P3260430	0.4287	0.0214543	-2.5	-3.233	-0.641	A_33_P3260430	NM_005988	CTTCTACCACCTTTGCAATTGTCACTTATCTTTCACTCCCTGAATAAAGTATCTATGCAT
A_24_P341674	0.4287	0.0214575	-2.5	-3.2331	-0.201	A_24_P341674	NM_013989	CAATTCCAGTGTGGTGCATGTCTCCAGTACAGAAGGAGGTGACAACAGTGGCAATGGTAC
A_23_P18465	0.429	0.0214898	-2.5	-3.2343	-0.228	A_23_P18465	NM_002913	CTTCTGAATGACTGTAGAATTGGAACTAGAAACTACACCTGGGCTTTGGAGTCAGATTTT
A_23_P324523	0.4291	0.021537	2.5	-3.2362	2.03e-01	A_23_P324523	NM_153208	AGATCCGAAAGCCTAGTAGTTAGTTGCACTGGGTTGTTTTGACAAGCTACCACACGTCTT
A_24_P854492	0.4291	0.0215549	2.5	-3.2368	3.19e-01	A_24_P854492	NR_003491	CAACAAAGGAGCGTCACTTGGATTTTTGTTTTCATCCATGAATGTAGCTGCTTCTGTGTA
A_23_P205867	0.4291	0.0215785	-2.5	-3.2377	-0.468	A_23_P205867	NM_014249	GAAAGAAGCCAGGCCGAAGTTCCATTTATGCAGAGTTCAGGAACAGGCAAGACTAATTGA
A_23_P352990	0.4291	0.0215963	-2.5	-3.2384	-0.195	A_23_P352990	NR_027246	GTTCACAGGTTCCAGGATAACCAGATGACTGAGGAATGTTGAAGATTGCAGTGATGGAAG
A_23_P384044	0.4291	0.0216147	2.5	-3.2391	2.81e-01	A_23_P384044	NM_152495	CTCCCATCTGAAACCTGTGACTCAGGTTTATGAATGGTGTTTGTGTAGCAACACATTGTG
A_33_P3391476	0.4291	0.0216178	-2.5	-3.2393	-0.262	A_33_P3391476	NM_001130042	TGTTAGCTAATGTAAATCTTAGTAAAGACTTGAGTCTTCTGTCACATGGAGGACGAGTGA
A_33_P3241661	0.4291	0.0216385	2.5	-3.24	1.95e-01	A_33_P3241661	XR_109642	CTGCTACTGTGTGTTTGCTGGTTCCAATGATACATAATTTGTGCTTTTCGTAATTAAAGT
A_33_P3252043	0.4291	0.0216509	2.5	-3.2405	1.64e-01	A_33_P3252043	NM_000918	TGACAGTTCTTCAGGCATTTCTATTTCACAATCGAATTGAACACATTGGCCAAATAAAGT
A_33_P3330991	0.4291	0.0216569	-2.5	-3.2407	-0.353	A_33_P3330991	AK128451	TCCATGCATGCATCTATTCATCCATCCATCCATCTACTCAATAAAAGTGTGAGGTCCTAG
A_33_P3348714	0.4291	0.0216626	-2.5	-3.241	-0.317	A_33_P3348714	NM_002010	ATCACATCAGCTCCACTGTTGCCAAACTTTGTCGCATGCATAATGTATGATGGAGGCTTG
A_23_P120812	0.4291	0.0216631	2.5	-3.241	2.57e-01	A_23_P120812	NM_020070	GGGGGTTTCAATCCAAGCATAACTCAGTGACGCATGTGTTTGGCAGCGGGACCCAGCTCA
A_23_P18649	0.4291	0.0216911	-2.5	-3.2421	-0.185	A_23_P18649	NM_024582	CCTTTACCATTGCAGAAAAGAACTTGTGCTTTCCCAGTGGCGTATGTGTATTGTTTCAAC
A_33_P3320403	0.4291	0.0216922	-2.5	-3.2421	-0.218	A_33_P3320403	AK130324	AGAGTGTGTGCTGGGGAAGGACCTCTGCTGGGCCTGCTGGATTGCAAAGAGCAAGTTTAA
A_33_P3314466	0.4297	0.021736	2.5	-3.2438	1.86e-01	A_33_P3314466		CAAAAGGGAGATACTCCAGCTTCAGCAACAGGTACTTATATTTTGAACCATCTTTTTAAA
A_24_P118196	0.43	0.0217664	-2.5	-3.2449	-0.349	A_24_P118196	NM_001080393	TATGAAGCAATACGGGATTTTCCCTTTCAAGACAATCTCTTTCAATCCATGTATTACCCC
A_24_P36847	0.4301	0.0217957	-2.5	-3.246	-0.229	A_24_P36847	NM_001357	ACGACAATGGAAGCGGATATAGAAGGGGAGGTTCTAGTTACAGTGGTGGAGGCTATGGCG
A_33_P3402635	0.4301	0.021803	-2.5	-3.2463	-0.271	A_33_P3402635	NM_001214	CAGTGTTCAATCCATTCTCCATCCAGCAGCTCCAGACATCTTTCCAGAACACAAACCTGA
A_33_P3228082	0.4303	0.0218249	-2.5	-3.2471	-0.548	A_33_P3228082	AK128037	CAAGAAACTCACCTGTTTAGTAGTTGTACAAAAACTAGCGGACAGTGGTCAGTTAAAAAA
A_32_P83049	0.4304	0.0218491	2.49	-3.2481	2.83e-01	A_32_P83049	NM_014971	GCGATCTCCCAGTGAGCCATCACGATGCCCTTTTCAAATAAATGTTAATGTTGTCACCAC
A_23_P137139	0.4304	0.0218602	2.49	-3.2485	2.78e-01	A_23_P137139	NM_000061	CGGAAGTCCTGATGTATAGCAAGTTCAGCAGCAAATCTGACATTTGGGCTTTTGGGGTTT
A_24_P41801	0.4319	0.0219634	-2.49	-3.2524	-0.615	A_24_P41801	NM_005577	CAATGAATCCAAGAAAACTTTTTGACTACTGTGATATCCCTCTCTGTGCATCCTCTTCAT
A_23_P89755	0.4319	0.0219662	2.49	-3.2525	2.09e-01	A_23_P89755	NM_016271	TGTGACCGTGATATAGTGAGAAAGATTCTACCAACCACTGTTTCACTACTTTTTAGTTAA
A_32_P78783	0.4322	0.0220515	2.49	-3.2557	2.03e-01	A_32_P78783	NM_001201407	GTGATATGCAGCAGCATTGTTGCTGTTCTGCTCAGTACTTTGATGATCCCTTGTGATCTC
A_24_P289208	0.4322	0.022064	-2.49	-3.2562	-0.561	A_24_P289208	NM_003226	TCCCCAAGCAAACAATCCAGAGCAGCTGTGCAAACAACGGTGCATAAATGAGGCCTCCTG
A_23_P59130	0.4322	0.022065	2.49	-3.2562	1.87e-01	A_23_P59130	NM_021221	TCAAGGTTCGCTTCATCGTTCGAGGCTGTGGACAGTACATTTCCTACCGCTGCCAAGAAA
A_24_P271149	0.4322	0.0220678	-2.49	-3.2563	-0.58	A_24_P271149	NM_001101372	TCAGCTCTGACTGTAGGAACACTCCACCCTGGTACACCACACCACACAAAGTGGGGGACA
A_23_P147665	0.4322	0.0220918	-2.49	-3.2572	-0.42	A_23_P147665	NM_198474	GCTGAAGCTCTTCCCTCTTTTTCAAATGTCTATTGATATTCTCCCATTTTCACTGCCCAA
A_23_P70688	0.4322	0.0221221	2.49	-3.2583	3.94e-01	A_23_P70688	NM_004271	CTTTTTCTCTAATTGGTCGCCTCCCACCAGACTCACCTGCTTTTCAACTTTTTAGGAGTG
A_32_P143000	0.4322	0.0221437	-2.49	-3.2591	-0.198	A_32_P143000	NM_015307	TATGGCAAGCAAGATCGCAGAAGGGGGAGCATCATCCGCAAGGACTTCAGGTCTCCCTTG
A_33_P3260106	0.4322	0.0221565	2.49	-3.2596	2.17e-01	A_33_P3260106		ACACCTGGATCCTTTCCAACTTCTTTGAGATGAAGTCTCGCTGTTGCCCAGGCTGCAGTG
A_24_P391431	0.4322	0.0221822	-2.49	-3.2606	-0.211	A_24_P391431	NM_015975	GCCAAGGATCCTCAAAACAGAAGTTTCATCTTAGGATAGTGTTTGATATATCTAAGAAAG
A_23_P114862	0.4322	0.0222133	-2.49	-3.2617	-0.558	A_23_P114862	NM_021146	AAGGAGCTTCCTTTTAAATTTTGTCTGTAGGAAATGGTTGAAAACTGAAGGTAGATGGTG
A_23_P98686	0.4322	0.0222137	2.49	-3.2617	5.06e-01	A_23_P98686	NM_025092	GTCATGCAGTTGAGGGGACTTAGTCTCAATCCCAGGCTCCTCTTGACTCTGGGCAGCTTT
A_32_P202182	0.4322	0.0222202	-2.49	-3.262	-0.415	A_32_P202182	NR_003664	ACAGAACAGAGACTAGGTTTGGTGAGATGGGACAGATTTTGGGAAAGATCATGATGAGCC
A_24_P412156	0.4322	0.0222239	2.49	-3.2621	3.87e-01	A_24_P412156	NM_000609	CATACCAATGAAAAAATGTATATGCACTTATAATTTTCCTAATAAAGTTCTGTACTCAAA
A_23_P115064	0.4322	0.0222325	-2.49	-3.2624	-0.555	A_23_P115064	NM_001878	CCCTACACCAACAAAGAGGAATGGCTGCAAGAGCCCAGATCACCCATTCCGGGTTCACTC
A_33_P3238533	0.4322	0.0222443	-2.49	-3.2629	-0.317	A_33_P3238533	NM_001105528	AAGAGAGAATAATTACTGGCGGTGTTGACAGTGACTGTTCGCTTCCCCAGATTTCCCTAT
A_33_P3290622	0.4322	0.022245	-2.49	-3.2629	-0.269	A_33_P3290622	NM_016484	TTCCCTACAATTTTCATCGCCAAAAAGAGAGGACTGTGCACTAGAGAGTTACAGCCCACA
A_23_P416894	0.4322	0.0222488	2.49	-3.263	2.94e-01	A_23_P416894	NM_017439	AAGAAGGCATACAGTGGCATAAACGATGCTCTTCCTAGTAGCTTAATAGGCCACAAGCTA
A_23_P146765	0.4322	0.0222572	-2.49	-3.2634	-0.211	A_23_P146765	NM_007218	CCTTCAGTGTGTAACCAAGCACAAAAACAGTATCAATGTTGAATCTGTGAATGGTTTTCC
A_33_P3261408	0.4322	0.0222771	2.49	-3.2641	1.47e-01	A_33_P3261408	NM_147196	ATTTGTGAATAAAGCTGATTGCCTTCTCAGAGCCAGGCCTAGAAAATGGCCTCCTGAGAT
A_23_P208389	0.4322	0.0223087	-2.49	-3.2653	-0.347	A_23_P208389	NM_021913	TGCAATTTCAAGGTTCTAACCCTATACTGTAGTATTCTTTGGGGTGCCCCTCTCCTTCTT
A_33_P3262635	0.4322	0.0223194	2.48	-3.2657	7.55e-01	A_33_P3262635	NM_177405	TAATCGGATATTTATTTCTGTGTCTACAGTCTTGCCCTGCCAGACTGTATGCCCCATGTG
A_23_P217178	0.4322	0.0223201	-2.48	-3.2657	-0.294	A_23_P217178	NM_005462	ACAAAAACACACCCAAACACACCACATTGGGAAAACCTTCTGCCTCATTTTGTGATGTGT
A_33_P3219121	0.4322	0.0223333	-2.48	-3.2662	-0.736	A_33_P3219121	AK131379	ATAGAAAGCCTGATCACATAAACACACACAGACACACATACACACAAAACATACCATCTT
A_23_P134204	0.4327	0.0223858	-2.48	-3.2681	-0.695	A_23_P134204	NM_032599	AGACTTGGTAGACGAGATAAGGAGGACAAGAGAAGGGACACACCCCTGAGAGATGCTCAC
A_33_P3415340	0.4327	0.0223884	2.48	-3.2682	1.49e-01	A_33_P3415340	AK090992	GCTGTACCCAAGTGAAGATCTTTACTCAGTTACCCTTATATTTGGCTATATGGAATAAAA
A_24_P355967	0.4327	0.0224059	-2.48	-3.2689	-0.256	A_24_P355967	NM_000621	AGCAGGTGACTTTCCTATGACACTCATCAGGTAAACTGATGCTTTCAGATCCATCGGTTT
A_23_P403955	0.4327	0.0224189	2.48	-3.2693	3.58e-01	A_23_P403955	NM_007375	TCCCTTCTTTACACTTGTGTAAATTTCAGTTACTGGTCATAGAAGGCTTTCAATGTTGAG
A_24_P135579	0.4328	0.0224826	-2.48	-3.2717	-0.261	A_24_P135579		TGTCTGTTAGTAGTACAAAATACATTCCTGAGGGAGAGATTTTGGTTATAACTTATGGAC
A_33_P3224946	0.4328	0.0224836	-2.48	-3.2717	-0.598	A_33_P3224946	XR_108603	GGGAATGAGAATGTTTTAGGAGGAACTCCAGAATAGGAGAATACTAAAAATGGCAGGGGC
A_23_P130376	0.4328	0.0225024	-2.48	-3.2724	-0.372	A_23_P130376	NM_022068	TCTCGCATTCTGATTGATCATGTGAAGGAATCATTTATGGGCCCCGTCCCTAAGAGAAAC
A_23_P159237	0.4328	0.0225101	-2.48	-3.2727	-0.458	A_23_P159237	NM_005293	ACTGAAAACTCACAGGGGTAGCCGGGAGCTGCTCCTCACTTTGGCCAGTTTGTCTCCAGA
A_33_P3219965	0.4328	0.0225106	2.48	-3.2727	3.07e-01	A_33_P3219965	NM_006019	TTCTACTCAGGCACGGGCTACAAGCTGAGTCCCTTCACCTTCGCTGCCACAGATGACTAG
A_23_P56559	0.4328	0.022512	2.48	-3.2728	9.19e-01	A_23_P56559	NM_005771	ACTCATTTAGATCGTGCTTATTTGGATTGCAAAAGGGAGTCCCACCATCGCTGGTGGTAT
A_24_P115971	0.4342	0.0226021	-2.48	-3.2761	-0.342	A_24_P115971	NM_021932	AGCACGAGGCCATGAAGCTGGTGACCATGTTTGACAAGCTCTCCAGGAACAGAGTCATCC
A_23_P78458	0.4343	0.0226236	-2.48	-3.2769	-0.198	A_23_P78458	NM_021632	CCAGTGTGGAGGATTAATTGAAAACCAGGACCATAAACTTTCAGAACTTTGTATTATGCA
A_33_P3353030	0.4347	0.0226579	2.48	-3.2781	3.21e-01	A_33_P3353030	NM_003353	CAGAGCCACCAGGGCACTGTCTGCGTGACTATTTTTTAATAAAAGTACTGAAGACCCGTT
A_24_P314597	0.4349	0.0226881	2.48	-3.2792	3.20e-01	A_24_P314597	AB058740	GGACAGGTTCACCTTCCCACAGAGTAAGGGGTGAGTGACCCAAGGCTCAATGGATGAGCA
A_33_P3395008	0.4349	0.0227248	-2.48	-3.2805	-0.728	A_33_P3395008	NM_001142807	TGCTGTTAGCGGTGACTCACATTCCCAGTGATTTAGAAAAACTGTGGTGCCGAGTGAAAG
A_33_P3318668	0.4349	0.0227268	2.48	-3.2806	1.80e-01	A_33_P3318668	NM_199001	GAGAGGGACACCCCTGATTACCTTAAGGCCCAGGCAATAAAGCAGGGTGATCTTCCTCCC
A_33_P3268629	0.4349	0.0227289	2.48	-3.2807	3.92e-01	A_33_P3268629	NR_026999	GCGACCTCTGCAGGCCCAAGTCGTCCTGAAGTCAGCGTCTCCCGGCCCTGCCTCCCAGCA
A_23_P81212	0.4349	0.0227511	-2.48	-3.2815	-0.236	A_23_P81212	NM_016067	ATGGGGTTTATGCCAGTTACATACAAGGATCCTGCATATCTCAAGGACCCTAAAGTTTGT
A_33_P3268564	0.4349	0.0227895	2.47	-3.2829	2.69e-01	A_33_P3268564	NM_001004722	GTGGAGCGGAAGAACAGCCTGAAGAAGGGCTCCCTCGTGAAGAACCTGAAGGACACACTA
A_23_P4922	0.4349	0.0228051	2.47	-3.2835	3.31e-01	A_23_P4922	BC043386	GAGAGTCTCCAGCAGGGGAGGGGAATTGTTTGGACTATTGTTCTTCAGGATTGGAATAAA
A_33_P3226985	0.4349	0.0228057	2.47	-3.2835	2.45e-01	A_33_P3226985	NM_003885	CTGACAAAGTCATGAAGCTCAGTTTGGCTGTAATTTAATTCCCCTTCCCTTATTTTTATT
A_23_P35970	0.4349	0.0228175	2.47	-3.2839	2.00e-01	A_23_P35970	NM_001467	TGGAAGTTATCAGTGGCTAGTGAGGTCCCAGCTCCCTGATCCTATGCTCTATTTAAAAGA
A_23_P169117	0.4349	0.02285	-2.47	-3.2851	-0.167	A_23_P169117	NM_006570	GGTTCGTGTGTGTTCTCATTACCTGGTTATGATAGATATGCACATCAAAGCCTTTACCAG
A_33_P3334625	0.4349	0.0228633	2.47	-3.2856	1.90e-01	A_33_P3334625	AK123321	GGCTCAACGTCATAGAGATGCTGGAGAAATGCCAATCAACAGAACCTCTGCAAATCTATT
A_23_P167401	0.4349	0.0228814	-2.47	-3.2862	-0.234	A_23_P167401	NM_018931	GACCCTTTCCCAGAGCTACCAGTACGAGGTGTGTCTGACGGGAGGTTCCGAGACAAATGA
A_24_P122524	0.4349	0.0228931	-2.47	-3.2866	-0.213	A_24_P122524	NM_006784	TGGCAGATGATTTGTCATTTATTTATATTAGGTTTTACTGCCTATTGAGACAACCAGGTG
A_24_P355267	0.4349	0.0228965	-2.47	-3.2868	-0.411	A_24_P355267	NM_001006641	CTGGAGTCGTCAAAAAGCAAATTAAGAAAGAATTGGACGTTAGAAGTTGTCATTTAAAGC
A_33_P3248265	0.4349	0.0228985	2.47	-3.2868	6.83e-01	A_33_P3248265	NM_002341	GGAAATTGATTTTGAACCTGATGAAAATAAAGAATGGAAAGCTTCAGTGCTGCCGATAAA
A_33_P3322784	0.4349	0.0229152	-2.47	-3.2874	-0.43	A_33_P3322784	NM_001018065	TTGTGATGTAGTTGATCATTCAGAGCCAAACGCATATACCAATAAAGACAAGACTGTCAT
A_24_P4661	0.4364	0.0230138	-2.47	-3.291	-0.287	A_24_P4661	NM_004879	TATTCTCCTTGGTGGTCTTCTTAAGCAACAGACTCTTCCACAAGACAGTCTACCTGCAGT
A_32_P411592	0.4364	0.0230242	2.47	-3.2914	2.15e-01	A_32_P411592	NM_052897	ACATAGCCTCATTTCAAGGTGTAGCCAGGTTCCCCCGACTTTCCTCTGGGATATAAAAAA
A_23_P150876	0.4364	0.0230476	2.47	-3.2922	2.64e-01	A_23_P150876	NM_024667	AGGACGATTCACTGCCATGCCAGTCAGGCGGGCTTGCCATGTTCTGTGAATCTCGAGTGA
A_23_P6802	0.4364	0.0231025	-2.47	-3.2942	-0.194	A_23_P6802	NM_004704	CCGATGGTGGAGAATCAAAGAGGCTCGGAATTCTGTCTGCATCATCCCACTCCGCAGGGT
A_33_P3373446	0.4364	0.0231043	-2.47	-3.2942	-0.384	A_33_P3373446	XM_003118893	ATGGAACTGGCTTCGGCTGTGGGTATGGCTGTGGTTATGGAACTGGCTATGGCTGTGGAT
A_32_P24585	0.4364	0.0231213	-2.47	-3.2948	-0.333	A_32_P24585	NM_001017995	ACCTTGATTACAACCCACATTTCCTGCTTTGGGGAGCTTCCAAGTAACAGGCCATTTCTT
A_33_P3230788	0.4364	0.023122	2.47	-3.2949	3.45e-01	A_33_P3230788		ACCCAGTTTGTGGCTTCTGCCCTCCAGCTAAGATCGTTCCTTAGCTGTCCCCAAATATGA
A_23_P216402	0.4364	0.0231384	-2.47	-3.2954	-0.26	A_23_P216402	NM_031432	GGAGGCTTCTGTGAGGAATGTGAGGCACATTATTGGGGAAATTGAGGAGACAGCCTAGAC
A_33_P3274691	0.4364	0.0231445	2.47	-3.2957	5.83e-01	A_33_P3274691	NR_002934	GCGCCATGTGCAGCAATGCCCTGAAGGACCTCTCCTTGTCCATCATCTGCAAGCAGCTGG
A_24_P180680	0.4364	0.0231508	-2.47	-3.2959	-0.24	A_24_P180680	NM_018407	TTTTCCCTGCAAGCTACATCCTACTGCTTTGAACTTCCAAGTATGTCTAGTCACCTTTTA
A_23_P25176	0.4364	0.0231663	2.47	-3.2964	1.64e-01	A_23_P25176	NM_080718	GGCATGGAGGGAATCAAAGTGTTTCTCCATGAAAGAGAACTGTGGCTAAAATTCCACGAA
A_24_P11061	0.4364	0.0231766	-2.47	-3.2968	-0.248	A_24_P11061	NM_153478	ACTATCCAGCCACTCTGACCAGCCGAACCAGGAACTCAATCAAAATGCGCCACAGCAGGA
A_33_P3311770	0.4365	0.023201	2.47	-3.2977	2.94e-01	A_33_P3311770	NM_213603	GGAGAACTAGAACTTATAAACCTCTACTTCAAGTGTGTATCACGTAATTGTTTCCATGAA
A_23_P326893	0.4365	0.0232147	-2.47	-3.2982	-0.25	A_23_P326893	NM_145045	AGGACAACGAGGTAGTGACCCGCGCATCACTCAAGATCCGTTCCCAGAAATTAATCGAAA
A_23_P111981	0.4367	0.0232403	2.47	-3.2991	3.30e-01	A_23_P111981	NM_177457	TCAGCTGGTCGTGGGCATAAGTGCCCGCTGAATGGATGGCATCTCTCCCTCCTGTCTTAT
A_23_P137470	0.4372	0.0232824	2.46	-3.3006	1.58e-01	A_23_P137470	NM_020808	GGGCTTACCTCAAGAGGGAAGATAGTTGAGTTTTATTTCCTGTATATCAGGTGACCTGGT
A_23_P406341	0.4375	0.0233139	-2.46	-3.3017	-0.328	A_23_P406341	NM_001001936	AAGCTGAAGCACTAATCCCACTAAGTTAAAGACTTCTTTCCAGTCCAAGGCAGGCCTGAA
A_23_P160466	0.438	0.0233717	-2.46	-3.3037	-0.318	A_23_P160466	NM_006996	CTTGGTATGTGGCCATATTTATAGAATGCTGAACTCAATGTGCAAGTTGTACTGTATGCA
A_23_P2998	0.438	0.0233731	-2.46	-3.3038	-0.274	A_23_P2998	NM_005015	TAGGTGCTGAGACAGGTGTGCAAAGTTCTGACCTTCAGTGGATGAGAAATGTCATCAGAA
A_23_P230	0.438	0.0233864	-2.46	-3.3043	-0.215	A_23_P230	NM_004623	CTGACACCAGCATTTTTGGTCTGTGTAGGATCCTCTCCTTTTTGCAAGAATTTTCTCCGG
A_24_P32085	0.438	0.0233986	-2.46	-3.3047	-0.361	A_24_P32085	NM_024761	ATCTTCCTGACTTCTTACCTTTAACATCCCTGTTAAAGATTACACTGTTGTTGTTTCAGA
A_33_P3316522	0.4383	0.0234434	2.46	-3.3063	3.39e-01	A_33_P3316522	NM_001037500	CTGTGCTGTCTCTCCTATGCATTGAAACCTCCACCGGTCCCCAAGCATGAATATGAGTAG
A_24_P734953	0.4383	0.0234604	-2.46	-3.3069	-0.205	A_24_P734953	NM_001013642	GGAGAACTGGCTGATGCTCTGAATTTCTTCATATACCCCACATTTGACTTTGGCTTACAC
A_23_P412427	0.4383	0.0234622	2.46	-3.3069	3.39e-01	A_23_P412427	XR_109071	GACTCACAGTGTGGGAGGGTCACAGGACATGTCATCAGCAGTGAAAAGGTTTTGTTCCGT
A_23_P501961	0.4385	0.0234885	2.46	-3.3079	3.13e-01	A_23_P501961	NM_032107	TTTGCTTGCCAAACTTAGCTTTGCCAGTGATAGTCAATATTAAAGTGTACTTTTTTCCCC
A_33_P3246927	0.4389	0.0235453	-2.46	-3.3098	-0.186	A_33_P3246927	AK122603	TAAAAGAGACCCACAGAATCACCACACTGAAGCCTTCTCAGTGGAAAGAGCTAAGAAGCA
A_24_P254177	0.4389	0.0235599	-2.46	-3.3104	-0.201	A_24_P254177	NM_024104	TTCAAAGATAGTTTCACTTTGGTCTCTGAATTGAAATGCTGTCTACTGAAAGGGTTTCAG
A_23_P31858	0.4389	0.0235727	-2.46	-3.3108	-0.537	A_23_P31858	NM_014682	TCAACAGTAATTCCACTCCCATGAAACTTTGGTCATTGTTATGCATTAAGTGGGGCTTAT
A_23_P21485	0.4389	0.0235735	-2.46	-3.3108	-0.454	A_23_P21485	NM_017933	TGCTCCTTCCTAAAAGTCTGTTTTCAATCCTGGTAATATTAGGGGCACTGCGGCACCTAA
A_23_P215060	0.4389	0.0235873	2.46	-3.3113	3.31e-01	A_23_P215060	NM_001018111	CAGGAACTGGGGGATCATATATGTCTTAGTGGACAGGGGTCTGAAGTACACTGGAATTTA
A_33_P3362239	0.4391	0.0236273	-2.46	-3.3127	-0.504	A_33_P3362239		ATCCATCCATCCATCCATACATCAATCCATACATCAATCCACCCATCCATCACTCCCTCC
A_23_P56703	0.4391	0.0236317	-2.46	-3.3129	-0.552	A_23_P56703	NM_001080824	GACCCCTCGGACTTGAAGAATGGCCATTCCTGTACTCCACATTCTGGTCTAGCCTTGTTG
A_23_P256158	0.4391	0.0236405	2.46	-3.3132	3.33e-01	A_23_P256158	NM_000683	TAGTCGGGGGGTGGCTGCCAGGGGGCAAGGAGAAAGCACCGACAATCTTTGATTACTGAA
A_24_P365515	0.4396	0.0236848	-2.46	-3.3147	-0.229	A_24_P365515	NM_021784	TCCGGTTTCCACTACTGTGTAGACTCCTGCTTCTTCAAGCACCTGCAGATTCTGATTTTT
A_23_P145555	0.4397	0.0237047	-2.46	-3.3154	-0.321	A_23_P145555	NM_138569	CACTGTTCTAGCCTTTAATGCCTTCTACTTAATATTAAGCTGACCGCAATACTAACGTGC
A_33_P3327986	0.4398	0.0237349	-2.46	-3.3165	-0.471	A_33_P3327986		GGTGACAGAGCAAGACCCTGTCTCAAAGAACAAAACAACAATAACCATTTACAGACAGAA
A_24_P24444	0.4398	0.0237608	2.46	-3.3174	1.39e-01	A_24_P24444	NM_005107	ATAATTCTGGATATTGGAACAGAATAGAAATGTACTGTCGAGAGCTGACAGAAAGGTTTG
A_33_P3322236	0.4398	0.0237705	2.45	-3.3177	5.04e-01	A_33_P3322236	AK125217	GCCACTGCCAGAAAAACGTTTCCTAAGACAAGGCAGGTCTTACATTATATTTAAATTTTT
A_33_P3345886	0.4398	0.0238304	2.45	-3.3198	2.49e-01	A_33_P3345886	AK131079	TTTACCTGCATTCTTATCATCATTTTCCACGACCCTGAGACCCAGAGCTAGGAAATGGTC
A_33_P3233645	0.4398	0.0238306	2.45	-3.3198	4.74e-01	A_33_P3233645	NM_005950	CCCGTAAAATCTAGGATTTTTTGTTTTTTGCTACAATCTTGACCCCTTTGCTACATTCCC
A_23_P316850	0.4398	0.0238321	2.45	-3.3198	5.75e-01	A_23_P316850	NM_182577	GAGGCCTGTGCCTTTCCCACTCCACCTTCTACAGTTGCTTAGCCAATAAACCTTTCCTGG
A_23_P44244	0.4398	0.0238391	-2.45	-3.3201	-0.188	A_23_P44244	NM_003069	ACTTCTTTGTTGCTTTCTTTTCTATTGAGTCTGGGCTTGTTTGTGTTACTGCATACTGTG
A_33_P3280147	0.4398	0.023848	-2.45	-3.3204	-0.781	A_33_P3280147	NR_028337	GGGGAACAGGACTCAGGGTGGACTTCAAGTATCATTAAACATAATCAAATATTTAAAAAG
A_33_P3287636	0.4398	0.0238509	-2.45	-3.3205	-0.437	A_33_P3287636	X58736	TAAATCATCAGGACGTAGTACTTTATACATTGCAGCTTCTCAGCCTGGTGACTCAGCCAC
A_23_P217151	0.4401	0.0238805	2.45	-3.3215	2.14e-01	A_23_P217151	NM_017776	CACATTTAAAAAGCTCTCAGATATCATTTCGCCTTCGGTTGATGTAAGAAAATTCAAAGC
A_24_P295999	0.4407	0.0239276	2.45	-3.3231	2.90e-01	A_24_P295999	NM_000616	GTGCCCACTCTCCACCCCTGCTCCCCTGAGCTGAAATAAAAATACAATAAACTTACTATA
A_33_P3346498	0.4412	0.0239788	2.45	-3.3249	2.09e-01	A_33_P3346498	NM_130831	CTTAGTGAATATAAATGGATTGTGCCTGACATTGTGTGGGAAATTGATGAGTATATCGAT
A_33_P3217534	0.4412	0.023987	2.45	-3.3252	1.85e-01	A_33_P3217534	NM_053043	AGTGAGTCCTAACAAGAGAGCCTGACCTTAGGCTGTACACACACTGTGGAATTTCTTCAA
A_33_P3380161	0.4418	0.0240555	2.45	-3.3275	4.30e-01	A_33_P3380161	NR_026778	CTGTTGGAAGAGACAAAATGTGACTTGGTTCATAATAAAGCAAGAATTATTTACTCTCGG
A_33_P3862375	0.4418	0.0240607	2.45	-3.3277	1.80e-01	A_33_P3862375	NM_001080481	GCTGTGAAATGTATCAACCCTCATCTAATTTTTGTAGTACAAAATGACATCCTGATTCCT
A_23_P37994	0.4418	0.0240822	-2.45	-3.3285	-0.709	A_23_P37994	NM_016212	CTTTCCTAAATTGCAATATGGCCTTGGTATGGTTTTATTTGTACTTTGGTGGGGGATTCG
A_33_P3281191	0.4418	0.0240834	-2.45	-3.3285	-0.4	A_33_P3281191	NM_002508	CAGATTTGTACAAGTATTGGATGATTCCTTGAGTTTACAGCTGTACAAATAGTGTGGAAA
A_23_P218111	0.4418	0.0241218	2.45	-3.3298	3.90e-01	A_23_P218111	NM_001002236	TGATTGAACAAAATACCAAGTCTCCCCTCTTCATGGGAAAAGTGGTGAATCCCACCCAAA
A_32_P94001	0.4418	0.0241264	-2.45	-3.33	-0.245	A_32_P94001	NR_003612	AAGGAACAGGTCAGCGAAACCCACCTCATCTGATCGACATGTTATTGTATCCTTTGAATT
A_24_P358425	0.4418	0.0241385	2.45	-3.3304	3.96e-01	A_24_P358425	NM_174931	AGACGTAACATTGGGTTGAAGAATGCACTAGGCTATGAAAACAAAGGGTTTGCCTTGCTC
A_33_P3792328	0.4418	0.0241472	2.45	-3.3307	1.68e-01	A_33_P3792328	AK092130	CAGCTGTGTTCAATGTAGAAAATTAATAAAAGTTCCAGGAGTCATCCTGGCTAGATCAAG
A_33_P3334305	0.4422	0.0241841	-2.45	-3.3319	-0.79	A_33_P3334305	NM_003226	GCTGCTTTGACTCCAGGATCCCTGGAGTGCCTTGGTGTTTCAAGCCCCTGCAGGAAGCAG
A_33_P3209162	0.4425	0.0242121	-2.45	-3.3329	-0.448	A_33_P3209162	NM_001646	TCGAATCCAAAGACAGCCTCTTGAAGAAGACCCACAGCCTGTGCCCCAGGCTTGTCTGTG
A_33_P3406706	0.4426	0.024235	2.45	-3.3337	2.98e-01	A_33_P3406706	NM_005107	TTAGTGACCAGATACTGCCAAATTGATGTGTTCTTGCTTTCCAGGTGAGCTTTTTGTTCT
A_23_P108082	0.443	0.0242711	-2.44	-3.3349	-0.42	A_23_P108082	NM_032607	AGCAGACACACATACAGCCTGAAACAGACCTGGACAGACAGACACAGCCTGAAACAGACC
A_33_P3288774	0.4436	0.0243211	2.44	-3.3366	2.36e-01	A_33_P3288774	NM_172071	CCCAGAGATCAGGAGTTACTCCCAGTTCTGCTCCTTAAAATATGAGGAGTCCTACTTTTA
A_23_P30972	0.4438	0.0243501	2.44	-3.3376	3.30e-01	A_23_P30972	NM_022091	GAATAATAGATGGCTTTACCTCGTCTCACAGGAGCCTTGCGTTCCTTTTCAAATGTCACC
A_23_P148600	0.4456	0.0244638	2.44	-3.3414	2.33e-01	A_23_P148600	NR_024616	AATCCTGGGTGCTGTTACCTGAAAAAATAGCAGGTGTTAGACGAAAGAACAGATGTCTGG
A_24_P375322	0.4461	0.0245075	-2.44	-3.3429	-0.583	A_24_P375322	NR_003503	ATTAGCGTGTCAACCTTTACCACTGAGGCTGGAAATTGGCATGCCAATACCCTGTCTGTC
A_33_P3323368	0.4469	0.0245669	2.44	-3.3449	1.88e-01	A_33_P3323368	NR_033904	CAACTGTAAAATGGGGGTTCTAGAGTTGTTGTGAAGATTAAATGAGCTAATACACACAAA
A_33_P3263432	0.4472	0.0245994	2.44	-3.346	3.21e-01	A_33_P3263432	NM_003637	TTCCCAGTGGGGTGGACAGTATATCAGATGGTCAGAACAAATAAAGTTCAGTGTCAAATG
A_24_P807031	0.4474	0.0246244	2.44	-3.3468	3.82e-01	A_24_P807031	NM_001017971	GGGCTGAATGCTATAAACTGAGAAGCCAACAGATCAGCAAAATCTATGTTTAGCAGCACA
A_23_P254917	0.448	0.0246774	2.44	-3.3486	2.17e-01	A_23_P254917	NM_006149	AGGGCTATGTGCCTCCCACAGGCAAGAGCTTTGCTATCAACTTCAAGGTGGGCTCCTCAG
A_23_P83110	0.448	0.024687	-2.44	-3.3489	-0.334	A_23_P83110	NM_018249	TTTTGCAGCTGAGCAAGCGCCAGGAAAAAGTCATCTTTGATCAATTGGTCGTAACCCACA
A_33_P3366224	0.4485	0.0247288	-2.44	-3.3503	-0.168	A_33_P3366224		CGATCATATTAGTTTGAAGGTGGCGGGGCAGGATAGTTCTGTGGTGCAGTTTGATTAAAA
A_23_P401547	0.4489	0.0247776	-2.44	-3.3519	-0.193	A_23_P401547	NM_015480	ACATTCCACCATCAGATATGCAAAAAGAATCACAAATAGATGTTCTTCAACAAGATGAGC
A_33_P3298473	0.4489	0.0247948	-2.43	-3.3525	-0.188	A_33_P3298473	AF514420	GGAAACAGCACATAGTTGGGTTTTGGTTTGGTTTGATTCTGTCTAACAATTCTTGTCTTT
A_23_P75973	0.4489	0.0248226	-2.43	-3.3534	-0.161	A_23_P75973	NM_018320	TGTGTGTACGTGAGGCAGAAGAATATGACAGATGTCAGCTTCTCCCTGTGTCAGATGATA
A_23_P258570	0.4489	0.0248421	-2.43	-3.3541	-0.146	A_23_P258570	NM_002814	GGTTAAACAGCTTGGATTTATTCTTACTTTGTATGTTGTGTTGTTGTCCCCAGTGTCCTA
A_23_P320242	0.4489	0.0248511	-2.43	-3.3544	-0.312	A_23_P320242	NM_152748	AAGCAAATGATTTGGGTCTCAACTGAAGATGAAGCTCAACTCAGGAAGAGATTTATCTGT
A_33_P3398548	0.4489	0.0248517	2.43	-3.3544	2.09e-01	A_33_P3398548	NM_003666	GTGATGAAAATGTAACTTGAAACCGCTCCATTTCTACAATGCACATTTACTGTTTCTGTT
A_33_P3671506	0.4489	0.0248642	-2.43	-3.3548	-0.373	A_33_P3671506	AK021734	GTCACCTGCACTCATCTTGGGTTTTCCTTCCTTTTCCACCCTAAGCTGAAGGTATTTTTT
A_24_P228026	0.4489	0.0248796	-2.43	-3.3553	-0.244	A_24_P228026	NM_144611	GACAACCCTCCACACAGAAATCGTGGGGACCTGGACCACCCAAACTTGGCAGAGTACACA
A_33_P3401317	0.449	0.0248989	-2.43	-3.356	-0.375	A_33_P3401317	NM_001145442	TACTCATTTCCAAAAAGGAAGGCAAGTTTTCCTGCTTCCATGACGATGGAGAGCAGGCAT
A_33_P3305790	0.4494	0.0249402	2.43	-3.3573	4.19e-01	A_33_P3305790	NM_000603	ACCCCAGGGCCTACTGCCACCCGCTTCCTGTTTCTTAGTCGAATGTTAGATTCCTCTTGC
A_24_P144377	0.4494	0.0249671	-2.43	-3.3582	-0.216	A_24_P144377	NM_014015	GAGTGTCGTGCCTACTTAATTCTGATAAACCTGTTTAAGCAATACTTAGGAGGCTGACTT
A_24_P849801	0.4494	0.0249721	-2.43	-3.3584	-0.264	A_24_P849801	NM_000983	ACGTGTAAGTAATGTTTCTACAGGTCTTTGCAACAAACTGTCACTTTCGTCTCCAGCAGA
A_33_P3333960	0.4494	0.0249845	2.43	-3.3588	2.30e-01	A_33_P3333960	NR_024464	GCTGCCTGTTTTTGTTTAACCCGTGAGCTAAGAATAGTTTTTACCTATTTTAAGTAGTTG
A_33_P3380472	0.4497	0.0250188	2.43	-3.3599	3.82e-01	A_33_P3380472	NM_032554	TTAATTTATACTCTCTCAAATGCCCAGGATACTCTACCCACTTAAGAACCTTGCCAACTT
A_23_P83134	0.4498	0.0250383	-2.43	-3.3606	-0.527	A_23_P83134	NM_002048	GGATTAAGGGTCCAAAAATGCTGATCTAAGGGGTTGCCATGGTGTTGAACAATGCAACTT
A_24_P319113	0.4498	0.0250603	2.43	-3.3613	1.51e-01	A_24_P319113	NM_002562	TGTTGAGAAACGGACTCTGATAAAAGTCTTCGGGATCCGTTTCGACATCCTGGTTTTTGG
A_33_P3410806	0.4498	0.0250758	-2.43	-3.3618	-0.363	A_33_P3410806	NM_182848	GTAAGAAACTGTCCGATATGAATCACAACGTGGGTGAATGTAGTATTTTCCTGAAGTGTG
A_32_P144220	0.4498	0.0250939	-2.43	-3.3624	-0.202	A_32_P144220		CCCTCAGTGCACAATATCCAATGTGTTTGCCATGTTTGACCAGTCACAGATTCAGGAGTT
A_33_P3222203	0.4498	0.0251036	2.43	-3.3627	3.52e-01	A_33_P3222203	NM_148962	GCTGCATGTTCTGTGCTCTCCAGTTTGTCCCTTCCAATATTAATAAACTTCCCTTTTAAA
A_23_P101351	0.4498	0.0251184	2.43	-3.3632	3.15e-01	A_23_P101351	NM_024106	AATAAATGTGGGAAAGCTCTCATTTGTTCCAGTTCACTTTAAAGACATGAATGAACTCAC
A_33_P3222069	0.4499	0.025142	2.43	-3.364	2.96e-01	A_33_P3222069	NM_182965	ATGTAAGGCCTTCTAGTTTGTTCTGAGACCCCCACCCCACGAACCAAATCCAAATAAAGT
A_23_P502957	0.4499	0.0251551	-2.43	-3.3644	-0.323	A_23_P502957	NM_021810	GAGTTGCAACCTGATTTGCTGGACTCTTTGGGTTCAAAAGCGACTCCGTTTGAGGAAATA
A_23_P301877	0.4501	0.0251928	-2.43	-3.3656	-0.237	A_23_P301877	NM_004269	TGGCCTTTTAAATCAGCAGTCATTGAAGCGTTCCGCTAATCAGATGGGAGTATCTGCCAA
A_33_P3349469	0.4501	0.0251982	2.43	-3.3658	1.97e-01	A_33_P3349469	NM_018188	ACTGTCAGCTGGCCGGTCCAAGCCTGTGGCTGGAGCTGGGGTCTGTTTACCTAATAAAGT
A_23_P368154	0.4506	0.0252648	-2.43	-3.368	-0.346	A_23_P368154	NM_153703	CTGCAGGTCTTGGACATTGAAGGCAACTTAGAGTTTGGTGACATTTCCAAGGACCGTGGC
A_33_P3800734	0.4506	0.0252664	-2.43	-3.368	-0.314	A_33_P3800734	NM_001036	CATTAGTTGTGATCTTCCGTCTTACTTTATGAAACTGCACTTGAAGGTTATTCATACAAG
A_33_P3221129	0.4506	0.0253292	-2.42	-3.3701	-0.714	A_33_P3221129	NM_203422	CCCTTTTACCCTCCATTTGTGTTTATTGCATATCCACTATAACAACATTAAAGGACCTTT
A_23_P140614	0.4506	0.025344	2.42	-3.3706	3.39e-01	A_23_P140614	NR_038843	AGGCAGACCTGAGTGAGCTGGTGAAAAAACAAGAACTTCGCTTCATTCAATACTGGCAAG
A_33_P3237775	0.4506	0.025348	2.42	-3.3707	3.63e-01	A_33_P3237775	NM_005693	TCTGAGATCTGGGATGTGCACGAATGACTGTTCTGTCCCCATATTTTCTGTTTTCTTGGC
A_23_P303803	0.4506	0.0253535	2.42	-3.3709	2.68e-01	A_23_P303803	NM_152474	CAGCTCGAGTCACTTTATAAGAACCTCAGGATACCGTTATTAGGAGATGAAGAAGAGGGC
A_23_P332326	0.4506	0.0253643	2.42	-3.3712	2.99e-01	A_23_P332326	NM_153213	CAAGGCCAAGGGTAGTTTCTTCCTCTGACATGGGGACCATAACAGGTGATCACTGATACC
A_23_P252403	0.4506	0.0253771	-2.42	-3.3716	-0.213	A_23_P252403	NM_016144	GCGTCCATGGATACAAGATAAGATGTGTACCTTAGTAGAATACAGAGCTTTGGTAATTAC
A_32_P76156	0.4506	0.0253776	-2.42	-3.3717	-0.177	A_32_P76156	NM_152682	CTCAACCTGAGCATCTTTTTAATCATATACATGGGAGTCTTTTAAATGCTGAACTGTTAC
A_23_P83463	0.4506	0.0253852	-2.42	-3.3719	-0.248	A_23_P83463	NM_004261	ATATACTGAGCCTCAACAGATTGCCTGCTCCTCAGAGTCTCTCCTATTTTTGTATTACCC
A_23_P22352	0.451	0.0254273	2.42	-3.3733	5.10e-01	A_23_P22352	AK001072	TTTCCAGACCAAGGTTGGGATCCAAATGCGAATCTGAGAAAACTGCTCCCAGGAATCAAA
A_23_P12113	0.451	0.0254415	2.42	-3.3737	2.03e-01	A_23_P12113	NM_014053	GAAAGGCAAAGTTACTGTCCTGTAGTAATTGGGGACAATGTGATCATCCTTGGAGAGAGA
A_23_P10121	0.451	0.0254685	-2.42	-3.3746	-0.537	A_23_P10121	NM_003012	AGAGAGGAGGTTTGCCTGTGATTTCCTAATTATCGCTAGGGCCAAGGTGGGATTTGTAAA
A_23_P19663	0.451	0.0254725	-2.42	-3.3747	-0.663	A_23_P19663	NM_001901	TGGAACTACATTAGTACACAGCACCAGAATGTATATTAAGGTGTGGCTTTAGGAGCAGTG
A_33_P3348164	0.451	0.0255168	-2.42	-3.3762	-0.246	A_33_P3348164	NM_024686	AAATGATATCTGTGTCACGGCCAACTTCTGCATCTCGGTCACATTCCTTAAACCGTGCTT
A_33_P3704280	0.451	0.0255201	2.42	-3.3763	2.69e-01	A_33_P3704280	AK095428	GCAGGTGTAATTAGACATGCTGTACCACTTTTTATTCCCAACATAAATTTGTTGTTTGAC
A_33_P3214129	0.451	0.0255207	2.42	-3.3763	4.49e-01	A_33_P3214129	AK025151	CGTGAGCGGCTCTTCCTGCTGACTGACTACAGCTAATTGACAAAAGGCAGTTTCAAAAAA
A_33_P3405068	0.4513	0.0255511	2.42	-3.3773	2.59e-01	A_33_P3405068	NM_020443	CTGGGGAGGGGTTCAGAAAACATCAAAACACTGCAGCAGTTCCTAAATGATTCTCACAAG
A_24_P396994	0.4517	0.0256713	2.42	-3.3811	1.59e-01	A_24_P396994	NM_001690	TATGCTCAGATATTCATCGTAAGTCTCCCTTCACCTGTTACAGAGTTTCAGATCGGTCAC
A_33_P3329984	0.4517	0.0256769	-2.42	-3.3813	-0.264	A_33_P3329984	NM_152657	AAGCTGGAGCACTACGACTTGCAGGCCACCCATTCCAACTGAGTGTAGTCGGCTCAACAC
A_33_P3346610	0.4517	0.0256861	-2.42	-3.3816	-0.593	A_33_P3346610		TACGCACACATGCACACCCACACAATCGAATGCGCACACACCTGCAGATATGTACACATG
A_23_P204016	0.4517	0.0256999	2.42	-3.3821	3.66e-01	A_23_P204016	NM_000725	CTCACCCTGCCAGGAAGCTTCTTAACATGTGACAGGACCAGGGACCAGGAGCATGGTGAA
A_23_P320457	0.4517	0.0257027	-2.42	-3.3821	-0.208	A_23_P320457	NM_033088	TCGAGACATACAAATCCTTGCTTTGTCAGCTTGCAAAGGAGGAGAGTTTAGGATTAGGGC
A_32_P8551	0.4517	0.0257193	2.42	-3.3827	3.48e-01	A_32_P8551	NM_198443	GTGGTTGTCCAGGCTCTGCAGAGCGCAGCAGGGCTTTTCATTAAAGGTATTTATATTTGT
A_33_P3383891	0.4517	0.0257313	-2.42	-3.3831	-0.571	A_33_P3383891	AK127888	GCTCACTCTCTCGACTTCTGTTCATCGTAACGTTGGAAGTTCTAGACAGAGCAATTAGAC
A_23_P307536	0.4517	0.0257443	2.42	-3.3835	2.43e-01	A_23_P307536	AK056459	TGTTCTGTGAATGTGCGGGCAGGTATTTTTGCCCACATCTGTATATTTGTCTATTAATGT
A_24_P255005	0.4517	0.0257446	-2.42	-3.3835	-0.179	A_24_P255005		AGTTTGAAATTCCGCTAACCCATCAACTACAGTCCGTCATCCCCAACAACGATGTGAGAA
A_33_P3210860	0.4517	0.025748	2.42	-3.3836	2.32e-01	A_33_P3210860	NM_001039886	CGAGGTCACTCCTTGCAGAACATGAGAAAATTCATTTTTGAGATAACTGTTCCCAATGCA
A_33_P3420013	0.4517	0.0257495	2.42	-3.3836	3.46e-01	A_33_P3420013		TAAAGGAATTCTCCAGGAAGGTAGGCAGGCCTCCTACACCATCCCGCAGGGTATACAGGG
A_33_P3424832	0.4518	0.0257881	2.42	-3.3849	1.83e-01	A_33_P3424832		GCTGAATAACACAAAAACCCCTGATCTTTTCAGAAATATGTGAATTGGATATGTCTGTAC
A_23_P20532	0.4518	0.0258121	2.42	-3.3856	3.17e-01	A_23_P20532	AK024257	ACTACCCTAGATGAGCTGTCCTGCTCCAGTAACATTCTTTTTCTAAAATCATTTATAGTA
A_33_P3371663	0.4518	0.0258782	2.41	-3.3878	4.50e-01	A_33_P3371663	NM_002344	ATCCTTCATCTGGGCAGACCCCCCACCCTGCAGATGCTTCTAATAAAAAGCTCTTCTCAT
A_32_P505730	0.4518	0.0258873	2.41	-3.388	2.44e-01	A_32_P505730	BC017967	AATATAAAAGCATCATTTCCTTTGAGAAAAACATGTTTCCCCCTTGACTTGCTATTAGGG
A_33_P3317412	0.4518	0.0258885	-2.41	-3.3881	-0.263	A_33_P3317412	NM_172239	ACAGATCATCCAGAACAGCCAGGACGGCCACAACTCCAGCGAGGACGCAAACGCCTGCCT
A_33_P3365134	0.4518	0.0258942	2.41	-3.3883	2.94e-01	A_33_P3365134	NM_015316	ATAGTGTGGTGAAGAAAAGTGAACGCCCTTGTAGAGCAGCCCGACCACAGGAGCATGGCC
A_23_P38784	0.4518	0.0259007	2.41	-3.3885	1.89e-01	A_23_P38784	NM_014385	TCAAACCCTCTGGTACTGGAGCTGCAAGTGCACCTGGGGGATGAAGGGGAATTCACCTGT
A_32_P405902	0.4518	0.0259048	2.41	-3.3886	2.13e-01	A_32_P405902	NR_026755	TTCATGTGATAAAATGAAACAATTGCTCACACTGATCTCCTGGGATCTCTACTAAGATGT
A_24_P222599	0.4518	0.0259064	2.41	-3.3886	1.62e-01	A_24_P222599	NM_002613	GCTGGTAAAAGCCTCTATTACGACTGTAAGTAAGTTGGATGTTGGCAAAATTAAATTGTT
A_33_P3242493	0.4518	0.0259118	2.41	-3.3888	1.93e-01	A_33_P3242493	NM_006346	AATTGAGCTATCCCAGAAAACTATGATGATCGACAATTTGAAAGTGGATTATCTTACAAA
A_33_P3408711	0.4538	0.0260415	-2.41	-3.3929	-0.651	A_33_P3408711	NM_001456	AAATCAAAGGGTGCTGGTGGTCAAGGCAAAGTGGCATCCAAGATTGTGGGCCCCTCGGGT
A_24_P371053	0.4539	0.0260912	2.41	-3.3945	4.67e-01	A_24_P371053	NM_016467	GAATGAAAAGAGTTACAGACCAACTTAAACATCAATTCGTGTCAGTAAACTGACTTTTGG
A_33_P3348313	0.4539	0.0260968	-2.41	-3.3947	-0.184	A_33_P3348313	NM_001031703	GTCCACCGGGATCAGAGCTTCACTTACCAGTATAAGATACAGGACAAAAGCGTGTCCTTT
A_24_P936122	0.4539	0.0260987	2.41	-3.3947	2.85e-01	A_24_P936122	NM_001001433	GTTTTATCCTAGCTAATGGCTTCTTAAAGGTAATAAAACCCTTCCAACGTAATTGGTCAG
A_24_P310256	0.4541	0.0261607	-2.41	-3.3967	-0.382	A_24_P310256	NM_139284	AAAGCACCGAGGGGTTGATGGCATTCCTTTCCCATTCTAAACTCCACGCAGCCAATCGCT
A_33_P3393013	0.4541	0.0261655	2.41	-3.3968	2.81e-01	A_33_P3393013		CGCACAGGCTGACTCAGCCACCGGCCAAAGGGTTCAAAAAAGAAGCAAGACTTAAAGGAT
A_33_P3394554	0.4541	0.0261796	-2.41	-3.3973	-0.361	A_33_P3394554	NM_001098376	TGTCTGGAGACCTTCCAAGCTGTGCTCAATGGGCTTGATGCACTGCTTACCCACGGGGTT
A_23_P304489	0.4541	0.0261932	-2.41	-3.3977	-0.432	A_23_P304489	NM_015381	TAGATCAACTTGACCGTACTAAAATCCCTTTCTGTTTTAACCAGTTAAACATGCCTCTTC
A_23_P59138	0.4541	0.0261999	-2.41	-3.3979	-0.875	A_23_P59138	NM_002701	GGAGTTTGGGGCAACTGGTTGGAGGGAAGGTGAAGTTCAATGATGCTCTTGATTTTAATC
A_23_P38732	0.4541	0.0262011	-2.41	-3.398	-0.243	A_23_P38732	NM_001792	ATGTATGGTGGAGGTGATGACTGAACTTCAGGGTGAACTTGGTTTTTGGACAAGTACAAA
A_23_P159027	0.4547	0.0262608	-2.41	-3.3998	-0.283	A_23_P159027	NM_015461	GAAGCTTTGAGTGTTCAAGGTTTTCCTTAATGATTTCACGCAGCCAAATTCTTGAATCAG
A_23_P412321	0.4547	0.0262704	2.41	-3.4001	6.41e-01	A_23_P412321	NM_000579	AACAGTAGCATAGGACCCTACCCTCTGGGCCAAGTCAAAGACATTCTGACATCTTAGTAT
A_33_P3530868	0.4555	0.0263437	-2.41	-3.4024	-0.337	A_33_P3530868	NR_040002	AGGATCCTGAGGAGACAGAAGGCAGCAAACAAAATCATGCACAATGGTGAAAAGTGCTCT
A_33_P3371718	0.4555	0.0263484	-2.41	-3.4026	-0.386	A_33_P3371718	NM_002970	TCCATCAACTTCTATAAAAGAAGAGGTGCTTCTGATCTGTCCAGTGAAGAGGGTTGGAGA
A_33_P3400057	0.4555	0.0263762	2.41	-3.4034	1.54e-01	A_33_P3400057	NM_152634	AATCAGTGTTCTCTTAACAGATAACCGGAGTGATACCTTTTATTTGTACAACCCTTTTGT
A_33_P3216098	0.4555	0.0263958	-2.4	-3.4041	-0.233	A_33_P3216098	NR_024159	CAAGTGTCCTGTCTTTTGCAAAAATGTCAAACGTAGCTACTCAGTCTCTTTTTTGTTTTT
A_23_P395172	0.4555	0.0264122	-2.4	-3.4046	-0.412	A_23_P395172	NM_007011	CTGAAGTGTTTAGTGGAGCAAAAATTGTACCATAAACTTGTGTTTACTCTTTTCATTCGG
A_33_P3258274	0.4555	0.0264193	-2.4	-3.4048	-0.314	A_33_P3258274	AB209866	GAGACACTGGAAGAATGCAAGAACATTTGTGAAGATGGTCGTAAGTTTATTTCTTATTTC
A_23_P384499	0.4555	0.0264429	-2.4	-3.4055	-0.187	A_23_P384499	NM_020761	GGCTGTCTTCACAGGTCTGATGTGAAAATTCAATCACGACGTTAACCGGCTCGAGAGAGC
A_33_P3268334	0.4555	0.0264656	-2.4	-3.4062	-0.329	A_33_P3268334	NM_002629	AAGAGAGCGATCCGGACCCTCTGGACAGTGCTAGATGCCATTGATCAGATGTGGCTGCCA
A_23_P431569	0.4555	0.0264827	2.4	-3.4068	2.57e-01	A_23_P431569	XR_109114	CGATTCCTCACAGAATTAAGTGAGAAAACTATGTATGTAGGACTTCTTATGGAGTGGGTA
A_23_P97892	0.4555	0.0264962	-2.4	-3.4072	-0.305	A_23_P97892	NM_003893	CACTCGGTGTGGGCTGTCCAATTCCACTCTCAACTACCTCCGACTCTGTGTGATACTCGA
A_24_P870620	0.4555	0.0265025	-2.4	-3.4074	-0.32	A_24_P870620	NM_002825	CACTCGGACTGGAGCTGAGTGCAAGCCCATGAAGACCCAGAGATGTAAGATCCCCTGCAA
A_33_P3220853	0.4555	0.0265076	-2.4	-3.4075	-0.469	A_33_P3220853		AGCCAGCGAAGCCGCACACGCACACACAGAGGGGTCCCGAGAACACCCAGGACTCAGTAG
A_33_P3315074	0.4562	0.0265669	-2.4	-3.4094	-0.414	A_33_P3315074		TGGGAACTGCTGCTTGTCTGACTTCCATCCATTCATCCATCCACCCACATGCATATCCAT
A_33_P3239405	0.4562	0.0265813	-2.4	-3.4098	-0.293	A_33_P3239405	NM_016456	GTCCACCTTATAGAAACATCAGTGGGCACATTTACAACCAGAATGTATCCCAGAAGGACT
A_23_P350451	0.4566	0.0266192	2.4	-3.411	2.29e-01	A_23_P350451	NM_001198	ATGACATCAGTGTGATCTCTGTAGTGGAGAAGGAAATTCTGGCCGTGGTCAGAAAAGAGA
A_33_P3415350	0.4566	0.0266378	-2.4	-3.4116	-0.319	A_33_P3415350	NM_004770	AATCACTTGTTTGCCCCAGAAATTCATTCCAACCCAGGAGACACAGGTTATTGTCCCACA
A_33_P3324839	0.4573	0.0266931	2.4	-3.4133	1.46e-01	A_33_P3324839	NM_006772	TTGGTCTCTACTCCCAGGGGGAGGGGGGAACTTACTCTAGGAAAAGCCATGTCTCTCTCC
A_33_P3368144	0.4574	0.0267163	-2.4	-3.414	-0.385	A_33_P3368144		AGGGAAGGGAGGGAGGGATCTGAGTTTTCTTGTCACAATGGGGTTTCAGTCCGAGCATGA
A_23_P114713	0.4574	0.0267445	-2.4	-3.4149	-0.623	A_23_P114713	NM_000779	ATCTCCTATAATTGGCAAACTTAAAAATGCAGCAGAAACTTACATTCCAACCTTAGAGAC
A_33_P3298024	0.4574	0.0267476	2.4	-3.415	5.45e-01	A_33_P3298024	NM_001144070	TCAGGTGACCCTGATCACCCTCTGGGTGTACGTGTACGTGGACCCAAACAATGTGCTGGA
A_32_P64096	0.458	0.0268081	-2.4	-3.4168	-0.216	A_32_P64096	NM_001012981	CAAGCACCTCGATAACCAGTGGCAGGTAGGCTGAAGTGAAGGAAGCCTCTGTCAGGAGGT
A_23_P33187	0.458	0.0268141	2.4	-3.417	2.20e-01	A_23_P33187	NM_032558	TTCTACATGAAACATTTTCTCAACACACATTCCTCATGAATGGTCTCATTCAAGGTGTAA
A_33_P3347201	0.4584	0.0268646	2.4	-3.4185	1.77e-01	A_33_P3347201	BC045679	GGTTAAAAATGCTGCTTCCTTTGACCTTTATGAATTTCTGTACCTTTGTCATTCTGTTAC
A_23_P86195	0.4584	0.0268719	2.4	-3.4188	2.18e-01	A_23_P86195	NM_152369	TGATCTGGAAACAAATGATGGATCGTCAGAAAAGCCCTACTTTATGGATCAAGAATTTCT
A_23_P404494	0.4589	0.0269234	2.4	-3.4203	4.48e-01	A_23_P404494	NM_002185	CATCCTGCTTCTACCATGTGGATTTGGTCACAAGGTTTAAGGTGACCCAATGATTCAGCT
A_33_P3355408	0.4589	0.0269344	-2.4	-3.4207	-0.406	A_33_P3355408	NR_038406	TTACTTGTTTAGTATCTGTGTCTTCCATTAGCAAGTAAGTTCTGGCCAGGCGTGGTGGCT
A_33_P3336592	0.4589	0.026954	-2.39	-3.4213	-0.477	A_33_P3336592	AK127052	CAGCCAACAGCAGTATATGGGTCTTATCGGAATATGAAATACTAAAATGTGGGGAAAAAA
A_32_P4595	0.4589	0.026964	-2.39	-3.4216	-0.297	A_32_P4595	NM_000337	CAGTCAGGTTTCTCCCTTTTTGAGATTATGAAGAAGCTGAGACATACTTCTTAAGGAGGT
A_23_P328323	0.4589	0.0269773	2.39	-3.422	2.78e-01	A_23_P328323	NM_018211	AAGAGGTTGAAGGAACTAAAACAAACAAACAAAGGTGTCTGGACTACAGCACAGTGGACA
A_33_P3278649	0.4596	0.0270425	-2.39	-3.424	-0.291	A_33_P3278649	NM_203468	CAGCCAGCCCAGCACCTACTTGTAAAAATTTTGTAATAAAAAGTTTTTCCTAGAGACGTG
A_33_P3321230	0.4596	0.0270989	2.39	-3.4257	2.41e-01	A_33_P3321230	NM_052831	TGGCTTCTGGTGTTTGGCAACTTAATCACAGCCGGGTGCTACATGCTCTTAGGGCCTGTC
A_23_P319270	0.4596	0.0271268	2.39	-3.4265	2.56e-01	A_23_P319270	NM_014984	GATGCCCACGGCTAAGCACCTGTGGCTGCATTTTAACAGTAAAGGAGGCCGTTGTTTTCA
A_23_P153050	0.4596	0.0271656	-2.39	-3.4277	-0.22	A_23_P153050	NM_017758	GTGTCCTTCCAAGTCTAGCATTTGGGGTATGGAAAATTGTTGTGGTGTGTGGTAGGGTTT
A_33_P3280687	0.4596	0.0271838	2.39	-3.4283	1.58e-01	A_33_P3280687	NM_052925	ACCCCTTATACCCCAAGGTCCAGATGGCGGCCAACGTGGGTGATCAACGTAGCACAGATT
A_23_P360542	0.4596	0.0272006	-2.39	-3.4288	-0.504	A_23_P360542	NR_023925	AGGCGAGGCTGGTAAAACAATAGGGTTTGAGACAATTCTGTGGCATTAGAAATGAAAGAG
A_33_P3243399	0.4596	0.0272072	2.39	-3.429	2.91e-01	A_33_P3243399	AY358410	TCCAAATACCTATTCAGATTAGTTGGTTGAATAGCCAGCACTTTGAAGTAGAGCCTTAGG
A_24_P49183	0.4596	0.0272198	2.39	-3.4293	3.32e-01	A_24_P49183	NM_017820	AGGCCTGTAACTGTGACCAGTACCTAAAGGTCTCCAGGGACATGATGAAGCAGCTCATGT
A_33_P3260733	0.4596	0.0272513	2.39	-3.4303	4.21e-01	A_33_P3260733	NM_001242462	GAGTTCAGTGAGGTGCTCTATGTAACACTTCCTCAGATGAGCCAATTTACATGTGAAGAA
A_23_P55107	0.4596	0.0272793	-2.39	-3.4311	-0.183	A_23_P55107	NM_014683	GTATATTAAAGGTCTTGGGGTAGATGGTGTGTGTGAAACAGTGAAGTCTCAACAGCAGAA
A_33_P3295178	0.4596	0.0272866	2.39	-3.4314	1.53e-01	A_33_P3295178	AK128270	CAGGAATTTAGGGGGATAATCTCCCTTGGGACATCATTCTAATCCTATTTATTTAAAGAT
A_24_P481375	0.4596	0.027301	2.39	-3.4318	6.40e-01	A_24_P481375	NR_034089	AGTCATGGTCTCTGAAAGTAAAATGTCTATTCTTCTAATTCTGGCACAATCTTATCTAGC
A_23_P219013	0.4596	0.0273059	2.39	-3.4319	3.79e-01	A_23_P219013	NM_033450	AGCTGTTGTGTTTGGCCAGGGCTCTCCTCACAGATGCCAAGATCCTGTGTATCGATGAGG
A_32_P743184	0.4596	0.0273078	-2.39	-3.432	-0.204	A_32_P743184	NM_199286	CAAGAAATTGAAGCAAAGTTACTTGTGGATAAAGAAAGCATTAGGTAGTTTGGCTATAGC
A_32_P66364	0.4596	0.0273224	-2.39	-3.4324	-0.348	A_32_P66364	NM_001080545	ACCCCACACTCATACAGTAGCTATGCACATCCTGGAAGTCTCCTTGACTGAACTTTAGAA
A_24_P92451	0.4596	0.0273311	-2.39	-3.4327	-0.339	A_24_P92451	NR_038388	AGGGCGCTTTATACGACATTGCTAATGGCACCGACAAGGCACGCTAACGTGGACGCTGTA
A_24_P356338	0.4596	0.0273544	-2.39	-3.4334	-0.198	A_24_P356338	NM_007285	ATGGGACAGCTTTACGAGAAGGAAAAAGATGAAGATGGATTCTTATATGTGGCCTACAGC
A_32_P105825	0.4596	0.0274565	-2.39	-3.4365	-0.326	A_32_P105825	NM_001584	GGAGGAAGGATGGCACATGGGATTCCTTCTCAAGGCAAAGTTACCATAACGGTGGATGAG
A_33_P3423740	0.4596	0.0274651	2.39	-3.4367	2.61e-01	A_33_P3423740	NM_032227	TACAGATGCACATGTTGAATGGAGCTCTTCTGGCATTGCTGTTTCCTGTGGTAAACACTC
A_24_P84752	0.4596	0.0274947	-2.39	-3.4376	-0.385	A_24_P84752	AK002210	GGAGGCAGAGAGAAAGAGGGGAGAGACTTGCCTCTGTTTGCCTACAGGTGCCAAGCCAAA
A_33_P3283626	0.4596	0.0274974	2.39	-3.4377	2.94e-01	A_33_P3283626	AK289844	GAAGGGTTGCCGCTTTTCGGTGGCGCAGTTCTCGCGAGAAGGTGACTTTCTTTCTCGGTA
A_33_P3322949	0.4596	0.0275224	2.38	-3.4384	1.79e-01	A_33_P3322949	NR_027151	ACTGATTCCTACCAACGATATCCAAATCTTAGCATGAGCAGCACGATAAACAGAATGAGC
A_33_P3340613	0.4596	0.0275517	2.38	-3.4393	2.85e-01	A_33_P3340613	NR_026759	TGATGACTTCCTCAATGCCAAGGCCACGTTCAAGATTTTCGACTTCAGTGATGCGTTTGT
A_23_P2573	0.4596	0.0275681	-2.38	-3.4398	-0.173	A_23_P2573	NM_032256	ATGAGAGCAGCACATCCCACCATTTACAATATTCGTATATCTTTCTGCAAATATGGCTCT
A_23_P257905	0.4596	0.0275692	-2.38	-3.4398	-0.336	A_23_P257905	NM_001810	TCCTTCCCCATTGATGACCGCGTGCAGAGCCACATCCTCCACTTGGAACACGATCTGGTT
A_33_P3305536	0.4596	0.0275793	2.38	-3.4401	2.28e-01	A_33_P3305536	AK091261	ATTTTGGAACCAAGCTAGCTGATTTTACACGTTTGATTTTATGATTACATATGGAAAAAA
A_33_P3396120	0.4596	0.0275845	2.38	-3.4403	1.75e-01	A_33_P3396120	NM_032530	TATGCAACAAATGTGGGAAATCTTTTAGGGGTAGCTCAGATCTTATTAAACACCATCGTA
A_24_P21831	0.4596	0.02759	2.38	-3.4405	2.03e-01	A_24_P21831	NM_019591	CTCTGAATGTGGGAAATCCTTCTGTTGGAATTCAGGGCTTCGTATACATCGGAAGACTCA
A_33_P3220425	0.4596	0.0275923	-2.38	-3.4405	-1.06	A_33_P3220425	AK097701	CTATTGTGCCAAAAAGTTGCCATGACTGTCATTAAACCTGTTTAACACCAAATAATAAGG
A_33_P3375127	0.4596	0.0276061	-2.38	-3.4409	-0.541	A_33_P3375127	AK092544	TATAGCACATGGCCTCTTCATGAAGAAACTACTGGGAGAGAAGAAGACAAGCTGGAAGAG
A_23_P120557	0.4596	0.0276163	-2.38	-3.4412	-0.178	A_23_P120557	NM_017714	TTGCTTCTCCGTGGATGAAATAGAAACTCCTCATTGTGTGACCAGGAATGGTTAAATCAT
A_33_P3251209	0.4596	0.0276189	-2.38	-3.4413	-0.336	A_33_P3251209		ACAAAAACATGATCCTTCATCAGTACTGGGAAGTCTGGAACAGCTAAGCCTGGAGTGAAG
A_33_P3352767	0.4596	0.0276413	2.38	-3.442	3.62e-01	A_33_P3352767	NM_002386	GAGCATGGGGCCAGGAAAGTCTGGTAATAAATGTGACTCAGCATCACCCACCTTAAAAAA
A_24_P336417	0.4596	0.0276513	2.38	-3.4423	2.48e-01	A_24_P336417	NM_004736	ATTCGGTTACTGCCCTTTAATACACTCCTATCATCAGCACTTCCACCATGTATTACAAGT
A_23_P83028	0.4596	0.0276574	-2.38	-3.4425	-0.371	A_23_P83028	NM_021111	CACTTAAAGCTTTCAGAATATGTCAGTGCTGATGTAGCATGCTTGTTGCAATTGCCTTTT
A_23_P251785	0.4596	0.027711	2.38	-3.4441	1.89e-01	A_23_P251785	NM_024561	CCCTAATCTATTTAGATTCATACTTATTGAGACGGGAAAAACTCGCTGTAAAATAATGCC
A_24_P167877	0.4596	0.0277143	2.38	-3.4442	4.03e-01	A_24_P167877	NM_001135865	CCCGAACCCAAGAGGCGGAGGGTCGGTGATGTGGAACCGTCACGCAAACCCAAGAGGCGG
A_24_P67408	0.4596	0.0277262	-2.38	-3.4445	-0.217	A_24_P67408		CATCCTCTTCTGGGCCGTTGCTAGCCAGTTTCGCATCTTCACCAGCATCGGAGAGGACTA
A_33_P3241369	0.4596	0.0277288	-2.38	-3.4446	-0.191	A_33_P3241369	NM_053049	AGACGCCTCTTCGGGAGAGGAGGAGGAGGGCAAAGAGAAAAAGACTTTCCCCATCTCTGG
A_33_P3474859	0.4596	0.02773	-2.38	-3.4446	-0.689	A_33_P3474859	BC110369	CTGTTAATAGCATGGTTTACTGAATATTTTAATCCCACTATTGAGACCTACTGCTCAGAA
A_33_P3305749	0.4596	0.0277387	-2.38	-3.4449	-0.18	A_33_P3305749	NM_000965	CCTCACATGTTTCCAAAGATCTTAATGAAAATCACAGATCTCCGTAGCATCAGTGCTAAA
A_23_P430411	0.4596	0.0277485	2.38	-3.4452	2.30e-01	A_23_P430411	L78790	TGTCCCCACAAAAAGTGACGCTTTACCTGCGACCAGGCTTCGGGTCCTTCGTGGACAAGA
A_23_P21548	0.4596	0.0277613	-2.38	-3.4455	-0.286	A_23_P21548	NM_024605	GATCAGGAGGGGAATGTCAGGATTCGCAAAATGGACTTTTCATTTGTCCAGTATTGGGAC
A_23_P107313	0.4596	0.027767	-2.38	-3.4457	-0.197	A_23_P107313	NM_006923	TGTAACCTCTGTGGATGACAGCAACAGTTACTGGAGGATACGGGGGAAGAGTGCCACAGT
A_33_P3322654	0.4596	0.027799	2.38	-3.4467	2.77e-01	A_33_P3322654	NM_018226	CAGCCTGGGACTGCTGTGATGGGGTATCACGGTGATGGTCCCATTAAACTTCCACTCTGC
A_32_P10133	0.4596	0.0278218	2.38	-3.4473	6.57e-01	A_32_P10133	NR_023388	TGTAATCAGTTCATCTTACCTTGCCGGGCTCTGAAAGAATGAGTGTGTGGGATCAGATTT
A_32_P103945	0.4596	0.0278291	-2.38	-3.4476	-0.194	A_32_P103945	NM_212543	CCAAGGTAGAAAGGTACGAAGATACAATACTGTTATTCATTTATCCTGTACAATCATCTG
A_23_P346813	0.4596	0.0278489	-2.38	-3.4481	-0.265	A_23_P346813	NM_002578	AGGTGATCCATAGAGATATAAAGAGTGACAATATTCTTCTCGGGATGGATGGCTCTGTTA
A_33_P3270369	0.4596	0.0278516	2.38	-3.4482	8.73e-01	A_33_P3270369	XR_110039	ATGGCCTCTCCATTGGTAACGTTTCTGCAGATGTGTTTCATCTTCCCACTAGATCCTTGA
A_33_P3422659	0.4596	0.0278671	2.38	-3.4487	1.89e-01	A_33_P3422659	NM_018972	CTTCATTTAAATATGCACGGTTAAAATGAATAGCGGCCTAAAGAATAACACTGATCTCTC
A_24_P159434	0.4596	0.0278754	2.38	-3.4489	5.11e-01	A_24_P159434	NM_007261	AGTTTCTCTGGACTCTTAGGTTTATTTTTAATATGAAATATAAAAACAGTTTCAAATATC
A_24_P114255	0.4596	0.0278768	2.38	-3.449	1.74e-01	A_24_P114255	NM_138799	GACAAGGCAACCATCTGGCTTATGCTATATAATACTTCATTTAAAGAAGAAAGGAAAAGC
A_23_P93772	0.4596	0.0278876	2.38	-3.4493	3.53e-01	A_23_P93772	NM_019102	ACCCGCAGAAGGAGGATTGAAATAGCACATGCTCTTTGCCTCTCCGAGAGACAAATTAAA
A_33_P3211628	0.4596	0.0279268	-2.38	-3.4504	-0.185	A_33_P3211628	NM_004705	ATACCTTAGCCATTGATAATCTACCTGTTTAAATGGCCCCTGTTTGAACTCTCATGCTTT
A_33_P3287584	0.4596	0.0279423	-2.38	-3.4509	-0.244	A_33_P3287584	NM_133471	AAAGAAGAGTGGCCAGTTCCAGGGGTAGCTCCAAAAGAGACTGCAGAGCTGTCCGAGACC
A_23_P311875	0.4596	0.0279501	2.38	-3.4511	5.27e-01	A_23_P311875	NM_006725	ACCAGTTCTGCAGTGACTGTCCCTGGACAATGGGTCTTTATTCTGAGTTTCCTATGGTTT
A_23_P207967	0.4596	0.0279547	2.38	-3.4513	3.44e-01	A_23_P207967	NM_014772	CTCCAAGAAGCCAAGTCCCAGTCTGTTTTCTGGCATCAGACACCGGCCCGTGTTCCTTGT
A_23_P2446	0.4596	0.0279656	2.38	-3.4516	2.13e-01	A_23_P2446	NM_014254	CTTCAGAGTGATCTCACATTGTGCCCGGTCGGAGTAAACACAGAATGCTATCGAATCTAT
A_23_P205575	0.4596	0.0279892	2.38	-3.4523	3.00e-01	A_23_P205575	NM_022571	AGACGGGGGAGGCTTACCACTTTCCCCAAACAACATAAAAGACAATGTCCCTTCTTCAAA
A_24_P387321	0.4596	0.0279899	2.38	-3.4523	2.24e-01	A_24_P387321	NM_016264	GGGAAAGCATTTAGTTCTTTTAAATACTTTTGTCGCCATGAAAGGACTCACAGTGAAGAA
A_23_P110412	0.4601	0.0280468	2.38	-3.454	2.95e-01	A_23_P110412	NM_001080506	CTCATGGACAAAGATGTAGACCAAATGCAAGAGCTGAGCTTGCTTTGGGTTCAACCATGA
A_23_P6066	0.4601	0.0280978	2.37	-3.4554	5.00e-01	A_23_P6066	NM_019609	TCACGCCCACACCAGATGATGCTGTGTTTCGCTGGCTCAGCACTGTCTATGCTGGCAGTA
A_23_P139260	0.4601	0.0280981	2.37	-3.4555	3.22e-01	A_23_P139260	NM_183233	GTCTTCGGCCACGTGCAGGTTGCTATCAATACCCTTGTCCTCCTGGTCCTCTGGAGGAAA
A_33_P3317576	0.4601	0.0280997	-2.37	-3.4555	-0.164	A_33_P3317576	NM_001195643	CCTGTCTCAAAAAAGAATCTGAAAACAACGGAACCATGCCTTCAGAATTCTATAAAGTTA
A_23_P365844	0.4601	0.0281033	-2.37	-3.4556	-0.248	A_23_P365844	NM_153232	GAGTTATTAGGACTGGAAGGCTATGAAAAGAACTTGAAATTGTCGGAATATGTGCTCTCT
A_23_P413641	0.4601	0.0281305	2.37	-3.4564	3.32e-01	A_23_P413641	NM_020820	CAAAGAAAGGTATGTTGTCTAACAGGGGACCAACAGAAGGTAGTATTGACAACTGTTCCC
A_23_P109026	0.4601	0.028131	2.37	-3.4564	2.38e-01	A_23_P109026	NM_022358	ACGAGCAGTTTCTCATTACTGTCTGTGGCTAAGTCCCCTCCCTCCTTTCCAAAAATATAT
A_23_P54340	0.4602	0.0281542	-2.37	-3.4571	-0.235	A_23_P54340	NM_032445	AGAGTGGGAAGACAGCTCTACTAACCCTTCAGCTCTAGCAGTCCATGACTTTTTAAGGAA
A_33_P3210423	0.4603	0.0281782	-2.37	-3.4578	-0.144	A_33_P3210423	NM_004774	ACAAAGGGCTGTCGGATGCACTGATCTGCACAGATGACTTCATTGCCAAAGTTGTTCAAA
A_23_P82868	0.4603	0.0282217	-2.37	-3.4591	-0.541	A_23_P82868	NM_000930	TGAACAACTAGGCTTCAGCATATTTATAGCAATCCATGTTAGTTTTTACTTTCTGTTGCC
A_32_P19716	0.4603	0.0282246	2.37	-3.4591	2.07e-01	A_32_P19716	NM_001080470	AACCTGGAGCAATTTAAATAGGCTAAATGGTTTTGATTAAATCTTGAGCTCCGAGTTGGA
A_23_P58877	0.4603	0.028225	-2.37	-3.4592	-0.168	A_23_P58877	NM_020399	AAGGTTTCATGTGATTCATGTGTAAGATGCACAGTATTTGACATCCTGATTATGTAATCC
A_33_P3217500	0.4605	0.0282686	2.37	-3.4604	2.41e-01	A_33_P3217500	DW451783	GGTTAATGTGTAATTGCTTCACTGAGCATGTGCTGTGACCCAGGCAGCACATAAAACAGA
A_32_P142881	0.4605	0.0282806	2.37	-3.4608	3.47e-01	A_32_P142881	NM_015092	AGAACAAGATCAGAAGTGGCAGTCTATAACTGAAAATGTGGTAAAGTACTTGAAGCAAAC
A_33_P3303430	0.4605	0.0282822	-2.37	-3.4608	-0.272	A_33_P3303430		GCATGGGCTCCATCTCCTTCAGCCACACCAGCTTCACCAGGGCCATAGTTGTGAAGAAGA
A_33_P3587611	0.4607	0.0283194	2.37	-3.4619	1.69e-01	A_33_P3587611	BC020828	CCTATATTCCAAGTACAAACACTGTCATTGCTATACAAATGGAACTTTATGACAATTCCC
A_33_P3296807	0.4607	0.0283446	2.37	-3.4626	2.15e-01	A_33_P3296807	NM_001166419	CTAGACTGCTGAATACTGAAGGATCAGGTTTCTCATCAAGAAAACTGCATTTTAAATGAA
A_23_P383132	0.4607	0.0283484	2.37	-3.4627	3.69e-01	A_23_P383132	NM_015094	TGTCACTTGTCACATTGAGTTCATGTCCCTTGAGAGTTTGTATAAATTCAGGTCAGAGCT
A_33_P3213086	0.4607	0.0283674	2.37	-3.4633	5.47e-01	A_33_P3213086	BX457161	GGCTGATTCCCTTAAAAAATTAACTATGTTAGAGTCTCCACTGGAAGGTACATCATGTTG
A_33_P3258557	0.4607	0.0283802	-2.37	-3.4637	-0.223	A_33_P3258557	NM_172239	ATCCAGGAATCTACGCCTTGGACTGTGAGATGTGCTACACCACGCATGGCCTGGAGCTGA
A_23_P80068	0.4609	0.0284041	-2.37	-3.4644	-0.233	A_23_P80068	NM_006806	AAGTGGACGATTTGTTCTAGCACCTTTGAGAATTTACTTTATGGAGCGTATGTAAGTTAT
A_32_P452655	0.461	0.0284542	2.37	-3.4658	4.62e-01	A_32_P452655	NM_001040078	TGACCAGAGTGTTCTCTTCAGGGGACTGGCTCCTTTCCCAGTGTCCTTAAAATAAAGAAA
A_33_P3334185	0.461	0.0284565	2.37	-3.4659	2.39e-01	A_33_P3334185	NM_015239	GGAGTTGTGGAACTGATGTTTAAAATCATTGGACCATTTAGTAAGAAGAATTCCAGTCTT
A_23_P142974	0.461	0.028462	2.37	-3.466	2.60e-01	A_23_P142974	NM_001007231	CATCTCTGAGACACAGGGGCAGAAAATGACATTCATCTTTTGAGTCCTCATCCATGGAGT
A_33_P3262884	0.4615	0.0285066	2.37	-3.4673	2.52e-01	A_33_P3262884	AK091705	GGCCACGCTAATGGTGAGTTAGTGCTGTGGTACAGAAGCAGCCAACCTGTGCCTACTCAT
A_23_P134176	0.463	0.0286253	2.37	-3.4707	3.16e-01	A_23_P134176	NM_001024465	TTGATGTGTGGGAGCACGCTTACTACCTTCAGTATAAAAATGTCAGGCCTGATTATCTAA
A_32_P197489	0.463	0.0286747	-2.37	-3.4721	-0.197	A_32_P197489	NM_015995	TTGTACAGTTCCCAGTCTGGCCTTGGCTTGCTCGGATAAAACTTTGTATGTATTTTGTAT
A_23_P93258	0.463	0.0286781	2.37	-3.4722	3.89e-01	A_23_P93258	NM_003537	GGCTCTTTGAGGACACAAACCTTTGCGCCATCCATGCTAAGCGAGTGACTATTATGCCCA
A_32_P109604	0.463	0.0286793	2.37	-3.4723	6.72e-01	A_32_P109604	BC022380	AGAGATAATAACTAATATCCAAAGAGGCTTTATTGAGAGTGGAAAGAAAGACCACATGCT
A_32_P75902	0.463	0.0287247	-2.36	-3.4736	-0.217	A_32_P75902	NM_152764	TTACATGTGGTGAACATGTTTCTAGAAATTGTTATGGTGGAGGTGGTCTGGGTGAGTCTG
A_24_P302685	0.463	0.0287415	-2.36	-3.4741	-0.177	A_24_P302685	NM_015320	TCCATCACTGAACTGCAGAGGAAGCAGGCCATGCTGAATGCCAGCAAGCAGCAGGTCACA
A_33_P3420889	0.463	0.0287538	-2.36	-3.4744	-0.196	A_33_P3420889	NM_014978	CTTCACATTCCTTGCAGAAGGAACCGACACCATCACAGTCCAGGTGGCTGCTGGGAATGC
A_33_P3349444	0.463	0.0287549	2.36	-3.4744	2.51e-01	A_33_P3349444	NM_000262	TTCGAATTAGGAGTAGAGAGATCTGACCTCTTGCCAGGAATGCCCATGGATCATGTGATT
A_33_P3238573	0.463	0.028757	2.36	-3.4745	2.49e-01	A_33_P3238573	NM_014856	ATTGTTCCCTGCGAAGTTTTGTTGGATGTAAATATAGTAAAAGCTGCTTCTGTCTTTTTC
A_24_P86993	0.463	0.0287921	-2.36	-3.4755	-0.331	A_24_P86993	NM_032801	AGTGAAACGCCTGAATCAAAAGCAGTTTTCTAATTTTGACTTTAAATTTTTCATCCGCCG
A_33_P3372004	0.463	0.0287935	2.36	-3.4755	5.61e-01	A_33_P3372004	NM_005849	CAACTGGCTACAAAGAAGGATGTCAGAATGTAAGGAAACTATAACTAATAGTCATTACCA
A_23_P308136	0.463	0.028823	2.36	-3.4764	2.11e-01	A_23_P308136	NM_178125	GAGCTCATCGCCAAACTGGTGAACAACCGGACCCGAATCGTCAATGAGTCGGATGTCTTC
A_33_P3363120	0.463	0.0288484	2.36	-3.4771	2.75e-01	A_33_P3363120	NR_004387	ACTTAGCTTGTGTTATGGCCACTGAGAGATGAAACACAGATCTTTGGTAATCTGATGGCT
A_33_P3276207	0.463	0.028852	2.36	-3.4772	2.45e-01	A_33_P3276207	NM_001134456	CCTGTCCTTGAGGAACACCTTCAAGTTTTTAAAGTATTTTAGGGGGAAAGAAGATTTTTA
A_23_P131089	0.463	0.028859	2.36	-3.4774	8.28e-01	A_23_P131089	NM_198471	GACAATGGAGAGAACCCCCAGGTTCAGTAAGCTGCCTCGTCTGGCTCACTACACCTAGCT
A_33_P3419938	0.463	0.0288613	-2.36	-3.4775	-0.524	A_33_P3419938	NM_000551	TGTAATCCTAGCTACTTGGCAGGCTGAGGTGAGAAGATCATTGGAGTTTAGGAATTGGAG
A_33_P3732466	0.4632	0.0288863	2.36	-3.4782	4.78e-01	A_33_P3732466	AL359570	CGTGACAAATCCTTAAAGGATACACACATGACAGGAAGGATTAGAAGAGGAAACAGAAAC
A_33_P3283599	0.4633	0.0289195	2.36	-3.4791	3.27e-01	A_33_P3283599	NR_003366	TCCTTATGGAGAAAGAGCGGATGAAATATTTTCTCAGCACTCTTCCTACAAGGCGAGACC
A_33_P3382766	0.4633	0.0289408	-2.36	-3.4797	-0.2	A_33_P3382766	AK093358	TGTACTCATCTTGATCCTAGAAAAGAGGCCACTCAGGATGGGGATGAGATTTCAGTTGCT
A_33_P3229181	0.4633	0.0289559	2.36	-3.4802	2.56e-01	A_33_P3229181	NM_020246	GTGGTGATGTTTTCGTTCTGTTTTATTTTTCTAACTCTGCTGACCATGAATAAAAGACCA
A_33_P3252794	0.4633	0.0289588	2.36	-3.4802	3.16e-01	A_33_P3252794	NM_138465	GGTGGGCACTGCCCAGCACCGCATGCCACGTGTCCGGAATAAATTCTTTTTGATTGTTGG
A_33_P3382143	0.4642	0.0290345	2.36	-3.4824	1.82e-01	A_33_P3382143	NM_001243466	ATGAAGAGGATGAAAGTTCCCGACTACAAAGACAAGGCTGTCTTTGGCGTTCCTCTCATA
A_23_P135239	0.4642	0.0290522	-2.36	-3.4829	-0.394	A_23_P135239	NM_005077	ATGATAAGTACATAGTCACTGGCTCGGGGGACAAGAAGGCTACAGTCTATGAAGTCATCT
A_33_P3316884	0.4646	0.0290894	2.36	-3.4839	6.13e-01	A_33_P3316884		TTAACAAGCGTTTATCCAGCGCACGTGTTGCGGTCGGACCCCATGCGAAGGAGCTAAGGA
A_24_P170726	0.4647	0.0291116	-2.36	-3.4846	-0.472	A_24_P170726	AK094407	CTTACCCTCTTTGGCACTGCTGGTGACCAAGAAGCTGCAAGCATGGCATGTGGGTGGACA
A_24_P925664	0.4648	0.0291386	2.36	-3.4853	2.25e-01	A_24_P925664	NM_002392	TATGATGGTAACCACAAGTTGTTAATGGCATTGTGAAAAGTTTTTAGTTGCGCTTTATGG
A_23_P129476	0.4649	0.0291577	2.36	-3.4859	2.75e-01	A_23_P129476	NM_004913	GCAGTCCAGTTTCTCTCCCCTCTGACCCCTAGAAGGGGAGTTGTAGCCCCATGAACTAGT
A_23_P39386	0.4651	0.0292031	2.36	-3.4871	5.62e-01	A_23_P39386	NM_014266	TGACCCTCCTGCAGCTTGGACCTTTGACTTCTGACCCTCTCATCCTGGATGGTGTGTGGT
A_23_P68240	0.4651	0.0292166	2.36	-3.4875	4.89e-01	A_23_P68240	NM_207328	AATATAATCATTGAGGCTTGATTGTCCCTTGCCATCTCTTGCTTTTTCCCTTCTTTGATG
A_32_P215943	0.4651	0.029221	-2.36	-3.4876	-0.17	A_32_P215943	NR_026828	CTGTAAATTTCAGTGTTATATGTCATGAAAACTGGTGTGGGCAGATCTGTTGGTTGAAAT
A_33_P3290667	0.4651	0.0292348	-2.36	-3.488	-0.264	A_33_P3290667	NM_016275	CTTGACAATGAAATGAAGCTCAATGTGCATATGGATTCAATCCCACACCATCGATCATAG
A_23_P305914	0.4651	0.0292782	-2.36	-3.4892	-0.409	A_23_P305914	NM_014653	GGAGAAGGTGCGTGTAAAGAGATATATTTTTGTAAGAGGAATATGATTAATACATTCCGC
A_23_P500300	0.4651	0.0292874	-2.35	-3.4895	-0.243	A_23_P500300	NM_033229	AGCCAGCGGGCTTTCGGGGAAAAAAAAGAAAAAGACATCTAAAATAAAATGTTTAAACTG
A_33_P3323435	0.4651	0.0292935	-2.35	-3.4897	-0.23	A_33_P3323435	NM_033141	TTCTTCTTCATTCTTGATGGGGAGAAGTACATACAAAGTTTGTTCTGACAGGGCGCGGTG
A_33_P3212037	0.4651	0.029301	2.35	-3.4899	1.89e-01	A_33_P3212037	AB012143	CATTTTCAGTGTACTTTTCCTGGATGTTCTCTTATCTAGAATCCATCAAAACCTTGCTAA
A_23_P42718	0.4653	0.0293321	2.35	-3.4907	2.56e-01	A_23_P42718	NM_004289	CAGCCATCCTTTTTAAGAGTAAGTTGGTTACTTCAAAAAGAGCAAACACTGGGGATCAAA
A_24_P5743	0.4661	0.0294058	2.35	-3.4928	3.03e-01	A_24_P5743	NM_153329	CTTGCACCAAGACGTCCAGGCCATGTGGTATTTCGGATCAGCCCAGGGTTCCCAGTTTGT
A_23_P329924	0.4661	0.0294105	-2.35	-3.4929	-0.197	A_23_P329924	NM_177551	ATTGTCAAGGTGTTGCCGCCGGTGTTGGGGCTGGAGTTTATCTTCGGGCTTCTGGGCAAT
A_33_P3222698	0.4661	0.0294405	2.35	-3.4938	1.76e-01	A_33_P3222698	NM_006991	GTTGTGAGGGTTAAGTGAAAGGATCTTTGTGAAAGTACTTTTTGAAATCATTCAGTTGTC
A_33_P3241741	0.4661	0.0294581	2.35	-3.4943	3.17e-01	A_33_P3241741	NR_002962	AAGAGTAACTTGGGATCATAGTACTGGTCTAGTGTTGTCTCTGGACACATCTACCACTGG
A_33_P3253179	0.4661	0.0294632	-2.35	-3.4944	-0.274	A_33_P3253179		ATTCGGCACATGAGATACGTGGCCAGGATGACGGTGATGGTGAAAGATTCCCAGGTGGCC
A_33_P3718152	0.4666	0.0295076	-2.35	-3.4956	-0.395	A_33_P3718152	AK055876	TTAATCTCAAAAGCCTAACACCAGGGTAGTCTCTCTCAGCCTACTCTGGCTTGAAAAGCT
A_33_P3383796	0.4666	0.0295398	-2.35	-3.4965	-0.526	A_33_P3383796	NM_001010917	CAAACACCACTCCACATCAGATCTGAATTTGAGCTCTGGCTTCATGACACTGACACATGA
A_33_P3303259	0.4666	0.0295425	2.35	-3.4966	2.01e-01	A_33_P3303259	NM_006437	AAATATATCTTTCCTTTGGATGACAAGGCCGCTGTGTGTGGCTTCGAAGCCTTCATCAGT
A_23_P202392	0.4666	0.0295636	-2.35	-3.4972	-0.159	A_23_P202392	NM_024670	ATTTGCCAAATGTATTACCGATGCCTCTGAAAAGGGGGTCACTGGGTCTCATAGACTGAT
A_32_P103614	0.4666	0.0295856	2.35	-3.4978	1.76e-01	A_32_P103614	XR_109015	CTGGTCATTTTAGGCCCGAGTCGAGCCTCTCTTGATTAATAAATGAATATGGCTCGTTTT
A_33_P3365878	0.4666	0.0295945	-2.35	-3.4981	-0.445	A_33_P3365878	NM_001720	ACATTGCACTTCAGCCTGGTGACATGAGCAAAACTGTTGTCTCAACAAAATGAAATTATG
A_33_P3375899	0.4672	0.029648	2.35	-3.4995	1.51e-01	A_33_P3375899		GTATTTCGCCACCCAGATAAAATGAGTGTTTTCACAGCTGCCGTTAATTTCTTACCCTGA
A_23_P168443	0.4674	0.0296985	2.35	-3.5009	2.97e-01	A_23_P168443	NM_004444	AGATCTCTGCTGAGGACCTGCTCCGAATCGGAGTCACTCTGGCGGGACACCAGAAGAAAA
A_23_P203841	0.4674	0.0297519	-2.35	-3.5024	-0.29	A_23_P203841	NM_013449	GCAATTTTCCCTTGGTATAAGATGTGCTAGATTAATTTCATTGTGAGGTGGATGGGGGAG
A_23_P69941	0.4674	0.0297711	2.35	-3.5029	2.19e-01	A_23_P69941	NR_027706	GCGACTTTTGATGGAGTTTCCTCTCATAGTGATTTGCCACAAAGGACCTTCTGTAGGAAG
A_33_P3260100	0.4674	0.0297803	2.35	-3.5032	2.73e-01	A_33_P3260100	NM_138493	AGGACATGGTGCTGGTCCCTCCCTTAGCCCAAGGGAGAGGCAATAAAGAACACAAAGCTG
A_24_P236251	0.4674	0.0297808	-2.35	-3.5032	-0.295	A_24_P236251	NM_003836	GGTATCGTCTTCCTCAACAAGTGCGAGACCTGGGTGTCCAACCTGCGCTACAACCACATG
A_23_P34915	0.4674	0.0297836	2.35	-3.5033	8.58e-01	A_23_P34915	NM_001040619	GATGTCAATAGCATTGTTTTTGTCATGTAGCTGTTTTAAGAAATCTGGCCCAGGGTGTTT
A_33_P3260684	0.4674	0.0297863	-2.35	-3.5034	-0.191	A_33_P3260684	NM_001005471	TTATTAAACCCTCTCATCTACAGTCTGAGGAACAGGGATGTGATGGGTGCCTTGAAGAGA
A_33_P3809328	0.4674	0.0297919	-2.35	-3.5035	-0.558	A_33_P3809328	AF111846	GAGACTACCAATAAACACACATACACACACATGAACATACACACAATGTTTACTATCTTG
A_24_P706340	0.4677	0.0298289	-2.35	-3.5045	-0.522	A_24_P706340	NM_001080396	CTGTCTTTATGTCCTGTCAGCTTCTATTAGAGGAATGATTGCTATGACCTCATGGTATAG
A_33_P3329784	0.4679	0.0298674	2.35	-3.5056	1.86e-01	A_33_P3329784	NM_015114	GACTAGAAGAATATCTCACACAGCAGGAAATAGGCAAAAAGGCTCAACAAGAAACAGGAG
A_32_P150086	0.4679	0.0298699	2.35	-3.5057	6.11e-01	A_32_P150086	NR_040113	AGTCATTAGCTTTAGAAACTGTACAAAACGACCTAAGCCAAACACAGCAGCAAATAAAGG
A_24_P340128	0.4679	0.0298883	2.35	-3.5062	4.91e-01	A_24_P340128	NM_178129	AACACAGGTCTATTGACTCACACACATGTTTTAAGATGGAAAACTTTACTTCTGTTCTTG
A_23_P142187	0.468	0.0299125	2.34	-3.5068	3.48e-01	A_23_P142187	NM_022462	ACCCCCCAGCTTTCTTTCTACAGATGGTGCTACTCTTGGTCTCCCACAGGAAAAGGCCTC
A_23_P307968	0.4682	0.0299996	2.34	-3.5092	4.80e-01	A_23_P307968	NM_052836	CCATCTGACGCTACAGTCACCACGACCTTCAATATCCTGGTTATTGACATCAATGACAAT
A_24_P709377	0.4682	0.03	2.34	-3.5092	9.84e-01	A_24_P709377	NR_015377	GCAAAGAACGCCACAAAACAGTGAGCTCAACTTCTTGAAAGTCATAATGTGTTGCTAAGT
A_23_P164451	0.4682	0.0300237	2.34	-3.5099	4.66e-01	A_23_P164451	NM_005994	GGGCCTAGACCGCGTGATAAAACTGGGTTGAGGGATGCTGGAACCAGTTACGACTGAAGT
A_33_P3892710	0.4682	0.0300252	2.34	-3.5099	1.47e-01	A_33_P3892710	AL706006	GCCTCCGCTAGTATTAACACATCAATTTGTATAAATAAGTATCTGACACGTCCTATATAC
A_33_P3314468	0.4682	0.0300468	2.34	-3.5105	3.17e-01	A_33_P3314468	NM_001100170	ATCTCTAGTGTATCAGAAGTAATGAAAGAATCTAAACAGCCTGCCTCACAACTCCAAAAA
A_23_P201845	0.4682	0.0300533	2.34	-3.5107	3.07e-01	A_23_P201845	NM_007167	CAGTGTGATGTCATTGGCAAAAATACCTGCTACCTTATCTACAGGGAACACTAACAGTGT
A_24_P419087	0.4682	0.0300678	2.34	-3.5111	2.37e-01	A_24_P419087	NM_006576	CCCTCCAGTAAGACTCTTCCAAATTCATGGAAATGACAAATCTAACACCAAAGCAGTGGA
A_23_P68851	0.4682	0.0300695	-2.34	-3.5111	-0.244	A_23_P68851	NM_001039570	CATCGTGGGTCTCATGCACGTCAAGACCTTCCCACATCCAAACTCAGCTTCCAGCAGGGA
A_33_P3381458	0.4682	0.0301007	-2.34	-3.512	-0.199	A_33_P3381458	AK094155	AAACCTGATGGCATGCACACGCATACACACGCATGCACGTGTCCTGATGGCACGCACACA
A_33_P3362048	0.4682	0.0301415	2.34	-3.5131	3.64e-01	A_33_P3362048		TAAGCTTCCCAGCTGTAGGATTTCTGTTCCACGCCTGCTCTCTGACAGAACTCTTTTATT
A_33_P3232280	0.4682	0.0301459	2.34	-3.5132	2.43e-01	A_33_P3232280	NM_018164	AACAACTCAGAGAAACATCAAAGAGTCTTGGAATGTCTGATGGCATGCAGGAGCAAACCC
A_33_P3420266	0.4682	0.0301623	2.34	-3.5136	3.14e-01	A_33_P3420266	NM_001012421	ATAGACCACGTCTACACGGGTTCCGGATACCGAATCCGCGACTCCGAACTGCAGAAGATC
A_23_P102876	0.4682	0.0301938	-2.34	-3.5145	-0.174	A_23_P102876	NM_006585	GACTTGAACAGTATGCTATTAAGAAGTTTGCTGAGGCATTTGAAGCTATTCCCCGCGCAC
A_24_P251962	0.4682	0.030197	-2.34	-3.5146	-0.342	A_24_P251962	NM_018936	AATGAGTTCAAGTTCCTGAAGCCAATTATCCCCAACTTCGTTGCTCAGGGTGCAGAGAGG
A_33_P3297621	0.4682	0.0302109	-2.34	-3.515	-0.177	A_33_P3297621	NM_015047	GCCACCATGATCACTAAGAGACTGGCACAGGTGAAGCTCCTGAATCGGGCCTGGCGATAA
A_33_P3649472	0.4682	0.0302109	-2.34	-3.515	-0.5	A_33_P3649472	NR_027078	GTCTTCAAGTTCACTGATCTTTTCTTCTGCACTATCTAATCTGATCTTAGTCCTATCCAG
A_23_P46924	0.4682	0.0302139	-2.34	-3.515	-0.153	A_23_P46924	NM_001007793	CATGATGCCCCTATCAGATGTGTTGAATACTGTCCAGAAGTGAATGTGATGGTCACTGGA
A_32_P36942	0.4682	0.0302161	2.34	-3.5151	2.42e-01	A_32_P36942	NM_001039693	GTTTACAGATGAGGTCTGTCTATATCTCCTCTTATGTTTTTCTCTTAAGAACTTCAAGTG
A_33_P3261084	0.4688	0.0303109	-2.34	-3.5177	-0.284	A_33_P3261084	NM_174855	TCTGAGGAGAAGCTGGAGCAGGTGCTGAGTTCCATGAAGGAGAACAAAGTGGCCATCATT
A_23_P120794	0.4688	0.030316	2.34	-3.5178	4.77e-01	A_23_P120794	NM_004173	TGGACTCTGCCCAGAGCCTTCTTGTTTATGATCAGCTCCAGCTACCTGGGCAGTTGTGGT
A_33_P3636257	0.4688	0.0303207	-2.34	-3.5179	-0.263	A_33_P3636257	NR_033829	TAGAAAAGCAGCATAAGTATGAGGTTGGAACTTCCCACGATACTTAGTACATGGAAAAAA
A_33_P3267731	0.4688	0.030322	-2.34	-3.518	-0.166	A_33_P3267731	NR_034016	ACGCAGCATCCGACACATCCCACAACCTTGAGTCTGCTATGAGTCAAGTGTGGTCGCTGT
A_23_P60579	0.4703	0.0304476	-2.34	-3.5214	-0.211	A_23_P60579	NM_002435	TATGGCTTTAGGCTAGCTGTTAAATATGTGACCCAGCATTAGCTCAGCATCTGTCAGAGC
A_24_P383901	0.4703	0.0305075	-2.34	-3.523	-0.261	A_24_P383901		CATGTACCCTGGCATCACCAACAGGATGCAGAAGAAGATCACCGCCCTAGCACCCAGCAT
A_23_P161644	0.4703	0.0305102	2.34	-3.523	2.41e-01	A_23_P161644	NM_006328	CTTTGCTTTGTGGATTACTGATTTCAAGTTCTATAACTTGGGGAAAGTTAGGTTGAGTGA
A_24_P272254	0.4703	0.0305127	2.34	-3.5231	1.16e-01	A_24_P272254	NM_205856	CTGGCCATGATTTATCTGAATGGCTCAAGGGGTGTGATATGCATGTGAAAATTGATCCAA
A_33_P3385062	0.4703	0.0305229	2.33	-3.5234	1.88e-01	A_33_P3385062	NM_024511	GACAATATGTGTATTGTGCTGCTATAGAAATGTAAACTCTTAGGTGGCAAGGATTATTGG
A_33_P3305497	0.4703	0.0305323	2.33	-3.5236	1.64e-01	A_33_P3305497	BC110599	TTTCTGTCCCCAGGTTGCCAACCATGTGGTACAGGCGTTGCTGAACCAGAAGGTGAGTAA
A_33_P3334630	0.4703	0.0305342	-2.33	-3.5237	-0.358	A_33_P3334630	NM_001128834	CTGAAAACCTCACATGCATACATACACATATATACACACACAAAGAGAGTTAATCAACTG
A_23_P412562	0.4704	0.0305593	2.33	-3.5244	5.53e-01	A_23_P412562	NM_174896	GAGCAATCACTTGGCTGAGAACCATTCTGCAGACTTTGACCCCATTGTCTATGCTCAAAT
A_33_P3322211	0.4708	0.0306003	2.33	-3.5255	1.71e-01	A_33_P3322211		GAAGCGTCTGACGTGGGCAGTGACCGTGACTCACAGAGACATGAAAAGTACAAAATGTGA
A_23_P407112	0.4709	0.0306243	2.33	-3.5261	4.30e-01	A_23_P407112	NM_145263	ACTTGCTGTTTCTTCAGTTTCTAATTTGAGCTGTAACTACACAAGGAAAGCTAAATAGTC
A_33_P3255274	0.4712	0.0306692	2.33	-3.5273	2.26e-01	A_33_P3255274	NM_017623	CCTGGGATGTTTCCAGTTTGGGGCTATTCCAAATAAAGCTGCTACGACTATTCATGTACA
A_23_P217570	0.4712	0.0306838	-2.33	-3.5277	-0.614	A_23_P217570	NM_014289	GTAGTACTTAGCCTACCTAGACCAGCAAGCATTCATTTTTAGCTCGCTCATTTTTTACCA
A_24_P810697	0.4712	0.0307035	-2.33	-3.5282	-0.388	A_24_P810697	NM_001008529	CTGCACACCTTAGATAAAAAGAACATTTTAAAAGCAGAGTTCACTTTCACTCCAGTCTCC
A_33_P3293785	0.4712	0.0307117	2.33	-3.5284	2.90e-01	A_33_P3293785	NM_198696	GGCCTCTCCTCAGGCCAGAAGTCCAGCTGCTGACGGGCAGGTCCCGTTTCTCCAGAGTTG
A_24_P598406	0.4714	0.0307425	2.33	-3.5293	1.84e-01	A_24_P598406	NR_023384	TTTTTATTCCTTAGCCAGTGTACCTCCTACCTCAGAGTCTATGTGAGAGGAAGAGAATGT
A_23_P121545	0.4715	0.0307603	-2.33	-3.5297	-0.186	A_23_P121545	NM_201591	AAGTTCTTGTAGTAGGTAGGGGGTACTACTAGGGATATCTGTGGCATGATTATGCATTCC
A_24_P706953	0.4715	0.0307807	-2.33	-3.5303	-0.359	A_24_P706953	NM_001085429	TCAGTACAACGGGATGGATTTCTTGTTCCTAAGTGTTAAATGATCACATACATAAAAGAG
A_33_P3238777	0.4715	0.0307959	2.33	-3.5307	5.50e-01	A_33_P3238777	NR_028324	AGCGGACTCTCCACGCCCAGCTAGCTCTCGCCTCACTGCGGCCTCCCGAGTCCAAAGCTC
A_33_P3214303	0.4719	0.030839	2.33	-3.5318	2.30e-01	A_33_P3214303	NM_001244808	TGTGTGTGTGCGCGCGTGCGTGTGTGTTAATCTGTTTTTTGATACATTCCTATCCCTTGT
A_33_P3328559	0.4722	0.0308759	2.33	-3.5328	6.48e-01	A_33_P3328559	NM_198517	GGAAGGGGTTGGCTGAGTCAAGGGACCCCAGAGGGCACCAGGAATAAAATCTTCTTGAAC
A_33_P3365621	0.4722	0.0308939	-2.33	-3.5333	-0.254	A_33_P3365621	NM_001005285	TTTACACGCTGAGAAACAGGGATGTAAAGGCAGCCATCACCAAAATCATGTCTCAAGACC
A_33_P3275000	0.4725	0.0309273	2.33	-3.5342	1.43e-01	A_33_P3275000	NM_001083621	TCTAGAAAATGAAGGTGTCTTCTCAGATGCACTCATGGTTACCCAGGATGTTTTAAAAAA
A_23_P5568	0.4729	0.0309747	-2.33	-3.5354	-0.167	A_23_P5568	NM_032740	AGAAGGTATGAGCCTAACATTCTGATGAGTCCAGAAAACTACGTTTTGTCAGTAGCAATA
A_24_P916378	0.4729	0.0309937	2.33	-3.5359	1.37e-01	A_24_P916378	BC008217	TATATTGGTCTGATTTCCCTTAAGGTTTCAGTTGTAGAATTTAAGACTTTCCACTAACGG
A_24_P68019	0.4729	0.0310016	2.33	-3.5361	2.21e-01	A_24_P68019	NM_138347	GATGGAATGACTCTTCTAAAAGTTCATCTACAAATTTTCCAGTGAATATGGTTGTGTAGG
A_33_P3357232	0.4731	0.0310494	-2.33	-3.5374	-0.208	A_33_P3357232		TTCAGAAGGAACAACTGTCAGAAGGAACAACGGTACTGTCACCGCTTATCTTCAGTGACA
A_23_P87591	0.4731	0.0310525	-2.33	-3.5375	-0.255	A_23_P87591	NM_006530	TAAACTGAAAATAAGGTGGGCTTCACTGGAGAAATGGACTTACTGCAAATGCTGTGATGT
A_33_P3315385	0.4733	0.0310792	-2.33	-3.5382	-0.397	A_33_P3315385	NM_001584	GCACAAAATATTGTCGCTAATAGTCATTTCTGTTTTCCCATTGTAAATGCTGTTGAGCTT
A_33_P3312194	0.4733	0.0310976	2.33	-3.5387	1.84e-01	A_33_P3312194		GTTGGGGGGGACTCGAAACGATCTCAGTCCCTGGAGGTGACGGAACCATCTGCCGACACT
A_24_P324563	0.4733	0.0311108	2.33	-3.539	2.63e-01	A_24_P324563	NM_031213	CCCGACACCAAGAAGACCTACTGCTTCGACGCCTTCCCTAACATCGAGAAGGTGTCCAAG
A_33_P3229380	0.4734	0.0311388	2.33	-3.5398	5.04e-01	A_33_P3229380	NR_029401	AGCTTGTGCTGCCCGTCTCGAATGACTGGAGTTTCCTGCTTCTGTCACTACACCTCCCAC
A_23_P209904	0.4735	0.0311561	2.33	-3.5402	5.42e-01	A_23_P209904	NM_002081	AGGTCCCCGGTTGCTGGTCAGGTCCCCATGGCTTGTTCTCTGGAACCTGACTTTAGATGT
A_23_P96041	0.4752	0.0313035	2.32	-3.5441	2.77e-01	A_23_P96041	NM_032227	TCTTGGGGCATTTTGTAATGTGTTTTCTCTGTCTTGTAAAACCTTTTGATTGTACCGAAA
A_33_P3344579	0.4752	0.0313276	2.32	-3.5447	1.68e-01	A_33_P3344579	NM_000108	CGGTATCATGTGAAGTGCTGTTTATGTAAATCTCAACATATCCCTTACTCAGGGAAAAAA
A_33_P3361257	0.4752	0.0313311	-2.32	-3.5448	-0.194	A_33_P3361257	NM_016391	TAAACGCTTTTACCCAGCAGAGTGGCAAGACTTCCTCGATTCTTTGCAGAAGAGGAAGAT
A_33_P3386723	0.4752	0.0313589	-2.32	-3.5455	-0.169	A_33_P3386723		ATCATGGCAGAAAACTGGGCCCAATATGGCAAGCTGGCTCGGAAGAACCGAGAGGAGCTG
A_32_P174025	0.4752	0.0313807	-2.32	-3.5461	-0.243	A_32_P174025	NM_182704	GCTGGATGATGAGAAGGGCTGAAATGTTGCCAAGTCAGGTCCTTTTCTGATGGTGGCTGG
A_33_P3267248	0.4752	0.0313844	2.32	-3.5462	2.06e-01	A_33_P3267248	NM_182499	AGTTCGTATGAGGTTGTCCATCGAATCCTCAAAGGGAAAATCACTGGTGCTTTGAACTCG
A_33_P3368771	0.4752	0.0313874	2.32	-3.5463	3.13e-01	A_33_P3368771	NR_026991	TTCTTGAAGAAGGACCATGTGAATTTCCTGACAGAGAACGGGGATGGGTTTCTGAAAGCA
A_24_P880043	0.4755	0.0314224	-2.32	-3.5472	-0.137	A_24_P880043	NM_032373	TGTATTTTCTGTTGATCTATGGAATGTTCTGTACAAAGCTGTATAATTGTACTGTTGGGC
A_33_P3252196	0.4765	0.0315081	2.32	-3.5494	1.97e-01	A_33_P3252196	NM_004456	CAGCTGCAAAGTGTTTTGTACCAGTGAATTTTTGCAATAATGCAGTATGGTACATTTTTC
A_33_P3365735	0.4769	0.0315512	-2.32	-3.5505	-0.356	A_33_P3365735	NM_003247	GGTCTATTTGTCTTCTCTCAAGAAATGGTCTATTTCTCAGACCTCAAGTACGAATGCAGA
A_23_P142447	0.477	0.0315705	2.32	-3.551	5.04e-01	A_23_P142447	NM_012335	ATTTCTGTGTGTGTCAAAGGGGACTAACAGCAGAATCTACCTCCCAACTGCCATGTGATT
A_33_P3307402	0.4777	0.0316396	-2.32	-3.5528	-0.302	A_33_P3307402		ACACACATATACATACATATACACACATATACATACACGTACACACACAGACATATATAA
A_23_P61398	0.4784	0.0316995	2.32	-3.5544	2.61e-01	A_23_P61398	NM_001001852	AGCCTGAGCGTTTAATTTATTCAGTACCTGTGTTTGTGTGAATGCGGTGTGTGCAGGCAT
A_33_P3286254	0.4793	0.0317732	-2.32	-3.5563	-0.213	A_33_P3286254	NM_001284	GTGCAGCATTCCTTAATTCCTTCTGCTATATGTCACACAATTGTTATTTAAAGAACCAAG
A_33_P3276153	0.4797	0.0318207	2.31	-3.5575	2.01e-01	A_33_P3276153	NR_027024	TTCATTAGCTCAATATGTGGTTTGCCCCCAAGTGTGCACTTTTTATTACTTTGTAATATG
A_33_P3762918	0.4809	0.0319263	2.31	-3.5602	3.58e-01	A_33_P3762918	NR_039981	GCTCTTGGATATGAGGGTTGGGTGAGTTCCTCTTTTTCTCTTTTAAAATATATGTATGTT
A_33_P3268532	0.4809	0.0319358	2.31	-3.5604	3.48e-01	A_33_P3268532	NM_001018073	GAGATTGTTGGAGGATTAAATAGTGCATAAAAAGGGTTTATCACACTGACAAATACACAG
A_33_P3399045	0.4809	0.0319642	-2.31	-3.5612	-0.244	A_33_P3399045	BC032569	CACTGAACAGAATCTGAGATTTAATAAGCCAAATCAACAATGTGGGAAGTTCGTTTTGTT
A_33_P3378665	0.4809	0.0320126	-2.31	-3.5624	-0.447	A_33_P3378665	NM_152332	CTCTGATACTAATGTACTCAACAGCCAGGTATAAACTATATCTCCTAGTAACATTTTCCA
A_33_P3386591	0.4809	0.0320205	-2.31	-3.5626	-0.299	A_33_P3386591	AK093310	ATCCTAAAACACATCATCCATCCAGCTCAAGCACAAGAAACAGATGTGGAGCCTAACTGA
A_23_P113777	0.4809	0.0320329	-2.31	-3.5629	-0.512	A_23_P113777	NM_004791	TCTGGCTTGGCTCAGAATATCCTTAACAATTACATGAGAGAGGTCTGGATTCTTATTTTT
A_33_P3285824	0.4809	0.0320338	-2.31	-3.5629	-0.299	A_33_P3285824	NM_001170330	CCTCTGGCTTTTCATCCTTTTCGATGTGGTGGTGTTTCTCTTTGTGTATTTTTTGCCATG
A_23_P92012	0.4809	0.0320485	2.31	-3.5633	2.41e-01	A_23_P92012	NM_025265	AAGCACTTTCATACGCAGGCATCTCTTGTTACCTACATCTAAGCTGTTCCCGAAAGAGTG
A_33_P3272948	0.4809	0.0320492	2.31	-3.5633	1.91e-01	A_33_P3272948	NM_001145536	TCTGAGGCTGTGTACTATCAGTATCTGTCTCCTAAACCAATTATGCTGTGCCTGGGAACG
A_33_P3353672	0.4817	0.0321304	-2.31	-3.5654	-0.195	A_33_P3353672	NM_004249	TAAGAGTACTCCCGAGAATGAGTTATGACATTGTGGATCAGACTGTACCTGATGTTCAGA
A_23_P95060	0.4817	0.0321357	-2.31	-3.5655	-0.253	A_23_P95060	NM_004443	AACTGGAGGAGGGGACTCCAGGAATGGGGAAATGTGACACCACCATCCTGAAGCCAGCTT
A_23_P14716	0.482	0.0321773	-2.31	-3.5666	-0.349	A_23_P14716	NM_031284	TTTCCATTCCGTGTTACAATGACAATATTTAATGAGCATAACCTTCTCAGTCTCCTGCTC
A_33_P3377760	0.4823	0.0322149	2.31	-3.5676	4.23e-01	A_33_P3377760	DA946325	TTCATGGAGCTAAGCCATCAACACCTGGCTGAGAAGTAGGGCCTCTCCACCTTCCTCCCA
A_33_P3392245	0.4826	0.0322506	2.31	-3.5685	1.44e-01	A_33_P3392245	NM_001136123	GTCGGCCTACTCAGGTGTCATTTTGTTATACAATTTCATGTATTCTTAATAGTTTTGCTG
A_33_P3384885	0.4831	0.0323017	2.31	-3.5698	2.17e-01	A_33_P3384885	AK091711	AATGAGAAGGAGACACACAAGTGCTGTTATGACCTGGGTTGTTGGTTGGCAAATACAGCA
A_23_P253412	0.4846	0.0324405	-2.31	-3.5733	-0.226	A_23_P253412	NM_019051	GAAAAGTTTTGAGAGGGCACTGTCAACTTGGGTTTAAGACAGGAGGACATTGCAAGTTCA
A_33_P3421984	0.4846	0.0324894	2.3	-3.5745	3.92e-01	A_33_P3421984	NM_012269	TAGAGTGCAGTGGTGTGATCTCGGCTCACTGCAACCTCTGCCTCCTGGGTTCAAGCGATT
A_23_P114405	0.4846	0.03254	-2.3	-3.5758	-0.191	A_23_P114405	NM_012286	TAAGCTCCTTTTCTCATTTCAAAGTTGCTACCAGTGTATGCAGTAATTAGAACAAAGAAG
A_24_P130865	0.4846	0.0325489	2.3	-3.576	3.20e-01	A_24_P130865	NM_015107	TGATGATGACCCTGCTTTGAAATCTCGACCCAAGAAAAAGAAGAATTCAGATGATGCTCC
A_33_P3340682	0.4846	0.032551	2.3	-3.5761	2.67e-01	A_33_P3340682	NM_001113525	AACAAGTTTGTGCTTAATCTGTCCCAACTAAAATGGAGCTTATAAACTTACTTAGCAAGG
A_23_P42335	0.4846	0.0325568	2.3	-3.5762	3.13e-01	A_23_P42335	NM_021922	GGGTACCAGTGGGCTCAGATGAAGCTCTTGTGCTCATGTATATTATGACCTTCTGTGTTT
A_33_P3326904	0.4846	0.0325608	-2.3	-3.5763	-0.598	A_33_P3326904	AK125166	CCATTGCCTGGGGTTGTTACTGCTGAGATTAAGGGATGCTCGTCCATAGAAAGACTTAGC
A_33_P3294921	0.4846	0.0325671	-2.3	-3.5765	-0.138	A_33_P3294921	NM_015225	AAGGAGCTGTCAGATGGAGAAATAAAAGTGGCCATTAGTACTGTGAGCATGAACCTTGAG
A_33_P3341616	0.4846	0.0325865	2.3	-3.5769	3.05e-01	A_33_P3341616	NR_003945	ACTGCCACACAGGAATCCAGGGGAAACATCATGAAGATATCAGATGTAAAATCCCGAGTT
A_33_P3252605	0.4846	0.0326089	-2.3	-3.5775	-0.214	A_33_P3252605	NM_183075	CTAAAAGGACTGTTAATGCTTTTCTCAGACACATTGGCATTTTACAATTTTGCACATGGT
A_33_P3409635	0.4846	0.0326205	2.3	-3.5778	2.12e-01	A_33_P3409635	AK021432	CCTCACAAGGGCTTTGGCTTTGGGATCCCCTACCTGCAGGGCCTGGGTTTTGGAGAATAA
A_33_P3210488	0.4846	0.0326455	-2.3	-3.5784	-0.401	A_33_P3210488	NM_004369	TGTGGTGGAAACGAAAACAAATTTGGATCACAGAAAGAATGTGAAAAGGTTTGCGCTCCT
A_33_P3692766	0.4846	0.0326525	-2.3	-3.5786	-0.597	A_33_P3692766	NR_040105	AAGACAATTTGGGGAGGTTTTATTAAGGTTGTATCCTGAGCACACATTTCTCTTGTTGCC
A_23_P170541	0.4846	0.0326552	-2.3	-3.5787	-0.296	A_23_P170541	NM_173092	CCTGGATTTGCAGGGAGTTGGGGCCACTGAACTCCAAGATAAAGACACCATGAGGGGACT
A_23_P168556	0.4846	0.032734	2.3	-3.5806	2.74e-01	A_23_P168556	NM_004603	TCTTGGTACAACCAGCTGCCCATTTTGTGAAATTTTTATGTAGAATAAACATTTGTATCT
A_23_P147605	0.4846	0.0327491	-2.3	-3.581	-0.283	A_23_P147605	NM_001003676	ACCTTGTCACGCCGTAGCCTGTTAGTCCTCCTAACCTCTTAAGAGCAGTCTCTTCTGAGC
A_24_P280873	0.4846	0.0327591	-2.3	-3.5813	-0.316	A_24_P280873		AATAGATCCTTTAGCACCTTTGGATAAACTCTGCCTTCTAGGTTGTGGCATTTCAGCTGG
A_33_P3389178	0.4846	0.0327679	2.3	-3.5815	2.78e-01	A_33_P3389178	U78169	CTTTGGGCATGTTACTTAACCTCTCTGAGCCTCATTTATTTCATCCATAAAATGGAAATA
A_23_P127915	0.4846	0.0327762	-2.3	-3.5817	-0.21	A_23_P127915	NM_030906	ATGTTTAGGCACAGCTATTTATAGGGGAAAACAAGAGGCCAAATATAGTAATGGAGGTGC
A_33_P3315733	0.4846	0.0328215	2.3	-3.5828	3.30e-01	A_33_P3315733	BC046241	ACTCTCCTGAGATGCCAGTATAGACACAGAACCAAAGCAAAGTGTTTACTAAGTAAAAAA
A_24_P7946	0.4846	0.0328461	2.3	-3.5834	1.86e-01	A_24_P7946	NM_001037126	GATCCAAGATGTTCTACAGATGCTATTAACTGAGTACTTGGATATGAAAAATACTCGTAC
A_23_P76731	0.4846	0.032859	-2.3	-3.5838	-0.264	A_23_P76731	NM_014226	TATATGAATCAAAACAAACGAGCAGGCATTTCTGTGATGTGTTGGGCGTGGTTGGAAGGT
A_33_P3218768	0.4846	0.0328611	2.3	-3.5838	2.13e-01	A_33_P3218768	NM_080599	CATAGTAGATGCTTTCCTACAGCAGTTACCCAACTGTGTCAACCGAGATCTGATAGACAA
A_33_P3359647	0.4846	0.0329007	-2.3	-3.5848	-0.253	A_33_P3359647	NM_182647	TTCACCAGCACCTTCACCCTAACTGCCATGAGTGTGGATCGCTATGTAGCCATCTGCCAC
A_24_P348594	0.4846	0.0329338	-2.3	-3.5856	-0.238	A_24_P348594	NM_006953	AACTGGCCAGTGTGACTTTCGCCACCAACAACCCCACACTTACCACTGTGGCCTTGGAAA
A_33_P3344406	0.4846	0.0329449	2.3	-3.5859	3.42e-01	A_33_P3344406	NM_001145785	AAGACCCAACAGTGACGCCCCCCTCCGCGGTGGGGGCTTGGAGGTGGGCGGCTGGACTCA
A_23_P322845	0.4846	0.032954	2.3	-3.5861	2.08e-01	A_23_P322845	NM_001102559	AGATGACTGTTTCTACCTCATTTGACCATAACTGTACTTGTGAGCTTCTTTCCTTCCATT
A_23_P44363	0.4846	0.0329733	2.3	-3.5866	3.71e-01	A_23_P44363	NM_020753	GCAGAGAGAAATGCATATATTTTAAATGGAATTTATTCTATCAACTGCCTGAGAGGACAC
A_33_P3219260	0.4846	0.0329813	-2.3	-3.5868	-0.303	A_33_P3219260	NM_016484	TGCATTACCCAAACCATATTGCACTTTTAGTTCCCTAGTTTTCTAGGTGAGCTTCATTCC
A_23_P4387	0.4846	0.0329848	-2.3	-3.5869	-0.281	A_23_P4387	NM_019016	AGTTGGTGGATGGCAAGGTTGTCTCGTCTCAAGTCAGCAGTATTTCTGAGGTGAAAGTTA
A_23_P118025	0.4846	0.0330047	2.3	-3.5874	5.08e-01	A_23_P118025	NM_022355	CGACCTCTCACGTCTGCGTCAGAGACAGAGTCTGACTTCAGGCCAGGAACTCACTGAGAT
A_23_P250813	0.4846	0.0330435	-2.3	-3.5883	-0.162	A_23_P250813	NM_000553	GCAATTCATGTAGTTTCTGGGTCTTCTGGGAGCCTACGTGAGTACATCACCTAACAGAAT
A_33_P3267375	0.4846	0.0330438	-2.3	-3.5883	-0.313	A_33_P3267375	NM_000337	TAGATACCTAAGGGGAAAATATAGAAAGCCTGCCTGAATAATAGAATCTAGAACAACAAC
A_23_P37005	0.4846	0.0330485	2.3	-3.5885	1.61e-01	A_23_P37005	NM_004294	ACCCAGGATAGAGTCAGTGACCACAGGATAGCATATGAAGTTCGTGATATTAAGGAATTT
A_24_P215628	0.4846	0.0330801	2.3	-3.5892	2.27e-01	A_24_P215628	NM_001014283	GTCTAATACAATAAAAACTGGCATTAATACAAACCTCAAAAACGTGAGCGTATCTTCCAG
A_24_P299685	0.4846	0.0330902	-2.3	-3.5895	-0.434	A_24_P299685	NM_198389	GAATCATAGTTGGGGTCTTACTAGCCATCGGCTTCATTGGTGGAATCATCGTTGTGGTTA
A_33_P3280040	0.4846	0.0330923	2.3	-3.5895	2.26e-01	A_33_P3280040	AK125549	CGTGGATGTTTCTTTGGAACAAGGGGAAAAATTATGATTTTCTTATTTTGCTTTGACCTG
A_33_P3240757	0.4846	0.033098	-2.3	-3.5897	-0.209	A_33_P3240757	NM_001542	TATCCTGAAGACCACCCACAACTCCGCCTTCGAATACGGTACTTACGTGGAGGAGGAGGG
A_33_P3367247	0.4846	0.0331054	2.3	-3.5899	2.14e-01	A_33_P3367247	NM_001114395	GGTTTACCCAAGTATTTAGGTGTGCTAACTGACTCAGCAGCAATAATTTAATCTACTAAT
A_23_P136232	0.4846	0.0331493	-2.29	-3.5909	-0.338	A_23_P136232	NM_017813	GTGTTGTTTTGTTTTTATAAAGAAAAGTGTGTTTGTACCCATGAGTTCAGCATTTCTGCC
A_33_P3385750	0.4846	0.0331494	2.29	-3.5909	2.66e-01	A_33_P3385750	NM_001013659	GTGGAGAAGGGTAATAAGTTTTCTGAATACCTTTGCATTGTCTTGTTCACATATATTGCT
A_33_P3371999	0.4846	0.0331543	-2.29	-3.5911	-0.391	A_33_P3371999	NM_007030	GCTGTCGTTAACATTGTGTGTCAAGTTGGTAAAGTGACAAATAAAGGTGTTAAAACATGG
A_23_P132595	0.4846	0.0331582	2.29	-3.5912	2.18e-01	A_23_P132595	NM_014667	TCTGCATTCATAGCCACGAGTTTGTTATTGCTACAGGCTACTGAGCGTCGTAACAGGAAA
A_23_P24884	0.4846	0.0331827	-2.29	-3.5918	-0.28	A_23_P24884	NM_005418	TCTATTTTTTGCTGGTAGTCCGCATACCCATACCCTCTGTTTTTGAAAGGCAAAGGCCAA
A_33_P3342663	0.4846	0.0331849	-2.29	-3.5918	-0.183	A_33_P3342663	NM_153202	GCACCGAAACTTGAACCACACCAAACAGCGTCTCCTGGAAGTCGCCAACTACGTGGACCA
A_23_P369994	0.4846	0.0331953	-2.29	-3.5921	-0.416	A_23_P369994	NM_004734	AAATGTTTTTACCGTAGCCCTCATCTAACTTACACGTGGTGCATATTAAAATAAGCAGAG
A_23_P37327	0.4846	0.0331985	2.29	-3.5922	1.80e-01	A_23_P37327	NM_005050	AATCAGTTAAATTGTGCAGCAATAGATTTTTAACTTTAACTGACCATTTAAGTTTTTTAA
A_23_P503182	0.4848	0.0332594	2.29	-3.5937	1.51e-01	A_23_P503182	NM_021962	GCTGCCAGTTTCTGCTGATACACAGGTAGGATGGGACCCTTCATGAATATCTGACTTTAA
A_23_P382199	0.4848	0.0332754	-2.29	-3.594	-0.157	A_23_P382199	NM_003574	TAGGCTTTGCCTTTAATGATCTCTTACGGTTAGAAAACACAATAAAAACAAACTGTTCGG
A_33_P3767927	0.4848	0.0332967	-2.29	-3.5946	-0.231	A_33_P3767927	NM_001018077	GTGAAAATGGGTTGGTGCTTCTAACCTGATGGCACTTAGCTATCAGAAGACCACAAAAAT
A_33_P3309039	0.4848	0.0333226	2.29	-3.5952	1.92e-01	A_33_P3309039	NM_024811	GGTGATTTGTTTGTCTTTCTGATAGGTTGAAAATTGTGTAATAAACTTGATGACGCTGTC
A_23_P149852	0.4848	0.033326	2.29	-3.5953	4.24e-01	A_23_P149852	NM_032429	ACTTGGAGGAGCAAGATCAGACCGCTCAAAGGTCCCCGTGTTCACTGTTACCCAGAGGCT
A_23_P383009	0.4848	0.0333359	-2.29	-3.5955	-0.31	A_23_P383009	NM_000599	CCACAGTACATATTACTGTAGTTCTCTATAGTTTTACATACATTCATACCATAACTCTGT
A_23_P360302	0.4848	0.0333562	-2.29	-3.596	-0.311	A_23_P360302	NM_001522	ATGTTGGAGCAATATTCTAGCAACTTGGAAGATTTGATTCGGGAGCGGACTGAAGAGCTG
A_33_P3235990	0.4848	0.0333568	-2.29	-3.596	-0.468	A_33_P3235990	NM_007039	GCATGTTTGGCGTCATTCCTAAGAGCCATGTAATTTTAAACTTTTAATTGCAGTTAGTGA
A_33_P3228355	0.4848	0.033366	2.29	-3.5963	5.13e-01	A_33_P3228355	NM_001007253	CAAAAATATCCAAACAGCCATAGAGGCTCTTGTGGACAGACGGACTACCACACGACTAAT
A_33_P3222348	0.4848	0.0334104	-2.29	-3.5974	-0.64	A_33_P3222348	AK124642	AATATTTTAAACAAAACTCTGCCCAACCTTTGGCCTAGCAATTCCACTTCTGGGAATCTC
A_33_P3248863	0.4848	0.0334118	-2.29	-3.5974	-0.608	A_33_P3248863	NM_213597	TACTGAAAATATAGAAATTGGCCAGGCTTGGAGCTGTGTGCCTGTAATCCCAGCTAACCA
A_33_P3297020	0.4848	0.0334154	2.29	-3.5975	3.50e-01	A_33_P3297020	NR_026816	GCAGTGCTCTGTGAAGGGTCTTGACATTGCACTGTAATAATAAAGGTGTGTGTGAAGTAT
A_33_P3260016	0.4848	0.0334366	-2.29	-3.598	-0.146	A_33_P3260016	NM_152905	GTACCTTTGTATAGCTCTTCTGCCCCATTTTGACTTCTGAGATGAAAGTATTTACTAAAA
A_23_P39766	0.485	0.0334723	2.29	-3.5989	2.95e-01	A_23_P39766	NM_014905	TTCAGTGTTACTGGAGTTTTCTTCATTGTGCACACAGGACAAATCTGATCTCTTTGGGAA
A_23_P47991	0.485	0.0334909	-2.29	-3.5993	-0.33	A_23_P47991	NM_015335	AAATGGGGAGGGGAAAAGGGTGGGATTGTCCAGCATGCTTGTATGTATATTTCAGAACCT
A_33_P3229512	0.485	0.0335003	-2.29	-3.5996	-0.302	A_33_P3229512		TTTGAAACTGTACGAGGGTCAGGAAGAAGGCTGCGGGGATGAATGGCTCTACCGGCTTGC
A_24_P299423	0.485	0.0335298	2.29	-3.6003	1.57e-01	A_24_P299423	BC040272	AGAACACAAGCCTTTTTGACTCTAGGACTCATACTCTTAACTATTACTCCAAAGTGATAA
A_33_P3281363	0.485	0.0335524	2.29	-3.6008	2.49e-01	A_33_P3281363	BC037956	CAGGACATCTTAATTAAAGAACAGTTTCAACGGCACAAGAAATTTGTCAAAAGCCACATA
A_23_P406071	0.485	0.0335525	2.29	-3.6008	1.63e-01	A_23_P406071	AK097098	ATAAAAAACCGAAATAGCTTCACATCAGAACTCAGACTAACCTTGTGGTTTCAACGCGCA
A_33_P3401902	0.485	0.0335699	2.29	-3.6012	7.29e-01	A_33_P3401902	NM_001012421	GAAAGGTTGGGAAAACGTATCCTCAGCAATTTCCCAAGAAACTGAAGAAAGAGCATGATA
A_23_P27584	0.485	0.0335828	-2.29	-3.6016	-0.388	A_23_P27584	NM_001020818	TTTTTTAAATCCTTGGAGCTTCTGGTTCCTATCAGTTCCTGTTGTTAATCGTAGAACCGT
A_33_P3291871	0.4859	0.0336821	2.29	-3.604	1.47e-01	A_33_P3291871		TCTGTCATTGTTCAGGTTGCCACTATGTAACCCACATGGACCTAGGGAAACTGAACAAAG
A_33_P3294868	0.4859	0.0337215	-2.29	-3.6049	-0.144	A_33_P3294868	NR_024359	ATGAACTTCCCCTACTTCTACATCGTGGCCTCGGTGATGCTTAACGTCCGCCTGCAGGTG
A_33_P3282384	0.4859	0.0337392	2.29	-3.6054	2.60e-01	A_33_P3282384	AK299336	TTTACCCAGAATGATGTACAGAACCGTGACATGCCTATGGATATCTCAGCTCTGTCCTCT
A_33_P3319880	0.4859	0.0337541	-2.29	-3.6057	-0.213	A_33_P3319880	NM_001166136	AGCCTTAGATGGCAAACTGCGAGGAGATCTGATAAGCAGAGGATTAGAAAAGATGCTGTG
A_23_P87238	0.4859	0.0337904	2.29	-3.6066	5.50e-01	A_23_P87238	NM_006512	GATATCCAATCACCAAAATTCAAACAGATATCTCTATGCTCGGGGAAACTATGATGCTGC
A_24_P313993	0.4859	0.033793	2.29	-3.6067	2.91e-01	A_24_P313993	NM_004058	ACTACTACAGCGGCGTGAGTGCCTCCATGAACACGGATGAGGAGTTCGTGGCCATGATGA
A_33_P3415199	0.4859	0.0337971	-2.29	-3.6068	-0.294	A_33_P3415199	AK123118	CGTCGCACTCTCTGGGTATGTCTCAAGGTGTGGATAATGCAGACTTCTGAGTTTAAAAAA
A_33_P3306163	0.4859	0.0338022	2.29	-3.6069	3.14e-01	A_33_P3306163	NM_001177388	GCCAAGTGCCACCGGAGCCTACCCTGCCACTGGCCCCTATGGCGCCCCTGCTGGGCCACT
A_33_P3300262	0.4859	0.0338167	-2.29	-3.6072	-0.307	A_33_P3300262	NM_001177972	TTATTGTATCTCCAGAGGTGTTTTGATTTCCCACACAAAGAGAAACTGTGAGTCGCTTTA
A_24_P418152	0.4859	0.0338283	-2.28	-3.6075	-0.291	A_24_P418152	NR_034161	TTGGCAACTGTCACCTTCTGGTGAGATTTACAATTGCACTGCTACAACTGCTTGTGGCAT
A_33_P3383611	0.4859	0.0338517	-2.28	-3.6081	-0.571	A_33_P3383611	NM_199349	CAAAAAATTTAAAATCAGCTGGTCGTGGTGCCTCTTGTAGTTCCATCTACTCCGGAGGCT
A_23_P158997	0.4859	0.0338729	2.28	-3.6086	2.36e-01	A_23_P158997		CTTGTTCAAGCCTTTCAAACCATAAGAGAATTCATACAAGAGAGAAATGCTACAAATCTG
A_33_P3367550	0.4859	0.0338741	2.28	-3.6086	1.37e-01	A_33_P3367550	NR_033379	GCCCTCTGGGTTTTCAAAACAAATTGTTTTTACAATACCTATAGTAGTTATCTAGGGCAT
A_33_P3270084	0.4859	0.033886	2.28	-3.6089	5.09e-01	A_33_P3270084		GTGGTGGTAGCTTGTTTGTTTAAAAACATTTCCCCAAATTCACCTTTATGGTTTATCTCA
A_33_P3237927	0.4859	0.0339203	2.28	-3.6097	3.92e-01	A_33_P3237927	NM_001164741	ACCCTTGCTCAGATGCCTGGCAGGGCTGGGTGGCGATTCATAAAGACCTCGTGTTGATTC
A_33_P3494109	0.4859	0.0339203	-2.28	-3.6097	-0.287	A_33_P3494109	AK057377	CTTCACAGTAATGGGATTGCTGGGTCAAATGGTAATTATCCTTATGATTTTCTTAATACC
A_33_P3227231	0.4865	0.0339936	2.28	-3.6115	2.24e-01	A_33_P3227231	AK303492	ATTCCTGATCCTGTTTCCTGTTTATTTCATGAACTTGTCTGTAGGCAGCATGGTGCTGGG
A_23_P381102	0.4865	0.0340006	-2.28	-3.6117	-0.206	A_23_P381102	NM_207310	GGCTAAATTCCAAGATAGATAACACTCAAGATAGATAAAGTACTTGATCTCCAAACTGAC
A_23_P317244	0.4865	0.0340571	-2.28	-3.613	-0.222	A_23_P317244	NM_173847	CAGCAACCTCACCCCGAACGTCCCCAACGTGTGCCGGATGTACTGCTCAGATTTGTTGAA
A_33_P3404759	0.4865	0.0340934	2.28	-3.6139	1.97e-01	A_33_P3404759		GTCAAAAGTATGACCTCAGCTCATGGCTCTGCTTCAGGTAAATTGGATCCAGATTTCTAA
A_33_P3419339	0.4865	0.0341059	2.28	-3.6142	2.93e-01	A_33_P3419339	NM_006496	GCTGTATTGCAGTCATATATAAGGTAAAGTCAGTCTCTTGTTCCTATTAAAAAGCTACCA
A_23_P69497	0.4865	0.0341157	-2.28	-3.6144	-0.179	A_23_P69497	NM_003278	TCCTCTCCGTGCGCTTGGAGCCTCTTTTTGCAAATAAAGTTGGTGCAGCTTCGCGGAGAG
A_33_P3247571	0.4865	0.034122	-2.28	-3.6146	-0.187	A_33_P3247571	NM_139208	ATTACCTTCCGCTCCGACTACTCCAACGAGAAGCCGTTCACGGGGTTCGAGGCCTTCTAT
A_23_P16523	0.4865	0.0341229	2.28	-3.6146	5.20e-01	A_23_P16523	NM_004864	TATTGGGGTGACCTTCTTGGGGACTCGGGGGCTGGTCTGATGGAACTGTGTATTTATTTA
[truncated: 8,846 more rows]

## Sheet: Table SIII
Table SIII. FPKM file of the TCGA-KIRC queue.
Ensembl_ID	TCGA-CW-5584-01A	TCGA-CZ-5984-01A	TCGA-B0-4841-01A	TCGA-B0-4700-01A	TCGA-CJ-4905-01A	TCGA-A3-3376-01A	TCGA-A3-3382-01A	TCGA-DV-A4VZ-01A	TCGA-B8-A8YJ-01A	TCGA-B0-4690-01A	TCGA-B4-5836-01A	TCGA-CZ-5985-01A	TCGA-BP-4991-01A	TCGA-BP-5184-01A	TCGA-BP-4795-01A	TCGA-B0-4707-01A	TCGA-CZ-4854-01A	TCGA-B2-5635-01A	TCGA-B0-5698-01A	TCGA-BP-4762-01A	TCGA-B4-5834-01A	TCGA-BP-5195-01A	TCGA-B0-5108-01A	TCGA-B0-5703-01A	TCGA-B8-5165-01A	TCGA-CZ-5984-11A	TCGA-BP-4995-01A	TCGA-AK-3456-01A	TCGA-CZ-5989-01A	TCGA-AK-3440-01A	TCGA-CZ-4858-01A	TCGA-B8-5552-11A	TCGA-B2-5633-01A	TCGA-BP-5169-01A	TCGA-CZ-5465-11A	TCGA-CZ-5454-11A	TCGA-B8-5546-01A	TCGA-B0-5699-11A	TCGA-CW-6088-11A	TCGA-CW-6088-01A	TCGA-BP-4164-01A	TCGA-BP-4174-01A	TCGA-CJ-4871-01A	TCGA-B0-4700-11A	TCGA-BP-4973-01A	TCGA-BP-4807-01A	TCGA-CJ-5683-01A	TCGA-BP-4989-01A	TCGA-DV-5573-01A
ENSG00000000003.15	3.69443	4.53766	2.83873	3.468	3.5005	3.17809	4.41499	3.7823	3.08062	3.55022	3.66941	4.08018	3.4838	3.81854	3.67214	2.93951	4.4646	3.44568	3.21341	3.78829	3.99372	3.6984	3.09569	3.44545	3.83405	4.2673	3.69301	4.38835	4.32231	3.51226	1.37551	4.84685	4.09456	2.59548	5.50232	5.33081	4.47367	4.33915	5.41767	3.54009	3.77846	3.36995	3.97438	3.92285	3.58496	4.13182	3.74101	2.26412	3.88556
ENSG00000000005.6	0.522658	0.243182	1.08644	0.230203	0.403813	0.204266	0.418568	0.0209111	0.166715	0.0659858	0.0936954	3.83131	0.152768	0.0626744	0.172744	0.0540844	1.57821	0.0544318	0.227002	0.943059	0.425889	0.0859685	0.0163537	0.103665	1.38344	1.37796	1.69225	0.297837	0.936515	0.0483757	0	0.015783	0.116964	0.0385767	0.593019	1.24196	0.234379	0.761285	0.59474	0.171079	0.0536674	0.0554733	0.349026	0.703012	2.02779	0.126312	0.517729	0.0423642	2.06588
ENSG00000000419.13	4.06743	4.68802	3.45425	4.57448	4.10568	4.17486	4.64678	4.6861	4.5425	4.98755	4.55086	4.55374	4.29136	4.38903	4.42356	4.32338	4.86666	4.71642	4.34252	4.42982	4.43387	4.19416	4.39057	4.11546	4.17241	4.40093	4.47513	4.26505	5.73998	5.37694	4.74119	5.32675	5.02293	3.51817	4.72502	4.6114	4.41495	4.30239	4.43765	4.41629	4.84874	4.35435	4.52756	4.1328	4.19447	4.27203	4.23779	4.11485	4.60682
ENSG00000000457.14	1.14235	1.26969	0.924784	1.22355	1.43669	1.7835	1.7389	1.25761	1.28202	1.53421	1.47649	1.56125	1.52542	1.32112	1.4321	1.15127	1.46921	1.73935	1.1111	1.29025	1.57512	1.1165	1.46336	1.14209	1.4619	1.61447	1.24702	1.33965	1.84663	1.09004	1.2532	1.8532	1.88544	1.04026	1.93187	1.83346	1.48094	1.49324	1.90396	1.75228	1.44832	1.61212	1.12353	1.48507	1.4829	1.37111	1.16047	1.36065	1.44673
ENSG00000000460.17	0.651683	0.802483	0.286763	0.664938	0.702214	0.896001	0.920751	0.354001	0.726831	1.20977	0.788686	0.856069	0.83649	0.532666	0.570463	0.647913	0.839073	0.899369	0.433173	0.81106	0.64321	0.581303	0.754203	0.578504	0.691534	0.421048	0.59827	0.524465	1.05748	0.347892	1.29672	1.21723	0.993783	0.354452	0.695727	0.482745	0.633199	0.377401	0.587365	0.768671	0.788268	0.787432	0.575893	0.354678	0.814591	0.653794	0.699285	0.684819	0.824727
ENSG00000000938.13	2.89801	2.40993	2.554	2.7901	2.54752	3.70664	2.31069	1.214	3.39193	2.89282	2.91802	3.51205	2.85776	2.99614	2.6141	1.30801	2.26972	3.09651	3.72457	2.1896	2.4197	2.79753	3.47177	2.41359	2.2168	1.25761	2.39449	2.24169	1.60602	1.10178	2.11863	2.22999	2.39247	2.66118	1.16717	1.80409	1.05977	1.39605	1.6707	2.68755	2.34531	2.25761	2.20902	1.05047	3.18117	2.04124	2.44501	4.00551	3.3891
ENSG00000000971.16	2.2097	4.53199	2.44178	4.90338	4.26807	4.52828	4.15553	2.74971	6.23289	5.19475	4.16919	2.47871	2.78235	3.18899	4.55794	3.19709	4.56271	4.51962	1.72879	4.195	3.44118	4.18562	4.74887	1.98171	3.80344	3.60338	1.41948	3.32236	3.18035	0.184852	4.17572	4.0117	5.55253	4.38379	1.38504	2.51642	0.644779	3.00241	2.10688	2.78745	1.69849	5.66344	5.06785	3.20544	1.50228	3.14017	2.54127	3.21243	2.77233
ENSG00000001036.14	4.06625	4.04963	3.81251	4.63825	4.23696	3.67645	3.6296	4.23059	3.81228	4.69046	4.8008	3.93011	4.28971	4.62939	3.74474	3.67954	4.08807	4.26416	4.72582	4.22585	4.05307	4.41626	3.95113	4.91895	4.25471	4.11696	4.08957	5.36718	4.43271	3.8507	4.00833	4.4281	4.3859	4.48389	4.42931	4.1478	5.30408	4.09555	4.24239	4.30905	4.29089	4.53127	4.17904	4.0275	4.51561	4.97312	4.78338	3.98261	4.05329
ENSG00000001084.13	2.17402	2.00321	1.48538	1.92357	2.45473	2.1761	2.36927	1.39309	2.43395	2.54947	2.39767	2.24422	2.46944	2.40133	1.54478	1.6688	1.9257	2.17133	2.36241	2.26069	2.67428	2.08913	1.84828	2.41145	2.25547	2.48584	2.68068	2.99027	3.57599	2.72716	1.55311	2.8481	2.5048	1.87896	2.17817	1.55006	3.25897	2.27283	1.95323	2.83362	2.42143	2.63101	1.79369	2.27047	2.27602	2.5946	2.32115	2.43731	2.419
ENSG00000001167.14	2.7153	2.47402	3.01108	2.7517	3.19476	3.15521	2.56054	2.96888	3.16819	2.88159	2.82812	3.21347	3.64616	2.98154	3.24484	2.16768	2.81989	3.32614	3.31477	3.06456	2.83935	3.017	2.90739	3.21433	3.20461	2.8253	2.89292	3.1631	3.36773	2.39449	2.55336	3.79993	3.52994	2.4344	3.16837	3.51472	3.00416	2.73972	3.22358	3.1013	2.7988	2.83109	2.79973	2.35228	3.11158	3.11198	2.88665	3.11751	3.04052
ENSG00000001460.18	1.53162	1.25314	0.686075	1.09592	1.13593	1.19339	0.764091	0.910042	1.20414	0.723515	1.51253	1.01486	1.16208	1.26879	1.30188	0.644595	1.04502	1.02283	1.24403	1.15885	1.11537	1.19264	0.792772	0.736562	1.16633	1.2976	0.90766	1.18935	0.886745	0.485633	1.59154	1.53272	0.955796	1.03555	1.84	1.93429	1.14555	1.30053	1.78618	1.42078	1.40501	1.24306	1.10642	1.16659	1.27644	1.17255	1.36435	0.728835	1.39116
ENSG00000001461.17	4.07713	3.59922	1.31348	2.6161	3.04553	3.10286	2.67487	2.66923	2.49521	1.88221	3.32053	3.96987	3.87248	3.39148	3.40353	2.45296	3.03643	3.98417	2.81922	3.12709	2.91697	3.68098	2.69968	1.87994	3.43803	3.01544	2.88628	2.5457	3.26584	2.30915	2.23404	3.89235	3.51289	2.44342	4.40047	3.7277	2.26397	3.14346	4.56448	3.96407	3.07591	2.81383	3.24346	2.62352	3.13437	3.6819	2.86047	2.05273	3.39045
ENSG00000001497.18	1.98637	2.29007	1.70691	2.01849	2.28012	2.09397	2.81026	2.22086	2.04201	2.1978	1.89336	2.01728	2.09481	2.10615	2.07073	2.12674	2.65709	2.0192	1.93765	2.15465	2.41935	2.10219	2.17572	2.20627	2.28253	1.80999	2.42798	1.72421	0.973134	2.56591	2.01892	1.66102	1.89815	2.10057	2.15105	2.17482	2.08539	1.81816	2.2122	2.17501	2.47472	2.13044	2.16202	1.77926	2.3551	1.93471	2.41497	2.23063	2.35112
ENSG00000001561.7	4.02955	3.3347	2.38965	2.34619	3.30789	2.9869	3.18369	3.19431	2.73249	3.28451	4.1471	4.12049	3.26455	3.4244	3.40516	1.67464	3.40543	4.42925	3.44902	3.68906	4.23387	3.21805	2.70582	3.58931	3.72351	3.77447	4.09318	3.25644	5.68674	4.42498	2.59948	4.99971	4.26971	1.4049	4.71113	4.13232	2.39928	3.58283	4.30594	4.20148	4.17257	3.88916	3.438	3.28253	3.90624	4.07349	3.49324	2.81926	3.53831
ENSG00000001617.12	5.4247	4.73109	5.4679	4.81501	5.43909	5.25846	5.04839	4.57401	4.88449	3.36828	5.01871	3.93084	5.42916	4.42379	5.19092	2.81254	4.30937	4.76416	5.19085	3.88158	5.37288	4.91707	4.92434	4.22578	4.7142	3.60504	4.76119	1.91016	1.98357	5.25321	2.37657	4.05329	5.04315	3.75796	4.04203	4.08085	2.90259	3.23398	3.99961	5.45322	4.28301	3.66303	4.70234	3.05034	4.80686	4.16938	5.16071	3.62844	4.0244
ENSG00000001626.16	0.0220482	0.0640551	0.0540844	0.0366088	0.744592	0.068602	0.157432	0.288299	0.181548	0.54962	0.121679	0.276199	0.198997	0.0890913	0.113567	0.216238	0.418676	0.105544	0.229342	0.294547	0.0614306	0.0473988	0.0736832	0.0377336	0.674822	1.02396	5.16422	0.140255	0.136585	4.01228	0.0691522	0.79776	0.0484455	0.0258793	0.143524	0.0972062	0.118626	0.304745	0.08882	0.179129	0.207768	0.0494914	0.0922074	0.943884	0.425137	0.157691	0.129745	0.608147	0.584193
ENSG00000001629.10	4.06275	3.63372	2.6288	2.9177	3.6762	3.82989	3.46133	2.4957	3.30056	3.93545	4.11234	3.80189	3.59766	3.72954	3.19809	2.68856	3.55225	4.26516	3.87065	3.93357	3.42365	3.34328	3.15551	3.83449	3.8428	3.7287	3.61858	4.38445	4.99756	2.46866	4.31927	3.97526	4.409	2.37623	3.79253	3.20464	3.56067	3.83425	3.74502	4.26627	4.11983	4.42759	3.22983	3.34908	4.39867	4.03068	4.12913	4.15877	3.76752
ENSG00000001630.17	0.791189	0.504061	0.234133	0.115699	0.554638	0.445303	0.712816	0.212756	1.26849	0.60739	0.423955	0.350497	0.563451	0.361656	0.53834	0.0893626	0.480162	0.866275	0.605115	0.899717	0.410884	0.565305	0.440527	0.865602	0.774081	1.03626	1.02467	0.461738	0	1.28735	0.68446	0.694212	1.15824	0.0640551	0.648005	0.916247	0.445833	1.14352	1.09248	0.745194	0.440421	0.506196	0.510456	0.591967	0.91663	0.86132	0.77484	0.190931	0.402613
ENSG00000001631.16	0.80653	0.978855	0.790355	0.853676	0.831634	1.12981	1.02722	1.06681	1.10279	1.16066	1.00065	0.993855	1.12506	0.883934	0.676087	1.16124	1.32349	1.28942	1.17421	0.646716	0.863463	0.783331	0.883543	1.34136	0.74123	0.984188	0.997618	0.791606	1.72181	1.1818	1.199	0.937796	1.37376	0.879392	0.712552	0.930775	0.851919	0.840201	0.805623	1.04068	1.23511	1.09309	0.557876	0.891808	1.42964	0.703012	1.10152	1.6668	1.09795
ENSG00000002016.18	1.16292	1.49016	1.12022	1.32958	1.15497	1.89972	2.32864	1.42782	1.71765	1.85547	1.36368	1.30065	2.25051	1.40599	0.949647	1.72461	2.3378	2.12879	0.955313	0.840685	1.4444	1.29472	1.8616	1.35991	1.37033	1.25084	1.52221	1.51046	1.17441	0.916018	1.50197	1.33234	1.94825	1.56876	1.86394	1.48021	1.29613	1.20351	1.8427	2.08841	2.19978	1.39731	0.957617	1.55405	2.40335	1.39517	1.30603	2.55778	1.73859
ENSG00000002079.14	0.00776959	0.0103502	0.015783	0.0267293	0.00317044	0.0635029	0.0472592	0.0196308	0.00518438	0.14991	0.0187766	0.0388576	0.0485152	0.00504062	0.0106366	0.0255958	0.0574156	0.028852	0.0284277	0	0.0336521	0.0206267	0.0342157	0.0347792	0.0199154	0.00733905	0.0322419	0.0103502	0.0164963	0.0378742	0.120883	0.0221902	0.0785415	0.0272956	0.0298416	0.0342157	0.0107798	0.00934717	0.0411028	0.0450235	0.0809305	0.0174944	0.0190614	0.00963382	0.117828	0	0.0136409	0.282736	0.0226164
ENSG00000002330.14	3.38311	2.74127	3.368	3.12915	2.37248	2.27268	2.16343	2.45796	2.70454	2.47742	2.85338	2.09785	1.96155	2.76197	2.63752	2.70746	2.62688	2.69664	2.78067	2.89716	2.4466	2.66955	2.18618	3.20916	2.05814	2.64275	1.6968	2.91947	0.0201999	2.43336	3.25647	1.2578	2.36251	3.42907	2.30188	2.35513	3.27404	2.72975	2.19667	2.12819	2.01764	2.71372	2.90781	2.40029	2.16524	2.87604	3.16018	2.21571	2.64145
ENSG00000002549.12	5.29357	3.83433	3.25586	6.21377	4.56205	4.84488	4.95709	3.44416	5.12154	5.72233	5.15629	5.60747	5.16637	4.8997	4.75569	3.52808	4.51013	5.89706	5.11537	4.99582	5.11401	4.87374	5.90038	4.75777	5.19892	4.32064	5.06503	4.7554	5.21442	5.20876	4.6857	4.87199	5.54006	4.04748	4.73013	4.85259	4.42677	5.10863	4.84353	4.85491	4.61137	5.52196	4.90934	5.15881	4.91525	5.12607	4.49734	5.87886	6.0939
ENSG00000002586.20	5.26489	5.39413	5.50699	5.8614	5.42038	5.76155	5.09799	5.36429	5.95395	5.00452	5.09834	5.08016	5.85688	5.64428	5.36073	5.57941	4.96441	4.45334	5.0179	5.47483	5.75673	5.4353	5.66551	5.18122	5.42434	4.1771	4.52098	4.54823	3.56966	2.81375	6.25763	3.85721	5.15274	5.84846	3.04378	3.94623	3.40486	3.83309	3.65295	5.15613	5.00844	4.42655	5.3637	3.88881	5.02924	5.46657	5.11761	4.76486	4.85562
ENSG00000002586.20_PAR_Y	0	0	0	0	0	0	0	0	0	0	0	0	0	0	0	0	0	0	0	0	0	0	0	0	0	0	0	0	0	0	0	0	0	0	0	0	0	0	0	0	0	0	0	0	0	0	0	0	0
ENSG00000002587.10	1.17434	2.18409	1.54087	1.12651	1.05561	1.13632	1.49825	4.72151	1.02623	1.40021	1.40376	1.40969	0.960808	1.05977	1.97141	0.563646	1.28511	1.70403	2.28048	1.52411	0.782241	1.12095	1.36586	1.55395	1.08461	1.32734	1.67188	3.28397	1.35519	1.75365	0.47892	3.92403	1.17594	0.815493	2.3961	2.60184	1.44631	0.89817	1.86718	1.23689	2.11157	1.80314	1.04397	0.655443	1.05846	1.55198	2.22401	2.93983	2.18821
ENSG00000002726.21	2.33488	9.35783	3.71548	4.31438	1.6863	6.34466	3.3572	8.14839	5.14303	4.08102	6.49826	6.73142	5.2415	4.05229	3.29707	8.16064	4.98814	7.34603	6.21242	6.55328	6.44215	2.46438	5.87568	4.65275	5.76051	6.6654	4.09062	0.322274	1.66426	0.116631	0.138552	5.71694	5.70127	4.81271	6.90275	4.63401	1.66116	6.50023	4.90579	5.83207	6.74888	6.37385	2.72977	5.3994	5.67922	6.25164	8.63299	4.89633	7.47475
ENSG00000002745.13	0.00748258	0.0329472	0.0302654	0.124593	0.00619029	0.0563061	0.00848689	0.0468403	0.0297002	0.00762609	0.00733905	0.0137838	0.0441843	0.00963382	0.0274372	0.0247452	0.0556122	0.0701832	0.0411028	0.0751903	0.0130692	0.0199154	0.051024	0	0.0255958	0.135404	0.0156403	0	0.0727232	0.0147838	0.201006	0.104068	0.0194884	0.110764	0.0116388	0.0330882	0.0104934	0.1133	0.00532812	0	0.0606008	0.0419438	0.00748258	0.141694	0.0326651	0	0.00877371	0.244156	0.0518593
ENSG00000002746.15	0.0329472	0.0892269	0	0.122739	0.0187766	0.0900404	0.672471	0.00662118	0.1038	0.733615	0.115033	0.310805	0.0194884	0.204266	0.110631	0.246347	0.363115	0.0146409	0.0193461	0.0739573	0.030548	0.109962	0.0258793	0.444879	0.925316	1.69127	0.0626744	0.451646	0.00748258	0.00345832	0.0560285	0.0284277	0.109895	0.0448837	0.0243197	0.0244615	0.654436	1.91089	0.0137838	0.0132121	0.0173518	0.021764	0.18916	1.57826	0.0619835	0.245861	0.203514	0.0166389	0.350045
ENSG00000002822.15	0.0531113	0.101516	0.0340748	0.183709	0.0683269	0.132774	0.212383	0.0795658	0.174023	0.311736	0.0801119	0.108223	0.090718	0.14509	0.1141	0.14952	0.0958569	0.118758	0.160146	0.10742	0.0668125	0.093425	0.0909889	0.105678	0.0597706	0.0159257	0.0694272	0.0746424	0.00963382	0.00662118	0.0942361	0.0479571	0.134484	0.155231	0.026021	0.0489336	0.152248	0.0561673	0.0617071	0.107152	0.0761486	0.0601858	0.0494914	0.0373119	0.0939658	0.0529723	0.0430645	0.319387	0.158078
ENSG00000002834.18	5.82235	5.03213	4.08655	5.57518	5.5174	5.48503	4.83157	4.24159	5.39322	5.42757	5.15773	5.31338	5.46979	5.83389	5.89165	5.21768	4.88731	5.15754	4.77917	5.68877	5.43632	5.42776	5.36215	5.24363	5.50617	4.91822	4.88328	5.17661	4.11263	3.06476	4.71117	5.52265	5.07273	4.67052	5.17254	4.81136	5.12032	4.73809	4.77359	5.53265	4.84671	4.95322	4.77276	4.44268	5.17239	5.58878	5.30347	5.18007	5.51185
ENSG00000002919.15	2.82153	2.69757	2.89297	3.07248	2.94737	2.99137	2.55653	2.62412	2.86796	2.92128	3.07864	2.54503	2.60907	3.01057	3.10425	3.06048	2.53658	2.74502	2.97056	3.28385	2.7291	2.91004	2.94699	2.72351	2.79485	2.87421	2.75581	2.78123	2.02552	2.68903	2.6248	2.69115	2.68008	2.66492	3.08177	3.22957	2.5708	3.00162	3.03466	3.10719	3.1438	3.29409	2.70823	2.77939	2.66419	3.28539	3.0967	2.94362	3.16305
ENSG00000002933.9	6.9954	8.12658	5.92019	7.60161	7.17376	6.37772	7.7753	7.53815	4.93692	6.53732	7.70634	7.1768	6.51819	7.14866	5.358	7.27637	8.02083	6.95	8.72518	7.22598	6.98214	6.87252	6.2408	8.3424	6.96132	5.96486	6.07684	7.35169	5.13529	0.676719	3.89336	5.18324	5.74488	7.35781	5.444	4.90994	6.68675	5.98902	3.45644	6.4998	7.86683	7.62075	7.13031	5.69503	8.02849	7.48786	8.47382	6.37809	7.22603
ENSG00000003056.8	4.63698	5.10299	2.02648	3.79074	4.65157	4.71468	5.27264	3.62853	4.25277	5.31021	4.82853	5.23468	4.51663	4.32767	4.42329	3.66387	5.00645	4.96036	4.50989	4.98124	4.52756	4.72293	4.82957	4.41638	4.74727	4.21448	4.94468	5.06102	3.97216	5.00026	4.31837	4.96731	5.42793	2.89272	4.74957	4.70394	4.7746	4.03459	4.65661	4.77882	4.65338	5.11958	4.22007	3.93324	4.67857	5.10551	4.14812	4.29301	4.5141
ENSG00000003096.14	1.46764	1.59794	0.385928	0.779974	0.991173	1.03612	1.8	1.69131	0.608242	1.06371	1.652	2.17891	1.21176	1.14274	1.54295	0.627794	1.50457	0.927972	1.06785	1.38681	1.02531	1.21829	1.47654	1.82883	1.57526	3.05111	2.28614	3.48182	1.59024	1.50014	0.169284	3.28989	1.88546	0.556307	3.01221	3.97121	2.37726	2.93463	3.16037	1.30889	1.47737	2.19642	1.69363	2.48303	1.48347	1.31788	1.04117	1.01121	1.67319
ENSG00000003137.8	4.4448	0.664938	2.4734	0.612211	2.13921	1.50828	1.10487	0.426533	3.14004	0.505891	0.834954	0.874443	2.12002	1.25707	2.66998	1.19043	0.555325	1.84657	0.454071	0.592828	0.749062	2.02002	1.73188	2.18717	3.18666	4.00076	1.7058	1.19049	0.200253	0.129217	1.40572	2.65237	0.58164	0.257976	2.0274	1.01407	1.46968	3.19103	2.17377	1.67924	1.15231	1.89363	1.36042	3.51719	1.03224	1.45765	1.33159	2.56247	1.90393
ENSG00000003147.19	1.19881	1.2979	1.99736	1.54117	1.7473	2.47155	1.15381	2.89757	2.37423	1.20239	1.70004	1.48785	2.29113	1.54814	2.55452	0.812786	1.52592	2.37925	1.24373	1.57216	1.96923	1.81787	1.815	0.70496	1.97556	2.53207	2.23539	1.3932	1.48821	4.02615	0.649845	2.68181	2.857	1.19944	2.63622	2.7185	1.81959	2.39284	2.26255	1.91957	1.12895	1.09498	1.34733	2.38126	1.21655	1.07498	1.87299	0.97475	2.29104
ENSG00000003249.15	1.72561	2.72738	1.9123	1.41576	2.2646	1.9779	0.447949	3.24286	0.734309	1.13212	2.26003	3.039	2.65707	3.0696	3.32996	2.91978	1.72299	1.79115	1.60564	2.11683	3.45235	2.25293	1.35975	1.99989	2.77355	1.97812	3.09501	3.2889	0.971516	3.11198	3.38613	1.51253	1.8254	1.01378	2.72955	2.38532	3.02669	2.07042	2.18234	2.73738	2.27888	3.39497	2.53953	2.25017	2.82104	3.33685	3.03378	0.863463	4.31338
ENSG00000003393.15	2.14094	1.91066	1.08093	1.40801	2.17005	2.34466	2.66088	1.51979	2.27548	1.91476	2.13599	2.18995	2.43339	1.85228	2.00328	1.43269	2.2017	2.25385	1.93267	1.95981	1.99353	2.03309	2.04579	1.79136	2.34951	2.2158	1.96447	2.61582	2.18634	1.95758	1.69933	2.40534	2.42503	1.34557	2.36762	2.21633	3.04607	2.12466	2.33751	2.53705	2.35778	2.23045	1.66407	2.03826	2.21583	2.0768	1.7236	2.21956	1.88604
ENSG00000003400.15	2.31092	2.28493	2.07632	2.34772	2.74216	3.16512	2.33945	1.80978	2.71253	2.30182	2.81262	2.69499	3.10079	2.26975	2.83827	2.03002	1.98174	2.57483	2.30501	2.33254	2.52426	2.43824	3.08551	2.02814	2.52802	1.8148	2.04205	1.73959	2.41259	0.723165	1.44249	2.97763	2.75247	2.98333	2.49039	2.57221	1.31377	1.79527	2.75739	2.74218	2.16565	1.6863	2.31203	1.79722	2.36093	2.25017	2.15342	2.76039	2.40705
ENSG00000003402.20	3.14488	3.27746	2.18979	2.85653	3.06316	3.57306	4.02901	3.37833	3.58189	2.87491	3.52494	4.25874	3.66807	3.06069	2.88591	3.65612	3.15217	3.62013	3.65899	2.30445	3.18818	3.15848	3.15793	2.87892	3.1741	2.94731	2.73075	2.52629	4.19934	1.75792	2.20777	3.25308	3.16774	2.78829	3.07829	3.06759	2.39347	2.98362	3.53142	4.0103	3.75952	2.88327	2.47853	2.71556	3.95357	2.71997	2.87525	4.40095	3.51531
ENSG00000003436.16	4.97794	4.9423	3.04838	3.81328	4.45052	4.06761	1.39764	4.05891	3.98451	3.45424	4.71045	4.65832	4.40131	5.46728	3.07907	1.22571	4.72996	4.29643	5.15347	4.49412	5.16285	4.48648	3.93461	4.60958	4.34418	2.70079	4.16008	3.28125	5.45006	0.390558	4.35944	4.73765	4.26034	4.37388	2.98565	3.38694	3.18892	2.89832	3.15353	4.49153	3.85089	3.69216	4.15549	2.9186	4.41785	4.88179	4.7296	3.89919	3.84401
ENSG00000003509.16	1.91579	2.58667	1.57875	1.8536	1.65031	2.06274	2.33219	2.44239	2.05141	2.29316	2.32935	2.58053	2.24692	1.892	1.86068	2.17712	2.28774	2.82938	1.88733	1.89002	2.05669	1.99146	2.14075	1.84579	1.86299	2.20489	1.92513	2.12704	2.269	1.99048	2.24531	1.8242	2.74637	1.84181	2.21921	2.10719	2.60909	2.19692	2.00748	2.17591	2.33828	2.28315	1.85555	2.09261	2.33256	2.05151	1.853	2.38596	2.37192
ENSG00000003756.17	1.78718	1.69817	1.79286	2.21779	2.00676	3.13047	2.70711	3.60325	3.18606	2.57071	2.21226	2.0877	3.10807	2.15445	2.34389	2.28137	2.41973	2.83117	1.98145	1.64178	1.9378	2.10363	2.79873	1.87141	2.06461	2.32981	2.33745	2.49413	1.96953	2.3802	2.08889	2.23729	2.58331	2.36653	2.27011	2.43085	2.43317	1.84036	2.6893	2.59953	2.60597	1.67315	1.58222	2.65853	2.79456	1.68796	1.85619	3.15213	2.65842
ENSG00000003987.14	0.252052	0.772815	0.309642	0.350384	0.285225	0.350045	0.254715	0.401194	0.349479	0.377401	0.308477	0.494569	0.449957	0.328262	0.280481	0.242694	0.49968	0.405012	0.310922	0.225028	0.28629	0.282143	0.143132	0.139469	0.302641	0.354001	0.213627	0.217603	0.998412	0.123799	0.758644	0.596649	0.428893	0.775177	0.291839	0.324004	0.248413	0.530271	0.340847	0.297485	0.241108	0.173639	0.270828	0.496104	0.189666	0.176323	0.267955	0.339023	0.368042
ENSG00000003989.18	2.84075	3.66742	2.37362	2.7646	3.72236	4.00403	5.64466	3.91202	4.72356	4.72238	3.17851	2.6717	3.23519	3.50606	3.59412	3.14843	3.28958	1.99117	2.85836	3.71757	2.85416	3.86462	2.5542	3.11661	4.26478	2.69955	2.54802	0.974382	3.82161	1.26748	5.13422	3.79228	3.18664	1.6596	1.90931	2.64074	1.81217	2.76122	2.75879	3.48765	2.5742	1.21157	3.5856	2.91581	2.66614	2.69232	2.7642	2.01792	2.65361
ENSG00000004059.11	5.34861	5.49857	5.35285	5.86138	5.45309	5.08956	4.8622	5.7458	5.36252	5.53192	5.18768	4.71468	4.8185	5.33056	5.45478	5.03512	5.68416	5.01773	5.76261	5.47188	5.0697	5.4127	4.99444	5.74389	4.89502	4.87376	4.99213	5.10618	2.58549	5.43189	6.42734	4.29638	4.58455	5.70811	5.27611	5.50656	5.1709	4.8803	4.98925	4.87851	5.03451	5.22229	5.5068	4.7213	5.19031	5.25225	5.87523	5.58385	5.41203
ENSG00000004139.14	1.05005	1.03436	0.0870554	0.383165	0.758644	1.01835	0.902344	0.453017	1.00978	0.780982	0.89724	0.932893	1.01564	0.674732	0.980976	1.27787	0.961771	0.946619	0.539035	0.687061	0.547746	0.775514	0.756938	0.547055	0.814181	0.683292	0.553754	0.788602	0.343692	0.22367	1.04138	0.487075	0.873065	0.792855	0.727354	0.722204	0.974823	0.714663	0.730836	0.987757	0.833173	0.791022	0.513491	0.707966	1.05193	0.714399	0.595504	0.724126	0.731618
ENSG00000004142.12	5.89148	5.46602	4.8228	5.57312	5.03728	5.10621	5.15263	4.85071	4.93208	5.66391	5.79116	5.43773	4.88953	5.57944	5.07868	6.17951	5.06992	5.21802	5.68406	5.44273	5.12846	5.47503	5.01144	5.86029	5.36525	6.05494	5.27758	6.00631	3.56385	5.30475	4.94479	4.78868	5.10032	5.55103	6.06286	6.07093	6.38966	6.30655	6.07791	5.34056	5.58095	5.71578	5.25424	6.11163	5.1906	5.61532	5.62519	5.00273	5.59613
ENSG00000004399.13	5.39056	4.31891	4.66636	5.2843	6.52505	6.61069	4.60431	4.1367	6.27198	5.34402	5.22166	3.97561	6.14367	5.46937	5.60683	5.03071	4.45524	4.42127	4.44156	4.93192	5.94442	5.53878	5.75449	4.30187	5.72007	3.58903	4.36217	2.94407	2.47166	1.79805	6.06553	3.44537	5.31335	4.5884	2.99688	3.58264	3.41006	3.61579	3.85204	5.77757	4.03838	3.78185	4.66349	3.1258	4.73011	4.66328	5.10214	4.28687	4.01322
ENSG00000004455.17	3.74356	4.10346	3.30083	4.06457	4.01874	3.74236	4.46573	4.02275	3.26689	4.41193	4.40263	4.39292	3.86318	4.21005	3.51603	3.88049	3.71744	4.21526	4.09079	3.97477	3.93812	3.97275	3.88874	3.13565	4.00219	4.39726	4.00774	3.56931	3.83553	3.82033	3.67246	3.94971	3.98732	3.97552	4.27613	4.45916	3.32743	4.33921	4.293	4.1269	4.35201	4.42935	4.16992	4.12003	4.23288	4.1324	4.83829	3.41328	4.24805
ENSG00000004468.13	0.496309	0.972252	0.0915306	3.01221	0.436908	0.791272	0.738898	0.268315	1.55498	2.42248	0.95017	1.59569	1.05256	0.840282	0.496513	0.685895	1.01999	1.10219	1.17101	1.01685	0.584963	0.438186	1.81508	0.603312	0.731878	0.441696	0.996678	0.607105	1.5009	0.121811	2.2211	0.892896	0.668936	2.37404	0.454808	0.490057	0.324119	0.41045	0.412836	0.846553	0.625832	0.929488	0.462681	0.540622	1.12631	0.693677	0.792272	2.56633	2.32518
ENSG00000004478.8	4.08026	4.5094	3.86625	3.58447	3.96136	3.59814	4.23383	3.68915	3.49899	4.77015	4.09907	3.91299	3.88007	3.82196	4.07723	4.03409	4.7128	3.85954	4.03451	4.14928	3.88908	4.27631	3.7242	4.49736	4.1175	4.76367	4.08786	4.32806	2.69742	4.52217	4.72029	4.53037	4.05548	3.334	5.07555	5.22378	4.75062	4.57772	4.77232	3.42155	3.56837	4.72596	4.15891	4.36013	3.51724	3.83948	4.33208	3.69556	4.37639
ENSG00000004487.17	3.45428	3.49932	2.77452	3.35528	3.65452	3.85173	3.63345	3.67317	3.47423	3.58993	3.59572	3.59766	3.8304	3.49002	3.79873	3.42024	3.48959	3.72802	3.32164	3.57034	3.70226	3.38908	3.62065	2.84505	3.73484	3.7148	3.3598	3.7879	3.17859	3.21258	3.75284	4.24656	4.0894	2.93499	4.45331	4.05145	3.9626	3.52394	4.16425	3.66078	3.57682	3.10477	3.17621	3.38503	3.41082	3.5007	3.5672	2.95782	3.69954
ENSG00000004534.15	1.918	2.24562	2.65453	2.73099	2.55038	3.73604	3.18352	4.45683	4.02004	3.20065	2.37835	2.51869	4.12403	2.43488	3.23372	3.58087	3.45984	3.44993	2.222	1.86699	2.41797	2.68278	3.22973	2.10742	2.64326	2.97304	3.24734	2.83768	2.50157	3.40422	2.52389	3.16258	2.76097	3.95274	2.91942	3.56641	2.69513	2.60516	2.96003	3.07919	3.31635	1.87299	1.78823	3.23446	3.54277	1.87157	2.37281	4.01474	3.08675
ENSG00000004660.15	1.45107	0.692338	1.49431	1.1475	2.07139	2.3171	1.53605	1.69582	2.03305	1.20789	1.72032	0.998629	2.18891	1.81541	1.23499	1.04166	1.20808	2.75813	1.50904	1.18758	2.06378	1.75484	1.83956	1.43146	2.07464	0.732052	1.65026	0.927214	0.712288	0.361207	0.865365	0.854395	1.71984	1.67536	0.703809	1.06667	3.14171	0.657091	1.40092	2.0176	2.24623	1.14084	1.17294	0.647729	2.06643	1.97431	1.44355	1.74537	1.34738
ENSG00000004700.16	3.40779	3.65394	0.561106	2.53384	3.58369	3.45882	3.33089	1.52757	3.36555	4.16626	3.44778	3.66497	3.53911	2.94094	3.26757	1.84085	3.35921	4.26646	2.85256	3.43952	3.40568	3.23796	3.38753	2.92947	3.59037	2.53521	3.22612	3.13226	4.01809	2.29372	3.48379	3.57461	4.47149	2.11417	2.74629	2.5717	2.79031	2.39849	3.01223	3.93381	3.3799	3.56587	2.92378	2.0115	3.39476	3.12077	2.51634	2.5005	3.01872
ENSG00000004766.17	1.78073	1.86029	1.35072	1.42798	1.92155	2.01368	2.11327	1.09248	1.63766	2.18729	2.07916	2.20802	2.04009	1.79643	1.74032	1.38455	2.0895	2.61157	1.9193	1.76854	1.84728	1.74123	1.73427	2.08389	1.95341	2.17967	2.19579	2.10273	2.85732	2.22256	1.72194	2.63626	3.2384	1.24659	2.53735	2.29904	2.05193	2.11323	2.63898	2.36205	2.12426	2.34903	1.69131	1.84004	2.21129	1.94763	1.71141	2.08185	1.83548
ENSG00000004776.13	1.22521	0.132379	1.08556	1.84683	1.14522	1.97067	0.301939	1.18637	4.18392	0.714487	0.983386	0.388134	0.338795	1.62831	4.07072	2.13839	1.03555	0.321928	0.241718	3.20199	0.428571	0.736648	1.18688	1.17766	1.26975	1.59053	0.295841	0.160662	0.0592168	0.401849	0.274053	1.63478	0.579856	1.19528	0.674099	1.49365	0.286408	1.82159	0.67708	1.03752	0.068602	0.329985	1.57638	2.28113	0.222186	1.55243	1.06053	1.41186	1.58501
ENSG00000004777.18	0.803062	1.42862	1.16434	1.48707	1.01692	1.69073	2.16488	2.25196	1.61683	1.46775	1.09532	0.789938	1.86172	0.691445	0.646439	2.20094	2.32415	0.982327	0.790105	0.339708	1.02262	0.484808	1.26051	1.54903	0.458277	0.741143	0.848237	0.599127	0.064607	0.706376	2.09842	0.260628	0.388796	1.9936	0.290188	0.822281	0.244278	0.515006	0.368489	1.27065	2.04058	0.87578	0.581207	1.33205	2.38824	0.424922	1.06888	2.29025	0.930245
ENSG00000004779.10	5.15864	5.39873	4.22478	4.85721	4.29237	4.21192	4.70793	4.6334	4.31219	4.78369	4.95468	4.82068	4.33897	4.52321	4.4888	4.8554	4.70219	5.04263	5.08194	5.00518	5.03642	4.55366	4.37902	4.68071	4.53964	5.08361	5.44201	5.15986	5.1809	6.56732	5.06792	4.39584	4.72984	4.50405	5.1209	5.12456	5.18367	5.25555	4.94676	4.52808	4.8335	6.33166	5.18702	5.00405	4.50585	4.81174	5.06025	4.75992	5.23732
ENSG00000004799.8	6.60828	6.51538	5.49055	5.34859	6.93327	5.65735	8.89709	5.16562	7.63608	3.86135	9.54936	7.29232	7.00947	7.48548	4.15714	7.13654	4.29608	7.65776	5.76171	5.87874	9.67857	6.44281	6.74834	7.81623	7.06232	6.34972	5.26317	2.93621	6.6453	5.53356	2.82611	8.35501	8.28155	8.57855	8.13618	7.46392	7.11619	6.015	5.17298	6.8141	9.0423	4.2901	5.7743	5.55102	7.82625	4.38551	8.52701	7.72089	6.337
ENSG00000004809.14	0.0370307	0.0275787	0.0866479	0.0357647	0.207018	0.0514417	0.0485152	2.50873	0.16543	0.0253123	0.00604663	0.121811	0.405448	0.047678	0.703898	0.0206267	0.188274	0.0468403	0.580049	0.0568609	0.090718	0.0110662	0.0367495	0.370164	0.143263	0	0.0727232	0.0571383	0.0524159	0.00619029	0.0233263	0.0874628	1.60086	0.0292762	0.00963382	0.0119249	0.0514417	0.0150693	0.00446544	0.111699	0.0204844	0.351741	0.00619029	0.00776959	0.0497702	0.172231	0.0363275	0.0321008	0.0219061
ENSG00000004838.14	1.18517	1.18384	0.609944	0.323658	0.346872	0.894372	1.04152	0.715366	0.267116	0.637657	0.593402	0.95002	0.400866	0.61306	0.917164	0.931986	0.966209	2.07006	0.454176	0.855751	0.493237	0.698218	0.468635	0.630126	0.483777	0.59579	0.327917	1.66152	0.212134	0.260026	0.435522	0.618427	1.79961	0.900567	1.11843	1.3729	0.435309	0.797843	1.21946	0.31313	0.51248	1.50604	0.624709	0.702214	0.931456	0.400101	0.633571	0.925696	1.36345
ENSG00000004846.16	0.0210533	0.00230647	0	0.0211954	0.0409625	0.00547185	0.032383	0.00331439	0.0104934	0.106348	0.0127832	0.00733905	0.0731347	0.013498	0.0193461	0	0.0247452	0.00165815	0.0024505	0.0455828	0.00460925	0.00934717	0.0104934	0.00345832	0.0513025	0.0149265	0.0311128	3.71093	0.0112094	0.0156403	0.0132121	0.0100637	0.0088454	0.0124972	0	0.00331439	2.42533	0.0127832	0	0.0330882	0.0258793	0.0267293	0.453333	0.0163537	0.013498	0.031254	0.0123541	0.0294175	0.0306892
ENSG00000004848.8	0.0156403	0.152119	0.0316775	0.0622599	0.0257376	0.00547185	0.102457	0.00992041	0.041243	0.0777899	0.0302654	2.45246	0	0	0.0144981	0.909581	0.0439044	0.0169241	0.0216219	0.0240359	0	0	0	0	0.00676478	0.072586	0.0803848	2.57265	0.0110662	0.0308304	0.0291348	0.00748258	0.0738888	0.997979	0	0.0199154	4.5449	0.0650208	0.0112094	0	0.0257376	0	1.09437	0.0289934	0.0172093	0.3421	0.132116	0.0336521	0.0364682
ENSG00000004864.14	3.95509	3.89583	2.23453	3.07851	3.54547	3.28371	3.50051	2.92649	3.28435	4.21	4.03384	3.77821	3.4784	3.82306	3.18436	2.55405	3.76634	3.72285	4.2787	3.38528	3.50421	3.50168	3.13795	3.91694	3.69482	4.08076	3.77768	4.22484	3.929	3.38589	4.58086	3.78495	4.50842	2.74237	3.68115	3.67344	4.54344	4.128	3.68428	4.01028	4.22368	4.35293	3.88248	3.86309	4.22635	3.61646	3.96735	3.39812	3.33256
ENSG00000004866.22	2.70255	2.48867	2.19658	2.15526	2.50353	2.10024	1.97823	1.7467	2.06336	2.37075	2.77733	2.50876	2.4392	2.63159	1.99306	1.94572	2.92046	1.59975	3.05742	2.14016	2.47316	2.11523	1.84394	2.98501	2.48166	2.47093	3.25817	2.96366	2.25909	3.90675	2.59791	1.92729	1.26834	2.0391	2.4302	2.17715	3.5432	2.45328	2.20967	2.76844	2.82196	3.07192	2.73706	2.3809	2.80045	2.35318	3.13435	2.62749	2.64319
ENSG00000004897.12	3.3114	3.25764	2.86847	3.32089	3.66593	3.97264	3.65212	3.11796	3.51525	3.8018	3.71767	3.4251	3.89365	3.35781	3.73921	2.96857	3.25573	3.87989	3.10923	3.67938	3.57248	3.37383	3.45565	2.90676	3.68811	3.26117	3.38735	3.2053	4.91791	2.51886	3.1069	4.64247	4.17281	2.45654	3.53931	3.17798	3.0941	3.04096	3.44724	3.77662	3.58752	3.38906	3.15082	2.88057	3.07753	3.68216	3.22699	3.04312	3.26066
ENSG00000004939.15	0.40523	0.0418037	0.00963382	0.0381552	0.0350608	0.218719	0.0630887	0.012068	2.508	0.116631	0.128821	1.34443	0.518938	0.0951818	0.0729976	0.0996319	0.0179219	0.0341453	0.03492	0.878137	1.30556	0.0501882	0.156655	0.305562	3.86389	6.50188	5.68448	0.217727	0.00676478	7.92035	0.276318	3.1396	0.0820213	0.543397	6.79887	6.21235	1.67297	6.33801	6.90088	0.141694	0.135272	5.05476	0.235605	6.07249	0.0652966	0.0980152	1.87853	0.0764223	3.94425
ENSG00000004948.16	0.507719	1.46566	0.0803848	0.955685	0.459746	2.22042	0.630126	0.689657	0.298893	0.273337	0.439357	0.298541	0.415001	0.188781	1.02446	0.146525	2.14971	1.16839	0.152768	0.577344	2.08212	0.215492	0.257011	0.828307	1.0005	1.22799	2.38535	0.214498	3.53891	0.212881	0.0287106	0.187514	2.95626	2.7582	0.173511	0.701416	0.047678	1.35603	0.322274	1.46822	0.455649	0.4728	0.377401	0.801821	0.183963	2.65689	0.642748	0.134089	0.427177
ENSG00000004961.15	3.5194	3.53742	2.46255	3.63211	3.26379	3.18962	4.35714	3.02205	2.98672	3.37375	3.40505	3.55936	3.29489	3.4183	3.37448	2.68455	3.5177	3.20454	3.45101	3.44757	3.25184	3.48354	3.2178	2.90699	3.35875	3.63256	4.5789	4.13694	3.92867	5.80563	3.05252	4.26153	2.92592	2.37331	4.10475	3.94035	3.87437	3.61387	3.92595	3.36643	3.16144	3.35513	3.57192	3.34869	2.99117	3.5692	3.39488	2.91388	3.69417
ENSG00000004975.12	2.68439	2.25556	1.68145	2.46394	3.0414	2.71466	2.26517	2.57536	2.8157	3.03162	2.25429	2.61176	2.8907	2.79807	2.91982	2.4897	2.66596	2.40181	2.28128	2.64524	2.75345	2.58609	2.78754	2.81867	2.6077	2.49817	2.48923	2.32527	0.700173	2.12909	2.85886	2.12287	2.41099	2.88327	2.65812	2.54584	2.89012	2.30912	2.42471	2.74334	3.19147	2.29781	2.1274	2.39917	3.09751	2.6951	2.7392	2.64672	2.79979
ENSG00000005001.10	0.0504669	0.00906047	0.506094	0.0236102	0	0.0833836	0.0114956	5.03172	0	0.461109	0.00992041	0.0465609	0.00762609	0	1.69238	0.702214	0.0756011	0.0221192	0	0.111833	0	0	0.0401209	0.0263043	0.11023	1.00734	0.377735	0.0136409	0	2.11183	0.0871912	2.94443	0	0.047678	2.38377	2.72905	0.11023	0.948152	1.54888	0.051024	0.0335111	0.0116388	0	0.933573	0.044604	0.0402612	0.212507	0.0608775	0.545771
ENSG00000005007.13	3.89604	4.0323	2.86441	3.47121	3.98251	4.05186	3.52852	3.67879	3.91122	3.41177	3.87834	3.79444	3.68812	3.51904	3.83206	3.43124	4.02076	3.66621	3.73847	3.31378	4.09169	3.57569	3.62012	4.10536	3.96702	4.05687	3.7169	3.51681	1.39023	4.02706	3.52639	3.57425	3.77851	3.56942	4.16064	4.4603	3.89631	4.26836	4.57193	4.0283	3.91146	3.36617	3.47283	3.71714	3.78802	3.74502	3.72969	3.32818	3.91321
ENSG00000005020.13	4.29872	4.72297	3.04885	4.01838	4.52256	4.4467	3.62938	3.5641	3.86765	5.29934	4.9384	4.73396	4.4524	3.60225	4.09314	3.65596	5.20054	4.52975	4.71352	4.90761	4.69093	4.65598	4.10164	4.87037	4.11652	4.0784	4.68349	5.0565	6.06963	3.52612	4.86937	5.01071	4.65035	2.59844	4.48616	4.44075	4.45326	4.06785	4.41606	4.71444	5.15897	5.39952	4.70102	3.72406	4.91668	4.7636	4.30433	4.34311	4.33143
ENSG00000005022.6	6.92594	6.79818	5.40942	6.6108	6.3546	6.2567	6.92659	6.30608	6.37374	6.81101	6.59894	6.27967	5.95533	6.73889	6.57972	7.00138	6.46423	6.11851	6.7942	6.87225	6.29162	6.55017	6.52552	6.70815	7.04599	7.90585	9.2147	8.16602	5.86653	10.181	6.42043	6.57106	5.79232	5.5776	7.89018	7.71733	7.7182	8.06833	8.29713	6.33537	6.45809	6.72875	7.02558	7.93511	6.45865	6.88536	6.59041	6.24387	7.0112
ENSG00000005059.16	1.15452	2.5453	1.04215	2.91039	0.946207	1.79606	1.74846	2.76267	2.22694	2.6006	2.017	2.54784	1.68943	1.72203	2.10782	2.13862	2.41662	3.21693	2.18606	2.19535	1.49564	2.02935	2.85941	1.41975	1.58688	0.952259	1.24373	2.74956	2.72469	0.830985	2.35021	2.62293	2.82407	2.41819	0.644225	1.02148	1.72098	0.603502	0.712728	1.40054	1.12532	1.89115	1.95039	0.794686	1.4567	2.46864	1.18008	2.64473	2.89894
ENSG00000005073.6	0.466027	0.0869196	0.332164	1.52045	0.614097	0.924936	0.219958	0.37729	0.632734	1.61216	0.354339	0.204767	0.876566	0.733962	2.2398	0.651316	1.96081	0.326652	0.198117	1.5507	0.720629	0.713608	0.455649	0.846955	0.683382	1.31022	1.47617	1.45054	0.454176	0.0880059	0.232415	2.37732	0.417164	0.211137	2.1354	1.28262	0.743213	1.14698	1.54171	0.775767	0.440102	0.474773	0.146916	1.23229	0.275484	1.02694	0.599127	0.319155	0.722204
ENSG00000005075.15	4.34167	4.68521	5.67308	5.09052	3.78547	3.59277	3.84504	4.64556	3.63926	4.70956	4.04786	3.95607	3.52445	4.14899	3.69014	4.84942	4.88795	3.7326	4.84254	3.9246	3.67117	4.03299	3.97206	5.13515	3.3616	3.86463	4.0077	4.0123	1.29731	4.6317	4.71852	3.19098	3.94202	6.01989	3.77597	4.04041	4.66171	4.02342	3.82735	3.65544	3.72836	4.32757	4.33764	3.84009	4.38315	3.61672	5.07396	5.04535	4.49598
ENSG00000005100.13	2.16269	2.2787	1.93009	2.20348	2.53129	2.58012	2.11577	2.14385	2.66569	2.72006	2.554	2.24878	2.63814	2.13668	2.16063	1.95215	2.30217	2.18775	2.2052	2.31374	2.27026	2.45144	2.50106	2.55265	2.41308	2.39884	1.99146	1.8322	2.3838	1.16582	1.94508	2.30261	2.37761	2.03956	2.32199	2.24799	2.22373	2.25529	2.39144	2.63366	2.52955	2.0719	2.07193	2.12615	2.49057	2.39698	2.27977	2.50454	2.28493
ENSG00000005102.14	0.0801119	0.449957	0.730227	0.346758	0.675997	1.03675	0.146916	0.0791562	0.499986	0.158596	0.17594	0.247685	1.05728	0.156267	0.970706	0.130799	0.193835	0.460428	0.0581086	0.185359	0.202261	0.549423	0.210514	1.24647	1.35823	0.116498	0.140517	0.193456	0.216734	0	0.131194	1.40909	0.838105	0.201383	0.271187	0.201508	0.0378742	0.0436245	0.113434	0.452806	0.0298416	0.194213	0.557974	0.0773797	0.275007	0.0710762	0.464459	0.171591	0.143263
ENSG00000005108.16	2.0273	1.91092	1.49026	1.29977	2.63988	2.51823	1.93127	0.534261	2.58556	1.34022	1.41164	1.53197	2.60597	1.22447	1.8779	0.175173	1.01285	2.52971	1.96359	2.00651	2.76988	2.3041	1.86144	2.03037	2.48947	3.39494	4.28374	1.98576	3.0428	4.3867	1.3744	3.86094	3.09691	0.559051	4.28741	3.83187	2.77945	3.6068	4.61962	2.22151	1.51929	1.12664	1.63129	3.28198	1.9991	1.73907	1.89829	1.56638	1.85268
ENSG00000005156.12	1.31661	1.41954	0.850719	1.28954	1.49144	1.47861	1.66726	1.22885	1.50039	1.63524	1.4741	1.47939	1.42718	1.20113	1.26219	1.51843	1.6854	1.35766	1.28558	1.25278	1.3051	1.2092	1.3672	1.58823	1.47259	1.33314	1.39028	1.44509	0.79859	1.16324	1.17805	1.48625	1.48934	1.10481	1.58453	1.75694	1.75352	1.39243	1.73565	1.49508	1.76939	1.47576	1.16157	1.25858	1.65205	1.36031	1.37973	1.19724	1.34767
ENSG00000005175.10	2.10115	2.54139	1.68764	2.13113	2.36564	2.36754	2.78683	2.07183	2.1099	2.97587	2.58736	2.66564	2.4507	2.24662	2.36233	1.84968	2.84876	2.35726	2.27068	2.36569	2.4187	2.17989	2.29563	2.29596	2.45478	2.53346	2.56638	2.47597	3.68167	2.26445	2.14323	3.50734	2.52248	1.71229	3.19997	2.64259	2.58138	2.31182	2.90298	2.55712	2.56552	2.58179	2.24236	2.18745	2.24683	2.20514	2.1308	2.19242	2.56049
ENSG00000005187.12	1.98739	2.63582	0.437441	0.858538	1.6548	1.04397	3.93726	0.598365	0.706729	1.65828	1.79106	2.51987	1.77429	2.05866	0.986593	1.06288	2.34432	1.96307	1.15212	1.45354	2.19251	2.50409	1.09221	2.63031	2.45296	3.35311	2.39358	1.91	1.97743	2.75185	0.436162	2.05956	3.19389	1.53042	3.06999	2.83317	3.07776	3.50158	2.43192	2.73446	2.80869	2.81042	1.98178	3.10158	2.08423	1.37912	2.51927	1.96114	2.31568
ENSG00000005189.20	0.745539	1.13363	0.171335	0.876487	0.487898	0.802731	0.877195	0.311852	0.773406	1.24945	0.916706	1.0706	1.00827	0.688225	0.609093	1.16903	0.726482	1.10949	0.593115	0.935837	1.00058	0.779806	0.47747	0.662388	0.70558	0.495797	0.753177	0.474773	0.854873	0.522859	1.6678	0.756084	1.41148	0.664301	0.798921	1.14379	0.602267	0.416191	1.23824	1.01821	0.888617	0.960882	0.611833	0.414677	1.01657	0.798673	1.05332	1.21064	1.26664
ENSG00000005194.15	3.96844	3.89821	2.48687	3.75711	3.65964	3.59139	3.62632	3.61019	3.374	3.98976	3.89423	3.67891	3.62438	3.33377	3.72433	3.78888	3.45449	3.68248	3.82883	3.75253	3.90432	3.61987	3.45514	3.62182	3.64761	3.74886	3.69107	4.71874	2.53047	4.35818	3.8257	3.13419	3.92765	3.08096	3.91602	4.05991	4.44606	3.75084	4.2413	3.77629	3.69599	4.81241	3.65809	3.67646	3.27398	3.63713	4.00298	3.60242	4.1055
ENSG00000005206.17	2.71912	2.7545	2.75508	2.98821	1.99081	2.69737	2.84649	3.20331	2.78308	2.67888	2.73327	2.5743	2.75345	2.3338	2.19856	3.02084	3.53756	2.0558	2.51243	1.98816	2.13547	2.4541	2.2833	3.02123	1.88604	1.92695	2.13895	2.45096	0.264596	2.62805	2.57262	1.39149	1.89596	2.97536	1.72622	2.19226	2.44111	1.98812	1.95479	2.43328	3.17495	1.93055	2.39166	2.39152	3.08933	2.44692	2.76271	3.11921	2.77526
ENSG00000005238.20	2.643	1.89848	2.48705	2.63003	2.27828	2.52218	1.99487	3.36718	3.04888	2.20817	2.59051	1.86076	2.58101	2.51435	2.38264	2.2006	1.99552	2.52852	2.15766	1.95024	2.22598	2.48525	2.43328	1.74019	2.10279	2.10491	1.77918	2.1333	1.16305	2.61223	2.08994	1.83738	2.11198	2.20899	1.848	1.78894	1.79127	2.16932	1.98859	2.53975	1.75164	2.27608	1.85156	2.20721	2.20229	2.16211	2.26439	2.49303	2.24086
ENSG00000005243.10	4.23863	3.95884	3.13659	3.71407	2.57691	3.15001	2.2318	3.25743	4.29768	3.95406	4.02465	2.98247	3.27137	3.24651	3.81247	3.6545	3.48188	3.19537	3.05374	3.7498	3.45343	3.29577	3.46807	2.69265	3.04902	2.97249	2.80139	2.88688	2.77558	1.96188	3.03281	2.24285	3.42935	4.55746	2.78178	2.77777	3.22222	2.8125	2.75999	2.81605	0.744419	4.51504	3.41683	2.90935	2.02499	3.66873	4.01376	3.75697	3.23691
ENSG00000005249.13	1.06102	1.68652	1.40354	1.56023	0.668028	1.36592	2.16047	0.922578	1.98528	1.28096	1.0411	1.14294	0.986666	1.88838	2.32048	1.42975	1.94725	1.86894	0.996967	2.01703	1.32826	0.923872	1.22669	0.708673	1.53973	2.76901	0.903424	2.39846	2.22802	0.429214	1.18523	4.33724	1.73398	0.688046	3.95156	2.94111	3.51586	2.65311	3.38707	1.37629	0.979879	1.57952	1.24044	2.6274	0.66512	1.55792	1.51106	1.10252	2.02758
ENSG00000005302.19	1.82395	1.85746	1.26867	2.2279	1.92645	2.62314	2.69842	1.93353	2.67523	2.17297	1.77176	1.71396	2.53254	1.89678	2.02584	2.0059	2.23918	1.92702	1.86422	2.31272	1.92372	1.87716	2.22854	1.46796	1.99845	1.46116	1.79876	1.80871	1.99726	1.76935	2.06257	1.97603	1.85665	1.70283	1.79946	1.62616	1.78304	1.22287	1.66266	2.02031	1.71326	1.47025	1.8871	1.46441	1.95136	1.67025	1.46848	2.36578	2.17556
ENSG00000005339.15	3.2292	3.16047	2.815	2.72133	3.82633	3.78256	3.39949	2.38623	3.33112	2.83145	3.21749	2.99516	3.64489	3.08953	3.20549	2.59055	3.01425	2.71454	3.02593	2.59247	3.69251	3.18419	3.03208	3.4529	3.5213	2.94826	3.5994	3.07652	2.51359	2.90506	2.77722	2.73879	2.96293	2.26346	2.84258	2.90643	3.31955	3.01273	3.38645	3.92069	3.01954	2.96918	2.78768	2.70496	3.48948	2.93838	3.0073	2.87625	3.11869
ENSG00000005379.17	0.811471	1.30083	0.382169	0.797428	0.784588	1.50604	1.51733	2.18587	1.08229	1.10575	0.667847	1.47212	1.95513	0.82326	1.31028	0.745022	1.66971	1.3463	0.636729	0.77762	0.906429	0.826762	1.039	1.67193	1.06074	1.35327	0.995665	1.0273	0.133958	0.240253	0.282143	0.985792	1.36782	1.29355	1.61838	1.93335	1.06122	1.33565	1.62929	1.06025	0.450274	0.413052	0.396488	1.60748	1.45828	1.09282	0.557876	1.80995	1.52847
ENSG00000005381.8	0.0342157	0.0485152	0	0.1595	0.0340748	0.0661236	0.0154976	0	0.365581	0.234133	0.0531113	1.15944	0.0558898	0.0353424	0.0930192	0.262914	0.032383	0.0193461	0.169668	0.0697022	0.042084	0.0426443	0.156138	0.0354832	0.1145	0.026021	0.0712135	0.291486	0.00977712	0	0.140386	0.102725	0.218657	0.0797024	0.133564	0.0479571	0.791939	0.0332292	0.15082	0.0346383	0	2.44079	0.0473988	0.0170667	0.14091	0.0978804	0.00805655	0.282736	0.0402612
ENSG00000005421.9	0	0.125254	0.159629	0.112767	0.00762609	0.0254541	0	0.0574156	0.0243197	0.0186342	0	0.00848689	0.0204844	0.0234683	0.0582472	0.315102	0.0173518	0.0508151	0.00848689	0.0094905	0.00805655	0.148088	0.0360461	0	0.00791308	0.269632	0.0569996	0	0.0514417	0	0.740366	0.0521376	0.0649518	0.0742314	0.155749	0.0174944	0	0.0330882	0.0326651	0.0154976	0.185232	0.0103502	0.00906047	0.0886844	0.013498	0.0122111	0	0.0776532	0.283922
ENSG00000005436.14	2.23496	2.08668	1.52216	1.58101	2.12095	2.31493	2.67462	1.71101	1.93134	2.27986	2.46077	2.62987	2.14294	2.15989	1.96647	1.61122	2.48882	2.55422	2.0969	1.92231	2.37028	2.24519	1.80261	2.24674	2.27447	2.2338	1.99291	2.38802	3.83175	1.67794	2.12019	2.85481	2.72308	1.49534	2.79423	2.51013	2.49354	2.36258	2.94826	2.469	2.73654	2.30638	2.1504	2.04117	2.27938	2.26087	2.06316	2.39975	2.01685
ENSG00000005448.17	3.38286	3.80836	2.97827	3.32382	3.36885	3.54134	3.82788	3.83634	2.88516	3.45155	3.72192	3.28837	2.38976	4.06577	3.28165	3.89089	3.2671	3.15052	3.67562	3.98977	4.10728	3.34819	3.75557	3.21954	3.10279	2.32268	3.0525	2.70713	1.37173	0.683472	4.14175	2.15656	3.80438	3.39871	2.83019	2.76156	1.73266	2.40253	2.64906	3.78523	3.78787	4.20208	3.73599	2.2349	3.60079	3.90066	4.62667	3.31143	3.77446
ENSG00000005469.12	2.25571	2.50942	1.354	1.73782	1.38471	2.07214	2.12281	1.77476	1.923	2.387	2.60212	2.07875	2.34662	2.16572	2.51086	1.72408	2.75489	2.41357	1.96868	2.16385	1.86445	2.08631	1.87998	2.34574	2.33914	3.23002	2.50174	2.84302	3.37228	2.37835	1.52877	4.5798	2.36323	1.73392	3.89678	3.4575	3.19212	3.14952	3.51687	2.50016	2.38281	2.73498	2.28161	2.77846	2.4982	2.3651	2.23005	2.46728	2.4805
ENSG00000005471.19	0.864572	2.12476	0.123534	0.285106	0.840765	1.14359	1.483	0.206018	0.501108	0.87798	0.462785	0.638769	1.66166	1.4567	0.302056	1.11137	1.93945	2.02487	0.535555	0.361319	1.59163	1.08318	1.58712	0.465818	1.30036	0.198494	1.04278	0.423955	1.11483	0.0462815	0.0543623	0.416732	2.53732	0.341417	0.140386	0.110898	0.483468	0.183201	0.0880059	0.877901	0.144177	0.0939658	0.812211	0.173895	0.964362	1.33234	0.309875	0.316262	0.425459
ENSG00000005483.21	3.52325	3.52314	3.27568	2.98481	3.94575	4.14939	3.86483	3.30255	3.81808	3.72846	3.52032	3.94042	4.32482	3.26493	3.62282	2.77391	3.71447	3.5033	3.81838	2.88675	3.64231	3.5745	3.36477	3.67016	3.70938	3.28131	3.63684	2.94944	4.46737	2.63462	3.44693	3.83801	3.84725	2.99848	3.24662	3.52917	2.89371	3.18943	3.87925	4.21986	3.37891	3.34182	3.19757	2.95086	4.19118	3.20942	3.37697	3.92748	3.67466
ENSG00000005486.17	4.90187	4.77409	5.22151	5.26987	4.57588	4.61275	4.47805	5.15746	5.02334	5.66536	5.21808	4.2407	4.10255	5.5994	5.21075	5.69754	5.11627	4.26408	5.62818	4.97578	4.48627	4.78811	4.68658	5.83154	4.47095	5.38763	4.61318	5.41874	2.47913	5.41613	6.02485	5.15586	4.1741	5.5063	5.57659	5.68166	5.43531	5.49162	5.41822	4.79817	5.41048	5.79297	5.2028	5.45325	4.70288	5.02221	5.56755	5.43279	5.06678
ENSG00000005513.10	0.179893	0.0848807	0.309875	0.127369	0.365804	0.701682	0.030548	0.529871	1.70505	0.143132	0.208143	0.00504062	0.550999	0.281075	0.480886	0.0536674	0.184217	0.114634	0.0790196	0.326422	0.230695	0.258338	0.211511	0.102725	0.4246	0.147697	0.892663	0.55031	0.0231844	0.630499	0.033793	0.412944	0.190488	0.129745	0.0905825	0.321466	1.40697	0.0959919	0.148869	0.317536	0.0357647	0.0184917	0.129745	0.123666	0.108625	0.0982848	0.123136	0.131326	0.175429
ENSG00000005700.15	3.56446	3.00775	2.22435	2.55653	3.29503	3.2519	3.26677	3.28611	2.94368	3.60738	3.81662	4.05141	3.54343	3.22206	3.07382	2.45162	3.12309	3.91888	3.37426	3.45514	3.24417	3.29132	2.80188	3.25742	3.57948	3.34524	3.43157	3.72353	4.832	3.10857	2.60455	4.36715	4.02864	1.7806	3.82811	3.67611	3.5278	3.27152	4.11091	3.86694	3.7582	3.808	2.83701	3.0273	3.41457	3.54999	2.98008	2.77159	3.17009
ENSG00000005801.18	1.28747	1.62256	1.16092	1.69613	1.31921	1.70301	1.73777	2.00838	1.38178	1.49529	1.27083	1.93712	1.99874	1.71299	1.28167	1.49108	1.84422	1.80948	1.56282	1.53416	1.29643	1.46347	1.56125	1.45402	1.52216	1.26454	1.66812	1.77074	2.38535	1.66225	1.18593	2.00274	1.7602	1.63343	1.50716	1.28706	1.96414	1.16704	1.38449	1.6814	1.8166	0.980976	1.52687	1.26039	1.53242	1.32843	1.34897	1.82383	1.75672
ENSG00000005810.18	2.49411	2.46375	0.938248	2.01353	2.81178	2.98583	2.74921	1.38355	2.85192	2.36676	2.31019	3.27986	2.87204	1.94897	2.50965	1.23885	2.15956	3.37565	2.24796	2.15192	2.51911	2.2722	2.34591	2.14773	2.95518	2.48169	2.34139	2.69673	2.9463	1.23002	2.06633	3.10846	3.29681	1.81562	2.91947	2.32294	2.56064	2.47194	3.07017	2.91942	2.00198	1.82228	1.85296	1.96824	2.47563	2.18257	1.85028	2.23845	2.5779
ENSG00000005812.11	3.3143	2.75856	2.44953	2.82668	3.50877	3.6484	3.27384	3.08427	3.23089	2.55518	3.58885	3.50798	3.72845	3.92544	3.48373	1.89309	2.54597	3.60593	3.42059	3.95278	3.89565	3.06355	3.2029	3.12763	3.78445	3.51396	3.38072	3.29669	5.24969	2.94431	2.7656	4.19777	4.03655	1.9871	4.00063	3.6145	3.24103	3.44526	3.77658	3.82016	3.6754	3.0754	3.3359	3.27274	3.12372	3.60673	3.20124	2.83261	3.27437
ENSG00000005844.19	1.82355	2.44506	1.12684	3.38796	2.21064	2.43536	2.14897	0.143916	2.21378	2.7994	2.32766	2.65787	2.131	2.14571	2.08073	2.07118	2.09882	2.40481	2.34062	1.76998	1.88249	1.96196	2.59658	2.69026	1.93229	0.618709	1.85726	1.57691	1.39972	0.216113	2.62814	1.1044	2.02926	2.82479	0.288772	0.341303	1.08923	0.366364	0.184852	1.70421	1.36799	2.11879	1.49789	0.549324	2.57616	1.64925	1.40229	3.94491	3.34103
ENSG00000005882.12	4.08183	3.57817	1.65104	2.3431	3.54296	3.36776	3.10274	1.12592	2.43848	1.95181	3.5177	3.31248	3.22447	3.87821	2.97021	3.09106	3.07169	2.82961	3.2262	3.18767	3.61255	3.39424	2.54362	3.63048	3.50402	3.76162	3.35854	3.54467	1.36031	2.44071	1.33771	1.80941	2.94402	2.60298	3.70847	3.64164	4.37837	4.42631	3.87388	4.00381	3.61161	3.0517	2.96687	3.8458	3.95262	3.59845	3.44432	2.04967	3.1357
ENSG00000005884.18	4.66715	6.03822	4.34742	5.78063	4.49497	4.77202	5.29056	6.58563	4.50092	4.83656	4.87615	5.53619	4.59489	4.71833	5.76491	5.949	5.46662	6.73771	5.79593	4.61947	4.35533	5.29398	4.72827	5.27609	4.4856	5.15408	4.12958	5.32467	2.1978	2.38877	3.55889	5.00496	5.71519	5.64647	3.61517	4.60814	4.23216	5.10224	3.94387	4.73313	4.82305	4.75488	4.3434	4.66697	5.17471	5.18115	5.34377	5.58582	5.61737
ENSG00000005889.16	2.17175	2.28072	1.63701	1.92307	2.77132	2.7599	2.7813	1.78681	2.79917	2.26243	2.65276	2.3499	2.81515	2.05509	2.84234	1.59417	2.51251	2.9138	1.91823	2.34153	2.31388	2.12595	2.21763	1.93032	2.55934	2.12595	2.70545	2.19077	2.90398	2.08035	2.56206	3.15403	3.14121	1.30182	2.98227	2.32513	3.14538	2.0754	2.71205	2.64929	2.80002	1.9344	2.21406	2.04782	2.53134	2.41768	1.91701	2.50533	2.1973
ENSG00000005893.16	5.23969	5.93036	3.79873	4.60103	5.1977	4.95716	6.21622	4.61447	4.50857	5.3684	5.43014	5.90642	5.19259	5.48099	4.76969	5.0178	5.47554	5.49432	5.4306	5.43055	5.32705	5.42969	5.00902	5.17207	5.20359	4.84773	5.72873	5.90802	6.34453	5.79794	4.93999	5.52202	5.27625	3.81543	5.27996	4.97881	5.42399	4.94335	5.13385	5.48925	5.67675	5.21958	5.4185	4.56583	5.13581	5.79319	4.90091	4.00201	4.93219
ENSG00000005961.19	0.408821	0.24817	0.0931545	0.15549	0.10608	0.562865	0.343124	0.385928	0.384713	0.537743	0.131853	0.260507	0.403595	0.0859685	0.132511	0.330558	0.470198	0.162274	0.182946	0.0816123	0.249142	0.302758	0.309176	0.349365	0.133827	0.0945063	0.20989	0.0941009	0.0122111	0.0946415	6.60762	0.141302	0.351346	0.233765	0.261591	0.488823	0.0588014	0.1149	0.30906	0.0775165	0.179766	0.601697	0.0585243	0.156526	0.224905	0.104471	0.148479	0.784001	0.153157
ENSG00000005981.13	0	0.064607	0.0107798	0.0951818	0.068602	0.0147838	0.0701145	0.0333701	0.0280033	0.0267293	0.156655	0.00977712	0.0313952	0.167872	0.0146409	1.47923	0.265077	0.458014	0.344374	0.0163537	0.0368901	0.49917	0.520146	0.0540844	0.147307	0.0831112	0.0184917	0.0210533	0.0371713	0.00518438	0.0713508	0.0451634	0.0526941	0.0309716	0.323658	0.0597706	0.0863762	0.0812033	0.0632268	0.0265876	0.565792	0.012068	2.36098	0.045443	0.148479	0	0.067088	0.0363275	0.119688
ENSG00000006007.12	3.74968	3.84403	2.40297	3.41079	3.36281	3.46554	3.43634	3.10822	3.17262	4.29381	3.64734	3.85572	3.46519	2.91856	3.95435	3.09786	3.50948	3.50595	3.29823	3.84815	3.29954	3.70174	3.6194	2.99798	3.52149	4.06025	4.50785	4.31203	3.23439	5.09618	4.75355	4.32978	3.7496	3.54076	4.36714	3.9611	4.09107	3.96772	4.24781	3.38674	3.14178	4.50145	3.56797	3.8345	3.06941	3.80235	3.37704	3.22886	3.8873
ENSG00000006015.18	2.50177	2.72674	2.7282	3.09687	1.96769	2.31354	2.64376	2.94912	3.20488	2.08997	2.03773	2.18945	2.57088	1.6564	2.00465	3.14802	3.67526	2.36751	2.10949	2.56177	2.00097	2.21568	2.74022	2.80023	1.55817	2.20185	1.94759	1.95539	0.254473	3.07248	3.10449	1.19484	2.17458	3.20467	1.62733	2.23432	1.87488	2.19106	1.54799	1.59956	1.63682	2.41762	2.74369	2.13718	2.89208	2.22876	2.26427	2.7389	2.40879
ENSG00000006016.11	0.698752	0.00733905	1.36283	0.426748	1.70013	2.2337	0.0184917	3.52104	3.67213	0.773912	0.385265	0.10286	0.123931	0.483055	3.13595	0.949796	0.301236	0.318114	0.0451634	1.45812	0.936892	0.401521	1.104	0.245131	0.792106	0.411535	0.361319	0.0432045	0.0231844	1.88225	0.10916	2.93421	0.146134	0.225028	0.502942	1.12631	0.0114956	0.344488	0.657366	0.705668	0.13014	0.125519	1.45512	0.235727	0.0996319	0.922578	1.03823	1.74872	1.04362
ENSG00000006025.12	1.07169	1.47171	0.872317	1.56423	1.15075	2.1172	1.61433	1.79656	1.96196	1.58458	1.0999	1.56218	1.80657	1.21419	1.70057	2.56406	1.59369	1.42761	0.580242	1.07567	1.50569	1.12261	1.55474	1.06826	1.25695	1.03252	1.28487	1.16537	0.183455	0.416299	1.30363	0.982437	1.13744	2.21785	1.18523	1.54617	1.32907	1.14281	1.26249	1.49124	1.04026	1.26544	0.801407	1.29196	1.58477	0.982948	1.05353	2.00985	1.65269
ENSG00000006042.12	3.68802	4.12628	2.2519	3.36219	2.60959	3.37573	2.79631	1.19188	3.24954	3.05012	1.85104	4.79383	3.91486	4.0703	3.4252	2.71061	3.85322	2.6279	2.47059	4.04754	3.14457	3.30296	3.33838	4.40501	3.64307	3.26006	3.10581	4.61671	2.44837	0.343124	0.878372	2.76065	4.55203	2.74603	1.87582	2.64302	4.64533	3.31709	2.13373	2.20361	3.09354	3.87482	2.15585	3.18857	1.80533	4.40093	1.51697	1.59917	3.30118
ENSG00000006047.13	0.0619835	1.5911	1.16723	1.1705	0.284514	0.307195	0.189413	0.495388	0.00705194	0.30871	0.183328	0.191563	0.232906	0.123931	0.130404	2.27584	0.925468	0.179511	0.153157	0.380286	0.308244	0.3421	0.709202	1.17479	0.121811	0.380286	0.244765	0.00705194	0.215616	1.30731	0.179893	0.211884	0.260568	2.1133	0.348119	0.186501	0.0578315	0.319734	0.374511	0.218471	0.326422	0.572114	1.10829	0.398788	0.436162	0.238665	1.10306	1.65086	0.831067
ENSG00000006059.4	0	0.172616	0	0	0	0	0.0416635	0	0	0	0.0360461	0.418244	0.0139267	0	0.0342157	0	0	0.0101353	0	0	0.0163537	0	0.0184917	0.0241778	0	0	0.038998	0	0	0	0	0.0703893	0.0128547	0.705226	0	0.0119249	0	0	0	0	0.0607392	0	0.0184917	0	0.0274372	0	0	0.0321008	0
ENSG00000006062.17	2.68836	3.41016	1.87806	3.00784	2.60661	2.59113	3.02466	3.16818	2.74646	2.50014	3.01387	3.10242	2.5288	2.59158	1.72727	4.30335	3.52273	3.2008	3.60799	1.45754	2.38877	2.40844	2.43186	4.4077	1.9915	1.87511	1.59469	1.58039	0.737427	1.05082	1.35219	1.58019	2.83217	2.85923	1.14718	2.25314	1.26975	1.62181	1.45875	3.05728	3.71185	3.04306	2.11513	1.54656	3.7464	1.45628	2.99525	3.3445	3.43912
ENSG00000006071.15	0.00963382	0.00345832	0.065848	0	0.0536674	0.0147838	0.0346383	0.0147838	0.0231844	0.0137838	0.0094905	0.00360224	0.0100637	0.0024505	0.0614306	0.0382957	0.010923	0.016211	0.00532812	0.0119249	0	0.00690837	0.00762609	0.0150693	0.0329472	0.113167	0.016211	0.393636	0	0.032383	0.021764	0.00748258	0.00532812	0.0340748	0.0387171	0.0270125	0.202136	0.0553345	0.0626744	0.0194884	0.0254541	0.00216242	0.0192037	0.170566	0.0227584	0	0.033793	0.0150693	0.0159257
ENSG00000006116.4	0	0.0224743	0	0.0292762	0	0.0176369	0.0284277	0	0.0336521	0.0129262	0	0.0117819	0	0	0	0	0	0	0	0	0.0112094	0.0113525	0	0	0	0	0	0	0	0	2.28469	0	0	0.044604	0	0.016211	0	0.0604625	0	0	0	0	0.0126402	0.015783	0	0	0	0.0328061	0
ENSG00000006118.15	3.02201	1.43162	2.28978	3.9887	2.46767	2.5103	2.30784	2.28611	2.40618	3.37312	2.48244	1.89274	3.01831	2.00263	2.55358	3.11848	1.61202	3.29286	1.91968	2.18726	2.71191	3.01639	3.19393	2.39843	2.00659	1.22367	1.26069	1.68473	0.119157	1.62765	2.45006	1.80157	3.1002	3.31449	2.12823	2.04893	1.90153	1.12922	1.66712	1.77745	1.08678	0.84141	3.1343	0.967538	2.22922	1.5147	1.91158	2.76886	1.7956
ENSG00000006125.18	5.76979	5.27636	4.36563	4.78343	5.3862	5.63167	5.23614	4.77837	5.09131	5.04244	5.6545	5.3199	5.45224	5.28361	5.6038	4.88557	4.97906	5.40612	5.25609	5.3779	5.61448	5.36771	5.24504	4.78304	5.6749	5.62225	5.44182	5.81589	4.97787	4.65621	4.63217	5.72298	5.01385	3.87673	6.08178	6.01741	5.62578	5.72132	5.98083	5.55097	5.25229	4.95726	4.92045	5.30554	5.34525	5.43828	5.28781	4.73119	5.41478
ENSG00000006128.12	0.0282862	0.297133	0	0	0.0117819	0.304044	0	3.21921	0.109962	0.0984196	0	0.57889	0	0.140255	0.0769695	0	0.013498	0	0	0.584674	0	0.0126402	0	0	0.288418	1.43659	0.106214	0	0	0.0418037	0	0.694212	0	0	0.0965317	0.325502	0.0197731	0.223793	0.244278	0.0589399	0.0234683	0.0942361	0.0140696	0.612588	0	0.0374525	0.0166389	0.0123541	0.217851
ENSG00000006194.10	2.22132	2.6912	2.1583	2.20564	2.6947	2.65184	2.54624	2.77886	2.71756	2.49375	2.45149	2.51979	2.71363	2.50569	2.48032	2.38761	2.60668	2.6328	2.51501	2.12582	2.9636	2.19632	2.51677	2.65762	2.3518	2.37504	2.87912	2.19988	1.65099	2.90779	2.52449	1.97019	2.94916	2.17233	2.38551	2.61626	2.04632	2.23876	2.46085	2.81311	2.8922	3.10675	2.29399	2.13576	2.64856	2.3062	2.71039	2.6277	2.68663
ENSG00000006210.7	6.16886	5.60306	5.81354	3.91226	6.54367	5.53853	5.50423	4.03576	5.79813	3.68021	6.04531	5.78899	5.84006	5.84409	4.92491	3.88648	4.33575	5.08326	6.17651	5.18582	6.76237	5.84526	4.90601	5.74919	5.29373	4.48993	5.6435	5.17283	3.50773	4.23977	2.3065	3.90416	5.00247	3.44664	4.02103	4.45188	5.6868	4.43353	4.28171	5.95172	5.0924	4.83346	5.79017	3.68521	5.73849	4.94565	6.27675	4.86114	5.83692
ENSG00000006282.21	4.55627	4.2446	3.49561	4.43183	3.39656	3.36211	3.88267	3.51195	3.72034	3.51101	4.2717	4.2292	3.95792	4.31001	1.97966	4.97567	4.28545	3.57675	3.69773	3.51453	3.5893	4.09034	3.73771	4.90585	3.6043	3.60274	3.77306	3.98778	1.2652	3.76041	3.43145	3.0533	4.11185	4.44975	2.86548	3.84526	5.04212	3.42037	3.89361	4.40304	4.4868	3.88422	3.84345	3.7922	4.19908	4.36266	3.34055	4.12194	4.01691
ENSG00000006283.18	0.0024505	0.0340748	0.00489684	0.0140696	0.0179219	0.0219061	0.0244615	0.0244615	0.0508847	0.0172093	0	0.00891709	0.016211	0.021764	0.0133551	0.0593553	0.0385767	0.00281052	0.00891709	0.00992041	0.00848689	0.0129262	0.0214797	0.0124972	0.0103502	0.0251706	0.0102069	0	0	0.00475306	0.0330882	0.0794293	0.0333701	0.00288251	0.0169241	0.00158609	0.0169241	0.00590296	0.00518438	0.0142124	0.0199154	0.0164963	0.00963382	0.0210533	0.0106366	0.00963382	0.00575927	0.00834346	0.0142124
ENSG00000006327.14	5.24037	5.64833	6.24615	6.35203	4.24723	3.22007	4.59607	7.78728	5.87207	5.82982	4.76056	5.51018	4.06399	4.6627	4.95925	6.12728	5.2415	5.49481	7.09352	4.4021	2.98246	5.19203	4.82441	6.15464	3.39742	4.73641	4.74432	5.6344	2.10551	6.69934	4.76139	5.09608	3.59885	5.10177	3.87618	6.44273	4.82632	3.90688	3.89529	4.763	5.66801	7.05525	5.50008	3.51792	4.49424	5.17275	6.72962	6.65255	6.22997
ENSG00000006377.11	0.167486	0.126709	0.476226	0.220701	0.347892	0.569102	0.0702519	0.440208	0.202762	0.0143553	0.125783	0.026021	0.384492	0.164143	0.37829	0.113567	0.234747	0.0835878	0.0706641	0.197865	0.219587	0.366812	0.251204	0.305679	0.266637	0.0200577	0.0775165	0	0.307662	0	0.00891709	0.00676478	0.128227	0.105142	0.0326651	0.044604	0.0196308	0.0255958	0.064607	0.363115	0.207143	0.0398403	0.108625	0.00877371	0.181421	0.0913952	0.0968016	0.263395	0.104605
ENSG00000006432.15	0.115699	0.319618	0.23352	0.260869	0.111566	0.478195	0.41997	1.06219	0.296428	0.898557	0.14965	0.383608	0.348572	0.206018	0.854873	0.581496	0.575506	0.624522	0.254473	0.542704	0.251204	0.175429	0.438719	0.392098	0.71563	1.18536	1.68903	1.1825	0.10286	1.28859	0.967611	1.65049	0.676358	0.326422	1.41619	1.61013	0.896621	1.17556	1.58381	0.316957	0.351402	0.566182	0.272501	0.967685	0.339137	1.10729	0.435202	0.5007	0.719753
ENSG00000006451.8	4.00835	3.75582	3.88409	4.06207	4.48852	4.44215	3.78036	3.5786	4.04701	4.95174	4.10596	3.97097	4.39253	4.1104	4.3095	2.83406	4.09017	3.62512	4.63357	4.52106	4.68183	4.05451	4.7148	4.0101	4.22111	3.8403	5.01055	3.73883	5.29996	5.35719	4.78618	4.51023	3.85964	2.9481	4.04351	3.85949	3.63451	3.62239	3.74355	4.32635	3.88378	4.13917	4.09275	3.33854	4.09943	4.07617	4.09511	4.04689	4.05688
ENSG00000006453.14	1.60426	1.75442	1.19975	2.78536	0.645425	1.46446	1.71861	3.88474	0.954345	3.09337	0.824401	1.65503	2.04131	0.809414	2.26631	2.18618	2.98267	1.51644	0.735695	1.32562	0.83374	1.79768	1.4899	1.01192	1.46242	2.21101	2.9875	0.829362	0.914029	4.36361	3.86827	2.93947	2.06741	3.00938	2.63722	2.4906	2.48782	1.69528	2.74181	0.949124	0.584482	0.323889	1.79585	1.83726	1.03633	1.68014	1.01742	0.875387	1.47176
ENSG00000006459.11	1.8612	2.09397	1.57981	1.83394	2.82686	2.91069	2.64044	2.39144	2.33677	2.68008	2.02545	2.2121	2.59803	2.01721	2.32386	1.12161	2.37002	2.48259	2.6133	2.48828	2.14016	2.25093	2.6287	2.11053	2.50014	2.03037	2.5213	1.77421	3.40122	2.34119	1.6845	3.572	2.14228	1.4881	2.62141	2.79179	1.93403	2.08328	2.57202	2.83857	2.00241	2.80946	2.00306	1.92029	2.60431	2.41262	2.27724	2.71677	2.28021
ENSG00000006468.14	0.704606	2.53533	0.513592	1.83895	1.12314	1.91303	3.86624	0.265197	1.07053	2.8941	0.855192	0.376179	1.02786	0.953377	1.57807	0.993783	2.07166	1.71934	0.368489	1.00029	1.22626	1.26993	1.2909	0.713696	1.20163	0.970927	0.659925	1.26081	1.51288	0.274291	3.53742	2.95784	1.59048	1.04453	1.52396	1.24147	1.09397	1.01578	1.10916	1.10158	0.416732	0.401194	1.47534	1.1277	0.473112	0.681854	0.904503	0.957692	0.839798
ENSG00000006530.18	1.6148	1.92706	1.20864	2.00385	1.53565	1.98353	1.79156	2.59443	1.98412	2.74397	1.61476	1.76604	2.19956	1.67541	1.74773	1.15614	1.97856	1.95832	1.72299	1.54641	1.56462	1.54463	1.80946	1.58256	1.74855	1.85384	1.9172	1.73496	2.22284	2.17389	1.90701	1.78266	1.48494	1.91456	2.1884	2.17287	2.44774	1.89588	2.12882	1.84892	2.26168	1.96521	1.49124	1.83495	2.33685	1.64339	1.69822	2.2846	1.92691
ENSG00000006534.16	3.28484	2.66567	2.03274	3.14243	2.06946	2.95136	3.81822	3.03823	2.7265	3.74026	2.24598	3.82615	2.95602	2.82544	2.97733	3.20797	3.1956	3.35298	2.83584	3.263	3.32993	2.41516	3.05179	3.91141	3.0565	2.76674	2.63496	3.55594	1.00763	0.232292	2.93403	1.56091	3.04557	2.61685	0.808179	1.09072	4.01606	3.48809	0.583615	1.97089	2.42592	3.57173	2.00928	2.79317	2.51271	3.84457	3.1254	3.26276	3.71663
ENSG00000006555.11	2.35963	3.10714	1.76184	2.0706	1.58087	1.4275	2.4603	2.30285	0.608998	2.23732	2.0915	3.05485	1.77703	1.73777	1.47233	2.48931	2.99362	1.80999	2.09576	1.28676	1.56623	1.83677	1.03189	1.72478	1.37434	2.0794	1.59908	1.60673	1.37212	0.0429244	0.561204	1.4283	2.06299	2.7238	1.82725	2.02956	2.04173	1.90281	2.08604	2.44191	2.68885	1.68952	1.10346	1.99324	2.07957	2.02613	2.20796	1.81184	2.32533
ENSG00000006576.16	1.98123	2.32161	1.50487	2.08291	1.79685	2.11033	2.18793	1.65983	2.16424	2.75937	1.95691	2.06188	2.25882	1.71365	1.8757	1.69791	2.46822	1.82904	1.94991	2.06636	1.77943	1.78178	2.34888	1.69915	1.92554	1.76914	1.88639	1.72666	3.76562	1.73088	3.09778	2.83495	2.26129	1.53725	1.91797	1.67762	1.23395	1.45754	1.74313	2.10953	2.15348	1.99798	2.34619	1.50797	2.24708	2.32354	1.70867	2.33156	1.92987
ENSG00000006606.9	0.254594	0.146786	0.576667	1.98586	0.463518	0.697596	0.217975	0.385928	0.876566	0.913876	0.331591	0.31603	0.500598	1.16569	1.69973	0.715366	0.374288	0.191499	0.342896	2.15439	0.199625	0.449429	1.58856	0.209516	0.47892	0.214	0.117163	0.0455828	0.0486547	0	1.37801	0.593975	0.274351	0.424385	0.27023	0.335712	0.0478175	0.268195	0.208517	0.314871	0.213254	0.219587	0.655077	0.80653	0.0989585	0.822689	0.191057	0.876173	0.594835
ENSG00000006607.14	1.58	1.18536	0.504163	1.06571	1.44721	1.68916	1.62349	1.74145	1.7696	1.86845	1.55405	1.09268	1.45491	1.32941	1.59355	1.12009	1.16459	1.61972	1.39791	1.54745	1.29042	1.40659	1.49165	1.31144	1.64612	1.85814	1.3878	1.94358	1.16157	0.817623	1.45038	2.22888	1.74006	0.8279	1.97137	1.99302	1.86576	1.81779	2.03242	1.69568	1.99949	1.59837	1.27971	1.52772	1.77083	1.7198	1.38565	1.766	1.76409
ENSG00000006611.17	5.47235	5.33099	3.39373	4.43607	4.85176	4.40675	5.47238	0.133169	2.73754	4.43337	5.37559	5.3964	4.6506	5.58468	0.177344	4.4456	5.11617	4.89312	5.24633	4.87884	5.04149	5.10556	4.0722	5.25929	4.66214	4.46365	4.4469	4.84638	3.85479	0.171975	0.478817	0.281787	5.49703	4.64911	0.490981	2.22457	5.06051	4.62199	1.28487	5.4415	5.45267	5.08977	5.1784	4.55043	5.5299	5.49809	5.50699	4.39486	4.98521
ENSG00000006625.18	2.46239	3.14574	2.73481	2.97942	2.21185	2.14548	2.9851	3.061	2.65938	3.65662	2.51974	2.63555	2.09923	2.3268	2.1715	2.70885	3.0869	2.30179	3.03369	2.49103	2.28998	2.4604	2.56357	3.32044	2.0058	3.25571	2.12582	2.60115	3.56679	2.8183	3.58872	3.12763	2.94532	2.79857	2.47054	2.51859	2.85509	2.96505	2.93161	2.22793	2.22382	2.91877	2.67728	2.82875	2.66086	2.01336	2.70246	3.08717	2.83582
ENSG00000006634.8	0.875151	1.25671	0.921969	1.37995	0.909811	1.06895	1.20013	1.06261	1.25828	2.4076	0.97585	1.01085	1.02475	0.985282	0.925316	1.4232	1.64131	1.25002	1.22503	1.21076	0.812211	1.02347	1.23438	1.14411	0.978342	0.913799	1.34176	0.97629	2.25529	3.68089	2.59474	1.91456	1.62831	0.970265	1.02857	0.696083	2.1168	0.402176	0.818851	0.896388	0.908813	1.06929	1.14097	0.739157	0.929337	1.02084	1.25242	1.71861	1.56169
ENSG00000006638.13	2.57855	1.32314	2.87145	2.25245	3.12876	3.34912	1.50868	2.21596	3.0108	1.22497	2.85463	0.889551	2.78693	3.08585	3.09419	0.676809	1.2318	1.62138	1.63571	2.72404	2.40106	2.53227	2.20022	1.38791	3.02093	2.26969	1.57386	0.833659	1.06392	0.572114	1.05165	0.629473	1.90835	1.3715	0.481092	0.946656	0.642378	2.45162	1.11397	2.87853	1.37	1.0916	1.75271	2.00626	1.70306	2.1274	2.28096	1.98382	2.00885
ENSG00000006652.15	0.585059	0.958509	1.5692	1.04865	0.534958	0.918081	1.21444	1.63789	1.30469	1.5201	0.664665	0.908813	1.14281	0.673195	0.444031	1.01742	1.43445	0.846353	1.15277	0.436695	0.835762	0.602457	1.01478	0.994869	0.588133	0.96414	1.4587	0.801076	1.71374	1.97863	1.38582	1.19238	0.871607	1.12532	0.926986	0.634593	1.04488	0.411101	0.625364	0.850319	1.07176	0.723253	0.560813	1.04138	1.18155	0.586404	1.16176	2.04261	0.960438
ENSG00000006659.13	0.0268709	0.023894	0	0	0	0	0	0	0.0356239	0.0272956	0	0	0	0	0	0.129085	0.0747794	0.0170667	0	0	0	0	0	0	0	0	0.0739573	0	0.0749164	0	0	0	0	0	0	0	0	0	0	0	0.0866479	0	0	0	0	0	0	0.0461418	0
ENSG00000006695.12	2.16247	1.46158	1.39012	1.41911	1.54166	1.49329	1.30999	1.49206	1.41294	1.63138	1.81869	1.98244	1.63306	1.52085	1.74666	1.04579	1.38139	1.63995	1.57192	1.55993	1.52827	1.5967	1.58106	1.60545	1.57821	1.85364	1.73872	1.78161	1.32043	1.72247	1.25562	1.50253	1.37884	1.35603	2.38103	2.14519	2.25051	2.09849	2.37798	1.67987	1.72439	1.3527	1.2587	1.67288	1.66639	1.87566	1.55552	1.32048	1.7699
ENSG00000006704.11	1.95256	2.15157	1.31829	1.52882	2.02041	1.94508	2.96593	3.39174	1.61631	2.93885	1.62821	2.52281	1.99653	1.77019	1.87598	2.64906	2.98344	1.7566	2.2637	1.4756	1.96665	2.08229	1.80409	2.13373	1.78852	2.35004	2.0009	2.06956	0.681764	2.57534	1.99978	1.77265	2.04742	2.56708	2.70175	2.86049	2.12945	2.16308	3.03879	2.29622	2.33256	1.8899	1.69853	2.29719	2.3672	1.94152	2.46289	1.93089	2.46161
ENSG00000006712.15	4.63039	4.58907	4.43262	4.95197	4.81787	4.54349	4.55975	5.22554	4.57636	4.17513	4.28986	4.50943	4.5835	4.72391	4.8045	4.80408	4.74437	4.19705	4.54595	4.37325	4.70262	4.84712	4.5773	4.45172	4.59526	4.63038	4.65151	4.275	2.97038	4.95334	4.21733	4.17601	4.29934	4.86839	4.81116	5.00284	4.75435	4.48503	4.62897	4.61033	4.24036	4.3062	4.72108	4.32302	4.44425	4.43333	4.95005	4.47522	4.95658
ENSG00000006715.16	3.9094	3.88617	2.10212	2.66275	3.45134	3.49941	3.93834	2.70642	3.31872	4.01716	3.5013	4	3.74712	3.28712	3.4358	2.41102	3.75417	3.9579	3.575	3.21459	3.40964	3.50792	3.31923	3.26415	3.39851	3.40904	3.87018	3.54086	4.49119	3.58404	3.7699	4.33143	4.68257	2.14968	4.20128	4.02269	3.99653	3.32889	4.38627	3.70255	3.58262	3.63178	3.30601	3.15178	3.91368	3.43343	3.09236	3.49927	3.27196
ENSG00000006740.17	0.710878	0.744333	0.567351	1.41824	1.37785	1.38593	0.873656	0.724476	1.54018	1.70137	1.03724	0.442864	0.928276	0.96997	1.57173	2.04345	1.82012	0.503654	0.386149	0.823505	1.00885	1.0049	1.65705	1.0743	0.928503	1.30399	1.59541	0.315566	0.804632	0.803475	0.161307	1.13606	0.879863	0.46289	1.65833	1.56755	1.26538	1.19516	1.66366	0.841973	0.767994	0.469261	0.782828	1.14176	0.843099	0.563939	0.489235	1.06998	0.629846
ENSG00000006744.19	3.68007	3.30165	2.61271	3.75936	3.24397	3.27095	2.83115	3.28525	3.05627	3.39136	3.40366	3.57069	3.10781	2.96072	3.39583	2.98034	3.29593	3.63906	3.31413	3.28487	3.28039	3.13868	3.16218	3.57871	3.199	3.39259	3.05236	3.06741	1.7863	2.92966	2.783	2.99735	3.35752	3.35962	3.76325	3.74888	3.95128	3.40301	3.79893	3.16142	3.45277	3.27906	2.93043	3.23565	3.13248	3.2807	3.31835	3.0719	3.5893
ENSG00000006747.15	1.11863	1.4117	0.618145	1.477	0.607295	0.95002	1.49805	4.87826	0.91127	2.82611	0.682663	3.02947	2.62931	0.243913	3.69823	0.155749	2.1516	2.22404	0.756682	1.29048	0.877587	1.34068	1.18008	0.137766	2.51929	4.42835	4.34707	4.15127	3.56558	5.69464	0.772224	5.21125	2.72754	1.10044	5.61809	5.26186	3.77907	4.14558	5.33563	1.21188	2.57507	0.990955	0.742696	3.82411	0.722029	4.05187	1.37929	1.41256	4.05469
ENSG00000006756.16	3.48121	3.33264	2.53214	3.0648	4.31597	3.41607	4.47864	3.68399	2.79737	3.41675	4.20832	3.71921	3.50829	3.51855	4.15858	2.84756	3.31481	3.59942	3.84408	3.29293	3.44093	3.55077	3.11183	4.11168	3.59294	3.81207	3.1376	3.77828	2.42336	3.45318	2.69517	4.4599	3.72765	2.24522	5.13058	4.86849	3.89893	4.06636	4.87132	3.68797	4.36927	2.84173	3.13926	3.94862	3.55873	3.58371	3.57187	2.49237	3.56865
ENSG00000006757.12	2.86784	3.2034	1.73531	2.51331	2.89629	2.42062	3.98155	1.75031	2.42231	2.55316	3.35993	3.05483	2.4121	3.1412	2.92987	3.04607	2.98074	2.83099	2.84487	2.80385	2.50719	2.73704	2.19096	2.82948	2.9427	3.46034	3.50909	3.58268	3.10168	3.89513	2.15218	3.11733	2.73212	2.46074	4.32533	3.61164	4.77127	3.76878	3.84765	2.87798	3.7786	3.2131	3.29776	3.29356	2.85782	2.93876	3.37348	2.32909	2.97131
ENSG00000006788.14	0	0.300182	0	0	0	0.180403	1.87452	0.00504062	0	0.0040339	0.00389003	0.289834	0.0119249	0	0	0.108759	0.0187766	0.015783	0	0.0163537	0.00705194	0.0142124	0	0.00518438	0.0102069	0	0.0112094	0	0	0	0	0.0453032	1.65134	0.0419438	0.0184917	0.0102069	0	0	0	0	0.0261627	0.0751903	0.00791308	0.00489684	0.0117819	0.0418037	0.0186342	0.0103502	0
ENSG00000006831.10	4.24603	4.0803	4.09071	3.55292	4.48867	4.0582	3.94588	3.34324	4.66842	4.31401	4.48837	4.05391	4.13304	3.8527	3.63114	4.33054	4.19193	4.09637	4.13268	3.9774	5.18581	4.18258	3.7698	3.82393	4.34808	4.03004	4.78792	3.80357	3.99956	5.30703	3.77484	3.97955	4.08968	3.28099	4.5916	4.33836	3.8699	3.92668	4.74188	4.44361	4.13558	4.09047	3.75832	3.70158	4.30622	3.78514	4.02066	3.51542	4.12219
ENSG00000006837.12	0.202637	0.35321	0.311968	0.216734	0.24184	0.27965	0.529071	0.26135	0.238053	0.206018	0.157561	0.231432	0.245131	0.133827	0.123666	0.412944	0.367371	0.418999	0.201383	0.187261	0.197614	0.163499	0.266277	0.249021	0.145873	0.18612	0.188654	0.237686	0.5144	0.139077	0.216238	0.114634	0.517729	0.259664	0.228234	0.212009	0.124593	0.0732718	0.226139	0.310922	0.390888	0.287118	0.207893	0.206393	0.456806	0.156267	0.21176	0.737081	0.354452
ENSG00000007001.13	0.463099	0.45607	0.218595	0.413702	0.143132	0.178747	1.83681	0.130667	0.0647449	0.128821	0.277628	0.709467	0.223052	0.271306	0.0743684	0.937796	1.8675	0.451224	0.43957	0.235237	0.125254	0.133695	0.0641931	0.254836	1.48965	2.71725	0.36233	0.27023	0.779722	0.11023	0.0805212	0.254231	0.380009	1.13251	0.361656	0.701771	0.111031	4.69722	0.409907	0.201383	0.179638	0.168385	0.220454	4.40311	0.41511	0.19497	0.992696	0.200379	0.570754
ENSG00000007038.11	0.0123541	0.0542233	0.121413	0.0285692	0.0204844	0.0342157	0.0684645	0.031254	0.257493	0.296546	0.0709388	0.252173	0.00920383	0.122871	0.0227584	0.0607392	0.0575542	0.0399104	0	0	0.021764	0.0436245	0.184852	0.0475384	0.0831112	0.0117819	0.0514417	0.171463	0	0	3.02478	0.189919	0.0832474	0.0146409	0.093425	0.015783	0	0	0.026446	0.0913952	0	0.108759	0.0955869	0	0.139469	0.0802483	1.37823	0.1038	1.07348
ENSG00000007047.15	2.91181	2.87607	2.59452	2.84832	3.12052	3.03432	3.10147	2.56111	3.07094	2.53638	2.69842	2.45289	3.0282	2.7363	2.94415	3.34376	3.23954	2.25896	2.43731	2.60357	3.12659	2.93089	2.82853	2.92799	2.8901	2.52647	2.74166	2.87831	0.943209	2.75719	2.9362	2.02899	2.52482	2.91642	2.45418	2.62204	2.93789	2.53354	2.59464	2.81588	2.29269	2.29314	2.57277	2.34542	2.74782	2.74644	3.0442	2.50228	2.8792
ENSG00000007062.12	4.83159	4.9033	0.158078	0.863146	0.0107798	2.90614	3.2496	6.74865	0.125519	1.95267	0.296428	7.27089	4.80443	1.05956	5.7112	0.36446	3.17913	4.77733	0.0150693	2.4837	2.99077	3.97308	3.18617	0.0336521	2.32565	3.33949	4.38132	4.54062	5.08661	0.176961	4.54351	6.39805	4.90097	0.0569996	5.39382	5.63534	2.12562	2.99982	5.31941	2.76772	0.119555	2.28383	1.19617	2.69904	0.27608	5.84847	1.48671	1.43157	4.91755
ENSG00000007080.11	4.94843	4.40714	5.10185	4.99889	4.90095	4.43008	4.58978	5.21799	4.67522	4.44826	4.15406	3.91171	4.31678	4.95774	4.67543	4.70856	4.96369	4.23967	4.44068	4.93236	5.00685	4.90333	4.7568	4.96078	4.46388	4.44251	4.63541	4.61318	0.383497	5.09285	4.74391	3.31848	3.88461	5.71897	4.14891	4.52842	4.75497	4.35862	3.93583	4.01657	4.57339	4.83275	4.88901	4.11223	4.59078	4.57877	5.54682	5.0293	5.14679
ENSG00000007129.18	1.12121	1.32659	0.52296	1.58328	1.23106	1.63394	1.2756	0.716771	1.40403	1.07663	1.06647	1.10299	0.97695	1.27852	1.18549	0.542506	0.713784	1.08383	1.10091	1.11477	0.740798	0.96192	1.91146	0.563646	1.00159	0.556797	0.768671	0.412511	0.572696	0.15095	1.1173	0.71563	0.98943	1.64529	0.29443	0.398131	0.364348	0.344601	0.366028	1.17945	0.686164	0.915865	0.966209	0.328492	0.666393	2.81488	0.467488	2.02148	1.82399
ENSG00000007168.14	3.80333	3.5021	2.46877	3.14594	3.77558	3.9079	3.2034	3.30472	3.91565	3.42714	3.7913	3.55822	3.86718	3.37708	3.6351	2.36952	3.3234	3.85427	3.48882	3.67992	3.52091	3.6372	3.52365	3.17639	3.77347	3.80971	3.65588	3.04275	4.10642	3.26073	2.91366	4.14121	3.94845	2.41835	4.06519	3.72236	3.56372	3.69697	4.17109	4.0735	3.63895	3.58886	3.1145	3.47357	3.59206	3.70682	3.29154	3.29684	3.46377
ENSG00000007171.18	1.60568	0.17645	0.517931	1.56545	1.95888	2.63907	0.125916	1.3527	1.94553	0.713432	2.13547	0.4728	1.69439	1.96207	1.7294	0.222434	0.314986	0.739934	0.433173	1.50462	2.02031	1.09342	1.30474	0.495388	1.25562	0.753776	0.585059	0.364236	0.198871	0.064607	0.225028	0.332278	1.19317	0.0892269	0.537942	0.739675	0.281194	0.893828	0.618896	1.90246	0.156526	0.346531	0.346758	0.83996	0.669117	0.601221	0.751464	0.444137	1.4517
ENSG00000007174.18	0.109829	0.658737	0.0233263	0.0765591	0.0094905	0.0706641	0.278817	0.179384	0.0153548	0.0277203	0.0112094	0.313826	0.0807941	0.141694	0.135929	0.0794293	0.314986	0.205643	0.0920721	0.0880059	0.0388576	0.0556122	0.0381552	0.00374614	0.0924781	0.297837	0.113834	0.0912598	0.195348	0.0394192	0.0497702	0.39835	0.793605	0.00676478	0.491289	0.313826	0.129085	0.275841	0.263996	0.0953168	0.0119249	0.263155	0.636451	0.229957	0.0776532	0.0209111	0.0352016	0.0861044	0.263034
ENSG00000007202.15	4.67685	3.7286	2.40182	3.2627	3.91163	4.4439	4.18325	3.10086	3.9555	3.74928	3.54125	3.72934	4.07455	3.98092	4.17526	3.80502	3.63323	4.38693	4.01927	4.56034	3.49914	4.24952	3.67375	3.20816	4.48004	4.10315	3.89867	4.16884	2.98585	3.44228	3.99466	4.3374	4.70508	3.5286	4.45445	4.14964	4.22635	4.37636	4.51503	4.31994	3.40384	4.04667	3.71753	4.02836	3.38981	4.59566	3.97896	3.51802	3.88311
ENSG00000007216.15	0.28155	0.0267293	0.104337	0.0174944	0.27858	0.106884	0.00848689	0.0192037	0.0100637	0.0230424	0.0579701	0.152638	0.0113525	1.33193	0.0277203	0.591775	0.0142124	0.0122826	0.114767	0.375846	0.0458623	0.013498	0.00748258	0.0194884	3.24298	4.1483	0.1125	3.05106	0	0.0149265	0	0.829444	0.0361165	0.0177794	1.50823	1.16941	3.94761	5.01437	0.453122	0.49774	0.131589	0.123799	0.0662614	4.49727	0.13829	0.0973411	1.8425	0.00662118	1.58583
ENSG00000007237.19	1.57618	1.28214	0.71914	2.04611	1.11617	2.22259	1.60022	0.186501	2.10806	2.40741	1.1877	2.14929	1.25266	1.19447	1.68706	0.642286	1.45796	2.08943	1.75634	1.67956	0.896466	1.50157	1.7988	0.751635	1.66252	1.05186	1.09694	1.32924	1.18485	0.164271	1.60706	2.51654	1.96529	1.42029	0.960586	0.796515	2.34398	0.686971	1.6787	1.35462	1.0202	1.39034	0.818851	0.967833	1.47332	1.85782	1.27572	2.63719	2.58532
ENSG00000007255.10	4.20134	3.91398	4.23063	4.0925	3.74552	3.79085	3.94674	5.09834	4.11711	3.95836	3.80291	4.14232	3.79368	4.72064	4.35689	5.58603	3.95171	4.04095	4.37122	4.75236	4.49329	4.04177	3.80935	5.52257	3.94749	4.69873	4.02966	4.37227	0.417488	4.87153	3.73818	3.68514	4.19702	3.6573	4.76795	4.69781	5.42468	4.88897	4.49147	3.90827	3.95656	3.79529	3.72606	4.58518	4.31088	4.46241	4.7071	4.44349	4.6134
ENSG00000007264.15	0.81746	0.984699	1.25954	1.8746	1.08277	1.10481	0.817214	0.682124	1.55807	0.648373	1.26352	0.861558	1.03407	1.76901	1.59431	0.684011	1.55934	1.2552	0.685088	1.43984	0.853597	0.643856	0.854395	1.97324	0.557582	0.504875	0.892508	0.341644	0.0894982	0.328262	0.835358	0.332966	1.29125	1.42745	0.106214	0.105544	0.283685	0.353436	0.0335111	1.30515	0.519139	0.719928	0.768756	0.477056	0.913569	1.24896	1.2102	1.60426	1.30958
ENSG00000007306.15	0.0183493	0	0.0370307	0.0106366	0	0.00647756	0	0	0	0.0278618	0	0	0	0	0	0.0152121	0	0.00496873	0	0	0	0	0	0	0.015783	0.164786	0.0508847	0.0122111	0	0.0271541	0	0.190425	0	0	0.0969365	0.0968016	0	0.0760117	0.0326651	0	0	0	0	0.0451634	0	0	0.0107798	0	0.0214797
ENSG00000007312.13	1.26195	0.896621	2.53817	2.0995	1.51071	1.82073	0.807932	1.4298	2.35662	0.725174	1.76328	0.887681	1.33617	2.0706	2.11243	0.917623	0.878921	1.22203	1.52752	1.87125	1.44779	1.06495	1.11443	1.19516	1.23235	0.620399	0.867659	0.523763	0.26135	0.217603	1.09187	0.82024	1.56956	2.88618	0.564427	1.09768	1.19245	0.533763	1.17671	1.54582	0.346645	0.750178	1.14822	0.725698	0.802814	1.13829	1.93716	1.80124	1.264
ENSG00000007314.12	1.1277	0.166587	0.923644	0.502738	2.22466	3.44664	0.356707	0.248899	1.04544	0.202637	1.01278	0.25544	1.33754	1.88811	0.944559	0.0437644	0.422341	0.557925	0.695816	0.671746	1.17089	0.910809	0.155879	0.520649	1.9895	0.32112	0.927214	0.038998	0.272023	0.222681	0.365357	0.0503276	0.831067	0.0982848	0.584866	0.284751	0.239887	0.573181	0.886589	2.1104	0.429214	0.113434	0.624054	0.277509	0.600555	0.278698	1.50752	0.575216	0.695103
ENSG00000007341.19	0.909581	0.896698	0.694033	0.872395	1.01578	1.12644	1.03816	1.19692	1.23567	1.13953	1.1117	1.27202	1.36955	0.83754	0.870266	0.81705	1.09221	1.26195	1.16774	1.14971	1.1689	1.05346	1.22817	0.762646	1.10554	1.04082	1.10125	1.09828	1.56013	0.900876	1.24853	1.22959	1.57308	0.881743	1.44164	1.42702	1.37984	1.05339	1.54701	1.36592	1.66394	0.82546	1.00202	0.998196	1.33828	1.11163	0.951066	1.17779	1.17702
ENSG00000007350.17	0.0809305	1.6427	0.360758	0.0551957	0.566669	0.0890913	0.0385767	0.0519985	0.0545012	0.0418037	0.1956	0.0687396	0.10017	0.111833	0.283922	0	1.64649	0.0806577	0.0127832	0.0142124	0.0301242	0.0723116	0.234256	0.299362	0.125519	0.0453032	0.125783	0.0183493	0.0388576	0.118626	0.148348	0.181293	0.253142	0.0483757	0.153157	0.147307	0.147176	0.0894982	0.128293	0.0740944	0.0451634	0.106348	0.137897	0.0255958	0.0302654	0.0453032	0.0714881	0.064607	0.063779
ENSG00000007372.24	0.00230647	0	0	0.112233	0.00590296	0.00748258	0.0575542	0.00302648	0	0.102457	0.216113	0.00762609	0.00532812	0.00302648	0.00216242	0	0.204266	0.00151404	0.00216242	0	0.00201836	0.018919	0.00475306	0.00158609	0.00100953	0	0.00417776	0.397255	0	0.00230647	0.0278618	0.00230647	0.00165815	0.0277203	0.00187429	0.00144197	0.00331439	0	0.00345832	0.0040339	0.00389003	0.00129784	0.0291348	0.00144197	0.00518438	0.00158609	0.0220482	0.0122111	0.0234683
ENSG00000007376.8	2.86718	2.88023	3.15139	3.13885	2.57461	2.69093	2.56413	2.79691	2.56218	2.69891	2.42218	2.12168	2.47985	2.55127	2.68257	3.51473	2.86441	2.41133	2.27426	2.83736	3.02482	2.59925	2.60516	3.11952	2.43816	2.31377	2.63138	2.30568	0.0124972	2.0345	3.02217	1.4878	2.44355	3.15981	2.51392	2.09714	2.96244	2.30714	2.15737	2.29625	2.60319	3.04177	2.65423	2.17204	2.44943	2.65398	3.21145	2.95921	3.41704
ENSG00000007384.15	3.21302	2.22376	2.56589	2.66696	2.92697	2.99505	2.03411	3.53297	3.69081	2.44387	2.51225	2.14643	2.98114	2.38538	3.21563	3.09739	2.26819	2.26966	1.87869	2.19122	2.53436	2.84808	2.6107	2.39569	1.98721	1.84435	2.22296	2.75071	0.420294	1.99689	2.7722	2.27566	2.11645	2.8693	2.01368	2.62985	3.46354	1.7208	2.13711	2.48556	2.19843	2.20855	2.1234	1.94174	2.18846	2.06829	2.44395	2.82695	2.76386
ENSG00000007392.17	1.58193	1.83487	2.67129	2.36709	1.61094	2.87387	2.82636	4.20283	3.25984	2.46255	1.67478	1.69162	3.22251	2.07963	1.92216	2.91443	2.86892	2.38078	2.10729	1.34352	1.65457	1.94797	2.67559	2.09795	1.62873	1.87161	2.508	2.32103	1.73989	2.40111	2.23863	1.78589	2.20538	2.86655	2.15212	2.14535	2.09761	1.51278	2.02016	2.27668	2.78816	2.12095	1.69742	2.57415	3.07283	1.36871	2.44694	4.27494	3.08694
ENSG00000007402.12	0.206393	0.157949	0.779554	0.232661	0.593019	0.36793	0.171591	0.380175	0.588421	0.348459	0.335026	0.135666	0.406319	0.362217	0.557091	0.664483	0.229342	0.309351	0.167615	0.225275	0.321582	0.259905	0.249142	0.448584	0.488412	1.68167	0.517225	0.473319	0.0779266	0.258217	0.261591	0.585155	0.274053	0.359746	0.665938	1.88557	2.03752	1.0018	1.12035	0.384271	0.270828	0.172872	0.208143	1.12941	0.260026	0.217355	0.470407	0.408386	0.554442
ENSG00000007516.14	1.55474	0.818932	1.03295	0.573956	1.62691	1.50452	1.3065	1.5214	1.07724	1.06998	1.40692	0.500904	1.4689	1.30048	1.15517	1.01457	0.909504	1.01871	1.06771	1.26664	1.71655	1.22404	0.794353	1.53222	1.18941	2.10554	1.45633	1.04271	0.033793	2.64939	0.866235	0.52306	1.41789	1.03295	2.37676	1.8788	0.773068	2.33053	2.69017	1.46174	1.44297	1.27626	0.833983	1.98484	1.1714	1.00978	3.26628	0.663663	1.38139
ENSG00000007520.4	5.12829	4.74943	4.71052	4.70904	4.40022	4.42793	4.8683	4.51625	4.40811	4.3729	4.3559	4.08319	4.08114	4.96084	4.39287	4.80088	4.80564	4.57554	4.51418	4.94659	5.10227	4.5115	4.30644	5.07753	4.23324	4.35605	4.73392	4.3645	0.601792	4.53539	5.51967	3.38819	4.27074	4.76521	4.26894	4.40771	4.3381	4.37168	4.23252	4.20596	4.59202	5.66759	4.64537	4.26882	4.33148	4.68237	5.52024	4.49362	5.04465
ENSG00000007541.17	2.87334	2.39061	3.21763	2.356	2.10551	2.18897	2.3189	3.04757	2.33001	2.00942	2.7999	2.19544	2.26799	2.54189	2.32711	2.99751	2.7196	2.26451	2.46835	2.41083	2.64051	2.19361	2.14463	3.03235	1.99146	3.10921	2.62684	2.6663	0.147046	2.95179	2.4187	2.00299	1.74252	2.36648	3.07791	3.22429	3.1319	3.16766	3.27617	2.27608	2.82821	2.50174	2.37729	3.28078	2.74825	2.08369	3.20478	3.30232	3.15882
ENSG00000007545.16	1.15523	1.06323	1.24762	1.14006	1.15691	1.8608	1.22416	2.23419	1.63152	1.25574	0.811471	0.936666	1.88483	1.1818	1.46399	1.48269	1.4297	1.15675	1.01336	0.885106	1.2107	1.25429	1.57434	1.02354	1.22163	1.01557	1.37879	1.07745	0.754032	1.26285	0.992406	1.03358	1.12935	1.71136	1.13396	1.24178	1.20646	1.03569	1.35614	1.62433	1.75335	1.29272	0.84559	1.1038	1.38411	1.10956	1.17645	1.87507	1.52165
ENSG00000007866.22	2.96297	2.06881	2.57051	3.2705	2.79898	2.89159	2.58087	4.598	4.23036	3.31504	2.86241	2.43555	2.43384	3.13836	4.06007	3.28274	3.16	1.50154	2.70748	2.94897	2.43307	2.71732	3.18764	3.30773	2.65732	3.13899	2.227	2.48813	1.05818	1.78852	1.2828	3.47111	2.15049	3.12879	2.71495	3.37129	3.18512	3.12729	2.76732	2.70821	2.64242	2.12261	2.51056	3.13281	2.74015	2.89528	2.62279	3.17978	2.91651
ENSG00000007908.16	1.19812	0.756596	0.778797	1.13402	0.873104	1.53541	0.729792	0.513895	3.12246	3.79562	0.838831	0.38648	0.804384	1.02098	2.37968	0.0436245	0.700617	1.09505	0.947778	1.39259	0.913952	0.859174	0.976144	0.391218	1.54062	1.87074	2.42817	0.328607	0.842456	1.09869	0.0395596	4.06834	0.925544	0.315682	1.3027	2.96888	0.718088	0.701593	0.832931	1.23983	0.174023	0.314523	1.55129	0.683652	0.356482	1.13947	0.89173	0.328951	1.66389
ENSG00000007923.16	3.33851	2.79552	1.259	2.1563	2.94897	3.05892	3.44119	2.08151	2.56409	2.5477	3.21086	3.34278	3.05967	2.9913	2.91797	2.82285	2.8184	2.81425	2.73803	2.6771	2.85092	3.02434	2.61586	2.22635	3.18311	3.24791	2.9321	3.47236	1.59622	2.86574	2.38833	2.64346	2.78352	1.90431	4.34623	4.76009	3.31513	3.58138	5.18834	3.37476	3.06533	3.16994	2.56267	3.53959	3.13394	3.09346	2.92619	2.51969	2.82412
ENSG00000007933.13	2.50343	1.03005	1.83661	4.47114	1.74868	4.03274	2.79156	1.7366	3.9157	2.6976	2.73383	2.3533	2.73842	4.30023	4.20496	2.87082	1.84575	1.81525	0.757194	4.91888	1.5202	2.60103	3.74249	3.18843	3.05591	2.34227	1.97787	0.336169	1.59655	1.07895	0.59053	0.238665	2.92906	1.84028	0.307195	0.264957	0.366252	2.87723	0.330903	2.27611	0.324695	1.39813	2.03164	2.84884	1.11916	3.37614	2.36177	1.7212	2.82605
ENSG00000007944.15	4.43136	3.80934	4.01229	3.41485	4.90928	5.29993	3.7312	3.51836	4.21496	3.12281	4.78996	4.02279	5.43864	5.25621	4.16252	2.82888	3.68629	4.9103	3.98494	4.70479	4.83413	4.7502	4.14722	3.51937	5.28912	4.53517	4.33596	3.67349	5.53772	2.37262	3.0552	4.3862	4.8077	2.49155	4.35417	3.79333	3.6089	4.39333	4.02346	5.15171	4.55988	3.74179	4.35231	4.21456	4.40067	4.57222	4.2935	3.88838	4.65428
ENSG00000007952.18	0.31823	0.374177	0.974162	0.430285	0.26123	0.17645	0.354001	0.161823	0.18053	0.217727	0.474773	0.407298	0.286171	0.462681	0.229342	0.402286	0.338681	0.334282	0.311619	0.194339	0.317536	0.341872	0.323197	0.352307	0.221692	0.436801	0.230203	0.235727	0.925848	0.315218	0.273217	0.70248	0.172999	0.42094	0.41846	0.288654	0.406754	0.367818	0.325617	0.3122	0.274053	0.250234	0.2929	0.261591	0.246712	0.329755	0.460376	0.365916	0.418999
ENSG00000007968.7	0.47633	0.610322	0.147307	0.903115	0.338453	0.639788	0.157691	0.0169241	0.430392	0.880333	0.424062	0.62714	0.486972	0.435202	0.347325	0.672471	0.344601	0.394459	0.415542	0.414027	0.316841	0.281906	0.313826	0.411318	0.313478	0.0294175	0.212756	0.103531	0.184852	0.0943712	1.26885	0.669027	0.409092	0.689389	0.0241778	0.107554	0.170694	0.0532504	0.065848	0.541217	0.479955	1.37912	0.411209	0.0384362	0.454386	0.502229	0.762391	1.15439	0.823749
ENSG00000008018.9	5.09727	5.63962	5.99418	6.39401	5.72121	5.51962	5.33048	6.21451	5.53068	5.88768	6.13889	5.13533	5.58213	5.95121	5.91555	5.52174	5.60654	6.02854	6.21592	6.03232	5.84951	5.76259	5.44037	5.65912	5.66989	5.5107	5.5905	5.5674	5.54332	5.35425	5.47176	5.31798	6.25308	5.58206	5.76339	5.70364	6.24255	5.39625	5.49935	5.82573	6.09662	6.13368	5.73275	5.33291	5.64397	5.84961	6.34815	6.15061	5.77123
ENSG00000008056.14	0.268315	0.682663	0.829768	0.710614	0.275365	0.876252	0.41446	0.891341	0.661111	0.419647	0.122341	0.588037	0.74192	0.247685	0.871922	0.605305	0.475604	0.364684	0.219339	0.497229	0.865998	0.31371	1.04418	0.332278	0.266517	0.270708	0.367259	0.125254	0.107554	0.260387	2.3088	0.459432	0.463309	0.336855	0.181421	0.297837	0.816149	0.350271	0.159758	0.191057	0.211012	1.06267	0.449218	0.273576	0.164014	0.680954	0.429429	0.350837	0.383276
ENSG00000008083.14	2.18072	1.8585	2.26336	2.17105	2.74248	2.98994	1.96853	3.00373	2.57255	2.28833	2.38805	1.99386	2.91025	2.03101	2.57957	1.64916	2.05589	2.25969	2.27175	2.06316	2.3584	2.31313	2.41031	1.80261	2.29314	1.90146	1.76375	1.84149	2.20502	1.25665	2.23766	2.39276	2.65671	1.756	2.14884	1.83151	3.72124	1.6427	2.14401	2.52672	2.1878	1.66394	1.82249	1.68383	2.44021	2.00274	2.35174	2.45228	2.40507
ENSG00000008086.13	2.30556	1.31452	0.665029	1.15465	2.00173	2.02116	2.87818	1.68154	1.57231	1.50274	2.24025	1.52492	2.07156	1.67527	1.62765	0.819832	1.56081	2.17932	1.42283	1.59283	1.4321	2.11683	1.52987	1.64943	2.1539	1.51702	1.5592	2.09798	2.06447	0.949199	1.01164	2.18336	2.08093	0.428571	2.13675	1.80933	1.81447	1.74936	2.40999	2.28176	2.1605	1.57739	1.419	1.14854	1.86005	1.73253	1.22565	1.03576	1.31823
ENSG00000008118.10	0.461633	0.195096	0.743903	1.33142	1.21325	1.91016	0.179001	1.1238	1.18707	1.47747	0.980098	0.45586	1.35502	1.67202	2.21254	0.739416	0.847195	0.389457	0.656451	1.70527	2.18938	0.847436	1.01778	1.42793	0.880098	1.46514	1.10467	0.911807	0.483468	0.300885	0.532167	1.51773	0.574247	0.451224	2.06233	1.14463	1.4665	1.35941	1.40784	1.4982	1.23548	0.373175	0.793605	1.3966	0.661111	0.463518	0.564329	0.832607	0.960734
ENSG00000008128.23	0.133169	0.206643	0.283803	0.388355	0.186374	0.257252	0.253021	0.597507	0.561302	0.213627	0.129876	0.210389	0.289126	0.135929	0.106884	0.187388	0.264957	0.143328	0.168257	0.118758	0.14091	0.146655	0.276794	0.208642	0.0487942	0.175684	0.132116	0.197111	0.00676478	0.0787464	0.148609	0.09815	0.0990932	0.527371	0.0692897	0.0690147	0.229219	0.0458623	0.109427	0.131589	0.287236	0.0951818	0.0790196	0.231432	0.353097	0.0440443	0.238909	0.41684	0.0930192
ENSG00000008130.15	3.2706	2.96185	2.16932	3.01235	3.00502	3.37571	3.04675	3.13189	3.53602	3.49985	3.03282	3.40129	3.31264	2.94433	3.20711	3.3419	3.31381	2.97026	3.17049	3.22492	2.64533	3.15403	3.38587	2.57812	2.99277	2.86011	2.99812	3.23727	1.18631	2.38178	3.8035	2.91955	3.18075	3.21076	3.56897	3.10546	2.75546	2.77899	3.23568	3.14452	3.27749	3.00617	2.76354	2.76326	3.12563	3.2014	2.91089	3.19642	3.32856
ENSG00000008196.13	0.140124	0	0.10165	0.0183493	0	0.0164963	0	1.69693	0.0313952	0.153416	0.0230424	0	0.00302648	0.00518438	1.79764	0.077243	0.0588014	0.00970547	0	0.106482	0.0104934	0.0419438	0.00389003	0.00518438	0.807602	2.5476	0.0760117	0	0	0.00389003	0.404794	2.34568	0.0136409	0	3.58682	3.10405	0.461319	2.85128	3.43061	0.1644	0.0130692	0	0.00791308	2.7488	0.00877371	0.00532812	0.667938	0.00345832	0.665484
ENSG00000008197.5	0.0110662	0	0	0.0127832	0	0	0	0	0	0	0	0	0.00834346	0	0	0.0364682	0	0	0	0	0.0193461	0	0	0	0	0	0.00776959	0.0146409	0	0.021764	0.594835	0	0	0	0	0	0	0	0	0	0.0539454	0.0124972	0.010923	0	0	0	0	0	0
ENSG00000008226.20	0.0289934	0.0586628	0.00590296	0.0856966	0.0216219	0.158596	0.0740944	0.717123	0.333653	0.163628	0.0199154	0.0739573	0.0727232	0.0592168	0.18053	0.0806577	0.104202	0.114567	0.0270125	0.0328061	0.0330882	0.0311128	0.0901759	0.0486547	0.106884	0.135141	0.0604625	0.253505	0.0206267	0.0116388	0.0716254	0.118891	0.654527	0.215368	0.118094	0.164529	0.0522768	0.0994972	0.075738	0.0699771	0.12075	0.0492125	0.0144981	0.194087	0.108089	0.0154976	0.023894	0.187894	0.128557
ENSG00000008256.16	3.01562	2.27107	2.2846	2.8843	4.00483	3.70877	2.88108	2.1738	4.18168	3.37679	2.98205	2.01528	3.30765	3.37104	3.98512	2.74747	2.99099	2.66529	2.58597	3.57242	3.23358	3.31191	3.00527	2.9129	3.67575	3.13677	2.73974	2.62274	2.62274	2.92528	2.88862	2.9544	3.34628	1.98412	3.3779	3.00877	2.74071	3.05702	3.67989	3.40439	1.87232	1.80628	2.71414	2.98205	2.67951	3.04168	2.60514	2.62232	2.70144
ENSG00000008277.14	0.98156	2.27286	0.660472	0.702923	2.05401	1.13429	1.9983	0.438612	0.72927	0.894604	1.95435	2.04415	1.74983	1.76727	1.29408	1.91445	2.72485	1.4452	2.13809	1.28836	1.1279	1.44536	0.821384	1.96236	1.65682	1.59841	1.65727	1.47285	2.17903	0.669117	0.18574	1.69252	2.27298	0.524565	2.54629	1.81787	1.2112	1.3744	2.23116	2.11096	2.36969	1.36949	1.40398	1.22854	2.7405	1.25363	1.65301	1.92907	1.47218
ENSG00000008282.9	5.91763	6.13206	5.01821	5.13467	5.80044	6.06771	6.04325	5.87605	5.57129	5.98649	6.47992	5.99268	6.04541	6.09934	6.0252	5.22581	6.22255	5.72253	5.98027	6.20294	6.27479	5.74858	5.39822	6.26223	6.14881	6.00541	6.44463	5.98506	7.44315	6.56441	5.06602	7.26145	6.31829	4.22345	6.84236	6.49743	6.26924	5.94684	6.49629	5.93692	6.46453	6.44665	5.88239	5.51334	5.97301	6.28307	6.10528	4.8734	5.67599
ENSG00000008283.16	4.29581	3.95007	3.22392	3.7477	3.18266	3.72037	3.62165	3.17393	3.01065	3.55757	3.86195	3.82473	3.28355	3.47962	3.61153	5.31588	3.89414	3.4777	3.65663	3.66364	3.1563	3.58889	3.36299	3.61719	3.66732	3.57565	2.97361	3.84066	2.42393	2.13537	3.95814	3.67793	4.01527	3.94713	4.34836	4.20817	3.61438	3.75124	4.02397	3.17302	3.92459	4.10316	3.44853	3.35875	2.93593	3.86595	3.47678	3.14326	4.02435
ENSG00000008294.21	4.50621	3.88052	2.62546	2.96604	4.37448	4.06937	4.17665	3.73361	4.0362	3.71938	4.20689	4.35344	4.4106	4.02798	3.39682	3.4079	3.63849	4.21518	3.83523	3.71396	4.0919	4.11991	3.63971	4.05078	4.10853	3.97677	4.09683	4.14364	4.9134	3.52315	2.85519	4.08946	4.47485	2.86398	3.7785	3.68146	4.17089	3.82642	4.14678	4.89353	4.91091	3.92082	3.48787	3.33302	4.47692	3.73453	3.78976	3.47316	3.66238
ENSG00000008300.17	0.296076	0.186627	0.0285692	0.252658	0.0919367	0.173767	0.114767	0.306379	0.308361	1.64173	0.0771062	0.0792928	0.238053	0.14496	0.124857	0.682394	0.29066	0.271784	0.1133	0.0518593	0.123401	0.123666	0.311968	0.239887	0.126312	0.109427	0.188907	0.0999011	0.0395596	0.120617	2.58943	0.167872	0.0674322	0.921436	0.0578315	0.0736832	0.0579701	0.0970714	0.0716254	0.136323	0.260748	0.137635	0.152897	0.123931	0.244522	0.0886844	0.413702	0.405339	0.363339
ENSG00000008311.15	1.67297	1.14626	1.33874	1.70624	2.11103	2.72881	2.21478	1.66207	2.85553	2.20527	2.10883	0.825948	2.68428	1.89983	1.96096	1.43595	2.03675	1.91663	2.32412	1.53829	2.05068	1.90466	2.08739	1.75467	1.91115	2.78917	1.43136	2.40419	3.10395	2.27879	0.749406	2.70593	1.83927	2.549	2.2857	2.50513	2.13934	2.80676	2.10098	2.87806	3.11713	0.674009	1.24129	3.40712	2.8852	1.45428	1.8127	2.02009	1.90061
ENSG00000008323.15	1.20777	1.95245	0.869635	0.372952	0.834549	0.334225	0.836005	2.0384	0.557974	1.34255	0.776778	1.16472	1.05471	1.13442	1.11896	1.95356	2.678	0.796141	1.78818	0.307662	0.52697	1.15316	0.810073	1.82936	0.402176	0.515612	0.754203	0.131326	0.212009	0.315218	0.273934	1.58232	0.949535	2.67464	1.02084	1.12433	0.93017	0.604166	1.00676	1.52366	1.55856	1.22274	0.438932	0.449852	0.477781	0.859174	0.663846	0.652785	1.1903
ENSG00000008324.12	1.51889	1.70496	2.65194	2.4619	1.44239	1.49508	1.59579	2.52208	2.06185	2.07625	1.57831	1.55469	1.41083	1.70346	1.89348	1.85	1.56433	2.0434	1.86659	1.82456	1.46937	1.66079	1.9809	1.36283	1.35648	1.99328	1.75694	1.78492	2.37493	2.43504	1.76035	2.20714	1.52216	2.55506	2.01135	1.69024	1.86445	1.68293	1.54814	1.51637	1.39254	1.5828	1.88518	1.68513	1.40985	1.46952	2.09633	2.08083	2.18922
ENSG00000008382.16	3.37891	3.04375	2.83196	2.72391	2.4708	2.17731	2.97367	2.16797	2.36396	2.09116	2.36028	2.66614	2.34233	2.97413	2.59839	2.02485	2.93748	2.12353	2.55937	2.85535	2.20207	2.71242	2.61464	3.12656	2.38303	2.8756	2.53012	2.86552	0.234256	2.48821	2.51612	1.83103	2.6412	2.94259	2.12231	2.32717	2.87592	2.8395	2.27011	2.27375	2.68986	2.32063	3.19634	2.65865	2.82845	2.57442	3.33437	2.27959	2.65791
ENSG00000008394.13	4.16872	5.49145	2.64409	4.26555	3.36359	2.58345	5.03441	1.63003	2.08035	5.55606	4.07573	5.20836	3.82165	4.65113	0.675635	5.64769	5.39634	4.09193	4.06961	3.9944	2.87042	3.97113	3.41892	4.72236	3.8748	3.70915	3.56945	4.64166	4.94307	0.100574	3.28431	3.79716	3.79724	4.53968	0.947778	1.82636	3.11197	3.84076	0.942834	4.04305	4.41999	5.25973	4.78613	3.50372	4.00614	4.57723	4.33367	3.99333	3.91138
ENSG00000008405.12	2.28268	2.18152	2.74261	2.03721	2.63392	2.51889	1.99614	4.2677	3.64335	2.62952	2.7	2.0997	2.97278	2.23876	2.63231	1.81971	2.9008	2.17039	3.56852	2.79108	2.35913	2.54018	2.57041	2.62321	2.65976	2.45741	2.29252	2.81359	2.86916	2.84744	1.61683	3.50902	2.65739	1.1308	3.28202	3.15484	3.11367	2.32395	2.85264	3.01903	3.39918	2.63798	2.52238	2.33185	2.8482	2.50365	2.46415	2.48378	2.67753
ENSG00000008438.5	0.067501	0.0600474	0.134352	0.151729	0.330444	0.322274	0.249627	0.512379	0.467905	0.0347792	0.274888	0.655169	0.40305	0.0863762	0.0926134	0.110631	0.294312	0.165237	0.365804	0.454071	0.088413	0.118227	0.033793	0.520649	0.245131	0.0949116	0.138552	0.0453032	0	0.0668125	0	0.156914	0.171847	0.0402612	0	0.0434845	0.093425	0.041243	0.0246034	0.190678	0.161694	1.51101	0.307778	0.236952	0.255682	0.131458	0.0399806	0.296428	0.0790196
ENSG00000008441.18	3.57777	4.42118	2.18034	3.43607	4.51433	3.56918	4.56509	2.5719	4.66307	3.60739	3.90266	3.33515	4.34643	4.27795	4.88514	3.24166	4.38418	3.48451	3.64335	3.39428	4.11075	4.12573	4.2253	4.02263	3.9102	3.10556	3.23897	3.17916	2.61544	2.35327	3.76076	2.96748	3.4881	2.43192	2.35163	2.6245	2.81151	3.17792	2.86655	4.49545	3.76521	4.406	4.64816	2.88667	4.50623	3.62499	3.7243	3.0254	3.83952
ENSG00000008513.16	3.40088	2.81746	2.64187	3.34418	3.83601	4.00249	3.3749	4.83064	4.30604	3.30112	3.14151	3.19205	3.99735	3.21068	3.6506	3.21818	3.02096	3.29	3.25743	3.33256	3.75643	3.14436	4.28003	3.95831	3.89888	4.30819	4.20943	2.50655	2.45533	4.8905	3.22062	3.26052	3.15754	3.14256	2.11633	2.31258	4.52084	4.68974	2.17271	3.58011	2.8929	3.59595	3.60757	4.44124	3.17009	3.12943	3.41132	3.24735	3.53446
ENSG00000008516.17	0.257855	1.01278	0.305679	0.899098	0.368042	0.658828	0.509037	0.308827	0.846794	0.537346	0.457752	0.437121	0.680864	0.257735	0.543001	0.442227	0.36793	0.428571	0.749491	0.332278	0.496513	0.169412	0.850559	0.790605	0.380619	0.179256	0.430071	0.173127	0.0718999	0.941707	0.659468	0.275961	0.344033	0.685895	0.0526941	0.0926134	0.093425	0.113834	0.0842004	0.40021	0.684101	0.382944	0.339822	0.230941	0.696172	0.455439	0.483983	1.24878	0.804384
ENSG00000008517.18	6.10882	6.86283	6.25535	7.21958	5.21411	5.23001	5.7296	4.77439	4.87812	6.53558	6.55964	6.5483	5.02056	6.29833	4.99985	5.23892	5.06958	6.69398	6.74966	5.89004	6.09341	6.03943	5.27587	6.99199	5.17404	4.62937	5.31232	4.90678	4.06978	3.41321	6.59688	2.69553	5.45947	5.90038	1.95758	2.68675	4.67816	3.5128	2.03298	5.59225	5.80549	6.49519	6.92576	4.25913	6.28843	6.27599	7.77836	7.31333	7.58094
ENSG00000008710.20	2.20961	1.79523	0.840201	1.33125	2.08559	2.53958	2.11143	1.51677	2.85074	1.72164	1.45665	1.45759	2.56582	1.59331	2.01728	2.02638	2.05141	2.08359	1.24677	1.60909	1.97962	1.90678	2.04303	1.73609	2.04918	1.46477	1.69875	1.32958	0.0186342	1.84414	2.70858	1.28445	1.80839	1.40692	1.12941	1.33497	1.49349	1.52416	1.63185	2.29566	2.23122	1.926	1.3625	1.3376	2.10822	1.8788	1.88413	2.22014	1.77387
ENSG00000008735.14	0.117562	0.40021	0.301705	0.221692	0.104337	0.166587	0.425567	0.0681893	0.134221	0.730053	0.11836	0.0422241	0.146916	0.14978	0.253142	1.65622	1.10266	0.119821	0.0909889	0.451752	0.134615	0.0553345	0.231432	0.125783	0.205893	0.399116	0.264476	0.237808	0.0237521	0.216858	4.88483	0.0712135	0.0752588	0.151469	0.210139	0.344033	0.464564	0.607958	0.19497	0.148609	1.80091	0.373954	0.0655723	0.322966	0.213378	0.113167	0.181548	0.0954519	0.385376
ENSG00000008838.20	3.61123	3.27596	2.87611	3.37633	3.49374	3.42872	3.17284	2.96432	3.42581	3.4619	3.53176	3.20821	3.3742	3.51919	3.43455	3.59158	3.1139	3.13949	3.18031	3.21335	3.40851	3.33601	3.2482	3.50075	3.28248	3.40448	2.92174	3.43307	1.16928	2.65709	2.71172	2.71822	3.07952	3.35982	3.51221	3.53139	3.57015	3.38914	3.28586	3.47551	3.55514	3.15864	2.82348	3.18712	3.58425	3.19336	3.42824	3.43646	3.50527
ENSG00000008853.17	2.324	1.56506	1.73583	1.68921	2.4286	2.45333	1.28664	1.55616	2.31907	1.65384	1.89933	1.64764	2.39009	2.16269	2.26213	1.1113	1.79556	1.86201	1.58482	2.0459	2.41156	2.02917	1.7379	1.75005	2.27334	2.42269	2.08634	3.30862	0.733875	1.44679	2.74377	1.92296	2.058	1.73175	1.46905	1.55513	4.17963	2.40798	1.47051	2.04611	1.59875	1.34562	1.82216	2.54977	1.64676	1.75446	2.07618	1.95799	2.14075
ENSG00000008869.12	3.06705	3.01623	1.48713	2.03858	3.10705	3.02951	3.32073	1.8757	2.67494	2.75236	3.18222	3.30986	3.12395	2.73572	2.3969	1.97724	2.79581	3.50833	2.68921	2.39726	2.89678	2.6054	2.60895	2.62908	2.98357	2.65517	2.52765	2.60362	3.16048	1.41922	2.41015	2.78241	3.47428	1.89867	3.11909	2.82257	2.60992	2.68403	3.37519	3.45811	3.03663	2.87792	2.38114	2.30822	3.32263	2.85224	2.51803	2.68104	2.72216
ENSG00000008952.17	5.13303	5.3203	5.08562	4.3965	5.12983	5.13654	4.70256	4.50404	4.60487	4.53658	5.12327	5.38838	5.03681	5.12682	4.91018	4.19907	4.5672	4.77229	4.97129	5.67198	5.45319	5.07589	4.65104	4.85999	5.3068	5.01086	5.20597	4.7394	6.51134	5.10977	4.93652	5.88241	4.66837	4.806	5.55962	5.21417	5.29626	5.0744	5.52816	5.35885	5.3622	5.1452	5.26607	4.74797	4.52322	5.26317	5.09876	4.18208	5.15222
ENSG00000008988.11	6.12934	6.67698	7.68005	7.32139	6.64505	6.34951	7.38519	7.14831	6.13876	6.72537	6.06542	6.53933	6.19636	7.16025	6.54425	7.6566	7.18786	6.4457	6.71222	7.50915	6.7072	6.59062	7.00443	6.94925	6.59687	5.84558	6.45534	6.17074	5.3579	6.07087	7.0872	5.69763	6.90325	7.81597	5.8954	5.76832	7.13647	5.59702	5.52707	5.42272	6.45546	7.59816	7.27681	5.64581	6.37444	6.65554	7.09522	6.91366	6.76544
ENSG00000009307.16	6.85726	6.69102	5.43915	6.20188	7.20445	7.15723	7.07569	6.05193	6.56952	6.80543	6.83306	7.02179	6.95283	6.91018	7.04233	5.5371	6.38301	7.01928	6.83122	7.35816	7.29224	6.97395	6.83187	6.4268	7.28618	6.87518	6.90319	6.98655	7.46884	6.11392	6.8486	7.34027	7.02695	5.7315	7.09574	6.8073	6.76954	6.86589	7.0445	7.07589	7.24837	7.02456	6.54781	6.5362	6.81866	7.0911	6.82638	6.10936	6.72573
ENSG00000009335.18	3.56092	3.51277	1.93471	2.96625	3.74664	3.59947	3.68464	2.8402	3.53042	3.9299	3.63455	3.70123	3.70769	3.29391	3.49955	2.32109	3.66187	3.72016	3.74044	3.72522	3.4121	3.57052	3.28156	3.41242	3.75615	3.46	3.98667	3.85327	3.19832	4.05823	4.0422	3.82329	3.4453	2.57616	4.04635	3.69136	3.36552	3.42913	4.20808	3.75047	3.47725	3.85693	3.40346	3.14401	3.53492	3.66257	3.40993	3.10685	3.34545
ENSG00000009413.16	1.63385	1.57841	0.839637	1.04852	2.14926	2.51273	1.74889	0.886433	2.21701	1.83281	1.912	1.71154	2.62861	1.52702	1.85491	0.99581	1.68361	2.45922	1.72356	1.35355	2.22645	1.96025	1.65842	1.64602	2.2107	1.99317	1.81553	1.69964	3.00214	0.869082	2.53531	2.73392	2.83797	0.664756	1.9899	1.83887	1.53551	1.71308	2.46375	2.8012	1.94935	1.34364	1.31632	1.47503	2.38645	1.62658	1.45528	1.68307	1.6581
ENSG00000009694.13	1.19793	1.83216	0.591009	0.253263	1.09356	1.39347	2.87688	1.13783	0.978928	0.495388	1.54137	3.32014	2.15017	1.23616	0.102994	0.523462	2.36281	1.8141	1.34454	0.70558	0.848878	1.71088	0.957469	1.20395	1.08066	0.558855	0.885496	1.69893	1.91953	0.0130692	0.131458	0.547845	1.64231	0.856707	0.336169	0.266037	0.834792	0.403704	0.159371	2.4782	2.30285	1.49308	1.16524	0.749406	2.23109	0.934705	1.11183	2.43558	1.48414
ENSG00000009709.12	0	0.0166389	0	0.021764	0	0.00259452	0.066537	0	0	0	0	0	0.00288251	0	0	0	0	0	0	0	0.00331439	0	0	0	0.00331439	0.0071955	0	0	0	0	0.00475306	0.0071955	0	0.00891709	0	0	0	0	0.00273852	0	0	0	0	0	0	0	0	0.0130692	0
ENSG00000009724.17	0.147437	0.273456	0	0.0965317	0.260146	0.948451	0.663208	0.531768	0.658828	0.304745	0.198368	0.321928	1.00899	0.415434	0.392317	0.575603	0.526369	0.479955	0.248899	0.102725	0.130404	0.380508	0.333996	0.0797024	0.398679	0.276437	0.345964	0.296193	0.353097	0.156138	0.231924	0.229096	0.371057	0.248778	0.333195	0.208143	0.215616	0.333653	0.508226	0.591584	0.980757	0.154583	0.141171	0.575119	0.441165	0.283211	0.207143	0.649937	0.53087
ENSG00000009765.15	0.0736832	0.713168	0.0143553	0.0350608	0.0251706	0.137897	0.0903115	0.0209111	0.0342157	0.0611541	0.0114956	0.773996	0.120219	0.0885487	0.0301242	0.0764223	0.414027	0.186817	0.0621217	0.50711	0.0787464	0.00633393	0.016211	0.267356	1.31962	2.86084	0.161178	0.226385	0.480472	0.00934717	0	0.140255	0.0418037	0.00834346	0.328147	0.447632	0.0517201	2.85611	0.281787	0.123799	0.310922	0.323082	0.0863762	2.4696	0.365021	0.945383	0.335026	0.016211	0.770533
ENSG00000009780.16	2.3797	1.72735	1.6044	1.93719	2.32161	2.43315	2.24805	2.18231	2.48486	2.03341	2.43408	1.88006	2.42016	2.33808	2.35595	1.77644	2.14166	2.4822	2.47134	2.22534	2.53903	2.17114	2.14323	1.53122	2.35392	2.09818	2.09163	1.88503	3.43285	1.96772	1.74584	2.81852	2.45078	1.81775	2.43795	2.44414	1.57952	2.22691	2.51962	2.6345	3.30134	2.2412	2.10551	2.19582	2.43587	2.33039	2.00079	2.17524	2.22799
ENSG00000009790.15	0.735782	1.27405	0.290306	1.64542	0.596458	1.14333	1.09876	0.111966	1.40643	1.83082	0.718701	1.26039	0.952855	0.740798	0.990882	0.936139	1.20814	1.51743	1.03182	0.862114	0.497331	0.762306	1.34931	0.920903	0.664119	0.40174	0.672471	0.744592	1.04467	0.310689	1.2102	0.508023	1.22225	1.32751	0.301822	0.158337	0.353775	0.219215	0.152248	0.797096	0.719578	0.922046	0.524866	0.395392	1.58111	0.492417	0.502025	2.51828	2.00141
ENSG00000009830.12	1.56686	1.31777	0.913646	1.24714	1.61532	1.83891	1.88022	1.77121	1.61885	1.63371	1.98152	1.63835	1.99863	1.76367	1.72469	1.8853	1.62185	1.30381	1.53406	1.58376	1.28546	1.35366	1.47576	1.67243	1.62583	1.65311	1.97552	2.18415	0.767994	1.83483	2.04488	1.70814	1.40149	1.54893	2.16765	2.05134	2.36863	1.59034	2.23961	2.23441	2.03868	1.61523	1.46973	1.58169	1.52457	1.83034	1.83066	1.52296	1.31144
ENSG00000009844.16	2.56189	2.32852	1.99953	2.43133	2.67746	2.80909	2.31037	2.51622	2.43392	2.68176	3.1375	2.56801	2.8401	3.11132	2.92233	1.65837	2.45017	3.10015	2.69055	3.12332	2.98843	2.73051	2.41878	2.47358	2.93623	2.89689	2.7714	3.05735	4.22716	2.05116	2.78484	3.70068	3.06851	1.41981	3.15606	2.88961	2.79643	2.8808	2.90529	3.15653	2.94579	2.82491	2.52937	2.66966	2.75343	2.94858	2.80002	2.30597	2.5368
ENSG00000009950.16	1.68823	3.59085	4.16395	1.39583	1.00956	1.63245	2.79031	3.25603	1.64459	1.41153	0.945683	2.92024	2.34812	2.31887	0.945832	4.32918	4.50106	1.06212	3.77912	1.42546	2.0364	1.96473	1.25205	4.14392	1.95509	3.21248	2.21111	0.660929	0.443819	1.4665	0.0982848	0.298541	1.55486	0.703367	0.63951	0.927669	3.20824	2.55442	0.321582	2.86863	2.64277	0.0342157	0.887213	2.79136	4.477	2.64536	3.42925	2.02208	1.62779
ENSG00000009954.11	4.32673	4.20767	3.26488	3.76231	4.58358	4.52271	4.36917	3.57666	4.17306	4.84432	4.16251	4.4492	4.30921	3.92055	4.31496	3.46714	4.6612	4.08864	4.47225	3.67137	4.08685	4.14129	4.06417	4.50822	4.25748	3.70705	4.46021	3.78661	4.41117	3.64433	4.97068	4.29417	4.86449	3.83857	4.15588	3.92045	4.06271	3.76306	4.44914	4.65187	4.34276	4.0835	3.85041	3.30122	4.49542	3.77077	4.05753	4.16845	4.24109
ENSG00000010017.13	3.31926	2.93644	2.50075	2.89583	3.30084	3.50901	2.8031	2.77665	3.59939	3.33085	3.35468	3.59603	3.63538	3.00445	3.36029	2.39188	3.15429	3.3559	3.19114	3.24825	3.12867	3.24234	3.31245	3.12847	3.48642	3.5246	3.23732	3.44095	4.00475	3.02469	2.81166	4.03358	3.66415	2.18745	3.69688	3.22974	3.4125	3.34531	3.67323	3.48773	2.69929	3.20653	2.86049	3.20203	3.03849	3.31287	3.08868	3.01327	3.40479
ENSG00000010030.14	1.97155	2.79566	0.981853	3.13485	1.69261	1.17262	2.24099	0.725959	1.1121	1.9668	1.64233	2.73914	1.31921	1.36922	1.06191	1.88628	1.8335	3.52807	2.81396	1.37618	2.08199	2.13947	2.11547	3.01968	1.07779	0.768417	1.9279	0.831391	2.81289	0.488412	2.21301	1.28268	2.95158	3.01744	0.524164	0.882995	0.286053	0.52677	0.250113	1.7301	3.07159	2.45178	2.27387	0.60739	3.20425	1.36429	2.08614	3.22591	3.21384
ENSG00000010072.16	1.37984	1.05735	0.867738	1.36328	1.53799	1.70248	1.46315	1.18307	1.50442	1.43994	1.52842	1.19579	1.66166	1.71013	1.64879	0.963696	1.14026	1.64205	1.31644	1.5727	1.2529	1.47431	1.44265	0.909351	1.51349	1.47114	1.21711	1.50274	2.55127	0.998051	1.2107	2.17258	1.61101	0.708673	1.67007	1.48702	1.49319	1.38311	1.62162	1.783	1.34801	1.49401	1.51808	1.28309	1.08406	1.36222	1.43978	1.48414	1.46728
ENSG00000010165.20	3.46878	2.9393	1.79156	2.81525	3.2314	3.39892	3.59982	2.38756	3.12585	3.28568	3.26887	3.37866	3.51818	3.14367	3.51565	2.53968	3.23782	3.43337	2.75894	3.43202	3.20877	3.17508	3.18726	2.97475	3.30501	3.18004	3.09468	3.32188	2.13386	2.37139	3.09158	3.25139	3.82639	2.36522	3.63292	3.46966	3.41095	3.11402	3.45985	3.44375	3.27108	3.73488	2.89138	3.05903	3.39223	3.14612	2.89832	3.2826	3.23063
ENSG00000010219.13	1.01906	1.68522	1.78199	1.79581	1.2578	1.49431	1.93369	1.7458	1.53774	2.18707	1.44154	1.4598	1.35716	1.3429	1.4678	1.64478	1.96931	1.53104	1.15995	1.52155	1.37723	1.31811	1.64252	1.22441	1.25574	1.23106	1.11423	1.62555	1.15439	1.26231	1.37167	1.31249	1.97172	1.76188	1.30923	1.51516	1.53047	1.14398	1.35524	1.41533	1.09444	1.64238	1.28345	1.19717	1.10789	1.58876	1.57884	1.96872	1.70257
ENSG00000010244.19	2.74157	2.8492	2.35219	3.11848	2.7609	3.17524	3.14874	3.19365	3.10278	3.27313	2.91913	2.82971	3.14732	2.78325	2.80622	2.97633	3.0943	3.08055	3.07319	2.76619	2.65368	2.81293	3.11758	2.96934	2.77326	2.53958	2.67922	3.09429	3.4773	2.71859	2.59596	3.21481	2.84461	2.58657	3.06492	2.85718	3.05638	2.4872	2.91284	2.87615	3.3424	2.99931	2.67009	2.64943	3.17289	2.75604	2.81635	3.53939	3.06307
ENSG00000010256.11	5.59731	4.57341	4.99901	5.46008	4.99146	4.69315	4.90661	5.74891	4.81743	5.0334	4.95149	4.98546	4.59947	5.11604	5.54846	5.29644	4.43049	5.75117	5.10333	5.1661	4.98657	5.14113	4.88057	5.21633	5.16986	6.22607	6.21996	6.29051	2.2207	7.51827	5.07963	4.6676	5.01225	5.57564	6.30108	6.46692	6.57985	6.59049	6.50237	4.76688	5.07177	5.01585	5.2669	6.24142	4.87257	5.14461	5.57363	5.00364	5.607
ENSG00000010270.14	3.79256	3.94227	2.82703	3.40052	3.71731	3.65024	3.8538	3.48774	3.48863	4.59731	4.27469	3.81653	3.75884	3.95652	3.19271	3.16519	4.06593	3.87205	4.33277	4.08715	4.01858	3.74693	3.54083	4.08448	3.74113	3.1696	3.96475	4.26471	4.90477	3.11838	4.2972	3.94328	4.81953	2.68071	3.69287	3.45963	3.86087	3.21697	3.17313	3.79619	4.39564	4.77258	4.08321	3.03122	4.05564	4.19621	3.61854	3.72999	3.79099
ENSG00000010278.15	4.82986	5.20882	4.58863	3.84173	5.36668	4.84471	3.55384	7.09958	5.47777	4.59485	4.84484	4.98874	5.47449	5.1175	6.42608	4.32893	5.63114	5.24494	5.725	4.47609	5.43435	4.76033	5.12558	4.55563	5.47431	5.27105	6.44235	4.35004	4.98222	6.99825	6.03652	6.69712	5.35002	3.90415	7.05982	6.48557	4.75595	5.25956	6.41706	5.92514	5.61309	4.70136	4.37889	5.22904	5.12699	4.9224	4.7881	4.99519	5.63752
ENSG00000010282.15	0	0.203138	0	0.00977712	0	0	0.0469799	0.0735461	0.0224743	0.0255958	0.00820001	0	0.018919	0	0.0233263	0.315102	0	0.0144267	0.0156403	0.00863031	0	0.00748258	0.00834346	0	0.0144981	0.0550568	4.50508	5.3916	0	2.98026	0.427821	0.00805655	0.00583111	0.0199154	0.0325241	0	0.486972	0.0797024	0.00604663	0.00705194	0	0.0565835	0.00834346	0.111298	0.0247452	0	0.00992041	0.0146409	0.00992041
ENSG00000010292.13	3.1573	3.36431	1.87778	3.3543	3.13949	3.35048	3.14006	2.03309	3.16098	4.22435	3.29444	3.1688	3.17377	3.08374	3.21254	3.19262	3.55519	3.07763	2.67387	3.04914	3.11493	2.98788	3.04077	2.80081	3.03342	2.86505	3.05887	2.86136	2.00562	2.73762	4.24778	3.45379	3.24453	2.92869	3.14936	2.92195	3.35965	2.73416	2.95054	3.31239	2.91359	3.0085	2.77148	2.44023	3.02382	3.03025	3.35864	3.26935	3.78434
ENSG00000010295.20	2.05974	2.10158	1.9863	2.86756	2.20367	2.50604	2.75666	2.2266	3.31866	3.02563	1.86857	2.03963	3.07373	1.99704	2.21098	2.95684	3.47799	2.12961	1.57855	1.79252	2.25804	2.13806	2.88573	2.23199	1.80302	1.53575	2.16646	2.11317	0.758474	1.02744	2.46939	1.1662	1.898	3.07767	0.792522	0.999278	1.87216	1.49636	0.893207	2.45702	2.79961	2.42196	1.77846	1.96529	3.04852	1.93652	2.11173	3.83672	2.58739
ENSG00000010310.9	0.0381552	0.196103	0.0858325	0.236584	0.103934	0.176961	0.197865	0.953004	0.285106	0.308477	0.0688771	0.203264	0.336398	0.0308304	0.211012	0.673828	0.518938	0.180784	0.0440443	0.0197731	0.0251706	0.0589399	0.369271	0.148479	0.130667	0.101381	0.23952	0.24732	0.0339339	1.0743	0.873971	0.545178	0.335026	0.878058	0.746657	0.339137	0.280719	0.028852	0.458172	0.0518593	0.16543	0.0538064	0.0378742	0.12075	0.359634	0.0127832	0.277509	0.675093	0.394624
ENSG00000010318.21	0.79585	0.653519	0.683382	0.964583	0.85814	1.30545	1.34454	1.02744	1.08093	1.17792	0.73786	1.10695	1.14143	0.72779	0.877666	1.45618	0.840282	1.09383	1.01343	0.757194	0.932439	0.904272	1.0418	0.781318	0.942984	1.22429	1.50675	1.40964	0.808838	2.36185	0.888461	0.642748	1.06619	0.884168	1.21344	1.26159	1.70093	1.25731	1.52306	0.970854	1.1034	0.689478	0.714136	1.46759	1.17249	0.710085	0.978781	1.27155	1.23683
ENSG00000010319.7	3.9036	0.771548	2.07392	2.31174	3.95353	3.94261	2.7585	2.81932	4.23662	2.11613	3.36222	1.7148	3.8127	3.57795	4.24391	0.38659	1.01578	3.29867	2.08801	2.95394	3.33255	3.70235	2.05165	1.90939	3.87744	4.73915	2.58374	1.00108	1.08515	2.17773	0.539928	3.60504	3.36483	2.00892	3.88819	4.88846	2.40466	4.96302	5.39357	3.62326	0.788101	0.363227	2.18021	4.41861	1.5612	2.54947	3.86868	1.92444	3.27565
ENSG00000010322.16	2.93079	2.37782	2.42361	2.80163	3.07334	3.71813	3.12304	3.99552	3.89152	3.20611	2.78718	2.60933	3.46108	2.74226	3.90842	3.03866	2.96122	3.38441	2.40792	2.70088	2.84539	2.90741	3.16755	2.5991	3.38408	3.53982	3.5092	3.35688	1.04117	3.50315	2.54377	3.01185	2.86698	3.02324	3.66304	4.10842	3.81859	3.69854	3.93942	3.07319	3.11537	2.37568	2.55488	3.59673	3.29608	2.76492	3.0049	3.47264	3.13955
ENSG00000010327.10	4.36522	4.76629	3.4323	4.48096	4.30024	5.4848	4.21387	3.01855	6.1298	4.53286	3.63683	3.34874	4.65405	3.37095	4.24667	1.64413	3.63345	4.83032	3.1058	4.22778	4.53828	4.09568	4.71993	2.70794	4.11863	2.91778	2.9087	1.89666	0.690819	1.24641	3.28191	3.28542	4.64376	4.74069	1.52672	2.25223	1.45244	2.24065	1.95118	3.90779	2.99094	2.50896	3.21563	2.38328	3.66366	4.744	3.45543	3.52732	2.40945
ENSG00000010361.14	3.06499	3.02215	2.38819	2.35513	2.79683	2.61006	3.00856	2.42008	2.19365	1.53321	2.58758	2.90452	2.929	3.16395	2.49631	3.42386	2.79828	2.73624	2.85784	2.5924	3.14486	2.67335	2.50073	3.27581	2.66291	3.00441	2.46629	2.87468	0.942383	3.01039	2.40471	1.66275	2.81808	2.46603	2.50731	3.2021	3.10387	3.13896	2.98074	3.14238	2.48512	2.5428	2.80203	2.82603	3.09704	2.9624	3.17921	2.72006	2.93006
ENSG00000010379.16	4.8518	5.33201	5.17103	3.53011	4.37736	6.44555	3.57341	0.105946	4.27801	3.26455	5.49266	4.41704	4.83413	5.43614	0.198494	2.46811	4.64709	4.38153	5.76218	5.9262	4.84808	3.27404	2.16111	5.12458	5.71076	4.75729	5.06542	6.19861	3.99679	0.120352	0.0976108	1.14796	4.85793	2.36468	2.45591	2.88821	3.09058	4.90835	2.16475	5.8213	7.37893	4.73881	4.41474	4.61469	5.33721	5.70148	5.47162	3.01073	4.56672
ENSG00000010404.18	1.34182	1.54032	0.17645	0.517024	1.21412	1.38234	1.96247	0.691355	1.39879	0.949124	0.934781	1.42083	1.31591	0.807437	0.989139	0.591488	1.73561	1.33451	1.19137	1.31156	0.934403	1.0314	0.984042	0.901417	1.06205	0.782744	1.46759	0.968349	0.311503	0.911577	1.39479	0.80554	1.29566	0.425137	0.938474	0.792439	0.651132	0.961253	0.991318	1.2194	0.868292	1.41489	0.908121	0.722816	1.37139	1.20383	0.674099	0.909504	0.731618
ENSG00000010438.17	0	0.11703	0.0683269	1.87716	0	0	0.111699	0	0.232047	0.0848807	0.0330882	0	0.0254541	0.0219061	0.0619835	0.617675	0.959177	0.0092755	0.015783	0.03492	0.0150693	0	0	0.0220482	0.218595	0.792689	0.0473988	0	0	0.0985543	0	0.662205	0.0564448	0.292664	0.473008	0.472696	0.136979	1.14359	0.636079	0.0978804	0	0.0384362	0.0501882	1.71853	0.0738202	0.191815	0.188654	0.0724489	0.0398403
ENSG00000010539.12	1.06681	1.2532	0.811964	1.08291	1.16453	1.39726	1.14281	1.22657	1.12148	1.39265	1.14926	0.960215	1.34789	1.26069	1.02517	0.765195	1.14906	1.2291	1.13698	1.0536	1.26285	1.11036	1.10702	0.845831	1.23407	0.982875	1.1127	1.07752	1.57788	1.18206	1.29184	1.29795	1.33717	0.742696	1.08542	1.11503	1.07793	0.842778	1.29366	1.39166	1.10199	1.08936	1.20858	0.772224	0.880176	1.1501	1.10071	1.46394	1.43082
ENSG00000010610.10	4.93804	5.0065	3.47026	5.27369	4.21832	5.08415	4.60265	1.97765	5.45747	5.68404	4.56334	5.15916	4.70656	4.7139	4.75929	2.62331	4.26472	4.75825	4.89152	5.10025	4.24585	4.87545	5.47206	3.65303	4.52587	3.10663	3.96708	4.45939	3.7201	1.88866	4.92481	4.13059	4.67362	4.63648	1.6351	2.41773	2.61974	2.63745	1.63492	3.99735	3.81448	4.77736	4.23675	2.90126	4.2981	5.0794	4.23751	5.29215	5.2437
ENSG00000010626.15	2.96791	3.15288	2.76939	2.94931	2.23208	2.3471	3.7057	2.87666	1.87719	3.0148	2.88567	2.68161	2.52927	2.63022	2.52183	3.4544	2.62522	2.64024	2.5476	2.58892	2.75781	2.78511	2.47602	2.56696	2.45854	2.45885	2.59867	2.3346	1.87484	2.15653	2.60084	1.68881	3.10855	2.80731	2.22101	2.55075	3.10934	2.65926	2.61497	2.78455	3.39925	3.18751	2.59486	2.37737	3.23504	2.84601	3.03729	2.65796	3.38721
ENSG00000010671.16	2.02878	1.96945	0.748118	1.7414	1.24853	2.24866	1.46613	0.166715	2.14048	2.71675	1.54794	2.64738	1.66056	1.63529	1.64824	0.542209	1.74691	2.64027	2.51884	2.16231	1.36938	1.88842	2.1604	0.616546	1.5539	0.376624	1.36171	1.94141	1.66412	0.960734	1.76422	1.36519	2.38924	2.3941	0.179384	0.218347	1.30393	0.210389	0.206643	1.60687	1.36681	2.06022	1.28392	0.471656	1.86635	1.87098	1.42696	2.62688	2.37482
ENSG00000010704.18	2.60561	2.62564	1.52356	2.21527	2.36888	2.45754	2.22882	2.34073	2.06157	3.01805	3.01751	3.36962	2.64071	2.11467	2.52115	1.68104	2.50731	2.55743	2.44438	2.09322	2.35064	2.40193	1.82981	2.50152	2.09616	1.80074	2.28892	1.92718	3.01051	1.67541	2.12684	2.60393	3.82425	1.85718	2.22771	2.10966	1.69198	1.76265	2.13714	2.8936	3.11478	2.94176	2.00709	1.54355	2.73518	2.13895	2.83246	2.11607	1.97163
ENSG00000010803.16	3.8405	3.76591	3.19122	3.59606	3.94032	3.80761	4.37601	3.83161	3.37473	3.94993	4.01893	4.11121	4.07205	3.86473	3.66648	4.2073	4.10362	3.44959	4.29199	3.11683	3.36727	3.96602	3.55579	3.57018	3.59685	3.35702	3.45074	3.93722	2.78176	2.99453	3.49614	3.07805	3.35326	3.76372	3.35775	3.52717	3.5798	3.15947	3.55838	4.08416	4.13005	3.96127	3.7	3.26106	4.1558	3.90258	4.0081	3.45006	3.44636
ENSG00000010810.17	3.82618	3.08777	3.8313	3.90575	4.41225	4.51769	3.22216	3.38988	4.46058	3.01557	3.73778	2.57405	4.40048	3.63637	3.91805	2.00777	2.6424	3.10325	3.81737	3.60616	4.80189	3.85661	3.96595	3.4524	4.00683	3.27027	3.05462	2.96381	3.31908	1.68154	3.5305	2.48687	3.98132	2.91238	1.83038	1.83232	2.69377	3.17573	1.84711	4.22059	3.11033	2.30845	3.2776	3.04291	3.54055	2.79052	3.91579	3.14825	3.43193
ENSG00000010818.10	2.49036	2.44263	2.48648	2.52344	3.73743	3.16055	2.53598	3.12141	3.44381	2.79801	2.93299	2.52374	3.18442	2.50024	2.9843	1.46895	2.37945	2.53645	3.67032	2.44018	2.89993	2.83344	2.78107	3.37789	2.94866	2.81854	2.6994	2.24096	3.14736	2.2228	2.14731	3.21928	2.80762	1.60767	2.81244	2.72716	1.81959	2.73862	2.91044	3.50066	2.69582	2.48432	2.45807	2.37757	3.04404	2.55886	2.55388	2.70896	2.50406
ENSG00000010932.17	5.24557	4.13931	1.83996	3.61051	4.28084	3.02109	4.69335	0.075738	1.97702	2.37418	4.83591	5.15655	3.89442	6.01725	0.131721	3.1424	3.78042	3.01461	4.12678	3.92147	3.65685	4.21019	1.97251	4.0506	4.79972	5.64538	3.75334	5.85811	4.19216	0.0657102	0.220206	0.154454	2.70281	1.28392	0.192194	1.26394	4.71705	6.01924	0.147828	4.98274	4.68089	5.42275	4.67312	4.59254	4.58846	4.6304	4.81048	1.86295	3.7772
ENSG00000011007.12	3.27356	2.9715	2.7695	3.10409	3.32134	3.66911	2.94285	2.81715	3.69437	2.95557	3.35084	3.09474	3.50875	3.39311	3.27063	2.36418	2.83629	3.11097	3.42044	3.10874	3.34854	3.06963	3.39133	2.29919	3.2722	3.2933	3.08439	2.88419	3.08549	2.35738	3.63207	3.65844	3.13804	2.74992	3.46904	3.58811	2.91386	3.25911	3.71389	3.44492	3.02439	2.80797	2.95786	2.96022	3.2339	3.35486	3.23484	2.79275	3.23776
[truncated: 5,755 more rows]
[truncated: 74 more columns]

## Sheet: Table SIV
Table SIV. Survival data file of the TCGA-KIRC queue.
Sample	OS.time	OS	_PATIENT
[truncated: 944 more rows]
